# Supplementary material for: Neolithic millet farmers contributed to the permanent settlement of the Tibetan Plateau by adopting barley agriculture
Source: PubMed Central journal article supplement (PMC8291429; doi:10.1093/nsr/nwz080), 2019-06-21

## Supplementary Information (SI)

### SI text

#### 1. Identification of independently differentiated haplogroups in Tibetans.

We first identified haplogroups that differentiated independently in Tibetans based on the following. (1) If millet farmers moved onto the plateau 3.6 thousand years ago (ka), genetic relics should exist and display *de novo* differentiation in contemporary Tibetans. (2) Age estimations are essential in the identification of genetic relics of Neolithic millet farmers. However, biases will be introduced if one roughly estimates the age of a haplogroup based only on the Tibetan sequences belonging to this haplogroup, because even within one haplogroup Tibetan individuals would distribute sporadically on different branches. Therefore, only ages of independently differentiated haplogroups in Tibetans were precisely estimated.

By combining mitochondrial genome data from previous literature and the present study (Table S2), we identified independently differentiated haplogroups in Tibetans by employing phylogeographic analysis adopted in earlier research [1] according to the following criteria: (1) lineages/branches should be occupied mainly by Tibetan samples; (2) samples from other regions should have sporadic distribution in these lineages/branches based on from recent gene flow from the Tibetan Plateau into these areas. Following these criteria, we identified 140 lineages specific in Tibetans (e.g., M9a1a1c1b1a, A11a1a, G3a1a, M13a1b, M13a2, M62b1, M62b2) with *de novo* differentiations (Figure S3).

#### 2. Identification of millet farmer genetic relics among Neolithic haplogroups

We found haplogroups A11a1a, A15a, A21, C4a2c3, D4g2a1c1, D4j1a1f, D4s1, C4a1a1, and

M9a1a1c1b1a with ages between 5.2–4.0 ka. Further phylogeographic analyses indicated that haplogroup D4s1, with ancestor node (D4s, which was also specific in Tibetans) had an age during the Paleolithic period (Figure S3; Table S7) and likely descended from the Paleolithic hunter-gatherers on the plateau [2] and further differentiated during the Neolithic period. It is therefore probable that some Paleolithic haplogroups also experienced population expansions during the Neolithic period, especially during 5.2–4.0 ka, which was likely facilitated by the introduction of millet agriculture. This finds support from the rapid population growth of Paleolithic haplogroups during the Neolithic era (main text, Fig. 4). Haplogroup A21, which originated *in situ* in Tibetans during the Neolithic period, would also have been affected by the arrival of millet agriculture. However, whether it originated from northern China during the early Holocene remains unknown according to the currently available mitogenome datasets. Haplogroups D4j1a1f, D4g2a1c1 A15a, and C4a1a1, which show close genetic relationships between Tibetans and populations from southeast and South Asia (D4j1a1f and D4g2a1c1), northern China and Japan (A15a), and central and northern Asia (C4a1a1) (Figure S3), reflect Neolithic connections between Tibetans and populations from other regions. Specifically, we found that haplogroups A11a1a and M9a1a1c1b1a can be traced to northern China, with an origin time similar to the origin and development of millet agriculture, and thus could be considered as genetic relics of millet farmers that are still retained in contemporary Tibetans (main text).

## References

1. Olivieri A, *et al.* Mitogenome Diversity in Sardinians: A Genetic Window onto an Island's Past. *Mol Biol Evol* **34**:1230-1239 (2017).

2. Zhao M, *et al.* Mitochondrial genome evidence reveals successful Late Paleolithic settlement on the Tibetan Plateau. *Proc Natl Acad Sci USA* **106**:21230-21235 (2009).

**Supplementary files:**

**Table S1.** Information on 11 Tibetan populations newly sequenced in this study.

**Table S2.** Whole mitogenome dataset from previous literature.

**Table S3.** HVS dataset from previous literature.

**Table S4.**  $^{14}\text{C}$  dates of archaeological sites with millet remains (n = 120).

**Table S5.**  $^{14}\text{C}$  dates of archaeological sites with wheat and barley remains (n = 131).

**Table S6.** Radiocarbon dates of sites with human bones and stable isotope signals (n = 81).

**Table S7.** Distribution of haplogroups in different geographic regions based on HVS and whole mitogenome datasets.

**Table S8.** Coalescent ages of haplogroups with *de novo* differentiations in Tibetans.

**Table S9.** Estimated proportions of different components in Tibetans since the Neolithic period.

**Table S10.** Complete mtDNA variants and haplogroup allocations of the 682 samples in this study.

**Figure S1.** Schematic phylogenetic trees of Tibetan haplogroups based on whole mtDNA sequences from this study (black outline) and previous literature (no outline). Only haplogroups in more than two Tibetan samples were included in the tree. Lengths of each branch are in proportion to variants. Locations are indicated by different colors. Haplogroups with *de novo* differentiation in Tibetans are indicated in orange.

**Figure S2.** Contour maps of A11a and M9a1a1c1 and their sub-lineages (A11a2, A11a1a, M9a1a1c1a, and M9a1a1c1b1a) based on the HVS dataset (Table S3).

**Figure S3.** Phylogenetic trees of A11a1a and M9a1a1c1b1a. Nucleotide position numbers are consistent with the revised Cambridge reference sequence (rCRS). Suffixes C, G, and T refer to transversions; 'd', deletion; 's', synonymous mutation; 'ns', non-synonymous mutation; '+', insertion; recurrent mutations are underlined; '@', reverse mutation; 'h', heterogeneity; 't', change in transfer RNA; 'r', change in ribosomal RNA gene; nc, mutations at intergenic noncoding regions in segments 577–16023. Com, syn, and cod: coalescent age calculated based on complete genome substitutions, coding region synonymous substitutions, and coding region variants, respectively.

**Figure S4.** Frequencies of haplogroups in Tibetans. Haplogroups M9a1a1c1b1a and A11a1a are indicated in red, with remaining haplogroups indicated in blue.

**Table S1. Information on 11 Tibetan populations newly sequenced in this study.**

| <b>Population</b> | <b>Location</b>   | <b>Ethnic group</b> | <b>Latitude</b> | <b>Longitude</b> | <b>N</b>   | <b>Altitude (masl)</b> |
|-------------------|-------------------|---------------------|-----------------|------------------|------------|------------------------|
| Tib_1             | Ngari             | Tibetan             | 32.50           | 80.11            | 16         | 4280                   |
| Tib_2             | Chamdo            | Tibetan             | 31.14           | 97.17            | 85         | 3230                   |
| Tib_3             | Lhasa             | Tibetan             | 29.64           | 91.11            | 68         | 3660                   |
| Tib_4             | Nyingchi          | Tibetan             | 29.65           | 94.36            | 71         | 2994                   |
| Tib_5             | Anduo, Naqu       | Tibetan             | 32.26           | 91.68            | 63         | 4679                   |
| Tib_6             | Baqing, Naqu      | Tibetan             | 31.92           | 94.05            | 50         | 4148                   |
| Tib_7             | Jiali, Naqu       | Tibetan             | 30.64           | 93.23            | 44         | 4501                   |
| Tib_8             | Kangma, Shigatse  | Tibetan             | 28.56           | 89.68            | 77         | 4360                   |
| Tib_9             | Lazi, Shigatse    | Tibetan             | 29.08           | 87.64            | 75         | 4026                   |
| Tib_10            | Zhongba, Shigatse | Tibetan             | 29.77           | 84.03            | 48         | 4587                   |
| Tib_11            | Shannan           | Tibetan             | 28.35           | 92.21            | 74         | 3572                   |
| <b>Total</b>      |                   |                     |                 |                  | <b>671</b> |                        |

**Table S2. Whole mitogenome dataset from previous literature.**

| <b>Population code or accession number</b>                     | <b>Information</b>                                 | <b>Size</b> | <b>Reference</b> | <b>Log</b> | <b>Lat</b> |
|----------------------------------------------------------------|----------------------------------------------------|-------------|------------------|------------|------------|
| <b>Tibet</b>                                                   |                                                    | <b>201</b>  |                  |            |            |
| HM346916, HM346928                                             | Tibet, China                                       | 13          | (1)              | NA         | NA         |
| FJ544230-FJ544243, FJ968772-FJ968775,<br>GU014563-GU014569     | Tibet, China                                       | 25          | (2)              | NA         | NA         |
| GQ895140-GQ895170                                              | Tibet, China                                       | 31          | (3)              | NA         | NA         |
| FJ748704-FJ748759                                              | Tibet, China                                       | 56          | (4)              | NA         | NA         |
| KF056243-KF056318                                              | Tibet, China                                       | 76          | (5)              | 85.98      | 28.15      |
| <b>Northwest China</b>                                         |                                                    | <b>53</b>   |                  |            |            |
| HGDP00945-HGDP01251                                            | Northwest China                                    | 53          | HGDP             | NA         | NA         |
| <b>North China</b>                                             |                                                    | <b>232</b>  |                  |            |            |
| CHD                                                            | Beijing, China                                     | 139         | 1000 genomes     | 116.41     | 39.90      |
| JF824905-JF824997                                              | Henan, China                                       | 93          | (6)              | 113.75     | 34.77      |
| <b>South China</b>                                             |                                                    | <b>97</b>   |                  |            |            |
| CHS                                                            | Hunan and Fujian, China                            | 97          | 1000 genomes     | 119.30     | 26.10      |
| <b>Southwest China</b>                                         |                                                    | <b>98</b>   |                  |            |            |
| CDX                                                            | Yunnan, China                                      | 98          | 1000 genomes     | 100.80     | 22.01      |
| <b>North Asia</b>                                              |                                                    | <b>832</b>  |                  |            |            |
| FJ951438-FJ951618                                              | Complete sequences of C and D                      | 181         | (7)              | 142.95     | 50.69      |
| JN857009–JN857063                                              | Complete sequences of North Asian rare haplogroups | 55          | (8)              | 124.12     | 66.76      |
| EF153771–<br>EF153833, EF397558–EF397562,<br>EF486517–EF486519 | 71 complete mtDNA from Siberia                     | 71          | (9)              | 158.71     | 55.92      |
| KF148067-KF148359, KF148361-KF148592                           | Evenks and Evens, Udegey from Amur-Ussuri          | 525         | (10)             |            |            |

|                       |                                   |             |              |        |       |
|-----------------------|-----------------------------------|-------------|--------------|--------|-------|
|                       | Taimyr                            | 24          |              | 87.11  | 66.31 |
|                       | Stony Tunguska                    | 39          |              | 94.75  | 63.17 |
|                       | Nyukzha                           | 46          |              | 98.97  | 59.81 |
|                       | Iengra                            | 21          |              | 141.86 | 60.94 |
|                       | Sakkyryyr                         | 23          |              | 125.86 | 69.11 |
|                       | Sebjan                            | 18          |              | 127.97 | 66.80 |
|                       | Tompo                             | 27          |              | 134.57 | 66.17 |
|                       | Berezovka                         | 15          |              | 150.56 | 67.42 |
|                       | Kamchatka                         | 39          |              | 158.21 | 54.59 |
|                       | Udegey                            | 31          |              | 133.76 | 43.61 |
|                       | Vilyuy                            | 49          |              | 105.12 | 63.17 |
|                       | Central                           | 88          |              | 129.64 | 61.37 |
|                       | Northeast                         | 32          |              | 135.18 | 69.48 |
|                       | Yukaghir                          | 20          |              | 147.31 | 65.01 |
|                       | Koryak                            | 15          |              | 159.53 | 56.13 |
|                       | Nivkh                             | 38          |              | 134.10 | 46.38 |
| <b>Southeast Asia</b> |                                   | <b>1266</b> |              |        |       |
| KHV                   | Kinh in Ho Chi Minh City, Vietnam | 32          | 1000 Genomes | 106.63 | 10.82 |
| KX456435–KX457668     | Thailand and Laos                 | 1234        | (11)         |        |       |
|                       | Khon Mueang KM1, Thailand         | 25          |              | 99.45  | 19.53 |
|                       | Khon Mueang KM2, Thailand         | 25          |              | 98.51  | 18.84 |
|                       | Khon Mueang KM3, Thailand         | 24          |              | 98.49  | 19.03 |
|                       | Khon Mueang KM4, Thailand         | 25          |              | 98.68  | 18.84 |
|                       | Khon Mueang KM5, Thailand         | 23          |              | 99.08  | 18.36 |
|                       | Khon Mueang KM6, Thailand         | 25          |              | 98.53  | 18.36 |
|                       | Khon Mueang KM7, Thailand         | 25          |              | 98.31  | 18.09 |



---

|                                  |    |        |       |
|----------------------------------|----|--------|-------|
| Khon Mueang KM8, Thailand        | 25 | 98.95  | 18.07 |
| Khon Mueang KM9, Thailand        | 24 | 99.17  | 18.05 |
| Khon Mueang KM10, Thailand       | 25 | 99.21  | 17.88 |
| Yuan YU1, Thailand               | 17 | 100.22 | 17.38 |
| Yuan YU2, Thailand               | 25 | 99.77  | 13.36 |
| Shan SH, Thailand                | 25 | 98.18  | 19.45 |
| Lao Isan IS1, Thailand           | 25 | 103.44 | 15.53 |
| Lao Isan IS2, Thailand           | 25 | 102.04 | 15.68 |
| Lao Isan IS3, Thailand           | 25 | 101.77 | 17.21 |
| Lao Isan IS4, Thailand           | 25 | 105.40 | 14.70 |
| Lao LA1, Laos                    | 25 | 102.47 | 19.49 |
| Lao LA2, Laos                    | 24 | 102.63 | 17.98 |
| Phutai PT, Thailand              | 25 | 103.66 | 17.19 |
| Kalueng KL, Thailand             | 25 | 104.50 | 17.15 |
| Seak SK, Thailand                | 26 | 104.56 | 17.36 |
| Nyaw NY, Thailand                | 25 | 104.17 | 17.49 |
| Black Tai BT1, Thailand          | 25 | 101.75 | 17.70 |
| Black Tai BT2, Thailand          | 25 | 99.73  | 13.83 |
| Phuan PU1, Thailand              | 25 | 99.76  | 17.44 |
| Phuan PU2, Thailand              | 25 | 100.52 | 16.14 |
| Phuan PU3, Thailand              | 25 | 99.89  | 17.84 |
| Phuan PU4, Thailand              | 25 | 100.59 | 14.91 |
| Phuan PU5, Thailand              | 25 | 99.95  | 14.17 |
| Mon MO1, Thailand                | 25 | 102.21 | 14.85 |
| Mon MO2, Thailand Myanmar border | 23 | 98.50  | 14.98 |
| Mon MO3, Thailand Myanmar border | 15 | 98.34  | 15.06 |

---

|                              |                                         |            |              |        |       |
|------------------------------|-----------------------------------------|------------|--------------|--------|-------|
|                              | Mon MO4, Thailand                       | 25         |              | 100.54 | 14.70 |
|                              | Mon MO5, Thailand                       | 22         |              | 99.88  | 13.64 |
|                              | Khmer KH1, Thailand                     | 19         |              | 103.13 | 14.66 |
|                              | Khmer KH2, Thailand                     | 25         |              | 103.07 | 15.23 |
|                              | Nyahkur BO, Thailand                    | 23         |              | 101.46 | 15.51 |
|                              | Suay SU, Thailand                       | 25         |              | 103.13 | 14.81 |
|                              | Soa SO, Thailand                        | 25         |              | 104.25 | 17.15 |
|                              | Bru BU, Thailand                        | 24         |              | 103.68 | 17.36 |
|                              | H'tin TN1, Thailand                     | 25         |              | 100.38 | 18.93 |
|                              | H'tin TN2, Thailand                     | 25         |              | 100.31 | 19.30 |
|                              | H'tin TN3, Thailand                     | 25         |              | 100.48 | 19.20 |
|                              | Khamu KA, Thailand                      | 25         |              | 100.88 | 19.36 |
|                              | Blang BL1, Thailand                     | 25         |              | 99.60  | 20.07 |
|                              | Blang BL2, Thailand                     | 25         |              | 99.51  | 19.92 |
|                              | Paluang PL, Thailand                    | 25         |              | 99.10  | 19.55 |
|                              | Lawa LW1, Thailand                      | 22         |              | 97.78  | 18.20 |
|                              | Lawa LW2, Thailand                      | 24         |              | 98.11  | 17.95 |
|                              | Lawa LW3, Thailand                      | 24         |              | 98.62  | 18.16 |
| <b>South Asia</b>            |                                         | <b>688</b> |              |        |       |
| BEB                          | Bengali in Bangladesh                   | 86         | 1000 genomes | 90.91  | 23.39 |
| GIH                          | Gujarati Indians in Houston, Texas, USA | 106        | 1000 genomes | 78.96  | 20.59 |
| ITU                          | Indian Telugu in the UK                 | 103        | 1000 genomes | 82.22  | 22.43 |
| PJL                          | Punjabi in Lahore, Pakistan             | 290        | 1000 genomes | 74.36  | 31.52 |
| STU                          | Sri Lankan Tamil in the UK              | 103        | 1000 genomes | 80.77  | 7.87  |
| <b>Central and West Asia</b> |                                         | <b>997</b> |              |        |       |
| KM986560-KM986627            | Yemen                                   | 113        | (12)         | 48.52  | 15.55 |

|                        |                                                 |             |                        |        |       |
|------------------------|-------------------------------------------------|-------------|------------------------|--------|-------|
| HM852756-HM852785      | Armenia                                         | 30          | (13)                   | 45.04  | 40.07 |
| HM852786-HM852815      | Azerbaijan                                      | 30          | (13)                   | 47.58  | 40.14 |
| HM852875-HM852902      | Georgia                                         | 28          | (13)                   | 43.36  | 42.32 |
| HM852846-HM852874      | Turkey                                          | 29          | (13)                   | 35.24  | 38.96 |
| HM852816-HM852845      | Iran                                            | 30          | (13)                   | 53.69  | 32.43 |
| KC911275-KC911629      | Iran                                            | 355         | (14)                   | 55.81  | 32.77 |
| MF522841-MF523222      | Pamir                                           | 382         | (15)                   |        |       |
|                        | Sarikoli Tajik, Taxkorgan, Xinjiang, China      | 86          |                        | 75.23  | 37.77 |
|                        | Wakhi Tajik, Taxkorgan, Xinjiang, China         | 66          |                        | 75.44  | 37.64 |
|                        | Pamiri Tajik, Gorno-Badakhshan, Tajikistan      | 50          |                        | 73.09  | 38.41 |
|                        | Lowland Tajik, Dushanbe, Tajikistan             | 28          |                        | 68.79  | 38.56 |
|                        | East Pamir Kyrgyz, Taxkorgan, Xinjiang, China   | 68          |                        | 75.30  | 37.49 |
|                        | West Pamir Kyrgyz, Gorno-Badakhshan, Tajikistan | 3           |                        | 73.17  | 38.39 |
|                        | Lowland Kyrgyz, Artux, Xinjiang, China          | 54          |                        | 76.17  | 39.72 |
|                        | Lowland Uygur, Artux, Xinjiang, China           | 27          |                        | 75.72  | 39.67 |
| <b>Western Eurasia</b> |                                                 | <b>4535</b> |                        |        |       |
| GBR                    | British from England and Scotland               | 92          | 1000 genomes           | -2.07  | 53.72 |
| FIN                    | Finnish in Finland                              | 99          | 1000 genomes           |        |       |
| IBS                    | Iberian populations in Spain                    | 107         | 1000 genomes           |        |       |
| TSI                    | Toscani in Italia                               | 107         | 1000 genomes           |        |       |
| KX358471-KX358508      | Belarus                                         | 38          | (16)                   | 25.75  | 61.92 |
| KY408145-KY410236      | Italy                                           | 2092        | (17)                   | -3.75  | 40.46 |
|                        |                                                 |             | Li et al. submitted to |        |       |
| KF163059-KF162886      | Danish                                          | 2000        | NCBI                   | 12.57  | 41.87 |
| <b>Japan</b>           |                                                 | <b>790</b>  |                        |        |       |
| JPT                    | Japan                                           | 118         | 1000 genomes           | 139.79 | 35.75 |

|                   |                                                      |             |      |        |       |
|-------------------|------------------------------------------------------|-------------|------|--------|-------|
| AP008249-AP008920 | Complete sequences of Japanese                       | 672         | (18) |        |       |
|                   | Japanese centenarian from Gifu                       | 11          |      | 136.76 | 35.42 |
|                   | Japanese centenarian from Tokyo                      | 85          |      | 139.69 | 35.69 |
|                   | Japanese patient with Parkinson's Disease from Tokyo | 96          |      | 139.55 | 35.67 |
|                   | Japanese patient with Alzheimer's Disease from Chiba | 96          |      | 140.11 | 35.61 |
|                   | Obese young Japanese male from Aichi                 | 96          |      | 136.91 | 35.18 |
|                   | Non-obese young Japanese male from Aichi             | 96          |      | 137.05 | 35.10 |
|                   | Japanese diabetic patient from Aichi                 | 96          |      | 137.24 | 35.03 |
|                   | Japanese diabetic patient with angiopathy from Tokyo | 96          |      | 139.85 | 35.71 |
| Total             |                                                      | <b>9789</b> |      |        |       |

#### References

- 1 Peng MS, et al. (2011) Inland post-glacial dispersal in East Asia revealed by mitochondrial haplogroup M9a'b. *BMC Biology* 9.
- 2 Zhao M, et al. (2009) Mitochondrial genome evidence reveals successful Late Paleolithic settlement on the Tibetan Plateau. *Proceedings of the National Academy of Sciences of the United States of America* 106(50):21230-21235.
- 3 Qin ZD, et al. (2010) A Mitochondrial Revelation of Early Human Migrations to the Tibetan Plateau Before and After the Last Glacial Maximum. (Translated from English) *American Journal of Physical Anthropology* 143(4):555-569 (in English).
- 4 Ji F, et al. (2012) Mitochondrial DNA variant associated with Leber hereditary optic neuropathy and high-altitude Tibetans. *Proceedings of the National Academy of Sciences*.
- 5 Kang L, et al. (2013) MtDNA lineage expansions in Sherpa population suggest adaptive evolution in Tibetan highlands. *Mol. Biol. Evol.*
- 6 Liu J, et al. (2011) Deciphering the signature of selective constraints on cancerous mitochondrial genome. *Mol. Biol. Evol.*
- 7 Derenko M, et al. (2010) Origin and post-glacial dispersal of mitochondrial DNA haplogroups C and D in northern Asia. *PLoS One* 5:e15214.
- 8 Derenko M, et al. (2012) Complete Mitochondrial DNA Analysis of Eastern Eurasian Haplogroups Rarely Found in Populations of Northern Asia and Eastern Europe. *PLoS One* 7(2):e32179.
- 9 Derenko M, et al. (2007) Phylogeographic analysis of mitochondrial DNA in northern Asian Populations. *American Journal of Human Genetics* 81(5):1025-1041.
- 10 Duggan AT, et al. (2013) Investigating the Prehistory of Tungusic Peoples of Siberia and the Amur-Ussuri Region with Complete mtDNA Genome Sequences and

Y-chromosomal Markers. PLoS One 8(12).

- 11 Kutanan W, et al. (2016) Complete mitochondrial genomes of Thai and Lao populations indicate an ancient origin of Austroasiatic groups and demic diffusion in the spread of Tai–Kadai languages. *Human genetics*:1-14.
- 12 Vyas DN, et al. (2016) Bayesian analyses of Yemeni mitochondrial genomes suggest multiple migration events with Africa and Western Eurasia. (Translated from eng) *American Journal of Physical Anthropology* 159(3):382-393 (in eng).
- 13 Schonberg A, Theunert C, Li M, Stoneking M, & Nasidze I (2011) High-throughput sequencing of complete human mtDNA genomes from the Caucasus and West Asia: high diversity and demographic inferences. *Eur J Hum Genet* 19(9):988-994.
- 14 Derenko M, et al. (2013) Complete Mitochondrial DNA Diversity in Iranians. *PLoS One* 8(11):e80673.
- 15 Peng M-S, et al. (2017) Mitochondrial genomes uncover the maternal history of the Pamir populations. *Eur. J. Hum. Genet.*
- 16 Pankratov V, et al. (2016) East Eurasian ancestry in the middle of Europe: genetic footprints of Steppe nomads in the genomes of Belarusian Lipka Tatars. *Sci Rep* 6:30197.
- 17 Olivieri A, et al. (2017) Mitogenome Diversity in Sardinians: A Genetic Window onto an Island's Past. *Mol. Biol. Evol.* 34(5):1230-1239.
- 18 Tanaka M, et al. (2004) Mitochondrial Genome Variation in Eastern Asia and the Peopling of Japan. *Genome Research* 14(10a):1832-1850.

Table S3. HVS dataset from previous literature.

| <b>Ethnic group/Population</b> | <b>Location</b>        | <b>Size</b> | <b>Log.</b> | <b>Lat.</b> | <b>Reference</b> |
|--------------------------------|------------------------|-------------|-------------|-------------|------------------|
| <b>Tibet</b>                   |                        | <b>7405</b> |             |             |                  |
| Tibetan                        | Tibet, China           | 156         | 88.90       | 29.46       | (1)              |
| Tibetan                        | Chamdo, China          | 29          | 97.17       | 31.27       | (2)              |
| Tibetan                        | Lhasa, China           | 44          | 91.14       | 29.65       | (2)              |
| Tibetan                        | Nyingchi, China        | 54          | 93.55       | 27.63       | (2)              |
| Tibetan                        | Shigatse, China        | 29          | 88.90       | 29.40       | (2)              |
| Tibetan                        | Shannan, China         | 55          | 95.21       | 28.94       | (2)              |
| Tibetan                        | Nakchu, China          | 5           | 92.04       | 31.64       | (2)              |
| Tibetan                        | Tibet, China           | 73          | 90.07       | 30.13       | (2)              |
| Tibetan                        | Tibet, China           | 6109        | 88.79       | 30.15       | (3)              |
| Tibetan                        | Chamdo, Tibet, China   | 61          | 97.17       | 31.27       | (4)              |
| Tibetan                        | Lhasa, Tibet, China    | 59          | 91.14       | 29.65       | (4)              |
| Tibetan                        | Nagqu, Tibet, China    | 58          | 92.04       | 31.75       | (4)              |
| Tibetan                        | Ngari, Tibet, China    | 46          | 80.10       | 32.68       | (4)              |
| Monba                          | Nyingchi, Tibet, China | 51          | 93.55       | 27.63       | (4)              |
| Tibetan                        | Nyingchi, Tibet, China | 53          | 94.54       | 30.57       | (4)              |
| Lhoba                          | Shannan, Tibet, China  | 20          | 95.21       | 28.94       | (4)              |
| Tibetan                        | Shannan, Tibet, China  | 56          | 92.43       | 27.78       | (4)              |
| Tibetan                        | Shigatse, Tibet, China | 59          | 88.62       | 28.87       | (4)              |
| Tibetan                        | Nakchu, China          | 168         | 92.04       | 31.64       | (5)              |
| Tibetan                        | Rikaze, China          | 220         | 88.90       | 29.40       | (5)              |
| <b>Northwestern China</b>      |                        | <b>1195</b> |             |             |                  |
| Bonan                          | Gansu, China           | 95          | 103.49      | 37.25       | (6)              |

|                    |                                                   |            |        |       |      |
|--------------------|---------------------------------------------------|------------|--------|-------|------|
| Yugur              | Gansu, China                                      | 100        | 103.83 | 36.21 | (7)  |
| Dongxiang          | Gansu, China                                      | 96         | 103.39 | 35.71 | (8)  |
| Salar              | Qinghai, China                                    | 99         | 101.01 | 36.24 | (9)  |
| Han                | Xi'an, China                                      | 85         | 108.94 | 34.29 | (10) |
| Tibetan            | Yushu, Qinghai, China                             | 44         | 97.01  | 33.01 | (4)  |
| Salar              | Jishishan, Linxia, Gansu, China                   | 10         | 103.21 | 35.63 | (11) |
| Dongxiang          | Jishishan, Linxia, Gansu, China                   | 10         | 103.21 | 35.63 | (11) |
| Tibetan            | Qinghai, China                                    | 56         | 101.14 | 36.35 | (12) |
| Han                | Xining, Qinghai (NH), China                       | 44         | 101.78 | 36.63 | (13) |
| Han                | Gansu (NH), China                                 | 45         | 103.86 | 36.51 | (13) |
| Han                | Xi'an, Shaanxi (NH), China                        | 53         | 108.94 | 34.26 | (13) |
| Hui                | Yili, Xinjiang, China                             | 45         | 81.32  | 43.92 | (14) |
| Kazak              | Kashen, Xinjiang, China                           | 53         | 75.99  | 39.49 | (14) |
| Mongoloid          | Yili, Xinjiang, China                             | 49         | 81.29  | 43.99 | (14) |
| Uygur              | Yili/Kashen, Xinjiang, China                      | 47         | 75.95  | 39.47 | (14) |
| Uzbek              | Yili, Xinjiang, China                             | 58         | 81.33  | 43.91 | (14) |
| Han                | Yili, Xinjiang, China                             | 47         | 81.32  | 43.92 | (15) |
| Tibetan            | Qinghai, China                                    | 76         | 101.01 | 37.11 | (5)  |
| Tibetan            | Gannan, Gansu, China                              | 83         | 102.91 | 34.99 | (5)  |
| <b>North China</b> |                                                   | <b>975</b> |        |       |      |
| Mongolian          | Inner Mongolia, China                             | 107        | 111.75 | 40.85 | (16) |
| Mongolian          | Inner Mongolia, China                             | 48         | 116.01 | 42.31 | (16) |
| Barghuts           | Hulun Buir Aimak, Inner Mongolia, China,<br>China | 149        | 119.73 | 49.23 | (17) |
| Daur               | Inner Mongolia, China                             | 45         | 119.03 | 46.18 | (18) |

---

|                    |                               |             |        |       |      |
|--------------------|-------------------------------|-------------|--------|-------|------|
| Ewenki             | Inner Mongolia, China         | 47          | 120.70 | 48.22 | (18) |
| Korean             | Inner Mongolia, China         | 48          | 120.83 | 47.47 | (18) |
| Mongolian          | Inner Mongolia, China         | 48          | 122.10 | 49.43 | (18) |
| Oroqen             | Inner Mongolia, China         | 44          | 121.93 | 50.43 | (18) |
| Han                | Han, Northern China, China    | 60          | 125.50 | 47.13 | (19) |
| Han                | Dalian, Liaoning, China       | 51          | 121.62 | 38.93 | (13) |
| Han                | Chifeng, Neimeng, China       | 45          | 118.89 | 42.29 | (13) |
| Han                | Fengcheng, Liaoning, China    | 51          | 124.07 | 40.50 | (15) |
| Han                | Qingdao, Shandong, China      | 50          | 120.39 | 36.10 | (15) |
| Han                | Tai'an Shandong, China        | 76          | 117.08 | 36.23 | (20) |
| Han                | Yan Bian, Jilin, China        | 51          | 129.51 | 42.91 | (21) |
| Korean             | Yan Bian, Jilin, China        | 55          | 129.51 | 42.90 | (21) |
| <b>South China</b> |                               | <b>3975</b> |        |       |      |
| Han                | Dongguan, Guangdong, China    | 105         | 113.76 | 23.05 | (22) |
| Zhuang             | Fangchenggang, Guangxi, China | 35          | 108.35 | 21.69 | (23) |
| Zhuang             | Liuzhou, Guangxi, China       | 70          | 109.42 | 24.34 | (23) |
| Zhuang             | Baise, Guangxi, China         | 107         | 106.62 | 23.91 | (23) |
| Zhuang             | Nanning, Guangxi, China       | 65          | 108.37 | 22.82 | (23) |
| Li                 | Hainan, China                 | 198         | 110.35 | 20.03 | (23) |
| Han                | Baise, Guangxi, China         | 62          | 106.62 | 23.91 | (23) |
| Han                | Fangchenggang, Guangxi, China | 49          | 101.96 | 30.05 | (23) |
| Han                | Liuzhou, Guangxi, China       | 64          | 109.42 | 24.34 | (23) |
| Han                | Nanning, Guangxi, China       | 47          | 108.37 | 22.82 | (23) |
| Han                | Hainan, China                 | 191         | 110.35 | 20.03 | (23) |
| Bunun              | Taiwan, China                 | 18          | 120.89 | 23.68 | (24) |

---



---

|               |                  |     |        |       |      |
|---------------|------------------|-----|--------|-------|------|
| Atayal        | Taiwan, China    | 18  | 120.96 | 23.45 | (24) |
| Amis          | Taiwan, China    | 21  | 121.34 | 24.59 | (24) |
| Paiwan        | Taiwan, China    | 21  | 120.95 | 24.04 | (24) |
| Han           | Guangdong, China | 69  | 113.31 | 23.49 | (25) |
| Pou           | Guangdong, China | 34  | 112.18 | 23.94 | (26) |
| Caolan        | Guangxi, China   | 30  | 108.35 | 21.79 | (26) |
| Zhuang        | Guangxi, China   | 25  | 106.23 | 24.31 | (26) |
| Zhuang        | Guangxi, China   | 12  | 107.36 | 22.61 | (26) |
| Sui           | Guangxi, China   | 30  | 105.34 | 24.79 | (26) |
| Mulam         | Guangxi, China   | 39  | 108.90 | 24.80 | (26) |
| Maonan        | Guangxi, China   | 32  | 108.25 | 24.84 | (26) |
| Palyu (Gelao) | Guangxi, China   | 30  | 105.34 | 24.78 | (26) |
| Zhuang        | Guangxi, China   | 33  | 109.26 | 25.08 | (26) |
| Yao           | Guangxi, China   | 15  | 105.83 | 23.40 | (26) |
| Dong          | Hubei, China     | 10  | 109.49 | 30.28 | (26) |
| DornQdayc     | Shanghai, China  | 17  | 121.40 | 31.10 | (26) |
| Cun           | Hainan, China    | 30  | 108.65 | 19.11 | (26) |
| Danga         | Hainan, China    | 40  | 110.04 | 18.51 | (26) |
| Hlai-Qi       | Hainan, China    | 34  | 109.52 | 18.78 | (26) |
| Jiamao        | Hainan, China    | 27  | 109.70 | 18.64 | (26) |
| Lingao        | Hainan, China    | 31  | 109.69 | 19.91 | (26) |
| Han           | Shanghai, China  | 120 | 121.48 | 31.28 | (27) |
| Han           | Changsha, China  | 82  | 112.95 | 28.25 | (10) |
| Kam           | Sanjiang, China  | 72  | 109.61 | 25.81 | (28) |
| Laka          | Jinxiu, China    | 67  | 110.19 | 24.16 | (28) |
| Mien          | Fuchuan, China   | 29  | 111.28 | 24.83 | (28) |

---

---

|                                       |                            |     |        |       |      |
|---------------------------------------|----------------------------|-----|--------|-------|------|
| Mulam                                 | Luocheng, China            | 27  | 110.80 | 24.66 | (28) |
| Pinghua_Han                           | Hezhou, China              | 39  | 111.56 | 24.42 | (28) |
| Pinghua_Han                           | Fuchuan, China             | 48  | 111.28 | 24.83 | (28) |
| Pinghua_Han                           | Wuxuan, China              | 111 | 109.66 | 23.61 | (28) |
| Zhuang                                | Hezhou, China              | 54  | 111.56 | 24.42 | (28) |
| Zhuang                                | Luocheng, China            | 4   | 110.80 | 24.66 | (28) |
| Zhuang                                | Jinxiu, China              | 9   | 110.19 | 24.16 | (28) |
| Zhuang                                | Wuxuan, China              | 10  | 109.66 | 23.61 | (28) |
| Philippine descent residing in Taiwan | Taiwan, China              | 64  | 121.01 | 15.12 | (29) |
| Taiwanese                             | Taiwan, China              | 180 | 120.98 | 24.01 | (30) |
| Han                                   | Taiwan, China              | 155 | 120.89 | 23.43 | (31) |
| Mulam                                 | Luocheng, Guangxi, China   | 91  | 108.90 | 24.79 | (32) |
| Han                                   | Chaoshan, Guangdong, China | 102 | 116.63 | 23.67 | (33) |
| Han                                   | Meizhou, Guangdong, China  | 170 | 116.13 | 24.31 | (33) |
| Tujia                                 | Western Hunan, China       | 66  | 109.73 | 28.41 | (12) |
| Tujia                                 | Yongshun, Hunan, China     | 31  | 109.85 | 29.03 | (12) |
| Han                                   | Hefei, Anhui, China        | 42  | 117.22 | 31.86 | (13) |
| Han                                   | Changtin, Fujian, China    | 51  | 116.36 | 25.86 | (13) |
| Han                                   | Tianlin, Guangxi, China    | 26  | 106.23 | 24.33 | (13) |
| Han                                   | Changsha, Hunan, China     | 16  | 112.93 | 28.26 | (13) |
| Han                                   | Nanjing, Jiangsu, China    | 67  | 118.79 | 32.11 | (13) |
| Han                                   | Nanchang, Jiangxi, China   | 23  | 115.86 | 28.72 | (13) |
| Han                                   | Shanghai, China            | 56  | 121.46 | 31.29 | (13) |
| Han                                   | Hangzhou, Zhejiang, China  | 61  | 120.16 | 30.31 | (13) |
| Miao                                  | Jishou, Hunan, China       | 103 | 109.70 | 28.28 | (34) |

---

---

|                        |                                  |             |        |       |      |
|------------------------|----------------------------------|-------------|--------|-------|------|
| Yao                    | Dahua, Guangxi, China            | 19          | 107.97 | 23.77 | (34) |
| Yao                    | Liannan, Guangdong, China        | 35          | 112.29 | 24.74 | (34) |
| Yao                    | Jianghua, Hunan, China           | 24          | 111.59 | 25.21 | (34) |
| Yao                    | Fangcheng, Guangxi, China        | 19          | 108.36 | 21.80 | (34) |
| Yao                    | Fuchuang, Guangxi, China         | 42          | 111.28 | 24.84 | (34) |
| Yao                    | Tianlin, Guangxi, China          | 26          | 106.23 | 24.33 | (34) |
| Yao                    | Tianlin, Guangxi, China          | 6           | 106.13 | 24.21 | (34) |
| Yao                    | Shangsi, Guangxi, China          | 32          | 108.01 | 22.21 | (34) |
| Yao                    | Tianlin, Guangxi, China          | 32          | 106.09 | 24.41 | (34) |
| Yao                    | Hezhou, Guangxi, China           | 41          | 111.57 | 24.42 | (34) |
| Yao                    | Fuchuang, Guangxi, China         | 31          | 111.28 | 24.84 | (34) |
| Yao                    | Fangcheng, Guangxi, China        | 11          | 108.36 | 21.80 | (34) |
| Han                    | Zhanjiang, Guangdong, China      | 30          | 110.36 | 21.29 | (15) |
| Han                    | Wuhan, Hubei, China              | 42          | 114.30 | 30.63 | (15) |
| <b>Southwest China</b> |                                  | <b>2996</b> |        |       |      |
| TH                     | Yunnan, China                    | 46          | 102.76 | 24.13 | (16) |
| Dai                    | Dehong, China                    | 46          | 101.98 | 23.60 | (35) |
| Dai                    | Lancang, China                   | 25          | 99.92  | 22.56 | (35) |
| Dai                    | Xishuangbanna, China             | 30          | 101.98 | 23.60 | (35) |
| Dai                    | Yuanjiang, China                 | 27          | 105.06 | 24.07 | (35) |
| Dai                    | Jianshui, Lincang, Yunnan, China | 85          | 99.39  | 23.57 | (35) |
| Dai                    | Dehong, Yunnan, China            | 51          | 97.92  | 24.29 | (35) |
| Ai-Cham                | Guizhou, China                   | 6           | 107.89 | 25.44 | (26) |
| Qau                    | Guizhou, China                   | 42          | 105.28 | 27.33 | (26) |
| Lolo                   | Guizhou, China                   | 4           | 105.63 | 27.16 | (26) |

---

---

|             |                                              |     |        |       |      |
|-------------|----------------------------------------------|-----|--------|-------|------|
| Mak         | Guizhou, China                               | 33  | 107.89 | 25.42 | (26) |
| Mollao      | Guizhou, China                               | 29  | 107.59 | 26.50 | (26) |
| Red-Gelao   | Guizhou, China                               | 31  | 105.61 | 27.16 | (26) |
| Then        | Guizhou, China                               | 30  | 107.32 | 25.85 | (26) |
| Bugan       | Yunnan, China                                | 32  | 104.67 | 23.45 | (26) |
| Buyang      | Yunnan, China                                | 31  | 105.06 | 24.07 | (26) |
| Dai-lu      | Yunnan, China                                | 56  | 100.80 | 22.05 | (26) |
| Lachi       | Yunnan, China                                | 30  | 104.40 | 23.03 | (26) |
| Pubiao      | Yunnan, China                                | 25  | 104.70 | 23.14 | (26) |
| White-Gelao | Yunnan, China                                | 14  | 104.70 | 23.14 | (26) |
| Lahu        | Simao, Yunnan, China                         | 32  | 100.98 | 22.80 | (36) |
| Tibetan     | Diqing, Yunnan, China                        | 24  | 99.70  | 27.83 | (36) |
| Va          | Simao, Yunnan, China                         | 22  | 102.74 | 25.01 | (36) |
| Dai         | Xishuangbanna, Yunnan, China                 | 21  | 100.78 | 21.99 | (36) |
| Tibetan     | Garze, Western Sichuan, China                | 55  | 101.96 | 30.06 | (4)  |
| Qiang       | Bamei Town, Daofu county, Sichuan, China     | 43  | 101.12 | 30.98 | (37) |
| Qiang       | Danba county, Sichuan, China                 | 47  | 101.89 | 30.88 | (37) |
| Qiang       | Xinlong County of Sichuan, China             | 124 | 99.05  | 32.47 | (37) |
| Qiang       | Hekou Town, Yajiang County of Sichuan, China | 193 | 101.01 | 30.03 | (37) |
| Han         | Yuxi, Yunnan, China                          | 850 | 102.55 | 24.36 | (38) |
| Bai         | Dali, Yunnan, China                          | 40  | 100.27 | 25.62 | (12) |
| Hani        | Xishuangbanna, Yunnan, China                 | 33  | 100.80 | 22.03 | (12) |
| Lahu        | Xishuangbanna, Yunnan, China                 | 15  | 99.94  | 22.60 | (12) |
| Naxi        | Lijiang, Yunnan, China                       | 45  | 100.23 | 26.88 | (12) |
| Pumi        | Ninglang, Yunnan, China                      | 35  | 100.86 | 27.32 | (12) |

---

|                   |                                        |             |        |       |      |
|-------------------|----------------------------------------|-------------|--------|-------|------|
| Tibetan           | Zhongdian, Yunnan, China               | 35          | 103.23 | 25.23 | (12) |
| Yi                | Xishuangbanna, Yunnan, China           | 56          | 101.64 | 27.71 | (12) |
| Aini              | Xishuangbanna, Yunnan, China           | 47          | 100.64 | 22.12 | (12) |
| Bai               | Xishuangbanna, Yunnan, China           | 19          | 100.88 | 21.87 | (12) |
| Jino              | Xishuangbanna, Yunnan, China           | 18          | 101.32 | 21.73 | (12) |
| Han               | Weicheng, Sichuan (SH), China          | 70          | 104.96 | 31.55 | (13) |
| Han               | Huize, Yunnan (SH), China              | 58          | 103.29 | 26.47 | (13) |
| Miao              | Wenshan, Yunnan (Hmong), China         | 39          | 104.25 | 23.38 | (34) |
| Yao               | Mengla, Yunnan (Mien), China           | 10          | 101.58 | 21.50 | (34) |
| Yao               | Malipo, Yunnan (Mien), China           | 40          | 104.69 | 23.14 | (34) |
| Yao               | Mengla, Yunnan (Mien), China           | 27          | 101.58 | 21.50 | (34) |
| Tibetan           | Deqian, Diqing, Yunnan; Qinghai, China | 40          | 99.70  | 27.83 | (39) |
| Lahu              | Lancang, Yunnan, China                 | 35          | 99.94  | 22.59 | (40) |
| Va                | Ximeng and Gengma, Yunnan, China       | 36          | 102.74 | 25.01 | (40) |
| Han               | Kunming, Yunnan, China                 | 43          | 102.72 | 25.06 | (15) |
| Dai               | Xishuangbanna, Yunnan, China           | 38          | 100.60 | 22.00 | (39) |
| Tibetan           | Diqing, Yunnan, China                  | 71          | 99.70  | 27.82 | (5)  |
| Tibetan           | Liangshan, Sichuan, China              | 62          | 102.27 | 27.89 | (5)  |
| <b>North Asia</b> |                                        | <b>4451</b> |        |       |      |
| Ba                | Bashkir                                | 221         | 56.15  | 54.32 | (41) |
| Ch                | Chuvash                                | 55          | 46.93  | 55.71 | (41) |
| Er                | Erza-Moksha                            | 102         | 50.47  | 53.01 | (41) |
| Ko                | Komi                                   | 138         | 52.60  | 62.89 | (41) |
| Ma                | Mari                                   | 139         | 48.12  | 56.68 | (41) |
| Ta                | Tatar                                  | 228         | 50.71  | 55.54 | (41) |

---

|            |                                 |     |        |       |      |
|------------|---------------------------------|-----|--------|-------|------|
| Ud         | Udmurt                          | 102 | 57.00  | 55.94 | (41) |
| Kets       | Sulomai and Turukhansk          | 38  | 81.70  | 70.71 | (42) |
| Ngana-sans | Dudinka                         | 24  | 82.00  | 70.19 | (42) |
| Mansi      | Northwest Siberia               | 98  | 61.40  | 60.63 | (43) |
| Even       | Even                            | 65  | 159.50 | 57.56 | (44) |
| Koryak     | Koryak                          | 35  | 164.40 | 64.26 | (44) |
| Yakutian   | Yakut                           | 22  | 129.73 | 62.04 | (44) |
| Buryat     | South Siberia                   | 40  | 112.81 | 54.39 | (45) |
| Tuvinian   | South Siberia                   | 36  | 95.59  | 52.15 | (45) |
| Altaiian   | South Siberia                   | 110 | 86.10  | 50.99 | (46) |
| Khakassian | South Siberia                   | 53  | 87.50  | 54.91 | (46) |
| Buryat     | South Siberia                   | 91  | 110.50 | 53.38 | (46) |
| Sojot      | South Siberia                   | 30  | 105.90 | 56.58 | (46) |
| Todjin     | South Siberia                   | 48  | 96.60  | 53.28 | (46) |
| Tuvinian   | South Siberia                   | 90  | 95.40  | 51.75 | (46) |
| Tofalar    | South Siberia                   | 58  | 97.73  | 54.62 | (46) |
| Yakut      | Northeastern Siberia            | 191 | 129.76 | 62.06 | (47) |
| Mongoloid  | Mongolian                       | 46  | 102.77 | 50.00 | (48) |
| AEG        | Mongolia                        | 39  | 103.52 | 49.87 | (49) |
| PDEG       | Mongolia                        | 124 | 103.44 | 49.51 | (49) |
| PDM        | Mongolia                        | 104 | 102.56 | 49.02 | (49) |
| PDY        | Mongolia                        | 44  | 103.74 | 48.76 | (49) |
| Mongoloid  | Mongolia                        | 103 | 101.62 | 45.72 | (50) |
| Russian    | North-Eastern Siberia           | 50  | 150.77 | 59.71 | (51) |
| Ukrainian  | North-Eastern Siberia           | 18  | 150.66 | 59.86 | (51) |
| Buryat     | Ulan-Ude, South-Central Siberia | 126 | 107.63 | 51.97 | (52) |

---

---

|         |                                |     |         |       |      |
|---------|--------------------------------|-----|---------|-------|------|
| Yakut   | Yakutsk, northeastern Siberia  | 117 | 129.73  | 62.04 | (52) |
| Khanty  | Lower Ob-River Valley, Siberia | 106 | 66.69   | 66.23 | (53) |
| Mansi   | Lower Ob-River Valley, Siberia | 63  | 67.70   | 66.83 | (53) |
| TB      | Southern Siberia               | 72  | 88.75   | 51.84 | (54) |
| TV      | Southern Siberia               | 96  | 91.00   | 51.23 | (54) |
| BR      | Southern Siberia               | 25  | 99.19   | 54.65 | (54) |
| TF      | Southern Siberia               | 46  | 96.98   | 54.64 | (54) |
| EV      | Southern Siberia               | 37  | 94.68   | 62.00 | (54) |
| NG      | Southern Siberia               | 33  | 60.60   | 59.15 | (54) |
| UL      | Southern Siberia               | 87  | 134.85  | 51.14 | (54) |
| NV      | Southern Siberia               | 56  | 135.23  | 48.35 | (54) |
| UD      | Southern Siberia               | 46  | 136.12  | 47.87 | (54) |
| Tubalar | Altai region, Siberia          | 144 | 86.22   | 50.62 | (55) |
| Evens   | NE Siberia, Siberia            | 87  | 140.46  | 64.98 | (55) |
| Ulchi   | Lower Amur R., Siberia         | 160 | 138.52  | 52.71 | (55) |
| Buryat  | Buryat, Buryat                 | 61  | 107.90  | 54.70 | (19) |
| Even    | Even, Siberia                  | 35  | 159.65  | 55.39 | (19) |
| Nga     | Arctic Siberians               | 39  | 94.50   | 71.26 | (56) |
| Ind     | Arctic Siberians               | 82  | 146.73  | 69.47 | (56) |
| Kolyma  | Arctic Siberians               | 18  | 151.26  | 65.76 | (56) |
| Chv     | Arctic Siberians               | 32  | 170.41  | 64.67 | (56) |
| Chu     | Arctic Siberians               | 182 | 171.80  | 66.70 | (56) |
| Sir     | Arctic Siberians               | 34  | -173.96 | 64.45 | (56) |
| Cha     | Arctic Siberians               | 50  | -172.26 | 64.41 | (56) |
| Nau     | Arctic Siberians               | 39  | -171.02 | 65.60 | (56) |
| Ale     | Arctic Siberians               | 36  | 166.03  | 55.24 | (56) |

---

---

| <b>Southeast Asia</b> |                        | <b>8040</b> |        |       |      |
|-----------------------|------------------------|-------------|--------|-------|------|
| Burmans               | Sagaing, Myanmar       | 32          | 95.43  | 21.83 | (57) |
| Burmans               | Sagaing, Myanmar       | 54          | 94.05  | 23.36 | (57) |
| Burmans               | Sagaing, Myanmar       | 51          | 94.56  | 23.84 | (57) |
| Burmans               | Magway, Myanmar        | 122         | 94.58  | 20.56 | (57) |
| Burmans               | Bago, Myanmar          | 69          | 95.74  | 17.78 | (57) |
| Burmans               | Ayeyarwady, Myanmar    | 72          | 95.25  | 18.35 | (57) |
| Chin                  | Chin, Myanmar          | 58          | 93.69  | 23.48 | (57) |
| Chin                  | Magway, Myanmar        | 187         | 94.26  | 20.15 | (57) |
| Chin                  | Chin, Myanmar          | 13          | 93.45  | 21.56 | (57) |
| Naga                  | Sagaing, Myanmar       | 30          | 94.92  | 25.50 | (57) |
| Naga                  | Sagaing, Myanmar       | 39          | 94.98  | 25.18 | (57) |
| Naga                  | Sagaing, Myanmar       | 32          | 95.30  | 25.90 | (57) |
| Rakhine               | Magway, Myanmar        | 24          | 94.10  | 21.70 | (57) |
| Rakhine               | Rakhine, Myanmar       | 63          | 94.78  | 18.69 | (57) |
| Akha                  | Chiang Rai, Thailand   | 91          | 99.72  | 19.91 | (58) |
| Lahu                  | Chiang Mai, Thailand   | 39          | 99.72  | 19.91 | (58) |
| Lisu                  | Chiang Mai, Thailand   | 25          | 99.72  | 19.91 | (58) |
| Lisu                  | Chiang Rai, Thailand   | 42          | 99.72  | 19.91 | (58) |
| Lisu                  | Mae Hong Son, Thailand | 53          | 97.87  | 18.78 | (58) |
| Mussur                | Chiang Mai, Thailand   | 21          | 99.72  | 19.91 | (58) |
| Vietnamese            | Hanoi area, Vietnam    | 187         | 105.83 | 21.04 | (59) |
| Cham                  | Vietnam, Vietnam       | 168         | 108.14 | 11.26 | (60) |
| Kinh                  | Vietnam, Vietnam       | 139         | 105.83 | 21.06 | (60) |
| Thai                  | Chiang Mai, Thailand   | 190         | 99.72  | 19.91 | (61) |

---



---

|              |                                   |    |        |       |      |
|--------------|-----------------------------------|----|--------|-------|------|
| Thai         | North Thailand                    | 32 | 99.58  | 19.61 | (39) |
| Cambodia     | Northwest Cambodia                | 31 | 104.06 | 13.91 | (62) |
| Thai         | Chiang Mai, Thailand              | 30 | 99.72  | 19.91 | (63) |
| Thai         | Khon Kaen, Thailand               | 44 | 102.62 | 16.04 | (63) |
| Lao Song     | Chiang Rai/Mae Hong Son, Thailand | 25 | 97.87  | 18.78 | (63) |
| ChB          | Nakhon Ratchasima, Thailand       | 20 | 102.25 | 14.93 | (64) |
| Khm          | Nakhon Ratchasima, Thailand       | 22 | 102.25 | 14.93 | (64) |
| Th_K         | Nakhon Ratchasima, Thailand       | 32 | 102.25 | 14.93 | (64) |
| Phuthai      | Nakhon Pathom, Thailand           | 25 | 100.17 | 13.99 | (63) |
| Chong        | Chanthaburi, Thailand             | 25 | 102.16 | 12.82 | (63) |
| Java         | Java                              | 46 | 110.70 | -7.36 | (24) |
| Banjarmasin  | Banjumas, Indonesian              | 89 | 114.59 | -3.33 | (24) |
| Borneo       | Borneo, Malaysia                  | 61 | 116.12 | 5.98  | (24) |
| Manado       | Sulawesi, Indonesian              | 89 | 124.85 | 1.51  | (24) |
| Palu         | Sulawesi, Indonesian              | 38 | 119.85 | -0.88 | (24) |
| Ujung Padang | Sulawesi, Indonesian              | 46 | 99.45  | 3.02  | (24) |
| Toraja       | Sulawesi, Indonesian              | 64 | 120.04 | -2.87 | (24) |
| Bali         | Balinese, Indonesian              | 82 | 115.21 | -8.34 | (24) |
| Mataram      | Mataram, Indonesian               | 44 | 116.12 | -8.58 | (24) |
| Flores       | Flores, Indonesian                | 2  | 121.10 | -8.58 | (24) |
| Waingapu     | Sumba, Indonesian                 | 50 | 120.02 | -9.58 | (24) |
| Alor         | Alor, Malaysia                    | 45 | 100.37 | 6.13  | (24) |
| Ambon        | Ambon, Indonesian                 | 43 | 128.17 | -3.64 | (24) |
| Bangka       | Indonesian/Sumatrans              | 34 | 101.32 | 0.02  | (65) |
| Batek        | Indonesian/Sumatrans              | 45 | 101.96 | 5.62  | (65) |
| Jahai        | Indonesian/Sumatrans              | 39 | 101.37 | 5.73  | (65) |

---

---

|                   |                             |     |        |        |      |
|-------------------|-----------------------------|-----|--------|--------|------|
| Medan             | Indonesian/Sumatrans        | 42  | 98.67  | 3.64   | (65) |
| Melayu            | Indonesian/Sumatrans        | 6   | 114.49 | -8.24  | (65) |
| Mendriq           | Indonesian/Sumatrans        | 31  | 102.03 | 5.23   | (65) |
| Padang            | Indonesian/Sumatrans        | 24  | 100.39 | -0.921 | (65) |
| Palembang         | Indonesian/Sumatrans        | 50  | 104.76 | -2.98  | (65) |
| Pekanbaru         | Indonesian/Sumatrans        | 52  | 101.45 | 0.57   | (65) |
| Semai             | Senoi, Malaysia             | 6   | 101.02 | 4.67   | (65) |
| Semelai           | Aboriginal Malay, Malaysia  | 61  | 102.40 | 3.44   | (65) |
| Temiar            | Senoi, Malaysia             | 46  | 100.83 | 5.41   | (65) |
| Temuan            | Aboriginal Malay, Malaysia  | 33  | 101.67 | 3.57   | (65) |
| Philippines       | Philippine                  | 61  | 121.35 | 17.39  | (24) |
| Philippine        | Philippine                  | 29  | 122.94 | 12.68  | (19) |
| Philippine        | Philippine                  | 30  | 121.03 | 16.13  | (19) |
| Malaysian-MAL     | Malaysian                   | 52  | 101.69 | 3.15   | (19) |
| Indonesian        | Indonesian                  | 54  | 111.00 | -0.60  | (19) |
| Luzon             | National Capital Philippine | 168 | 121.32 | 16.85  | (29) |
| Visayas           | Cebu Philippine             | 103 | 121.04 | 14.66  | (29) |
| Mindanao          | Zamboanga Philippine        | 70  | 122.90 | 7.96   | (29) |
| Mal               | Kuala Lumpur, Malaysia      | 124 | 101.69 | 3.13   | (66) |
| Aita              | Bougainville                | 54  | 155.08 | -5.90  | (67) |
| An ên             | New Britain                 | 19  | 155.08 | -5.45  | (67) |
| Ata               | New Britain                 | 58  | 155.08 | -5.64  | (67) |
| Buka              | Bougainville                | 15  | 155.08 | -5.25  | (67) |
| Eastern Highlands | New Guinea                  | 4   | 155.08 | -6.08  | (67) |
| Eivo              | Bougainville                | 19  | 155.08 | -6.18  | (67) |
| Fiji              | Fiji                        | 15  | 155.08 | -18.00 | (67) |

---

---

|                  |                 |     |        |       |      |
|------------------|-----------------|-----|--------|-------|------|
| Fringe Highlands | New Guinea      | 18  | 155.08 | -5.73 | (67) |
| Kaket (Baining)  | New Britain     | 59  | 155.08 | -4.50 | (67) |
| Kol              | New Britain     | 57  | 155.08 | -5.38 | (67) |
| Kove             | New Britain     | 20  | 155.08 | -5.47 | (67) |
| Kuot             | New Ireland     | 62  | 155.08 | -3.03 | (67) |
| Lavongai         | New Hanover     | 18  | 155.08 | -2.50 | (67) |
| Lowland Riverine | New Guinea      | 27  | 155.08 | -8.50 | (67) |
| Madak            | New Ireland     | 31  | 155.08 | -3.10 | (67) |
| Malaita - Baegu  | Solomon Islands | 134 | 155.08 | -8.78 | (67) |
| Malaita - Kwaio  | Solomon Islands | 54  | 155.08 | -8.78 | (67) |
| Malaita -Lau     | Solomon Islands | 57  | 155.08 | 4.00  | (67) |
| Mali (Baining)   | New Britain     | 58  | 155.08 | -4.63 | (67) |
| Mamusi           | New Britain     | 63  | 155.08 | -5.80 | (67) |
| Mangseng         | New Britain     | 17  | 155.08 | -5.93 | (67) |
| Manus            | Manus           | 2   | 155.08 | -1.86 | (67) |
| Markham          | New Guinea      | 67  | 155.08 | -6.73 | (67) |
| Melamela         | New Britain     | 23  | 155.08 | -5.00 | (67) |
| Mengen           | New Britain     | 23  | 155.08 | -5.10 | (67) |
| Micronesia       | Micronesia      | 47  | 155.08 | -2.71 | (67) |
| Misima           | PNG Island      | 7   | 155.08 | 5.79  | (67) |
| Morobe Highlands | New Guinea      | 20  | 155.08 | -7.75 | (67) |
| Mussau           | Mussau          | 16  | 155.08 | -1.58 | (67) |
| Nagovisi         | Bougainville    | 16  | 155.08 | -6.43 | (67) |
| Nakanai          | New Britain     | 64  | 155.08 | -5.75 | (67) |
| Nakanai (Loso)   | New Britain     | 17  | 155.08 | -5.48 | (67) |
| Nalik            | New Ireland     | 24  | 155.08 | -2.98 | (67) |

---

---

|                    |                       |     |        |        |      |
|--------------------|-----------------------|-----|--------|--------|------|
| Nasioi             | Bougainville          | 33  | 155.08 | -6.48  | (67) |
| New Caledonia      | New Caledonia         | 25  | 155.08 | -22.00 | (67) |
| North Coast        | New Guinea            | 14  | 155.08 | -3.58  | (67) |
| Notsi              | New Ireland           | 23  | 155.08 | -3.05  | (67) |
| Rigo               | New Guinea            | 18  | 155.08 | -9.80  | (67) |
| Rossel             | PNG Island            | 5   | 155.08 | 25.00  | (67) |
| Rotokas            | Bougainville          | 19  | 155.08 | -6.18  | (67) |
| Saposa             | Bougainville          | 25  | 155.08 | -5.58  | (67) |
| Simeku             | Bougainville          | 7   | 155.08 | -6.18  | (67) |
| Siwai              | Bougainville          | 19  | 155.08 | -6.67  | (67) |
| Solomon Islands    | Solomon Islands       | 69  | 155.08 | 159.15 | (67) |
| Solomons           | Solomon Islands       | 28  | 155.08 | 159.21 | (67) |
| Southwest Riverine | New Guinea            | 33  | 155.08 | 141.60 | (67) |
| Sulka              | New Britain           | 28  | 155.08 | -4.89  | (67) |
| Teop               | Bougainville          | 20  | 155.08 | -5.85  | (67) |
| Tigak              | New Ireland           | 27  | 155.08 | -2.60  | (67) |
| Tolai              | New Britain           | 78  | 155.08 | -4.34  | (67) |
| Torau              | Bougainville          | 46  | 155.08 | -6.17  | (67) |
| Vanuatu            | Vanuatu               | 23  | 155.08 | -16.00 | (67) |
| Western Highlands  | New Guinea            | 18  | 155.08 | -5.90  | (67) |
| HA                 | Singapore             | 205 | 103.78 | 1.37   | (68) |
| Sakai              | Trang Thailand        | 20  | 99.61  | 7.70   | (63) |
| Mussur             | Chiang Mai Thailand   | 21  | 98.69  | 19.05  | (63) |
| White Karen        | Mae Hong Son Thailand | 40  | 97.88  | 18.77  | (58) |
| Red Karen          | Mae Hong Son Thailand | 39  | 97.91  | 18.85  | (58) |
| BK                 | Northeast Thailand    | 13  | 102.35 | 17.53  | (64) |

---

---

|                |                                        |     |        |       |      |
|----------------|----------------------------------------|-----|--------|-------|------|
| NUL            | Northeast Thailand                     | 17  | 103.00 | 17.57 | (64) |
| Benu           | Benut, Johor, Malaysia                 | 10  | 103.30 | 1.68  | (69) |
| Gopeng         | Gopeng, Perak, Malaysia                | 22  | 101.17 | 4.46  | (69) |
| Kuala Kurau    | Kuala Kurau, Perak, Malaysia           | 17  | 100.41 | 5.03  | (69) |
| Lembah Bujang  | Lembah Bujang, Kedah, Malaysia         | 26  | 100.59 | 5.91  | (69) |
| Lenggeng       | Lenggeng, Negeri Sembilan, Malaysia    | 12  | 101.93 | 2.89  | (69) |
| Machang        | Machang, Kelantan, Malaysia            | 24  | 102.22 | 5.77  | (69) |
| Kota Bharu     | Kota Bharu, Kelantan, Malaysia         | 5   | 102.25 | 6.13  | (69) |
| Muar           | Muar, Johor, Malaysia                  | 17  | 102.57 | 2.04  | (69) |
| Parit Buntar   | Parit Buntar, Perak, Malaysia          | 16  | 100.48 | 5.11  | (69) |
| Parit Buntar   | Parit Buntar, Perak, Malaysia          | 1   | 100.49 | 5.11  | (69) |
| Pontian        | Pontian, Johor, Malaysia               | 20  | 103.40 | 1.49  | (69) |
| Rantau Panjang | Rantau Panjang, Kelantan, Malaysia     | 32  | 101.98 | 6.02  | (69) |
| Semerah        | Semerah, Johor, Malaysia               | 13  | 102.77 | 1.89  | (69) |
| Sri Menanti    | Sri Menanti, Negeri Sembilan, Malaysia | 22  | 102.16 | 2.71  | (69) |
| Yan            | Yan, Kedah, Malaysia                   | 11  | 100.39 | 5.84  | (69) |
| Moor           | Sri Lanka                              | 43  | 80.97  | 6.89  | (70) |
| Sinhalese      | Sri Lanka                              | 59  | 80.44  | 7.46  | (70) |
| Laos           | Laos                                   | 214 | 102.61 | 19.86 | (71) |
| Brao           | Cambodia                               | 123 | 106.85 | 13.92 | (72) |
| Jarai          | Cambodia                               | 102 | 107.24 | 13.44 | (72) |
| Kachac         | Cambodia                               | 33  | 107.23 | 14.02 | (72) |
| Khmer          | Cambodia                               | 80  | 106.22 | 12.43 | (72) |
| Kravet         | Cambodia                               | 71  | 106.74 | 13.86 | (72) |
| Kreung         | Cambodia                               | 46  | 106.77 | 13.96 | (72) |
| Kuy            | Cambodia                               | 137 | 105.62 | 13.32 | (72) |

---

---

|                     |                          |             |        |       |      |
|---------------------|--------------------------|-------------|--------|-------|------|
| Lao                 | Cambodia                 | 91          | 106.05 | 13.34 | (72) |
| Lun                 | Cambodia                 | 38          | 106.95 | 13.91 | (72) |
| Mel                 | Cambodia                 | 107         | 105.77 | 12.72 | (72) |
| Phnong              | Cambodia                 | 63          | 105.87 | 12.81 | (72) |
| Stieng              | Cambodia                 | 50          | 106.39 | 11.96 | (72) |
| Tompuon             | Cambodia                 | 111         | 107.35 | 13.55 | (72) |
| Kraol               | Cambodia                 | 2           | 106.33 | 12.46 | (72) |
| Myanmar             | Myanmar                  | 327         | 96.06  | 21.89 | (73) |
| Batak               | Philippine               | 31          | 118.65 | 9.97  | (74) |
| Palawan Non-Negrito | Philippine               | 20          | 118.65 | 9.97  | (74) |
| <b>South Asia</b>   |                          | <b>6760</b> |        |       |      |
| Adi                 | Assam, India             | 45          | 92.92  | 26.30 | (75) |
| Apatani             | Arunachal Pradesh, India | 26          | 94.06  | 28.31 | (75) |
| Apatani             | Tripura, India           | 21          | 91.99  | 23.99 | (75) |
| Naga                | Nagaland, India          | 43          | 94.72  | 26.19 | (75) |
| Nishi               | Tripura, India           | 44          | 91.99  | 23.99 | (75) |
| Tipperah            | Tripura, India           | 20          | 91.99  | 23.99 | (76) |
| Garo                | Meghalaya, India         | 76          | 90.55  | 25.58 | (77) |
| Lyngnga             | Meghalaya, India         | 74          | 90.92  | 25.38 | (77) |
| Nongtraï            | Meghalaya, India         | 27          | 91.13  | 25.85 | (77) |
| Maram               | Meghalaya, India         | 60          | 91.23  | 25.50 | (77) |
| Bhoi                | Meghalaya, India         | 29          | 91.75  | 25.96 | (77) |
| Khynriam            | Meghalaya, India         | 82          | 91.79  | 25.54 | (77) |
| War_Khas            | Meghalaya, India         | 29          | 91.94  | 25.21 | (77) |
| Pnar                | Meghalaya, India         | 51          | 92.31  | 25.47 | (77) |

---

---

|                                         |                                                           |     |       |         |          |
|-----------------------------------------|-----------------------------------------------------------|-----|-------|---------|----------|
| War_Jaint                               | Meghlaya, India                                           | 17  | 92.32 | 25.20   | (77)     |
| Pakistania                              | Southeast Pakistan                                        | 100 | 67.04 | 25.96   | (78)     |
| Baluch                                  | Baluchistan, Southwestern Pakistan                        | 39  | 67.59 | 30.39   | (78)     |
| Brahui                                  | Baluchistan, Southwestern Pakistan                        | 38  | 62.47 | 29.06   | (78)     |
| Gujarati                                | Gujarat, Northwestern India                               | 34  | 69.35 | 25.15   | (78)     |
| Hazara                                  | North West Frontier Province and<br>Balochistan, Pakistan | 23  | 71.93 | 33.38 7 | (78)     |
| Hunza Burusho                           | Karakorum Mountains, Northern Pakistan                    | 44  | 76.27 | 35.25   | (78)     |
| Kalash                                  | North West Frontier Province, Pakistan                    | 44  | 72.54 | 36.30   | (78)     |
| Makrani                                 | Makran Coast, South Pakistan                              | 33  | 63.30 | 26.40   | (78)     |
| Parsi                                   | Karachi, Southeastern Pakistan                            | 44  | 69.00 | 26.20   | (78)     |
| Pathan                                  | North West Frontier Province and<br>Balochistan, Pakistan | 44  | 74.56 | 32.39   | (78)     |
| Sindhi                                  | Sindh, Southeastern Pakistan                              | 23  | 71.74 | 29.35   | (78)     |
| Ha, S, SHC, SST, SR, TA,<br>Tamil nadu, | Tamil Nadu, India                                         | 74  | 79.26 | 11.61   | (79-81)  |
| Baduga (Bad)                            | Tamil Nadu, India                                         | 2   | 78.62 | 11.45   | (81)     |
| Irula, Ir                               | Tamil Nadu, India                                         | 16  | 78.63 | 11.03   | (76, 81) |
| Kota                                    | Tamil Nadu, India                                         | 25  | 78.48 | 11.44   | (75)     |
| Kurumba                                 | Tamil Nadu, India                                         | 8   | 78.11 | 11.75   | (75)     |
| Kurumba Betta                           | Tamil Nadu, India                                         | 19  | 79.17 | 11.96   | (75)     |
| Kurumba Mulla, Mulla<br>Krumba          | Tamil Nadu, India                                         | 15  | 79.26 | 11.61   | (75)     |
| Oorali (Oo)                             | Tamil Nadu, India                                         | 3   | 79.43 | 11.20   | (81)     |
| Sakkili (Sak)                           | Tamil Nadu, India                                         | 6   | 78.85 | 11.19   | (81)     |
| Soligas                                 | Tamil Nadu, India                                         | 12  | 78.74 | 12.03   | (75)     |

---

---

|                      |                       |    |       |       |              |
|----------------------|-----------------------|----|-------|-------|--------------|
| Kadar                | Kerala, India         | 7  | 76.46 | 10.75 | (82)         |
| Malayalam (ML)       | Kerala, India         | 3  | 76.73 | 9.75  | (80)         |
| Cochin               | Kerala, India         | 52 | 77.40 | 9.24  | (70)         |
| Cochin Jews          | Kerala, India         | 37 | 76.72 | 9.33  | (70)         |
| Kattunaiken          | Kerala, India         | 16 | 76.85 | 8.95  | (75)         |
| Kuruchian            | Kerala, India         | 46 | 76.67 | 9.93  | (75)         |
| Kuruman Mullu, Mullu | Kerala, India         | 37 | 76.50 | 10.29 | (75)         |
| Kurunan              | Kerala, India         | 37 | 76.50 | 10.29 | (75)         |
| Paniya               | Kerala, India         | 11 | 76.16 | 11.10 | (75)         |
| Havik                | Karnataka, India      | 38 | 75.72 | 15.58 | (82)         |
| Mukri                | Karnataka, India      | 42 | 75.57 | 14.91 | (82)         |
| Kannada (KA)         | Karnataka, India      | 5  | 75.99 | 14.26 | (80)         |
| Koragas              | Karnataka, India      | 31 | 75.95 | 13.70 | (75)         |
| Kuruva               | Karnataka, India      | 25 | 77.03 | 13.19 | (83)         |
| Kurumba Jenu         | Karnataka, India      | 6  | 76.40 | 12.64 | (75)         |
| Yerava               | Karnataka, India      | 53 | 76.10 | 13.21 | (75)         |
| Bhovi                | Karnataka, India      | 30 | 77.01 | 13.56 | (84)         |
| Gowda                | Karnataka, India      | 37 | 76.16 | 14.51 | (84)         |
| Brahmin              | Karnataka, India      | 29 | 75.34 | 14.35 | (84)         |
| Lingayat             | Karnataka, India      | 17 | 76.22 | 13.94 | (84)         |
| Christians           | Karnataka, India      | 21 | 76.09 | 13.38 | (83)         |
| Muslim               | Karnataka, India      | 24 | 75.00 | 13.85 | (83)         |
| Siddi                | Andhra Pradesh, India | 7  | 79.88 | 17.33 | (85)         |
| Telugu               | Andhra Pradesh, India | 15 | 80.49 | 17.03 | (80, 86, 87) |
| Lambadi              | Andhra Pradesh, India | 75 | 80.29 | 17.30 | (86)         |
| Andh, AndhSA, AndhX  | Andhra Pradesh, India | 95 | 80.00 | 17.69 | (88)         |

---



---

|              |                       |     |       |       |          |
|--------------|-----------------------|-----|-------|-------|----------|
| Brahmin      | Andhra Pradesh, India | 34  | 79.42 | 17.41 | (86)     |
| Kapu         | Andhra Pradesh, India | 67  | 79.37 | 16.74 | (86, 89) |
| Madiga       | Andhra Pradesh, India | 24  | 80.27 | 15.90 | (86)     |
| Yadava       | Andhra Pradesh, India | 40  | 79.76 | 16.01 | (86)     |
| Wadabahija   | Andhra Pradesh, India | 8   | 81.69 | 17.05 | (86)     |
| Mala         | Andhra Pradesh, India | 23  | 79.13 | 17.66 | (86)     |
| Kshatriya    | Andhra Pradesh, India | 9   | 78.76 | 17.15 | (86)     |
| Relli        | Andhra Pradesh, India | 20  | 78.37 | 17.35 | (86)     |
| Jalari       | Andhra Pradesh, India | 7   | 78.82 | 18.23 | (86)     |
| Vysya        | Andhra Pradesh, India | 9   | 77.99 | 16.14 | (86)     |
| Chenchu      | Andhra Pradesh, India | 96  | 78.05 | 16.68 | (90)     |
| Koya         | Andhra Pradesh, India | 81  | 79.07 | 18.28 | (90)     |
| Erukula(Er)  | Andhra Pradesh, India | 5   | 78.38 | 18.90 | (81)     |
| Yanadi(Yn)   | Andhra Pradesh, India | 10  | 79.22 | 15.89 | (81)     |
| Pardhi       | Andhra Pradesh, India | 38  | 78.37 | 17.35 | (75)     |
| Thoti        | Andhra Pradesh, India | 39  | 78.82 | 18.23 | (75)     |
| Akhutota(AK) | Andhra Pradesh, India | 22  | 77.99 | 16.14 | (89)     |
| Panta(PK)    | Andhra Pradesh, India | 29  | 78.05 | 16.68 | (89)     |
| Pokanati(PO) | Andhra Pradesh, India | 36  | 79.07 | 18.28 | (89)     |
| Vanne(VN)    | Andhra Pradesh, India | 26  | 78.38 | 18.90 | (89)     |
| Irula        | Andhra Pradesh, India | 19  | 79.22 | 15.89 | (91)     |
| Chenchu      | Andhra Pradesh, India | 75  | 78.05 | 16.68 | (92)     |
| Kolam        | Andhra Pradesh, India | 128 | 79.07 | 18.28 | (92)     |
| Gond         | Andhra Pradesh, India | 75  | 78.38 | 18.90 | (92)     |
| Naikpod      | Andhra Pradesh, India | 83  | 79.37 | 16.74 | (88)     |
| Pardhan      | Andhra Pradesh, India | 170 | 80.27 | 15.90 | (88)     |

---

|                      |                    |    |       |       |          |
|----------------------|--------------------|----|-------|-------|----------|
| Chitpavan Brahmin    | Maharashtra, India | 17 | 75.66 | 20.05 | (93)     |
| Desasth Brahmin      | Maharashtra, India | 15 | 75.30 | 19.38 | (93)     |
| Brahmin              | Maharashtra, India | 9  | 76.54 | 20.19 | (94)     |
| Konkanastha Brahmin  | Maharashtra, India | 50 | 77.64 | 20.43 | (70)     |
| Dhangar              | Maharashtra, India | 16 | 76.54 | 20.43 | (93)     |
| Maratha              | Maharashtra, India | 30 | 75.50 | 20.48 | (93-95)  |
| Maharashtra, Marathi | Maharashtra, India | 29 | 76.22 | 18.75 | (80, 86) |
| Nav-Baudh            | Maharashtra, India | 17 | 76.35 | 19.17 | (94, 95) |
| Parsi                | Maharashtra, India | 37 | 76.54 | 20.19 | (70)     |
| Bohra                | Maharashtra, India | 5  | 77.64 | 20.43 | (95)     |
| Irani                | Maharashtra, India | 5  | 76.54 | 20.43 | (95)     |
| Korku                | Maharashtra, India | 9  | 75.50 | 20.48 | (95)     |
| Madia Gond           | Maharashtra, India | 13 | 76.22 | 18.75 | (95)     |
| Kolam                | Maharashtra, India | 8  | 76.35 | 19.17 | (95)     |
| Kathodi (Ka)         | Gujarat, India     | 1  | 71.18 | 22.58 | (81)     |
| Koli (Ko)            | Gujarat, India     | 6  | 70.92 | 21.99 | (81)     |
| Gujarat (Guj, GJ)    | Gujarat, India     | 61 | 70.65 | 22.33 | (70, 78) |
| Brahmin              | Punjab, India      | 29 | 72.67 | 31.44 | (96)     |
| Khatri               | Punjab, India      | 11 | 72.96 | 30.90 | (96)     |
| Jat Singh            | Punjab, India      | 27 | 72.67 | 31.28 | (70, 96) |
| Sikh                 | Punjab, India      | 23 | 72.89 | 31.14 | (75)     |
| Scheduled caste      | Punjab, India      | 19 | 73.10 | 31.31 | (70, 96) |
| Lobana               | Punjab, India      | 49 | 73.11 | 31.52 | (86)     |
| Brahmin (Puj)        | Punjab, India      | 18 | 72.84 | 31.56 | (70)     |
| Kshatriya            | Punjab, India      | 22 | 73.02 | 31.64 | (70)     |
| Punjab               | Punjab, India      | 42 | 73.37 | 31.72 | (79, 87) |

---

|                                                                               |                          |    |       |       |              |
|-------------------------------------------------------------------------------|--------------------------|----|-------|-------|--------------|
| Bhoksa                                                                        | Uttar Pradesh, India     | 22 | 80.09 | 27.78 | (86)         |
| Tharu                                                                         | Uttar Pradesh, India     | 31 | 79.62 | 27.87 | (70, 86)     |
| Munda (Mun)                                                                   | Uttar Pradesh, India     | 4  | 79.90 | 28.11 | (81)         |
| Kori (Kor)                                                                    | Uttar Pradesh, India     | 1  | 80.04 | 27.35 | (81)         |
| Rohidas (Ro)                                                                  | Uttar Pradesh, India     | 1  | 80.96 | 27.32 | (81)         |
| Yadava (Yd)                                                                   | Uttar Pradesh, India     | 6  | 79.22 | 27.38 | (81)         |
| Uttar Pradesh Brahmin                                                         | Uttar Pradesh, India     | 23 | 81.00 | 27.65 | (70)         |
| Rajput (Rj)                                                                   | Uttar Pradesh, India     | 14 | 80.95 | 26.87 | (81)         |
| Lodhe (Lo)                                                                    | Uttar Pradesh, India     | 1  | 80.35 | 26.31 | (81)         |
| HI, U, Uttar Pradesh, USIN,<br>UKIR, UANI, UBHA, UBOB,<br>UCHA, UD, UHC, UJEA | Uttar Pradesh, India     | 93 | 81.27 | 26.21 | (79, 80, 86) |
| Delhi                                                                         | Delhi, India             | 10 | 77.23 | 28.65 | (87)         |
| Kanet                                                                         | Kanet, India             | 29 | 72.40 | 23.00 | (70)         |
| Rajput, Rajsthan                                                              | Rajput, Rajasthan, India | 33 | 76.60 | 30.49 | (70, 86)     |
| Kashmir                                                                       | Kashmir, India           | 13 | 76.16 | 34.01 | (86)         |
| Baluch                                                                        | Pakistan, Pakistan       | 14 | 67.97 | 31.70 | (78)         |
| Brahui                                                                        | Pakistan, Pakistan       | 12 | 66.38 | 30.88 | (78)         |
| Hazara                                                                        | Pakistan, Pakistan       | 12 | 69.28 | 32.52 | (78)         |
| Hunza Burusho                                                                 | Pakistan, Pakistan       | 23 | 78.22 | 34.85 | (78)         |
| Karachi (KAR, Pakistan, UR)                                                   | Pakistan, Pakistan       | 74 | 67.04 | 25.00 | (78, 80, 86) |
| Parsi                                                                         | Pakistan, Pakistan       | 23 | 70.50 | 25.50 | (78)         |
| Pathan                                                                        | Pakistan, Pakistan       | 23 | 73.71 | 32.30 | (78)         |
| Sindhi (SI)                                                                   | Pakistan, Pakistan       | 14 | 71.24 | 28.79 | (78)         |
| Pushtoons                                                                     | Pakistan, Pakistan       | 16 | 72.03 | 33.58 | (75)         |
| Makrani                                                                       | Pakistan, Pakistan       | 8  | 62.31 | 25.90 | (78)         |

---

---

|                                   |                       |    |       |       |              |
|-----------------------------------|-----------------------|----|-------|-------|--------------|
| BI, BD, BHC, BSUY, BVII,<br>Bihar | Bihar, India          | 43 | 85.27 | 26.07 | (79, 80)     |
| Bhumij (BhuJ, BM)                 | Bihar, India          | 60 | 85.36 | 25.88 | (96, 97)     |
| Ho                                | Bihar, India          | 20 | 85.11 | 25.52 | (97)         |
| Kharia (KhaJ, KHA)                | Bihar, India          | 39 | 85.51 | 25.67 | (89, 97)     |
| Kanwar (Kan)                      | Bihar, India          | 6  | 84.91 | 25.90 | (81)         |
| Satnami (Sat)                     | Bihar, India          | 3  | 84.87 | 26.03 | (81)         |
| Santhal (Sa, SA)                  | Bihar, India          | 45 | 85.81 | 26.02 | (81, 89)     |
| Asur (AS)                         | Bihar, India          | 30 | 85.84 | 25.76 | (89)         |
| Munda (MU)                        | Bihar, India          | 23 | 85.32 | 25.73 | (89)         |
| Bharia (Bh)                       | Madhya Pradesh, India | 14 | 78.68 | 23.44 | (81)         |
| Gond (Go), Madia Gond             | Madhya Pradesh, India | 4  | 78.67 | 22.98 | (81, 91)     |
| Oran (Or)                         | Madhya Pradesh, India | 16 | 79.54 | 23.26 | (81)         |
| Muria                             | Madhya Pradesh, India | 12 | 80.08 | 23.42 | (76)         |
| Brahmin                           | Orissa, India         | 16 | 84.25 | 20.49 | (98)         |
| Gope                              | Orissa, India         | 17 | 84.25 | 20.91 | (98)         |
| Juang                             | Orissa, India         | 20 | 83.74 | 20.20 | (98)         |
| Karan                             | Orissa, India         | 14 | 83.55 | 20.70 | (98)         |
| Khandayat                         | Orissa, India         | 14 | 83.98 | 21.24 | (98)         |
| Paroja                            | Orissa, India         | 21 | 83.34 | 20.89 | (98)         |
| Saora                             | Orissa, India         | 17 | 85.42 | 20.67 | (98)         |
| Orisa                             | Orissa, India         | 2  | 85.91 | 20.30 | (86)         |
| Bengali                           | West Bengal, India    | 15 | 87.90 | 23.24 | (80, 81, 86) |
| Bengal Brahmin                    | West Bengal, India    | 36 | 88.22 | 22.76 | (70)         |
| Bengal Sudra                      | West Bengal, India    | 8  | 87.65 | 22.82 | (70)         |
| Kurmi                             | West Bengal, India    | 55 | 88.01 | 23.35 | (70)         |

---

---

|                     |                            |     |       |       |           |
|---------------------|----------------------------|-----|-------|-------|-----------|
| Lodha               | West Bengal, India         | 68  | 87.65 | 22.95 | (70, 76)  |
| Munda               | West Bengal, India         | 6   | 87.28 | 22.50 | (76)      |
| Santhal             | West Bengal, India         | 14  | 88.65 | 22.43 | (76)      |
| Bangladesh          | Bangladesh                 | 1   | 90.31 | 24.19 | (86)      |
| Bangladesh          | Bangladesh                 | 27  | 90.07 | 24.39 | (75)      |
| Great Andamanese    | Andaman Archipelago, India | 20  | 92.82 | 12.65 | (99)      |
| Jarawa              | Andaman Archipelago, India | 4   | 92.82 | 12.56 | (99)      |
| Onge                | Andaman Archipelago, India | 62  | 92.65 | 12.00 | (99)      |
| Nicobarese          | Andaman Archipelago, India | 46  | 92.66 | 11.81 | (99, 100) |
| Ao                  | Nagaland, India            | 19  | 94.57 | 26.23 | (81)      |
| Ladakhis-Bud        | Ladak, Kashmir             | 23  | 76.41 | 33.64 | (101)     |
| Ladakhis-Mus        | Ladak, Kashmir             | 9   | 76.57 | 33.77 | (101)     |
| Shia Muslim         | India                      | 120 | 80.47 | 26.54 | (102)     |
| Sunni Muslim        | India                      | 131 | 79.52 | 27.05 | (102)     |
| Dawoodi Bohra (TN)  | India                      | 62  | 78.16 | 10.47 | (102)     |
| Dawoodi Bohra (GUJ) | India                      | 50  | 71.50 | 23.02 | (102)     |
| Mappla              | India                      | 61  | 77.94 | 9.73  | (102)     |
| Iranian Shia        | India                      | 48  | 78.84 | 16.48 | (102)     |
| Tharu-C I           | Nepal                      | 57  | 84.46 | 27.72 | (103)     |
| Tharu-C II          | Nepal                      | 76  | 84.38 | 27.83 | (103)     |
| Tharu-E             | Nepal                      | 40  | 87.71 | 26.88 | (103)     |
| Nepal-Kathmandu     | Kathmandu, Nepal           | 200 | 85.32 | 27.74 | (104)     |
| Nepal-East Nepal    | East Nepal, Nepal          | 46  | 87.99 | 26.70 | (104)     |
| Tamang              | Nepal                      | 45  | 84.94 | 28.05 | (1)       |
| Newar               | Nepal                      | 66  | 86.07 | 27.80 | (1)       |
| Kathmandu           | Nepal                      | 77  | 85.33 | 27.69 | (1)       |

---

|                              |                                              |     |       |       |       |
|------------------------------|----------------------------------------------|-----|-------|-------|-------|
| Chakma                       | Chittagong hill tract, Bangladesh            | 108 | 91.83 | 22.40 | (105) |
| Marma                        | Chittagong hill tract, Bangladesh            | 97  | 91.80 | 22.37 | (105) |
| Tripura                      | Chittagong hill tract, Bangladesh            | 97  | 91.82 | 22.29 | (105) |
| Bengali                      | Lalmanir Hat, Bangladesh                     | 64  | 87.13 | 52.34 | (106) |
| Bengali                      | Dinajpur, Bangladesh                         | 176 | 87.24 | 52.19 | (106) |
| <b>Central and west Asia</b> | <b>4601</b>                                  |     |       |       |       |
| B-Arab                       | Bukharan Arabs                               | 20  | 65.83 | 38.66 | (107) |
| C-Tatar                      | Crimean Tatars                               | 20  | 34.28 | 45.38 | (107) |
| Dungan                       | Dungans                                      | 16  | 73.39 | 39.83 | (107) |
| Iranian                      | Iranians                                     | 20  | 53.99 | 35.35 | (107) |
| Karakalpak                   | Karakalpaks                                  | 20  | 59.48 | 42.78 | (107) |
| Kazak                        | Kazaks                                       | 20  | 69.24 | 41.77 | (107) |
| K-Uzbek                      | Khoremian Uzbeks                             | 20  | 61.69 | 41.77 | (107) |
| Kyrgyz                       | Kyrgyz                                       | 20  | 72.21 | 42.06 | (107) |
| Tajik                        | Tajiks                                       | 20  | 68.93 | 37.94 | (107) |
| Turkmen                      | Turkmen                                      | 20  | 61.66 | 38.69 | (107) |
| Uighur                       | Uighurs                                      | 16  | 78.48 | 42.26 | (107) |
| Uzbek                        | Uzbeks                                       | 20  | 67.75 | 40.46 | (107) |
| Kazak                        | Kazakh, Kazakhstan                           | 55  | 79.10 | 44.57 | (108) |
| KIR                          | Kirghiz, Kirghizstan                         | 47  | 71.58 | 42.64 | (108) |
| KIT                          | Kirghiz, Kirghizstan                         | 48  | 72.65 | 39.67 | (108) |
| UIG                          | Uighur, Kazakhstan                           | 55  | 82.81 | 47.52 | (108) |
| Kurdish                      | Turkmenistan                                 | 32  | 59.18 | 40.20 | (78)  |
| Lur                          | Southwestern Iran (Zagros Mountains)         | 17  | 52.10 | 30.40 | (78)  |
| Mazandarian                  | Northern Iran, southeastern Caspian Sea area | 21  | 56.36 | 37.56 | (78)  |

---

|                      |                                              |     |       |       |       |
|----------------------|----------------------------------------------|-----|-------|-------|-------|
| Persian              | Central and southern central Iran            | 42  | 55.17 | 33.50 | (78)  |
| Shughnan             | High Pamirs, Tajikistan                      | 44  | 73.84 | 38.18 | (78)  |
| Turkmen              | Turkmenistan                                 | 41  | 62.80 | 38.50 | (78)  |
| Turkish              | Mostly eastern and western Azerbaijan        | 40  | 47.48 | 38.70 | (78)  |
| Uzbek                | Surkhandarya, Uzbekistan                     | 42  | 65.48 | 41.15 | (78)  |
| Turkisha             | Anatolia, Turkey                             | 50  | 35.62 | 38.98 | (78)  |
| FER                  | Fergana, Uzbekistan                          | 53  | 71.71 | 41.05 | (109) |
| KAR                  | Karakalpakstan, Uzbekistan                   | 46  | 60.68 | 41.70 | (109) |
| KAZ                  | Kazakhstan, Kazakhstan                       | 256 | 70.43 | 41.95 | (109) |
| KYR                  | Kyrgyzstan, Kyrgyzstan                       | 249 | 71.62 | 40.86 | (109) |
| QAS                  | Qashkadarya, Uzbekistan                      | 75  | 67.16 | 38.52 | (109) |
| Gilaki               | Northern Iran, southwestern Caspian Sea area | 37  | 51.61 | 36.30 | (78)  |
| Kurdish              | Western Iran                                 | 20  | 47.97 | 33.80 | (78)  |
| Afghanistan          | Afghanistan                                  | 98  | 67.85 | 37.98 | (109) |
| Tajikistan           | Tajikistan                                   | 244 | 68.95 | 39.42 | (109) |
| Tashkent             | Uzbekistan                                   | 55  | 69.38 | 41.39 | (109) |
| Turkmenistan         | Turkmenistan                                 | 249 | 66.86 | 38.06 | (109) |
| Khorezm              | Uzbekistan                                   | 99  | 61.02 | 41.48 | (109) |
| Karakalpaks Qongirat | Uzbekistan                                   | 55  | 59.39 | 43.77 | (110) |
| Kazakhs              | Kazakhstan                                   | 50  | 59.03 | 43.72 | (110) |
| OTU                  | Uzbekistan/Turkmenistan border               | 53  | 62.11 | 41.40 | (110) |
| Turkmen              | Uzbekistan/Turkmenistan border               | 51  | 62.94 | 41.03 | (110) |
| Uzbeks               | Karakalpakia                                 | 40  | 59.56 | 43.66 | (110) |
| Kazakhstan           | Kazakhstan                                   | 27  | 67.30 | 48.34 | (111) |
| Chelkan              | Northern Altaians                            | 91  | 87.07 | 52.47 | (112) |
| Kumandin             | Northern Altaians                            | 52  | 87.13 | 52.34 | (112) |

|                  |                                       |     |        |       |       |
|------------------|---------------------------------------|-----|--------|-------|-------|
| Tubalar          | Northern Altaians                     | 71  | 87.24  | 52.19 | (112) |
| Altai-kizhi      | Southern Altaians                     | 276 | 87.65  | 51.87 | (112) |
| Altaiian Kazakhs | Kosh-Agach district of Altai Republic | 98  | 87.04  | 50.00 | (17)  |
| Persians         | Eastern Iran                          | 82  | 55.35  | 37.41 | (113) |
| Kurds            | Northwestern Iran                     | 25  | 48.10  | 38.44 | (113) |
| Tajiks           | Tajikistan                            | 44  | 72.42  | 38.63 | (113) |
| Koreans          | South Korea                           | 103 | 127.90 | 37.09 | (113) |
| Mongolians       | Ulaanbaatar, Mongolia                 | 47  | 106.90 | 47.93 | (113) |
| Kalmyks          | Kalmyk Republic                       | 110 | 45.80  | 46.78 | (113) |
| Buryats          | Buryat Republic                       | 295 | 110.30 | 54.93 | (113) |
| Khamnigans       | Buryat Republic                       | 99  | 109.84 | 52.17 | (113) |
| Tuvinians        | Tuva Republic                         | 105 | 95.63  | 51.96 | (113) |
| East Evenks      | Buryat Republic                       | 45  | 113.82 | 56.29 | (113) |
| West Evenks      | Krasnoyarsk                           | 73  | 92.99  | 56.18 | (113) |
| Yakuts           | Sakha                                 | 36  | 124.40 | 67.44 | (113) |
| Shors            | Kemerovo                              | 82  | 86.05  | 55.36 | (113) |
| Khakassians      | Khakassian Republic                   | 57  | 90.38  | 53.21 | (113) |
| Altaians-Kizhi   | South Altai                           | 90  | 85.22  | 51.34 | (113) |
| Telenghits       | South Altai                           | 71  | 85.32  | 50.98 | (113) |
| Teleuts          | Kemerovo                              | 53  | 86.08  | 55.35 | (113) |
| Chukchi          | Anadyr, Chukotka Autonomous Okrug     | 15  | 177.49 | 64.73 | (113) |
| BAL              | Georgia                               | 20  | 43.12  | 42.27 | (78)  |
| CHE              | Georgia                               | 18  | 43.23  | 41.98 | (78)  |
| GEO              | Georgia                               | 20  | 44.20  | 42.13 | (78)  |



|                                                  |                                                        |     |       |       |                                                 |
|--------------------------------------------------|--------------------------------------------------------|-----|-------|-------|-------------------------------------------------|
| RUS                                              | Russia                                                 | 151 | 69.27 | 41.30 | (109)                                           |
| Aznakaevo                                        | Aznakaevo, Russia                                      | 71  | 53.09 | 55.05 | (114)                                           |
| Buinsk                                           | Buinsk, Russia                                         | 125 | 48.28 | 54.97 | (114)                                           |
| Pol                                              | Northern Poland                                        | 436 | 18.83 | 54.12 | (115)                                           |
| Rus                                              | Russia                                                 | 201 | 41.98 | 45.06 | (115)                                           |
| Etruscans                                        | Tuscany, Italy                                         | 322 | 11.25 | 43.77 | (116)                                           |
| T2DM patients                                    | Marche, Italy                                          | 466 | 13.36 | 43.05 | (117)                                           |
| Controls                                         | Marche, Italy                                          | 438 | 13.36 | 43.05 | (117)                                           |
| Patients of sporadic prostate cancer             | Patients of sporadic prostate cancer, Southwest Europe | 239 | -3.60 | 37.18 | (118)                                           |
| Controls of sporadic prostate cancer             | Southwest Europe                                       | 150 | -3.60 | 37.18 | (118)                                           |
| Belorussian                                      | Belarus                                                | 55  | 27.49 | 53.81 | Belyaeva et al. GenBank<br>AY005336-AY005390    |
| Patients with schizophrenia and bipolar Disorder | Italy                                                  | 89  | 12.29 | 45.21 | (119)                                           |
| Ancient Cumanians                                | Hungary                                                | 11  | 19.87 | 46.53 | (120)                                           |
| Nefedjevo inhabitant                             | Russia                                                 | 8   | 32.92 | 52.05 | Buzhilova et al. GenBank<br>AF466686-AF466693   |
| Italian                                          | Trexenta, Sardinia, Italy                              | 47  | 9.10  | 39.57 | Calo et al. GenBank<br>DQ081669-DQ081715        |
| Autochthonous Basque lineages                    | Spain                                                  | 51  | -4.27 | 40.50 | Cardoso et al. GenBank AN.<br>JX669021-JX669071 |
| Autochthonous Basque lineages                    | Spain                                                  | 56  | -4.27 | 40.50 | Cardoso et al. GenBank AN.<br>JX669072-JX669127 |
| Spanish                                          | Pas Valley, Spain                                      | 61  | -3.85 | 43.20 | (121)                                           |

---

|                       |                               |      |       |       |                                                |
|-----------------------|-------------------------------|------|-------|-------|------------------------------------------------|
| Basque                | Navarre, Spain                | 110  | -1.73 | 42.62 | (122)                                          |
| Basque                | Northern Navarre, Spain       | 100  | -1.68 | 43.08 | (123)                                          |
| Basque                | Basque Country northern Spain | 106  | -2.61 | 43.07 | (123)                                          |
| Basque                | Franco-Cantabrian Region      | 35   | -0.26 | 42.40 | (123)                                          |
| Basque                | Basque Country northern Spain | 55   | -2.61 | 43.07 | (123)                                          |
| Alps                  | Italy                         | 3    | 9.92  | 45.97 | (124)                                          |
| Italian               | Sant Antioco, Sardinia, Italy | 42   | 9.02  | 40.11 | Falchi et al. GenBank<br>DQ081522-DQ081563     |
| French                | South Corsica, France         | 53   | 9.15  | 41.71 | Giovannoni et al. GenBank<br>DQ081367-DQ081419 |
| Scotch                | Scotland, UK                  | 1341 | -4.17 | 56.74 | (125)                                          |
| Norse                 | Norway                        | 323  | 7.61  | 61.88 | (125)                                          |
| Greek                 | northern Greece               | 319  | 21.42 | 40.03 | (126)                                          |
| Cyprus                | Cyprus                        | 91   | 33.18 | 34.95 | (126)                                          |
| Magyars/Hungarians    | Carpathian basin              | 35   | 19.99 | 46.50 | Kalmar et al. GenBank<br>AF487581-AF487615     |
| Veneto speakers Barco | Veneto, Italy                 | 30   | 11.94 | 45.61 | (127)                                          |
| Veneto speakers Barco | Veneto, Italy                 | 38   | 11.94 | 45.61 | (127)                                          |
| French                | France                        | 142  | 1.44  | 43.63 | (128)                                          |
| Italian               | Nuoro, Sardinia, Italy        | 51   | 9.33  | 40.32 | Varesi et al. GenBank<br>DQ067827-DQ067877     |
| Spanish               | Baleares, Spain               | 67   | 2.93  | 39.63 | Varesi et al. GenBank<br>DQ081300-DQ081366     |
| Italian               | Gallura, Sardinia, Italy      | 50   | 9.30  | 40.99 | Varesi et al. GenBank<br>DQ081420-DQ081469     |
| Italian               | San Pietro, Sardinia, Italy   | 44   | 8.80  | 40.93 | Varesi et al. GenBank                          |

---

|                        |                |              |        |       |  | DQ081564-DQ081607                          |
|------------------------|----------------|--------------|--------|-------|--|--------------------------------------------|
| Italian                | Tuscany, Italy | 61           | 11.21  | 43.64 |  | Varesi et al. GenBank<br>DQ081608-DQ081668 |
| Andalusian             | Spain          | 66           | -4.37  | 39.69 |  | Via et al. GenBank<br>DQ081234-DQ081299    |
| <b>Japan and Korea</b> |                | <b>2188</b>  |        |       |  |                                            |
| Japanese               | Japan          | 50           | 136.92 | 35.23 |  | (129)                                      |
| Japanese               | Japan          | 162          | 138.40 | 36.40 |  | (130)                                      |
| Japanese               | Japan          | 211          | 139.30 | 36.90 |  | (131)                                      |
| Japanese               | Japan          | 137          | 136.76 | 35.43 |  | (132)                                      |
| Japanese               | Japan          | 150          | 138.16 | 36.74 |  | (133)                                      |
| Japanese               | Japan          | 100          | 131.00 | 33.00 |  | (134)                                      |
| Japanese               | Japan          | 124          | 137.40 | 36.08 |  | (135)                                      |
| Japanese               | Japan          | 62           | 138.38 | 35.04 |  | (136)                                      |
| Ainu                   | Japan          | 50           | 141.38 | 43.21 |  | (136)                                      |
| Pyukyuan               | Japan          | 50           | 127.73 | 26.47 |  | (136)                                      |
| Japanese               | Japan          | 82           | 138.00 | 36.00 |  | (137)                                      |
| Japanese               | Japan          | 104          | 131.00 | 33.00 |  | (137)                                      |
| Japanese               | Japan          | 45           | 127.72 | 26.43 |  | (137)                                      |
| Koryak                 | Koryak         | 110          | 166.73 | 62.26 |  | (137)                                      |
| Nivkhi                 | Nivkhi         | 57           | 142.71 | 53.47 |  | (137)                                      |
| Korean                 | South Korea    | 694          | 127.76 | 35.90 |  | (138)                                      |
| <b>Total</b>           |                | <b>48725</b> |        |       |  |                                            |

## References

1. Gayden T, *et al.* (2013) The Himalayas: Barrier and conduit for gene flow. *Am J Phys Anthropol* 151(2):169-182.
2. Ji F, *et al.* (2012) Mitochondrial DNA variant associated with Leber hereditary optic neuropathy and high-altitude Tibetans. *Proc Natl Acad Sci U S A* 109(19):7391-7396.
3. Qi X, *et al.* (2013) Genetic evidence of paleolithic colonization and neolithic expansion of modern humans on the tibetan plateau. *Molecular Biology & Evolution* 30(8):1761-1778.
4. Qin Z, *et al.* (2010) A mitochondrial revelation of early human migrations to the Tibetan Plateau before and after the last glacial maximum. *Am J Phys Anthropol* 143(4):555-569.
5. Zhao M, *et al.* (2009) Mitochondrial genome evidence reveals successful Late Paleolithic settlement on the Tibetan Plateau. *Proc Natl Acad Sci* 106(50):21230-21235.
6. Liu X & Li S (2003) Polymorphism of mitochondrial DNA D-loop region in Chinese Baoan ethnic group. *J Fourth Mil Med Univ* 20:004.
7. Liu X & Li S (2004) Mitochondrial DNA Polymorphism in control region from Chinese Yugu population. *J Xi'an Jiaotong Univ* 16(174-177).
8. Liu X, Chen T, & Li S (2004) Sequence polymorphism of human mitochondrial DNA control region in Chinese Dongxiang unrelated individuals. *J Med Coll PLA* 19(5).
9. Liu X & Li S (2004) Study on polymorphisms of mitochondrial DNA D-loop region in the Sala population in China. *J Xi'an Jiaotong Univ* 25(213-216).
10. Oota H, *et al.* (2002) Extreme mtDNA homogeneity in continental Asian populations. *Am J Phys Anthropol* 118(2):146-153.
11. Wang W, Wise C, Baric T, Black ML, & Bittles AH (2003) The origins and genetic structure of three co-resident Chinese Muslim populations: the Salar, Bo'an and Dongxiang. *Hum Genet* 113(3):244-252.
12. Wen B, *et al.* (2004) Analyses of genetic structure of Tibeto-Burman populations reveals sex-biased admixture in southern Tibeto-Burmans. *Am J Hum Genet* 74(5):856-865.
13. Wen B, *et al.* (2004) Genetic evidence supports demic diffusion of Han culture. *Nature* 431(7006):302-305.
14. Yao Y-G, Kong Q-P, Wang C-Y, Zhu C-L, & Zhang Y-P (2004) Different matrilineal contributions to genetic structure of ethnic groups in the Silk Road region in China. *Mol Biol Evol* 21(12):2265-2280.
15. Yao Y-G, Kong Q-P, Bandelt H-J, Kivisild T, & Zhang Y-P (2002) Phylogeographic differentiation of mitochondrial DNA in Han Chinese. *Am J Hum Genet* 70(3):635-651.
16. Cheng B, *et al.* (2008) Genetic imprint of the Mongol: signal from phylogeographic analysis of mitochondrial DNA. *J Hum Genet* 53(10):905-913.

17. Derenko M, *et al.* (2012) Complete mitochondrial DNA analysis of eastern Eurasian haplogroups rarely found in populations of northern Asia and eastern Europe. *PLoS One* 7(2):e32179.
18. Kong Q-P, *et al.* (2003) Mitochondrial DNA sequence polymorphisms of five ethnic populations from northern China. *Hum Genet* 113(5):391-405.
19. Tajima A, *et al.* (2004) Genetic background of people in the Dominican Republic with or without obese type 2 diabetes revealed by mitochondrial DNA polymorphism. *J Hum Genet* 49(9).
20. Yao Y-G, Kong Q-P, Man X-Y, Bandelt H-J, & Zhang Y-P (2003) Reconstructing the evolutionary history of China: a caveat about inferences drawn from ancient DNA. *Mol Biol Evol* 20(2):214-219.
21. Zhang YJ, Xu QS, Zheng ZJ, Lin HY, & Lee JB (2005) Haplotype diversity in mitochondrial DNA hypervariable region I, II and III in northeast China Han. *Forensic Sci Int* 149(2):267-269.
22. Chen F, *et al.* (2008) Analysis of mitochondrial DNA polymorphisms in Guangdong Han Chinese. *Forensic Sci Int Genet* 2(2):150-153.
23. 陈雪 (2011) <广西壮族与海南黎族人群线粒体 DNA 群体遗传关系的研究.pdf>.
24. Hill C, *et al.* (2007) A mitochondrial stratigraphy for island southeast Asia. *Am J Hum Genet* 80(1):29-43.
25. Kivisild T, *et al.* (2002) The emerging limbs and twigs of the East Asian mtDNA tree. *Mol Biol Evol* 19(10):1737-1751.
26. Li H, *et al.* (2007) Mitochondrial DNA diversity and population differentiation in southern East Asia. *Am J Phys Anthropol* 134(4):481-488.
27. Nishimaki Y, *et al.* (1999) Sequence polymorphism in the mtDNA HV1 region in Japanese and Chinese. *Leg Med* 1(4):238-249.
28. Gan R-J, *et al.* (2008) Pinghua population as an exception of Han Chinese's coherent genetic structure. *J Hum Genet* 53(4):303-313.
29. Tabbada KA, *et al.* (2010) Philippine mitochondrial DNA diversity: a populated viaduct between Taiwan and Indonesia? *Mol Biol Evol* 27(1):21-31.
30. Tajima A, *et al.* (2003) Mitochondrial DNA polymorphisms in nine aboriginal groups of Taiwan: implications for the population history of aboriginal Taiwanese. *Hum Genet* 113(1):24-33.
31. Tsai L, *et al.* (2001) Sequence polymorphism of mitochondrial D-loop DNA in the Taiwanese Han population. *Forensic Sci Int* 119(2):239-247.
32. Wang XQ, Wang CC, Deng QY, & Li H (2013) [Genetic analysis of Y chromosome and mitochondrial DNA poly-morphism of Mulam ethnic group in Guangxi, China]. *Hereditas* 35(2):168-174.
33. Wang WZ, *et al.* (2010) Tracing the origins of Hakka and Chaoshanese by mitochondrial DNA analysis. *Am J Phys Anthropol* 141(1):124-130.
34. Wen B, *et al.* (2005) Genetic structure of Hmong-Mien speaking populations in East Asia as revealed by mtDNA lineages. *Mol Biol Evol* 22(3):725-734.
35. Li Y-C, Huang W, Tian J-Y, Chen X-Q, & Kong Q-P (2016) Exploring the maternal history of the Tai people. *J Hum Genet* 61(8):721-729.
36. Qian YP, *et al.* (2001) Mitochondrial DNA polymorphisms in Yunnan nationalities in China. *J Hum Genet* 46(4):211-220.

37. Wang C-C, *et al.* (2014) Genetic structure of Qiangic populations residing in the western Sichuan corridor. *PLoS One* 9(8):e103772.
38. Wang D, *et al.* (2012) Mitochondrial DNA copy number, but not haplogroup, confers a genetic susceptibility to leprosy in Han Chinese from Southwest China. *PLoS One* 7(6):e38848.
39. Yao Y-G, *et al.* (2002) Genetic relationship of Chinese ethnic populations revealed by mtDNA sequence diversity. *Am J Phys Anthropol* 118(1):63-76.
40. Yao Y-G & Zhang Y-P (2002) Phylogeographic analysis of mtDNA variation in four ethnic populations from Yunnan Province: new data and a reappraisal. *J Hum Genet* 47(6):311-318.
41. Bermisheva M, Tambets K, Villems R, & Khusnutdinova E (2001) [Diversity of mitochondrial DNA haplotypes in ethnic populations of the Volga-Ural region of Russia]. *Mol Biol (Mosk)* 36(6):990-1001.
42. Derbeneva OA, Starikovskaya EB, Volodko NV, Wallace DC, & Sukernik RI (2002) Mitochondrial DNA Variation in the Kets and Nganasans and Its Implications for the Initial Peopling of Northern Eurasia. *Rus J Genet* 38(11):1316-1321.
43. Derbeneva OA, *et al.* (2002) Analysis of Mitochondrial DNA Diversity in the Aleuts of the Commander Islands and Its Implications for the Genetic History of Beringia. *Am J Hum Genet* 71(2):415-421.
44. Derenko M & Shields G (1997) Diversity of mitochondrial DNA nucleotide sequences in three groups of aboriginal inhabitants of Northern Asia]. *Mol Biol (Mosk)* 31(5):784.
45. Derenko MV, *et al.* (2000) Mitochondrial DNA variation in two South Siberian Aboriginal populations: implications for the genetic history of North Asia. *Hum Biol*:945-973.
46. Derenko M, *et al.* (2003) Diversity of mitochondrial DNA lineages in South Siberia. *Ann Hum Genet* 67(5):391-411.
47. Fedorova S, Bermisheva M, Villems R, Maksimova N, & Khusnutdinova E (2003) Analysis of mitochondrial DNA haplotypes in yakut population]. *Mol Biol (Mosk)* 37(4):643.
48. Keyser-Tracqui C, Crubézy E, & Ludes B (2003) Nuclear and Mitochondrial DNA Analysis of a 2,000-Year-Old Necropolis in the Egyin Gol Valley of Mongolia. *Am J Hum Genet* 73(2):247-260.
49. Keyser - Tracqui C, Crubezy E, Pamzav H, Varga T, & Ludes B (2006) Population origins in Mongolia: genetic structure analysis of ancient and modern DNA. *Am J Phys Anthropol* 131(2):272-281.
50. Kolman CJ, Sambuughin N, & Bermingham E (1996) Mitochondrial DNA analysis of Mongolian populations and implications for the origin of New World founders. *Genetics* 142(4):1321-1334.
51. Malyarchuk B & Derenko M (2001) Mitochondrial DNA variability in Russians and Ukrainians: Implication to the origin of the Eastern Slavs. *Ann Hum Genet*

65(1):63-78.

52. Pakendorf B, *et al.* (2003) Mitochondrial DNA evidence for admixed origins of central Siberian populations. *Am J Phys Anthropol* 120(3):211-224.
53. Pimenoff VN, *et al.* (2008) Northwest Siberian Khanty and Mansi in the junction of West and East Eurasian gene pools as revealed by uniparental markers. *Eur J Hum Genet* 16(10):1254-1264.
54. Starikovskaya EB, *et al.* (2005) Mitochondrial DNA diversity in indigenous populations of the southern extent of Siberia, and the origins of Native American haplogroups. *Ann Hum Genet* 69(1):67-89.
55. Sukernik RI, *et al.* (2012) Mitochondrial genome diversity in the tubalar, even, and ulchi: Contribution to prehistory of native siberians and their affinities to native americans. *Am J Phys Anthropol* 148(1):123-138.
56. Volodko NV, *et al.* (2008) Mitochondrial genome diversity in arctic Siberians, with particular reference to the evolutionary history of Beringia and Pleistocenic peopling of the Americas. *Am J Hum Genet* 82(5):1084-1100.
57. Li Y-C, *et al.* (2015) Ancient inland human dispersals from Myanmar into interior East Asia since the Late Pleistocene. *Sci Rep* 5.
58. Oota H, Settheetham-Ishida W, Tiwawech D, Ishida T, & Stoneking M (2001) Human mtDNA and Y-chromosome variation is correlated with matrilocal versus patrilocal residence. *Nat Genet* 29(1):20-21.
59. Irwin JA, *et al.* (2008) Mitochondrial control region sequences from a Vietnamese population sample. *Int J Legal Med* 122(3):257-259.
60. Peng MS, *et al.* (2010) Tracing the Austronesian footprint in Mainland Southeast Asia: a perspective from mitochondrial DNA. *Mol Biol Evol* 27(10):2417-2430.
61. Zimmermann B, *et al.* (2009) Forensic and phylogeographic characterization of mtDNA lineages from northern Thailand (Chiang Mai). *Int J Legal Med* 123(6):495-501.
62. Black M, Dufall K, Wise C, Sullivan S, & Bittles A (2006) Genetic ancestries in northwest Cambodia. *Ann Hum Biol* 33(5-6):620-627.
63. Fucharoen G, Fucharoen S, & Horai S (2001) Mitochondrial DNA polymorphisms in Thailand. *J Hum Genet* 46(3):115-125.
64. Lertrit P, *et al.* (2008) Genetic history of Southeast Asian populations as revealed by ancient and modern human mitochondrial DNA analysis. *Am J Phys Anthropol* 137(4):425-440.
65. Hill C, *et al.* (2006) Phylogeography and ethnogenesis of aboriginal Southeast Asians. *Mol Biol Evol* 23(12):2480-2491.
66. Maruyama S, Nohira-Koike C, Minaguchi K, & Nambiar P (2010) MtDNA control region sequence polymorphisms and phylogenetic analysis of Malay population living in or around Kuala Lumpur in Malaysia. *Int J Legal Med* 124(2):165-170.
67. Friedlaender JS, *et al.* (2007) Melanesian mtDNA complexity. *PLoS One* 2(2):e248.
68. Wong HY, *et al.* (2007) Sequence polymorphism of the mitochondrial DNA hypervariable regions I and II in 205 Singapore Malays. *Leg Med* 9(1):33-37.

69. Haslindawaty ARN, Panneerchelvam S, Edinur HA, Norazmi MN, & Zafarina Z (2010) Sequence polymorphisms of mtDNA HV1, HV2, and HV3 regions in the Malay population of Peninsular Malaysia. *Int J Legal Med* 124(5):415-426.
70. Metspalu M, *et al.* (2004) Most of the extant mtDNA boundaries in south and southwest Asia were likely shaped during the initial settlement of Eurasia by anatomically modern humans. *BMC Genet* 5(1):26.
71. Bodner M, *et al.* (2011) Southeast Asian diversity: first insights into the complex mtDNA structure of Laos. *BMC Evol Biol* 11(1):49.
72. Zhang X, *et al.* (2013) Analysis of mitochondrial genome diversity identifies new and ancient maternal lineages in Cambodian aborigines. *Nat Commun* 4.
73. Summerer M, *et al.* (2014) Large-scale mitochondrial DNA analysis in Southeast Asia reveals evolutionary effects of cultural isolation in the multi-ethnic population of Myanmar. *BMC Evol Biol* 14(1):17.
74. Scholes C, *et al.* (2011) Genetic diversity and evidence for population admixture in Batak Negritos from Palawan. *Am J Phys Anthropol* 146(1):62-72.
75. Cordaux R, *et al.* (2003) Mitochondrial DNA analysis reveals diverse histories of tribal populations from India. *Eur J Hum Genet* 11(3):253-264.
76. Roychoudhury S, *et al.* (2001) Genomic structures and population histories of linguistically distinct tribal groups of India. *Hum Genet* 109(3):339-350.
77. Reddy BM, *et al.* (2007) Austro-Asiatic tribes of Northeast India provide hitherto missing genetic link between South and Southeast Asia. *PLoS One* 2(11):e1141.
78. Quintana-Murci L, *et al.* (2004) Where west meets east: the complex mtDNA landscape of the southwest and Central Asian corridor. *Am J Hum Genet* 74(5):827-845.
79. Sharma S, Saha A, Rai E, Bhat A, & Bamezai R (2005) Human mtDNA hypervariable regions, HVR I and II, hint at deep common maternal founder and subsequent maternal gene flow in Indian population groups. *J Hum Genet* 50(10):497-506.
80. Barnabas S, Shouche Y, & Suresh C (2006) High - Resolution mtDNA Studies of the Indian Population: Implications for Palaeolithic Settlement of the Indian Subcontinent. *Ann Hum Genet* 70(1):42-58.
81. Thangaraj K, *et al.* (2005) Different population histories of the Mundari-and Mon-Khmer-speaking Austro-Asiatic tribes inferred from the mtDNA 9-bp deletion/insertion polymorphism in Indian populations. *Hum Genet* 116(6):507-517.
82. Mountain JL, *et al.* (1995) Demographic history of India and mtDNA-sequence diversity. *Am J Hum Genet* 56:979-992.
83. Rajkumar R & Kashyap V (2003) Haplotype diversity in mitochondrial DNA hypervariable regions I and II in three communities of Southern India. *Forensic Sci Int* 136(1):79-82.
84. Rajkumar R & Kashyap VK (2003) Mitochondrial DNA hypervariable region I and II sequence polymorphism in the Dravidian linguistic group of India. *J Forensic Sci* 48(1):227-237.
85. Thangaraj K, Ramana GV, & Singh L (1999) Y - chromosome and mitochondrial DNA polymorphisms in Indian populations. *Electrophoresis* 20(8):1743-1747.



86. Kivisild T, *et al.* (1999) Deep common ancestry of Indian and western-Eurasian mitochondrial DNA lineages. *Curr Biol* 9(22):1331-1334.
87. Quintana-Murci L, *et al.* (1999) Genetic evidence of an early exit of Homo sapiens sapiens from Africa through eastern Africa. *Nat Genet* 23(4):437-441.
88. Thanseem I, *et al.* (2006) Genetic affinities among the lower castes and tribal groups of India: inference from Y chromosome and mitochondrial DNA. *BMC Genet* 7(1):42.
89. Kumar V, *et al.* (2006) Global patterns in human mitochondrial DNA and Y-chromosome variation caused by spatial instability of the local cultural processes. *PLoS Genet* 2(4):e53.
90. Kivisild T, *et al.* (2003) The genetic heritage of the earliest settlers persists both in Indian tribal and caste populations. *Am J Hum Genet* 72(2):313-332.
91. Watkins W, *et al.* (1999) Multiple origins of the mtDNA 9-bp deletion in populations of South India. *Am J Phys Anthropol* 109(2):147-158.
92. Mittal B, *et al.* (2008) Mitochondrial DNA variation and substructure among the tribal populations of Andhra Pradesh, India. *Am J Hum Biol* 20(6):683-692.
93. Gaikwad S & Kashyap V (2005) Molecular insight into the genesis of ranked caste populations of western India based upon polymorphisms across non-recombinant and recombinant regions in genome. *Genome Biol* 6(8):P10.
94. Roy S, Thakur C, & Majumder PP (2003) Mitochondrial DNA variation in ranked caste groups of Maharashtra (India) and its implication on genetic relationships and origins. *Ann Hum Biol* 30(4):443-454.
95. Baig M, Khan A, & Kulkarni K (2004) Mitochondrial DNA diversity in tribal and caste groups of Maharashtra (India) and its implication on their genetic origins. *Ann Hum Genet* 68(5):453-460.
96. Kaur I, *et al.* (2002) Genomic diversities and affinities among four endogamous groups of Punjab (India) based on autosomal and mitochondrial DNA polymorphisms. *Hum Biol*:819-836.
97. Banerjee J, Trivedi R, & Kashyap V (2005) Mitochondrial DNA control region sequence polymorphism in four indigenous tribes of Chotanagpur plateau, India. *Forensic Sci Int* 149(2):271-274.
98. Sahoo S & Kashyap V (2006) Phylogeography of mitochondrial DNA and Y - Chromosome haplogroups reveal asymmetric gene flow in populations of Eastern India. *Am J Phys Anthropol* 131(1):84-97.
99. Thangaraj K, *et al.* (2003) Genetic affinities of the Andaman Islanders, a vanishing human population. *Curr Biol* 13(2):86-93.
100. Prasad BV, *et al.* (2001) Mitochondrial DNA variation in Nicobarese Islanders. *Human Biology* 73(5):715-725.
101. Wirth T, *et al.* (2004) Distinguishing human ethnic groups by means of sequences from Helicobacter pylori: Lessons from Ladakh. *Proc Natl Acad Sci* 101(14):4746-4751.
102. Easwarkhanth M, *et al.* (2010) Traces of sub-Saharan and Middle Eastern lineages in Indian Muslim populations. *Eur J Hum Genet* 18(3):354-363.

103. Fornarino S, *et al.* (2009) Mitochondrial and Y-chromosome diversity of the Tharus (Nepal): a reservoir of genetic variation. *BMC Evol Biol* 9(1):154.
104. Wang H-W, *et al.* (2012) Revisiting the role of the Himalayas in peopling Nepal: insights from mitochondrial genomes. *J Hum Genet* 57(4):228-234.
105. Gazi NN, *et al.* (2013) Genetic Structure of Tibeto-Burman Populations of Bangladesh: Evaluating the Gene Flow along the Sides of Bay-of-Bengal. *PLoS One* 8(10):e75064.
106. Li YC, *et al.* (2017) Cultural diffusion of Indo-Aryan languages into Bangladesh: A perspective from mitochondrial DNA. *Mitochondrion* 38.
107. Comas D, *et al.* (2004) Admixture, migrations, and dispersals in Central Asia: evidence from maternal DNA lineages. *Eur J Hum Genet* 12(6):495-504.
108. Comas D, *et al.* (1998) Trading genes along the silk road: mtDNA sequences and the origin of central Asian populations. *Am J Hum Genet* 63(6):1824-1838.
109. Irwin JA, *et al.* (2010) The mtDNA composition of Uzbekistan: a microcosm of Central Asian patterns. *Int J Legal Med* 124(3):195-204.
110. Chaix R, *et al.* (2007) From social to genetic structures in central Asia. *Curr Biol* 17(1):43-48.
111. Lalueza-Fox C, *et al.* (2004) Unravelling migrations in the steppe: mitochondrial DNA sequences from ancient Central Asians. *Proc R Soc Lond B Biol Sci* 271(1542):941-948.
112. Dulik Matthew C, *et al.* (2012) Mitochondrial DNA and Y Chromosome Variation Provides Evidence for a Recent Common Ancestry between Native Americans and Indigenous Altaians. *Am J Hum Genet* 90(2):229-246.
113. Derenko M, *et al.* (2007) Phylogeographic Analysis of Mitochondrial DNA in Northern Asian Populations. *Am J Hum Genet* 81(5):1025-1041.
114. Malyarchuk B, Derenko M, Denisova G, & Kravtsova O (2010) Mitogenomic diversity in Tatars from the Volga-Ural region of Russia. *Mol Biol Evol* 27(10):2220-2226.
115. Malyarchuk B, *et al.* (2002) Mitochondrial DNA variability in Poles and Russians. *Ann Hum Genet* 66(4):261-283.
116. Achilli A, *et al.* (2007) Mitochondrial DNA variation of modern Tuscans supports the near eastern origin of Etruscans. *Am J Hum Genet* 80(4):759-768.
117. Achilli A, *et al.* (2011) Mitochondrial DNA backgrounds might modulate diabetes complications rather than T2DM as a whole. *PLoS One* 6(6):e21029.
118. Álvarez-Cubero MJ, *et al.* (2012) Mitochondrial Haplogroups and Polymorphisms Reveal No Association with Sporadic Prostate Cancer in a Southern European Population. *PLoS One* 7(7):e41201.
119. Bertolin C, *et al.* (2011) Analysis of complete mitochondrial genomes of patients with schizophrenia and bipolar disorder. *J Hum Genet* 56(12):869-872.
120. Bogacsi-Szabo E, *et al.* (2005) Mitochondrial DNA of ancient Cumanians: culturally Asian steppe nomadic immigrants with substantially more western Eurasian mitochondrial DNA lineages. *Hum Biol*:639-662.
121. Cardoso S, *et al.* (2010) Variability of the entire mitochondrial DNA control region in a human isolate from the Pas Valley (northern Spain). *J Forensic Sci* 55(5):1196-1201.

122. Cardoso S, *et al.* (2011) The maternal legacy of Basques in northern navarre: New insights into the mitochondrial DNA diversity of the Franco - Cantabrian area. *Am J Phys Anthropol* 145(3):480-488.
123. Cardoso S, *et al.* (2013) The Expanded mtDNA Phylogeny of the Franco-Cantabrian Region Upholds the Pre-Neolithic Genetic Substrate of Basques. *PLoS One* 8(7):e67835.
124. Di Benedetto G, *et al.* (2000) Mitochondrial DNA sequences in prehistoric human remains from the Alps. *Eur J Hum Genet* 8(9):669-677.
125. Helgason A, *et al.* (2001) mtDNA and the islands of the North Atlantic: estimating the proportions of Norse and Gaelic ancestry. *Am J Hum Genet* 68(3):723-737.
126. Irwin J, *et al.* (2008) Mitochondrial control region sequences from northern Greece and Greek Cypriots. *Int J Legal Med* 122(1):87-89.
127. Mogentale-Profizi N, *et al.* (2001) Mitochondrial DNA sequence diversity in two groups of Italian Veneto speakers from Veneto. *Ann Hum Genet* 65(2):153-166.
128. Pierron D, *et al.* (2008) New evidence of a mitochondrial genetic background paradox: impact of the J haplogroup on the A3243G mutation. *BMC Med Genet* 9(1):41.
129. Koyama H, *et al.* (2002) Mitochondrial sequence haplotype in the Japanese population. *Forensic Sci Int* 125(1):93-96.
130. Imaizumi K, Parsons TJ, Yoshino M, & Holland M (2002) A new database of mitochondrial DNA hypervariable regions I and II sequences from 162 Japanese individuals. *Int J Legal Med* 116(2):68-73.
131. Maruyama S, Minaguchi K, & Saitou N (2003) Sequence polymorphisms of the mitochondrial DNA control region and phylogenetic analysis of mtDNA lineages in the Japanese population. *Int J Legal Med* 117(4):218-225.
132. Nagai A, Nakamura I, Shiraki F, Bunai Y, & Ohya I (2003) Sequence polymorphism of mitochondrial DNA in Japanese individuals from Gifu Prefecture. *Leg Med* 5:S210-S213.
133. Nishimaki Y, *et al.* (1999) Sequence polymorphism in the mtDNA HV1 region in Japanese and Chinese. *Legal Med* 1(4):238-249.
134. Seo Y, Stradmann-Bellinghausen B, Rittner C, Takahama K, & Schneider PM (1998) Sequence polymorphism of mitochondrial DNA control region in Japanese. *Forensic Sci Int* 97(2):155-164.
135. Mabuchi T, Susukida R, Kido A, & Oya M (2007) Typing the 1.1 kb control region of human mitochondrial DNA in Japanese individuals. *J Forensic Sci* 52(2):355-363.
136. Horai S, *et al.* (1996) mtDNA polymorphism in East Asian Populations, with special reference to the peopling of Japan. *Am J Hum Genet* 59(3):579.
137. Tajima A, *et al.* (2004) Genetic origins of the Ainu inferred from combined DNA analyses of maternal and paternal lineages. *J Hum Genet* 49(4):187-193.
138. Lee HY, *et al.* (2006) East Asian mtDNA haplogroup determination in Koreans: Haplogroup-level coding region SNP analysis and subhaplogroup-level control region sequence analysis. *Electrophoresis* 27(22):4408-4418.



Table S4. Radiocarbon dates of archaeological sites with millet (n=120) in the TP and north China.

| Site               | Elevation (m.asl) | <sup>14</sup> C age (BP) | Calibrated age 2σ (BP) | Reference |
|--------------------|-------------------|--------------------------|------------------------|-----------|
| Yuezhuang          | 45                | 6900 ± 35                | 7745 ± 78              | 1         |
| Beiqian            | 10                | 4690 ± 35                | 5448 ± 129             | 2         |
| Beiqian            | 10                | 4470 ± 40                | 5132 ± 160             | 2         |
| Beiqian            | 10                | 4695 ± 35                | 5448 ± 129             | 2         |
| Beiqian            | 10                | 4660 ± 35                | 5440 ± 128             | 2         |
| Beiqian            | 10                | 4570 ± 40                | 5248 ± 196             | 2         |
| Beiqian            | 10                | 4640 ± 30                | 5386 ± 78              | 2         |
| Beiqian            | 10                | 4555 ± 35                | 5243 ± 190             | 2         |
| Xinglonggou        | 354               | —                        | 7640 ± 30              | 3         |
| Xianglushan        | 668               | 3340 ± 30                | 3579 ± 100             | 4         |
| Xianglushan        | 668               | 3360 ± 30                | 3588 ± 103             | 4         |
| Baoguluxi          | 630               | 3450 ± 30                | 3733 ± 96              | 4         |
| Xianglushan        | 668               | 2880 ± 30                | 3014 ± 126             | 4         |
| Guangdegongnanshan | 1118              | 2410 ± 30                | 2518 ± 168             | 4         |
| Huamuzhazi         | 1529              | 2690 ± 30                | 2800 ± 48              | 4         |
| Nanjaokou          | 477               | 5220 ± 35                | 6042 ± 132             | 5         |
| Nanjaokou          | 477               | 5550 ± 40                | 6347 ± 59              | 5         |
| Nanjaokou          | 477               | 5195 ± 40                | 6033 ± 140             | 5         |
| Nanjaokou          | 477               | 4480 ± 45                | 5136 ± 164             | 5         |
| Nanjaokou          | 477               | 4690 ± 40                | 5447 ± 130             | 5         |
| Nanjaokou          | 477               | 4655 ± 40                | 5439 ± 131             | 5         |
| Nanjaokou          | 477               | 4685 ± 35                | 5447 ± 129             | 5         |
| Nanjaokou          | 477               | 4535 ± 35                | 5181 ± 130             | 5         |
| Nanjaokou          | 477               | 4645 ± 40                | 5435 ± 133             | 5         |

---

|              |     |         |          |   |
|--------------|-----|---------|----------|---|
| Nanjiaokou   | 477 | 4505±35 | 5172±128 | 5 |
| Nanjiaokou   | 477 | 5550±35 | 6347±55  | 5 |
| Nanjiaokou   | 477 | 4530±35 | 5180±130 | 5 |
| Huizui       | 209 | 3590±40 | 3896±168 | 5 |
| Huizui       | 209 | 3455±55 | 3715±135 | 6 |
| Huizui       | 209 | 3415±35 | 3698±124 | 6 |
| Huizui       | 209 | 3425±35 | 3703±122 | 6 |
| Huizui       | 209 | 3600±70 | 3896±194 | 6 |
| Huizui       | 209 | 4380±30 | 4950±88  | 6 |
| Huizui       | 209 | 3680±30 | 4025±112 | 7 |
| Huizui       | 209 | 3595±30 | 3906±70  | 7 |
| Huizui       | 209 | 3180±35 | 3407±63  | 7 |
| Nanshi       | 128 | 3740±70 | 4136±244 | 7 |
| Sigou        | 113 | 4260±50 | 4795±167 | 8 |
| Weizhuang    | 192 | 4330±70 | 4965±310 | 8 |
| Fengyangzhai | 248 | 2940±40 | 3088±120 | 8 |
| Tianposhuiku | 253 | 3060±50 | 3231±150 | 8 |
| Feiyao       | 183 | 3510±40 | 3769±120 | 8 |
| Gaoya        | 126 | 2665±35 | 2795±49  | 7 |
| Gaoya        | 126 | 4420±30 | 5069±199 | 7 |
| Jinzhongshi  | 126 | 3655±30 | 3988±95  | 7 |
| Jingyanggang | 126 | 2575±30 | 2638±120 | 7 |
| Jingyanggang | 126 | 3175±25 | 3405±43  | 7 |

---

---

|               |      |         |          |    |
|---------------|------|---------|----------|----|
| Matun         | 223  | 3590±60 | 3898±183 | 8  |
| Matun         | 223  | 3550±25 | 3816±92  | 7  |
| Matun         | 223  | 3465±35 | 3736±95  | 7  |
| Matun         | 223  | 3390±35 | 3685±124 | 7  |
| Shaochai      | 130  | 3125±35 | 3340±102 | 7  |
| Tunzhai       | 130  | 3630±30 | 3965±111 | 7  |
| Tunzhai       | 130  | 3060±40 | 3266±99  | 7  |
| zhaiwan       | 127  | 3605±35 | 3948±116 | 7  |
| Luokoudong    | 127  | 3190±45 | 3413±143 | 7  |
| Baligang      | 126  | 2935±35 | 3086±119 | 9  |
| Yingyang      | 454  | 4950±85 | 5696±209 | 10 |
| Mawangcun     | 414  | 2850±50 | 2995±147 | 11 |
| Mawangcun     | 414  | 2900±50 | 3027±146 | 11 |
| Mawangcun     | 414  | 2860±33 | 2972±99  | 12 |
| Xishanping    | 1330 | 4490±35 | 5140±158 | 13 |
| Guanzizui     | 2126 | 3630±30 | 3965±111 | 14 |
| Sumiaoyuantou | 1740 | 3600±25 | 3908±64  | 14 |
| Laohuzui      | 1358 | 3870±30 | 4287±126 | 14 |
| Xihetan       | 1608 | 3795±50 | 4199±206 | 15 |
| Mozuizi       | 1722 | 3750±35 | 4109±124 | 15 |
| Buziping      | 2134 | 4300±25 | 4893±63  | 16 |
| Buziping      | 2134 | 3610±20 | 3918±58  | 16 |
| Linjia        | 2320 | 4110±95 | 4632±217 | 17 |

---

---

|                |      |          |           |    |
|----------------|------|----------|-----------|----|
| Jinchankou     | 2309 | 3555 ±25 | 3840 ±115 | 18 |
| Jinchankou     | 2309 | 3705 ±25 | 4060 ±84  | 18 |
| Jinchankou     | 2309 | 3705 ±25 | 4060 ±84  | 18 |
| Jinchankou     | 2309 | 3585 ±20 | 3899 ±63  | 18 |
| Benbakou       | 2415 | 4135 ±25 | 4695 ±126 | 14 |
| Pingandongcun  | 2100 | 3980 ±25 | 4466 ±53  | 14 |
| Xinjia         | 1815 | 3690 ±30 | 4035 ±109 | 14 |
| Wayaotai       | 1697 | 3410 ±30 | 3694 ±118 | 14 |
| Andaqiha       | 2015 | 4340 ±40 | 4937 ±98  | 14 |
| Shangduoba     | 2065 | 4035 ±30 | 4600 ±177 | 14 |
| Hurere         | 1930 | 4530 ±60 | 5208 ±234 | 19 |
| Luowalinchang  | 2326 | 4470 ±25 | 5141 ±164 | 19 |
| Gayixiangjing  | 2255 | 4410 ±40 | 5068 ±206 | 19 |
| Hongtjiaozi    | 2254 | 4395 ±30 | 4956 ±90  | 19 |
| Gayixiangjing  | 2255 | 4370 ±25 | 4947 ±87  | 19 |
| Andaqiha       | 2059 | 4340 ±40 | 4937 ±98  | 19 |
| Zhangga        | 2210 | 4340 ±40 | 4937 ±98  | 19 |
| Heibiya        | 2355 | 4245 ±30 | 4759 ±103 | 19 |
| Hongyazhangjia | 1941 | 4185 ±35 | 4712 ±127 | 19 |
| Benbakou       | 2408 | 4185 ±25 | 4731 ±105 | 19 |
| Benbakou       | 2408 | 4135 ±25 | 4695 ±126 | 19 |
| Luowalinchang  | 2326 | 4110 ±30 | 4669 ±145 | 19 |
| Shangduoba     | 2105 | 4035 ±30 | 4600 ±178 | 19 |

---



|                  |      |         |          |    |
|------------------|------|---------|----------|----|
| Dongcun          | 2280 | 3980±25 | 4467±54  | 19 |
| Yaluhu           | 2002 | 3940±25 | 4402±109 | 19 |
| Mijiawan         | 2233 | 3900±30 | 4332±86  | 19 |
| Liuwanshagou     | 1901 | 3840±25 | 4279±127 | 19 |
| Yangjiazhaipo    | 2468 | 3715±25 | 4064±83  | 19 |
| Xinjia           | 1835 | 3690±30 | 3994±149 | 19 |
| Xiasunjiazhai    | 2334 | 3680±25 | 4008±82  | 19 |
| Nanshansi        | 1953 | 3680±25 | 4008±82  | 19 |
| Ajiacun          | 2527 | 3640±30 | 3975±107 | 19 |
| Zhongtan         | 2132 | 3640±30 | 3975±107 | 19 |
| Zhaojiazhuang    | 2093 | 3595±25 | 3906±67  | 19 |
| Qingshiya        | 2146 | 3755±25 | 4111±118 | 19 |
| Wayaotai         | 1760 | 3410±30 | 3694±121 | 19 |
| Karuo            | 3233 | 4115±25 | 4669±142 | 20 |
| Karuo            | 3233 | 3995±25 | 4469±51  | 20 |
| Karuo            | 3233 | 3980±40 | 4431±135 | 20 |
| Karuo            | 3233 | 3910±25 | 4337±83  | 20 |
| Guojiacun        | 54   | 3990±90 | 4486±327 | 21 |
| Yuanqushangcheng | 262  | 3550±90 | 3850±236 | 17 |
| Nanshantou       | 785  | 4685±30 | 5446±127 | 22 |
| Nanshantou       | 785  | 4340±30 | 4935±90  | 22 |
| Nanshantou       | 785  | 4265±25 | 4844±18  | 22 |
| Gaomuxudi        | 1850 | 4150±30 | 4701±124 | 23 |

|             |      |         |          |    |
|-------------|------|---------|----------|----|
| Xihetan     | 1587 | 3675±35 | 4020±120 | 23 |
| Xitai       | 2029 | 3770±25 | 4039±105 | 23 |
| Duojialiang | 1820 | 3730±20 | 40699±80 | 23 |
| Xichengyi   | 1462 | 3745±25 | 4110±122 | 23 |

Reference:

1. Crawford CW, Chen XS, Luan FS, Wang JH. A preliminary analysis on plant remains of the Yuezhuang site in Changqing district, Jinan city, Shandong province. *Jiangnan Archaeology* **127**, 107-116 (2013). (InChinese)
2. Jin GY, Wagner M, Tarasov PE, Wang F, Liu YC. Archaeobotanical records of Middle and Late Neolithic agriculture from Shandong Province, East China, and a major change in regional subsistence during the Dawenkou Culture. *The Holocene* **26**, 1605-1615 (2016).
3. Zhao ZJ. New Archaeobotanic Data for the Study of the Origins of Agriculture in China. *Current Anthropology* **52**(4), S295-S306 (2011).
4. Jia X, *et al.* The transition of human subsistence strategies in relation to climate change during the Bronze Age in the West Liao River Basin, Northeast China. *The Holocene* **26**, 781-789 (2016).
5. Henan Provincial Institute of Cultural Relics. Nanjiaokou site in Sanmenxia city. Beijing: Science Press, (2009). (In Chinese)
6. Lee GA, Bestel S. Contextual analysis of plant remains at the Erlito-period Huizui site, Henan, China. *Bulletin of the Indo-Pacific Prehistory Association* **27**, 49-60 (2007).
7. Zhang JN, Xia ZK, Zhang XH. Research on charred plant remains from the Neolithic to the Bronze Age in Luoyang Basin . *Chin Sci Bull* **59**, 3388–3397 (2014). (in Chinese)
8. Lee GA, Crawford GW, Liu L, Chen XC. Plants and people from the Early Neolithic to Shang periods in North China. *Proceedings of the National Academy of Sciences* **104**, 1087-1092 (2007).
9. Deng ZH, Qin L, Gao Y, Weisskopf AR, Zhang C, Fuller DQ. From early domesticated rice of the Middle Yangtze Basin to Millet, rice and wheat agriculture:

Archaeobotanical macro-remains from Baligang, Nanyang Basin, Central China (6700–500 BC). *PLoS One* **10**, e0139885 (2015).

10. Radiocarbon laboratory of Peking University. Radiocarbon dating report (one). *Cultural Relics*, (1996). (In Chinese)
11. Experts of Xia-Shang-Zhou Chronology Project. Panel of Xia-Shang-Zhou Chronology Project. Beijing: World Book Inc, (2000). (In Chinese)
12. Institute of Archaeology, Chinese Academy of Social Sciences. Radiocarbon dating report, (2002). (In Chinese)
13. Li XQ, Zhou XY, Zhou J, Dodson J, Zhang HB, Shang X. The earliest archaeobiological evidence of the broadening agriculture in China recorded at Xishanping site in Gansu Province. *Science in China Series D: Earth Sciences* **50**, 1707-1714 (2007).
14. Dong GH, *et al.* A comparative study of radiocarbon dating charcoal and charred seeds from the same flotation samples in the Late Neolithic and Bronze Age sites in the Gansu and Qinghai Provinces, Northwest China. *Radiocarbon* **56**, 157-163 (2014).
15. Zhou XY, Li XQ, Dodson J, Zhao KL. Rapid agricultural transformation in the prehistoric Hexi corridor, China. *Quaternary International* **426**, 33-41 (2016).
16. Jia X, *et al.* The development of agriculture and its impact on cultural expansion during the late Neolithic in the Western Loess Plateau, China. *The Holocene* **23**, 85-92 (2013).
17. Institute of Archaeology Chinese Academy of Social Sciences. Radiocarbon dating report (seven). *Cultural Relics*, (1987). (In Chinese)
18. Yang Y. The analysis of charred plant seeds at Jinchankou site and Lijiaping site during Qijia culture period in the Hehuang region, China. Master's Thesis. Lanzhou: Lanzhou University, (2014).
19. Chen FH, *et al.* Agriculture facilitated permanent human occupation of the Tibetan Plateau after 3600 BP. *Science* **347**. 248-250 (2015).
20. D'Alpoim Guedes, J. Adaptation and invention during the spread of agriculture to southwest China. Doctoral dissertation. Cambridge: Harvard University, (2013).
21. Institute of Archaeology Chinese Academy of Social Sciences. Radiocarbon dating report (six). *Cultural Relics*, (1990). (In Chinese).
22. Wang X, Shang X, Jiang HE, Zhang CP, Wang WL, Wang CS. A preliminary study of flotation results of two ancient sites in the Baishui River region, Shaanxi province. *Archaeology and Cultural Relics* **2**, 100-104 (2015).

23. Dong GH, *et al.* Prehistoric trans-continental cultural exchange in the Hexi Corridor, northwest China. *The Holocene* **28**(4), 621-628 (2018).

Table S5. Radiocarbon dates of archaeological sites with wheat and barley remains (n=131) in the TP and north China.

| Site          | Elevation (m.asl) | <sup>14</sup> C age (BP) | Calibrated age 2σ(BP) | Reference |
|---------------|-------------------|--------------------------|-----------------------|-----------|
| Feiyaonan     | 213               | 2840±25                  | 2950±83               | 1         |
| Feiyaonan     | 213               | 3000±30                  | 3200±125              | 1         |
| Zhaojiashuimo | 1468              | 2600±40                  | 2647±139              | 2         |
| Yingwoshu     | 1179              | 3150±30                  | 3356±91               | 2         |
| Yingwoshu     | 1179              | 3245±30                  | 3478±82               | 2         |
| Ganguya       | 1468              | 3025±35                  | 3212±132              | 2         |
| Guojiashan    | 1534              | 3370±35                  | 3591±106              | 2         |
| Guojiashan    | 1534              | 3380±30                  | 3629±64               | 2         |
| Ganggangwa    | 1216              | 3560±50                  | 3842±132              | 2         |
| Huoshiliang   | 1208              | 3635±45                  | 3959±125              | 2         |
| Mozuizi       | 1799              | 2115±50                  | 2126±177              | 3         |
| Diaoyutai     | 34                | 2370±90                  | 2440±281              | 4         |
| Xindian       | 1862              | 2805±35                  | 2812±16               | 9         |
| Donghuishan   | 1782              | 3215±50                  | 3460±104              | 5         |
| Donghuishan   | 1782              | 3195±50                  | 3415±144              | 5         |
| Donghuishan   | 1782              | 3215±40                  | 3460±96               | 5         |
| Donghuishan   | 1782              | 3195±35                  | 3449±93               | 5         |
| Donghuishan   | 1782              | 3235±35                  | 3471±88               | 5         |
| Donghuishan   | 1782              | 3225±35                  | 3467±91               | 5         |
| Donghuishan   | 1782              | 3175±35                  | 3369±95               | 5         |
| Donghuishan   | 1782              | 3235±35                  | 3471±88               | 5         |
| Donghuishan   | 1782              | 3260±35                  | 3484±85               | 5         |
| Donghuishan   | 1782              | 3250±35                  | 3479±83               | 5         |
| Donghuishan   | 1782              | 3265±35                  | 3486±85               | 5         |

|                    |      |         |          |   |
|--------------------|------|---------|----------|---|
| Donghuishan        | 1782 | 3240±35 | 3474±86  | 5 |
| Donghuishan        | 1782 | 3260±45 | 3481±96  | 3 |
| Donghuishan        | 1782 | 3405±50 | 3671±157 | 3 |
| Donghuishan        | 1782 | 3425±40 | 3702±124 | 3 |
| Donghuishan        | 1782 | 3410±50 | 3695±135 | 3 |
| Xichengyi          | 1476 | 3391±26 | 3635±58  | 6 |
| Xichengyi          | 1476 | 3602±22 | 3910±62  | 6 |
| Xichengyi          | 1476 | 3391±24 | 3635±57  | 6 |
| Lijiaping          | 2508 | 3370±35 | 3591±106 | 7 |
| Lijiaping          | 2508 | 3380±35 | 3609±99  | 7 |
| Lijiaping          | 2508 | 3240±30 | 3474±85  | 7 |
| Jinchankou         | 2419 | 3565±20 | 3867±90  | 7 |
| Jinchankou         | 2419 | 3605±25 | 3911±65  | 7 |
| Jinchankou         | 2419 | 3515±25 | 3782±78  | 7 |
| Jinchankou         | 2419 | 3545±25 | 3812±89  | 7 |
| Jinchankou         | 2419 | 3535±25 | 3806±85  | 7 |
| Jinchankou         | 2419 | 3565±25 | 3846±116 | 7 |
| Jinchankou         | 2419 | 3595±20 | 3906±65  | 8 |
| Jinchankou         | 2419 | 3440±30 | 3730±99  | 8 |
| Huangniangniangtai | 1794 | 3570±60 | 3867±208 | 3 |
| Huochaogou         | 1751 | 2495±45 | 2560±180 | 3 |
| Huochaogou         | 1751 | 3430±50 | 3703±106 | 3 |
| Shaguoliang        | 1283 | 3390±50 | 3653±171 | 3 |
| Shaguoliang        | 1283 | 3450±60 | 3718±146 | 3 |
| Nansha             | 437  | 3260±35 | 3484±85  | 3 |
| Nansha             | 437  | 3275±30 | 3493±80  | 3 |

|                  |      |         |          |    |
|------------------|------|---------|----------|----|
| Nansha           | 437  | 3300±30 | 3522±69  | 3  |
| Dongfengxinan    | 2028 | 3010±40 | 3206±134 | 9  |
| Shuangerdongping | 2017 | 2770±25 | 2865±76  | 9  |
| Yantai           | 40   | 2695±25 | 2802±45  | 10 |
| Zhaojiazhuang    | 10   | 3905±50 | 4514±4   | 10 |
| Jiaochangpu      | 33   | 2710±20 | 2807±43  | 10 |
| Jiaochangpu      | 33   | 2210±50 | 2208±135 | 10 |
| Liujiiazhuang    | 18   | 2841±26 | 2961±93  | 10 |
| Daxinzhuang      | 51   | 3114±30 | 3314±75  | 10 |
| Dongpan          | 59   | 2503±29 | 2611±122 | 10 |
| Dongpan          | 59   | 2511±28 | 2614±124 | 10 |
| Zhaogezhuang     | 15   | 2746±26 | 2847±72  | 10 |
| Wangchenggang    | 248  | 3155±30 | 3359±90  | 10 |
| Wangchenggang    | 248  | 3205±25 | 3421±46  | 10 |
| Wangchenggang    | 248  | 3210±40 | 3458±97  | 10 |
| Wangchenggang    | 248  | 3180±25 | 3407±42  | 10 |
| Yanshishangcheng | 124  | 2475±20 | 2589±123 | 10 |
| zhouyuan         | 682  | 3140±20 | 3047±91  | 10 |
| Donggao          | 357  | 2895±20 | 3047±91  | 10 |
| changguogou      | 3659 | 3122±29 | 3340±94  | 10 |
| changguogou      | 3659 | 3070±30 | 3273±89  | 10 |
| changguogou      | 3659 | 3100±30 | 3306±73  | 10 |
| changguogou      | 3659 | 3120±30 | 3316±73  | 10 |
| Bangga           | 3562 | 2260±24 | 2252±93  | 10 |
| Bangga           | 3562 | 2280±30 | 2255±95  | 10 |
| Bangga           | 3562 | 2450±30 | 2531±171 | 10 |

|               |      |         |          |    |
|---------------|------|---------|----------|----|
| Bangga        | 3562 | 2820±30 | 2925±76  | 10 |
| Karuo         | 3233 | 2913±27 | 3061±95  | 10 |
| Karuo         | 3233 | 2877±24 | 2974±81  | 10 |
| Karuo         | 3233 | 3317±27 | 3540±73  | 10 |
| Fengtai       | 2642 | 2615±20 | 2750±13  | 10 |
| Xishanping    | 1451 | 2450±20 | 2530±168 | 10 |
| Xishanping    | 1451 | 2460±20 | 2551±154 | 10 |
| Xishanping    | 1451 | 2510±25 | 2614±123 | 10 |
| Xishanping    | 1451 | 2500±20 | 2642±151 | 10 |
| Guojiashan    | 1726 | 3560±25 | 3843±115 | 11 |
| Maolinshan    | 1785 | 2900±30 | 3054±101 | 11 |
| Lijiageleng   | 1804 | 3415±25 | 3699±111 | 11 |
| Huoshiliang   | 1198 | 3495±20 | 3768±65  | 11 |
| Shaguoliang   | 1266 | 3250±30 | 3480±81  | 11 |
| Dadunwan      | 1789 | 3155±20 | 3395±49  | 11 |
| Xihuishan     | 1654 | 3445±20 | 3730±92  | 11 |
| Ganguya       | 1821 | 3435±20 | 3727±94  | 11 |
| Sanjiaocheng  | 1440 | 2500±25 | 2607±118 | 11 |
| Huoshitan     | 1306 | 2505±20 | 2609±117 | 11 |
| Zhaojiashuimo | 1451 | 2630±20 | 2756±14  | 11 |
| Guohuitai     | 2300 | 2505±20 | 2609±117 | 11 |
| Huochaogou    | 1774 | 2770±25 | 2865±76  | 11 |
| Lucheng       | 946  | 2140±25 | 2145±145 | 11 |
| Gudongtan     | 1267 | 2520±35 | 2616±127 | 11 |
| Xiasunjiazhai | 2247 | 3340±40 | 3578±108 | 8  |
| Xiasunjiazhai | 2247 | 3665±25 | 3997±88  | 8  |



|                  |      |         |          |   |
|------------------|------|---------|----------|---|
| Gongshijia       | 2074 | 3620±30 | 3955±112 | 8 |
| Gongshijia       | 2074 | 3165±35 | 3398±63  | 8 |
| Jiaoridang       | 2258 | 2486±68 | 2546±190 | 8 |
| Talitaliha       | 2802 | 2840±30 | 2961±95  | 8 |
| Talitaliha       | 2802 | 2770±30 | 2866±78  | 8 |
| Xiariyamakebu    | 3050 | 3100±30 | 3306±73  | 8 |
| Hongshanzuinanpo | 3086 | 3075±30 | 3288±78  | 8 |
| Huidui           | 2384 | 3060±35 | 3266±100 | 8 |
| Lagalamaerma     | 3341 | 3060±30 | 3285±75  | 8 |
| Luowalinchang    | 2326 | 3075±40 | 3277±98  | 8 |
| Luowalinchang    | 2326 | 3050±30 | 3262±95  | 8 |
| Longshan         | 2585 | 3030±25 | 3250±90  | 8 |
| Tawendaliha      | 2861 | 3110±52 | 3324±141 | 8 |
| Aiqingya         | 3221 | 3160±30 | 3361±88  | 8 |
| Kalashishuwan    | 2642 | 3020±25 | 3210±126 | 8 |
| Weijiabao        | 2423 | 2905±30 | 3075±122 | 8 |
| Tuanjie          | 2836 | 2930±35 | 3088±121 | 8 |
| Erfang           | 1772 | 2910±30 | 3078±121 | 8 |
| Wenjia           | 1813 | 2890±30 | 3041±115 | 8 |
| Bayan            | 2815 | 2860±20 | 2977±88  | 8 |
| Longshan         | 2585 | 2790±20 | 2882±73  | 8 |
| Yingpandi        | 2343 | 2760±25 | 2854±72  | 8 |
| Xiawatai         | 2660 | 2750±30 | 2848±71  | 8 |
| Lalongwa         | 2811 | 2685±30 | 2799±48  | 8 |
| Gagai            | 2610 | 2550±30 | 2624±126 | 8 |
| Keer             | 3190 | 2550±30 | 2624±126 | 8 |

|          |      |         |          |   |
|----------|------|---------|----------|---|
| Lamuzui  | 2314 | 2520±40 | 2606±140 | 8 |
| Yangou   | 1878 | 2460±30 | 2534±171 | 8 |
| Shawuang | 2697 | 2325±30 | 2317±133 | 8 |

Reference:

1. Zhang JN, Xia ZK, Zhang XH. Research on charred plant remains from the Neolithic to the Bronze Age in Luoyang Basin . *Chin Sci Bull* **59**, 3388–3397 (2014). (in Chinese)
2. Zhou XY, Li XQ, Dodson J, Zhao KL. Rapid agricultural transformation in the prehistoric Hexi corridor, China. *Quaternary International* **426**, 33-41 (2016).
3. Dodson J, Li XQ, Zhou XY, Zhao KL, Sun N, Atahan P. Origin and spread of wheat in China. *Quaternary Science Reviews* **72**, 108-111 (2013).
4. Institute of Archaeology, Chinese Academy of Social Sciences. Radiocarbon dates report. Beijing: Cultural Relics Press, (1991).
5. Flad R, Li SC, Wu XH, Zhao ZJ. Early wheat in China: Results from new studies at Donghuishan in the Hexi Corridor. *The Holocene* **20**, 955-965 (2010).
6. Institute of Archaeology, Chinese Academy of Social Sciences. Radiocarbon dates report (forty one). *Archaeology*, (1991).
7. Yang Y. The analysis of charred plant seeds at Jinchankou site and Lijiaping site during Qijia culture period in the Hehuang region, China. Master's Thesis. Lanzhou: Lanzhou University, (2014).
8. Chen FH, *et al.* Agriculture facilitated permanent human occupation of the Tibetan Plateau after 3600 BP. *Science* **347**, 248-250 (2015).
9. Dong GH, *et al.* A comparative study of radiocarbon dating charcoal and charred seeds from the same flotation samples in the Late Neolithic and Bronze Age sites in the Gansu and Qinghai Provinces, Northwest China. *Radiocarbon* **56**, 157-163 (2014).
10. Liu XY, *et al.* The virtues of small grain size: Potential pathways to a distinguishing feature of Asian wheats. *Quaternary International* **426**, 107-119 (2016).
11. Dong GH, Y *et al.* Prehistoric trans-continental cultural exchange in the Hexi Corridor, northwest China. *The Holocene* **28**(4), 621-628 (2018).

Table S6. Radiocarbon dates of sites with human bones and the stable isotope signals in the TP and north China.

| Site           | Elevation<br>(m.asl) | <sup>14</sup> C dates<br>(BP) | Calibrated age<br>2σ (BP) | Archaeological age | Stable isotope signals | Reference |
|----------------|----------------------|-------------------------------|---------------------------|--------------------|------------------------|-----------|
| Dadiwan        | 1456                 | 5010±35                       | 5773±119                  | —                  | C <sub>4</sub>         | 1         |
| Dadiwan        | 1456                 | 4950±30                       | 5669±46                   | —                  | C <sub>4</sub>         | 1         |
| Xinglonggou I  | 548                  | 6485±35                       | 7389±70                   | —                  | C <sub>4</sub>         | 5         |
| Xinglonggou I  | 548                  | 6695±40                       | 7567±83                   | —                  | C <sub>4</sub>         | 5         |
| Baiyinchanghan | 937                  | 5290±55                       | 6068±139                  | —                  | C <sub>4</sub>         | 5         |
| Caomaoshan     | 515                  | 4550±35                       | 5185±135                  | —                  | C <sub>4</sub>         | 5         |
| Caomaoshan     | 515                  | 4570±40                       | 5248±196                  | —                  | C <sub>4</sub>         | 5         |
| Caomaoshan     | 515                  | 4605±40                       | 5268±197                  | —                  | C <sub>4</sub>         | 5         |
| Xishan-Chifeng | 572                  | 4020±50                       | 4651±242                  | —                  | C <sub>4</sub>         | 5         |
| Xishan-Chifeng | 572                  | 4045±40                       | 4608±189                  | —                  | C <sub>4</sub>         | 5         |
| Xishan-Chifeng | 572                  | 4035±40                       | 4601±183                  | —                  | C <sub>4</sub>         | 5         |
| Xinglongwa 3   | 548                  | 3165±35                       | 3361±94                   | —                  | C <sub>4</sub>         | 5         |
| Xinglongwa 3   | 548                  | 3120±40                       | 3335±108                  | —                  | C <sub>4</sub>         | 5         |
| Xinglongwa 3   | 548                  | 3130±40                       | 3342±102                  | —                  | C <sub>4</sub>         | 5         |
| huoshiliang    | 1208                 | 3515±45                       | 3774±129                  | —                  | C <sub>4</sub>         | 6         |
| huoshiliang    | 1208                 | 3590±45                       | 3898±173                  | —                  | C <sub>4</sub>         | 6         |
| Liuzhuang      | 104                  | —                             | —                         | 3750-3600 BP       | C <sub>4</sub>         | 7         |
| Qijiaping      | 1940                 | 3050±50                       | 3228±148                  | —                  | C <sub>4</sub>         | 8         |
| Qijiaping      | 1940                 | 3215±40                       | 3460±96                   | —                  | C <sub>4</sub>         | 8         |
| liangchengzhen | 37                   | —                             | —                         | 4600-4000 BP       | C <sub>4</sub>         | 10        |
| Dongying       | 3                    | —                             | —                         | 5900-5500 BP       | C <sub>4</sub>         | 11        |
| Dongying       | 3                    | —                             | —                         | 4600-4000 BP       | C <sub>4</sub>         | 11        |
| Hupo           | 2380                 | 3785±35                       | 4143±143                  | —                  | C <sub>4</sub>         | 13        |

|                   |      |          |          |              |                |    |
|-------------------|------|----------|----------|--------------|----------------|----|
| Xiahaishi         | 1800 | 3680±30  | 4025±112 | —            | C <sub>4</sub> | 13 |
| Xiahaishi         | 1800 | 3630±30  | 3965±111 | —            | C <sub>4</sub> | 13 |
| Sanheyi           | 2400 | 3595±25  | 3905±65  | —            | C <sub>4</sub> | 13 |
| Xin'anzhuang      | 82   | —        | —        | 3600-3046 BP | C <sub>4</sub> | 14 |
| Beiliu            | 551  | —        | —        | 8000-5500 BP | C <sub>4</sub> | 15 |
| Jiangzhai         | 405  | —        | —        | 6900-6000 BP | C <sub>4</sub> | 16 |
| Shijia            | 478  | —        | —        | 6300-6000 BP | C <sub>4</sub> | 16 |
| Yinxu             | 80   | —        | —        | 3250-3046 BP | C <sub>4</sub> | 17 |
| Mengjiawa         | 111  | —        | —        | 2770-2200 BP | C <sub>4</sub> | 18 |
| Zongri            | 2820 | —        | —        | 5200-4100 BP | C <sub>4</sub> | 19 |
| Mozuizi           | 1779 | —        | —        | 4350-4000 BP | C <sub>4</sub> | 20 |
| Wuba              | 2310 | —        | —        | 4450-3950 BP | C <sub>4</sub> | 20 |
| Taosi             | 582  | —        | —        | 4600-4000 BP | C <sub>4</sub> | 21 |
| Xujianian         | 1650 | 2745±130 | 2858±367 | —            | C <sub>4</sub> | 21 |
| Liulihe Tombs     | 51   | —        | —        | 3046-2771 BP | C <sub>4</sub> | 21 |
| Yanshishangcheng  | 124  | —        | —        | 3500 BP      | C <sub>4</sub> | 21 |
| Nanzhai           | 321  | —        | —        | 3750-3530 BP | C <sub>4</sub> | 21 |
| Guzhendu          | 163  | —        | —        | 6650-5600 BP | C <sub>4</sub> | 21 |
| Beizhuang         | 13   | —        | —        | 5400-5100 BP | C <sub>4</sub> | 21 |
| Qingliangsi Tombs | 504  | —        | —        | 5500 BP      | C <sub>4</sub> | 23 |
| Xinzhai           | 123  | —        | —        | 3870-3720 BP | C <sub>4</sub> | 24 |
| Erlitou           | 120  | —        | —        | 3735-3530 BP | C <sub>4</sub> | 24 |
| Qianzhangda       | 45   | —        | —        | 3100 BP      | C <sub>4</sub> | 24 |
| Wadian            | 128  | —        | —        | 4200-3900 BP | C <sub>4</sub> | 25 |
| Beiquan           | 6    | —        | —        | 6000-5000 BP | C <sub>4</sub> | 27 |
| Nancheng tombs    | 55   | —        | —        | 4000-3600 BP | C <sub>4</sub> | 29 |

|                   |      |          |          |              |                                |    |
|-------------------|------|----------|----------|--------------|--------------------------------|----|
| Shengedaliang     | 986  | 3180±30  | 3406±49  | —            | C <sub>4</sub>                 | 30 |
| Yuhuazhai         | 406  | —        | —        | 5000 BP      | C <sub>4</sub>                 | 31 |
| Jianhe Tombs      | 963  | —        | —        | 2475-2221 BP | C <sub>4</sub>                 | 32 |
| Dabaoshan Tombs   | 1160 | —        | —        | 2410-2180 BP | C <sub>4</sub>                 | 35 |
| Lajia             | 1786 | 3580±20  | 3897±63  | —            | C <sub>4</sub>                 | 36 |
| Xichengyi         | 1476 | —        | —        | 3880-3680 BP | C <sub>4</sub>                 | 37 |
| Jiahu             | 70   | —        | —        | 9000-7800 BP | C <sub>3</sub>                 | 2  |
| Xiaojingshan      | 117  | —        | —        | 8000 BP      | C <sub>3</sub>                 | 3  |
| lingyanghe        | 111  | 3630±145 | 3999±405 | —            | C <sub>3</sub>                 | 21 |
| Baishicun         | 40   | 5840±110 | 6665±260 | —            | C <sub>3</sub>                 | 21 |
| Hemudu            | 5    | —        | —        | 7500-5000 BP | C <sub>3</sub>                 | 22 |
| Songze            | 2    | —        | —        | 6400-4850 BP | C <sub>3</sub>                 | 22 |
| Sanxingcun        | 5    | —        | —        | 6500-5500 BP | C <sub>3</sub>                 | 26 |
| Shilinggang       | 842  | —        | —        | 2700-2300 BP | C <sub>3</sub>                 | 33 |
| Jinlianshan Tombs | 1752 | —        | —        | 2500-2200 BP | C <sub>3</sub>                 | 33 |
| Baijia            | 344  | 6710±40  | 7582±75  | —            | C <sub>3</sub> /C <sub>4</sub> | 4  |
| Qinglongquan      | 161  | —        | —        | 5000-4200 BP | C <sub>3</sub> /C <sub>4</sub> | 9  |
| Gouwan            | 171  | —        | —        | 7000-6600 BP | C <sub>3</sub> /C <sub>4</sub> | 12 |
| Gouwan            | 171  | —        | —        | 6600-6000 BP | C <sub>3</sub> /C <sub>4</sub> | 12 |
| Gouwan            | 171  | —        | —        | 5000-4600 BP | C <sub>3</sub> /C <sub>4</sub> | 12 |
| Mogou             | 2200 | 3190±30  | 3410±49  | —            | C <sub>3</sub> /C <sub>4</sub> | 13 |
| Lajigai           | 2100 | 3010±60  | 3183±177 | —            | C <sub>3</sub> /C <sub>4</sub> | 13 |
| Banpo             | 417  | —        | —        | 6800-6300 BP | C <sub>3</sub> /C <sub>4</sub> | 16 |
| Xiaozhujiacun     | 19   | —        | —        | 6650-5600 BP | C <sub>3</sub> /C <sub>4</sub> | 18 |
| Zhanqi            | 2317 | —        | —        | 3100-2950 BP | C <sub>3</sub> /C <sub>4</sub> | 20 |
| Mogou             | 2200 | —        | —        | 3750-3100 BP | C <sub>3</sub> /C <sub>4</sub> | 20 |

|                 |      |   |   |              |                                |    |
|-----------------|------|---|---|--------------|--------------------------------|----|
| Beishouling     | 601  | — | — | 7500-5750 BP | C <sub>3</sub> /C <sub>4</sub> | 21 |
| Huxizhuang      | 462  | — | — | 4600-4000 BP | C <sub>3</sub> /C <sub>4</sub> | 21 |
| Shangsunjiazhai | 2399 | — | — | 3600-2600 BP | C <sub>3</sub> /C <sub>4</sub> | 22 |
| Wadian          | 128  | — | — | 4200-3900 BP | C <sub>3</sub> /C <sub>4</sub> | 25 |
| Shenmingpu      | 952  | — | — | 2475-2221 BP | C <sub>3</sub> /C <sub>4</sub> | 28 |
| Xigongqiao      | 70   | — | — | 5000-4500 BP | C <sub>3</sub> /C <sub>4</sub> | 34 |

C<sub>3</sub>, a pure C<sub>3</sub> diet of human would correspond to a collagen  $\delta^{13}\text{C}$  from -22.7‰—-19.4‰.

C<sub>4</sub>, a pure C<sub>4</sub> diet would result in a value between -10.7‰ and -6.8‰.

C<sub>3</sub>/C<sub>4</sub>, the  $\delta^{13}\text{C}$  value of human bone collagen ranges between -19.4‰ and -10.7‰.

## Reference

1. Barton L, Newsome SD, Chen FH, Wang H, Guilderson TP, Bettinger RL. Agricultural origins and the isotopic identity of domestication in northern China. *Proceedings of the National Academy of Sciences* **106**, 5523-5528 (2009).
2. Hu YW, Ambrose S H, Wang C. Stable isotopic analysis of human bones from Jiahu site, Henan, China: implications for the transition to agriculture. *Journal of Archaeological Science* **33**, 1319-1330 (2006).
3. Hu YW, Wang SG, Luan FS, Wang CS, Richards MP. 2008. Stable isotope analysis of humans from Xiaojingshan site: implications for understanding the origin of millet agriculture in China. *Journal of Archaeological Science* **35**, 2960-2965 (2008).
4. Atahan P, *et al.* Early Neolithic diets at Baijia, Wei River valley, China: stable carbon and nitrogen isotope analysis of human and faunal remains. *Journal of Archaeological Science* **38**, 2811-2817 (2011).
5. Liu XY, Jones MK, Zhao ZJ, Liu GX, O'Connell TC. The earliest evidence of millet as a staple crop: new light on Neolithic foodways in North China. *American Journal of Physical Anthropology* **149**, 283-290 (2012).
6. Atahan P, *et al.* Subsistence and the isotopic signature of herding in the Bronze Age Hexi Corridor, NW Gansu, China. *Journal of Archaeological Science* **38**, 1747-1753 (2011).

7. Hou LL, *et al.* Human subsistence strategy at Liuzhuang site, Henan, China during the proto-Shang culture (~ 2000–1600 BC) by stable isotopic analysis. *Journal of Archaeological Science* **40**, 2344-2351 (2013).
8. Ma MM, *et al.* Stable isotope analysis of human and animal remains at the Qijiaping site in middle Gansu, China. *International Journal of Osteoarchaeology* **25**, 923-934 (2015).
9. Guo Y, Fan Y, Hu Y, Zhu J, Richards MP. Diet transition or human migration in the Chinese Neolithic? Dietary and migration evidence from the stable isotope analysis of humans and animals from the Qinglongquan site, China. *International Journal of Osteoarchaeology* **28**, 85-94 (2018).
10. Lanehart RE, *et al.* Dietary adaptation during the Longshan period in China: stable isotope analyses at Liangchengzhen (southeastern Shandong). *Journal of Archaeological Science* **38**, 2171-2181 (2011).
11. Chen X L, *et al.* Raising practices of Neolithic livestock evidenced by stable isotope analysis in the Wei River valley, North China. *International Journal of Osteoarchaeology* **26**, 42-52 (2016).
12. Fu QM, Jin SA, Hu YW, Ma Z, Pan JC, Wang CS. Agricultural development and human diets in Gouwan site, Xichuan, Henan. *Chinese Science Bulletin* **55**, 614-620 (2010).
13. Ma MM, Dong GH, Jia X, Wang H, Cui YF, Chen FH. Dietary shift after 3600 cal yr BP and its influencing factors in northwestern China: Evidence from stable isotopes. *Quaternary Science Reviews* **145**, 57-70 (2016).
14. Cheung C, Jing ZC, Tang JG, Yue ZW, Richards MP. Examining social and cultural differentiation in early Bronze Age China using stable isotope analysis and mortuary patterning of human remains at Xin'an Zhuang, Yinxu. *Archaeological and Anthropological Sciences* **9**, 799-816 (2017).
15. Guo Y, *et al.* A preliminary study of the nature of prehistoric society: with the stable isotope analysis of the Beiliu people's diet composition as an example. *Huaxia Archaeology* **1**, 009 (2017) (In Chinese)
16. Pechenkina E A, Ambrose S H, Ma XL, Benfer Jr, RA. Reconstructing northern Chinese Neolithic subsistence practices by isotopic analysis. *Journal of Archaeological Science* **32**, 1176-1189 (2005).
17. Cheung C, Jing ZC, Tang JG, Weston DA, Richards MP. Diets, social roles, and geographical origins of sacrificial victims at the royal cemetery at Yinxu, Shang China: new evidence from stable carbon, nitrogen, and sulfur isotope analysis. *Journal of Anthropological Archaeology* **48**, 28-45 (2017).
18. Qi WY, *et al.* On the diet of the people represented by the human bones unearthed from the upper Shuhe River valley in Shandong. *Huaxia Archaeology* **2**, 005 (2004) (In Chinese)

19. Cui YP, *et al.* Stable isotope analysis on human bones from Zongri site. *Quaternary Sciences*, 604-611 (2006).
20. Liu X, *et al.* From necessity to choice: dietary revolutions in west China in the second millennium BC. *World Archaeology* **46**, 661-680 (2014).
21. Cai LZ, Qiu SH. The study of  $^{13}\text{C}$  and ancient diets. *Archaeology* **10**, 449-455(1984). (In Chinese)
22. Zhang XL, Wang JX, Xian ZQ, Qiu SH. The study of ancient human diets. *Archaeology* **2**, 62-75 (2003). (In Chinese)
23. Ling X, Chen L, Xue XM, Zhao CC. Stable isotopic analysis of human bones from the Qingliang temple graveyard, Ruicheng county, Shanxi province. *Quaternary Sciences* **2**, 415-421 (2010). (In Chinese)
24. Zhou LG, Garvie-Lok, SJ. Isotopic evidence for the expansion of wheat consumption in northern China. *Archaeological Research in Asia* **4**, 25-35 (2015).
25. Chen XL, *et al.* Isotopic Reconstruction of the Late Longshan Period (ca. 4200–3900 BP) Dietary Complexity before the Onset of State - Level Societies at the Wadian Site in the Ying River Valley, Central Plains, China. *International Journal of Osteoarchaeology* **26**(5), 808-817 (2016).
26. Hu YW, Wang GF, Cui YP, Dong Y, Guan L, Wang CS. Palaeodietary study of Sanxingcun Site, Jintan, Jiangsu. *Chinese Science Bulletin* **52**, 660-664 (2007).
27. Wang F, *et al.* Reconstructing the food structure of ancient coastal inhabitants from Beiqian village: Stable isotopic analysis of fossil human bone. *Chinese science bulletin* **57**, 2148-2154 (2012).
28. Hou LL, Wang N, Lü P, Hu YW, Song GD, Wang CS. Transition of human diets and agricultural economy in Shenmingpu Site, Henan, from the Warring States to Han Dynasties. *Science China Earth Sciences* **55**, 975-982 (2012).
29. Ma Y, *et al.* Isotopic perspectives ( $\delta^{13}\text{C}$ ,  $\delta^{15}\text{N}$ ,  $\delta^{34}\text{S}$ ) of diet, social complexity, and animal husbandry during the proto - Shang period (ca. 2000–1600 BC) of China. *American journal of physical anthropology* **160**, 433-445 (2016).
30. Chen XL, *et al.* The subsistence patterns of the Shengedaliang site (~4,000 yr BP) revealed by stable carbon and nitrogen isotopes in northern Shaanxi, China. *Science China Earth Sciences* **60**: 268–276 (2017).
31. Zhang XL, *et al.* Studies on diet of the ancient people of the Yangshao cultural sites in the Central Plain. *ACTA ANTHROPOLOGICAL SINICA* **2**, 197-207 (2010). (In Chinese)
32. Ling X, Wang WS, Chen L, Sun LJ, Hu YW. Stable isotope analysis of Qin human bones from Jianhe cemetery in Baoji city, Shaanxi province. *Archaeology and Cultural Relics* **1**, 95-98 (2010).



33. Ren LL, *et al.* Human paleodiet and animal utilization strategies during the Bronze Age in northwest Yunnan Province, southwest China. *PloS one* **12**(5), e0177867 (2017).
34. Hu YW, He DL, Dong Y, Wang CS, Gao MK, Lan YF. Stable isotopic analysis on human bones from the Xigongqiao site, Tengzhou, Shandong. *Quaternary Sciences* **5**, 561-567 (2005). (In Chinese)
35. Zhang XY, Zhang X, Suo MJ, Wei D, Hu YW. The influence of agriculture in the process of population integration and cultural interaction during the Eastern Zhou Period in central-south, Inner Mongolia: Carbon and nitrogen stable isotope analysis of human bones from the Dabaoshan cemetery, Helingeer County. *Science China Earth Sciences* **61**, 205-214 (2018).
36. Zhang XL, Ye ML. A preliminary study on ancient diets in Lajia site—Carbon and nitrogen stable isotope analysis on human bones from disaster ruins in Lajia site. *Relics from South*, 197-202 (2016). (In Chinese)
37. Zhang XL, *et al.* A preliminary analysis on Paleo-diets of ancient humans in Xichengyi site, Zhangye Gansu. *Archaeology*, 110-120 (2015). (In Chinese)

**Table S7. Distribution of haplogroups in different geographic regions based on HVS and whole mitogenome datasets.**

|          | Tibet            |                   |                  | Northwest China   |                 | North China      |                  | South China       |                 | Southwestern China |                 | North Asia        |                  | Southeast Asia    |                   | South Asia        |                  | Central and West Asia |                  | Western Eurasia   |                   | Japan and Korea   |                  |
|----------|------------------|-------------------|------------------|-------------------|-----------------|------------------|------------------|-------------------|-----------------|--------------------|-----------------|-------------------|------------------|-------------------|-------------------|-------------------|------------------|-----------------------|------------------|-------------------|-------------------|-------------------|------------------|
|          | 671 (This study) | 7481 <sup>a</sup> | 201 <sup>b</sup> | 1195 <sup>a</sup> | 53 <sup>b</sup> | 975 <sup>a</sup> | 232 <sup>b</sup> | 3975 <sup>a</sup> | 97 <sup>b</sup> | 3530 <sup>a</sup>  | 98 <sup>b</sup> | 4688 <sup>a</sup> | 832 <sup>b</sup> | 8040 <sup>a</sup> | 1266 <sup>b</sup> | 6832 <sup>a</sup> | 688 <sup>b</sup> | 4543 <sup>a</sup>     | 997 <sup>b</sup> | 1042 <sup>a</sup> | 4535 <sup>b</sup> | 2188 <sup>a</sup> | 790 <sup>b</sup> |
| A        | 11               | 369               | 1                | 84                | 1               | 55               | 3                | 104               | 3               | 89                 | 0               | 68                | 3                | 35                | 1                 | 50                | 0                | 42                    | 2                | 2                 | 0                 | 47                | 0                |
| A8a      | 1                | 0                 | 1                | 0                 | 0               | 1                | 0                | 0                 | 0               | 0                  | 0               | 16                | 7                | 0                 | 0                 | 0                 | 0                | 23                    | 0                | 0                 | 0                 | 6                 | 0                |
| A11a1a†  | 29               | 292               | 7                | 7                 | 0               | 1                | 0                | 2                 | 0               | 2                  | 0               | 0                 | 0                | 0                 | 0                 | 0                 | 0                | 0                     | 0                | 0                 | 0                 | 0                 | 0                |
| A11b     | 3                | 64                | 3                | 3                 | 0               | 0                | 0                | 0                 | 0               | 29                 | 0               | 0                 | 0                | 0                 | 0                 | 0                 | 0                | 0                     | 0                | 0                 | 0                 | 0                 | 0                |
| A14      | 1                | 29                | 0                | 0                 | 0               | 7                | 0                | 4                 | 0               | 14                 | 0               | 0                 | 1                | 30                | 4                 | 8                 | 0                | 9                     | 2                | 0                 | 0                 | 3                 | 0                |
| A14a†    | 6                | 0                 | 6                | 0                 | 0               | 0                | 0                | 0                 | 0               | 0                  | 0               | 0                 | 0                | 0                 | 0                 | 0                 | 0                | 0                     | 0                | 0                 | 0                 | 0                 | 0                |
| A14b1†   | 3                | 0                 | 3                | 0                 | 0               | 0                | 0                | 0                 | 0               | 0                  | 0               | 0                 | 0                | 0                 | 0                 | 0                 | 0                | 0                     | 0                | 0                 | 0                 | 0                 | 0                |
| A15a†    | 6                | NA                | 1                | NA                | 1               | NA               | 2                | NA                | 0               | NA                 | 0               | NA                | 0                | NA                | 0                 | NA                | 0                | NA                    | 0                | NA                | 0                 | NA                | 0                |
| A15c†    | 0                | NA                | 0                | NA                | 0               | NA               | 0                | NA                | 0               | NA                 | 0               | NA                | 0                | NA                | 0                 | NA                | 0                | NA                    | 0                | NA                | 0                 | NA                | 0                |
| A15c1†   | 1                | NA                | 14               | NA                | 0               | NA               | 1                | NA                | 0               | NA                 | 0               | NA                | 0                | NA                | 0                 | NA                | 0                | NA                    | 0                | NA                | 0                 | NA                | 0                |
| A15c2†   | 4                | NA                | 0                | NA                | 0               | NA               | 0                | NA                | 0               | NA                 | 0               | NA                | 0                | NA                | 0                 | NA                | 0                | NA                    | 0                | NA                | 0                 | NA                | 0                |
| A17      | 2                | NA                | 0                | NA                | 0               | NA               | 1                | NA                | 0               | NA                 | 0               | NA                | 0                | NA                | 10                | NA                | 0                | NA                    | 1                | NA                | 0                 | NA                | 0                |
| A17a2†   | 3                | NA                | 0                | NA                | 0               | NA               | 0                | NA                | 0               | NA                 | 0               | NA                | 0                | NA                | 0                 | NA                | 0                | NA                    | 0                | NA                | 0                 | NA                | 0                |
| A21†     | 14               | NA                | 3                | NA                | 0               | NA               | 0                | NA                | 0               | NA                 | 0               | NA                | 0                | NA                | 0                 | NA                | 1                | NA                    | 0                | NA                | 0                 | NA                | 0                |
| A6       | 2                | NA                | 4                | NA                | 0               | NA               | 0                | NA                | 1               | NA                 | 0               | NA                | 1                | NA                | 0                 | NA                | 1                | NA                    | 0                | NA                | 0                 | NA                | 0                |
| A6b†     | 1                | 0                 | 4                | 0                 | 0               | 0                | 0                | 0                 | 0               | 0                  | 0               | 0                 | 0                | 0                 | 0                 | 1                 | 0                | 0                     | 0                | 0                 | 0                 | 0                 | 0                |
| N9a1     | 1                | 13                | 1                | 5                 | 0               | 7                | 0                | 21                | 3               | 15                 | 0               | 6                 | 2                | 3                 | 3                 | 0                 | 0                | 16                    | 1                | 0                 | 0                 | 7                 | 2                |
| N9a5     | 1                | 0                 | 0                | 1                 | 0               | 1                | 0                | 0                 | 0               | 0                  | 0               | 0                 | 0                | 0                 | 0                 | 0                 | 0                | 1                     | 0                | 0                 | 0                 | 7                 | 3                |
| N11a1    | 1                | 13                | 0                | 3                 | 0               | 0                | 0                | 1                 | 0               | 7                  | 0               | 0                 | 0                | 0                 | 0                 | 0                 | 0                | 2                     | 0                | 0                 | 0                 | 0                 | 0                |
| X2p      | 1                | NA                | 0                | NA                | 0               | NA               | 0                | NA                | 0               | NA                 | 0               | NA                | 0                | NA                | 0                 | NA                | 6                | NA                    | 1                | NA                | 0                 | NA                | 0                |
| B4a      | 1                | NA                | 0                | NA                | 0               | NA               | 0                | NA                | 0               | NA                 | 0               | NA                | 0                | NA                | 0                 | NA                | 0                | NA                    | 0                | NA                | 0                 | NA                | 0                |
| B4a1     | 1                | 0                 | 0                | 0                 | 1               | 0                | 3                | 7                 | 1               | 14                 | 0               | 0                 | 0                | 84                | 18                | 1                 | 0                | 6                     | 3                | 0                 | 0                 | 0                 | 13               |
| B4a4     | 4                | 57                | 0                | 8                 | 0               | 2                | 3                | 19                | 1               | 19                 | 0               | 4                 | 4                | 3                 | 0                 | 5                 | 0                | 1                     | 0                | 0                 | 0                 | 4                 | 2                |
| B4h1     | 2                | 1                 | 0                | 0                 | 0               | 0                | 1                | 4                 | 1               | 2                  | 0               | 0                 | 0                | 0                 | 2                 | 0                 | 0                | 7                     | 0                | 0                 | 0                 | 0                 | 0                |
| B4b1a2   | 1                | NA                | 0                | NA                | 0               | NA               | 0                | NA                | 0               | NA                 | 2               | NA                | 0                | NA                | 14                | NA                | 0                | NA                    | 0                | NA                | 0                 | NA                | 0                |
| B4d1'2'3 | 7                | NA                | 0                | NA                | 0               | NA               | 0                | NA                | 1               | NA                 | 0               | NA                | 0                | NA                | 0                 | NA                | 0                | NA                    | 0                | NA                | 0                 | NA                | 0                |
| B4b4†    | 4                | NA                | 0                | NA                | 0               | NA               | 0                | NA                | 0               | NA                 | 0               | NA                | 0                | NA                | 0                 | NA                | 0                | NA                    | 0                | NA                | 0                 | NA                | 0                |
| B4c1b2c2 | 1                | 5                 | 0                | 1                 | 0               | 4                | 3                | 0                 | 1               | 5                  | 0               | 0                 | 0                | 3                 | 2                 | 0                 | 1                | 0                     | 0                | 0                 | 0                 | 1                 | 1                |
| B5a1c2   | 1                | NA                | 0                | NA                | 0               | NA               | 0                | NA                | 0               | NA                 | 0               | NA                | 0                | NA                | 0                 | NA                | 0                | NA                    | 0                | NA                | 0                 | NA                | 0                |
| B5b      | 2                | 60                | 0                | 6                 | 0               | 8                | 1                | 0                 | 1               | 19                 | 0               | 6                 | 0                | 69                | 1                 | 19                | 0                | 9                     | 0                | 0                 | 0                 | 14                | 0                |
| B5b1     | 1                | NA                | 0                | NA                | 0               | NA               | 0                | NA                | 0               | NA                 | 0               | NA                | 0                | NA                | 0                 | NA                | 0                | NA                    | 0                | NA                | 0                 | NA                | 0                |
| B5b4     | 1                | 1                 | 0                | 0                 | 0               | 1                | 0                | 0                 | 0               | 0                  | 0               | 5                 | 1                | 0                 | 0                 | 1                 | 0                | 3                     | 0                | 0                 | 0                 | 3                 | 0                |
| B6a1a    | 1                | 0                 | 0                | 0                 | 0               | 0                | 0                | 0                 | 0               | 0                  | 0               | 0                 | 0                | 27                | 9                 | 0                 | 0                | 0                     | 0                | 0                 | 0                 | 0                 | 0                |
| U1a1c1a  | 1                | 0                 | 1                | 0                 | 0               | 0                | 0                | 0                 | 0               | 0                  | 0               | 0                 | 0                | 0                 | 0                 | 1                 | 0                | 0                     | 0                | 0                 | 0                 | 0                 | 0                |
| U2c1     | 1                | NA                | 0                | NA                | 0               | NA               | 0                | NA                | 0               | NA                 | 0               | NA                | 0                | NA                | 0                 | NA                | 1                | NA                    | 0                | NA                | 0                 | NA                | 0                |
| U2e1h    | 3                | 3                 | 0                | 4                 | 0               | 0                | 0                | 0                 | 0               | 0                  | 0               | 5                 | 0                | 0                 | 0                 | 9                 | 4                | 6                     | 8                | 1                 | 1                 | 0                 | 0                |
| U4a1     | 1                | 0                 | 0                | 2                 | 0               | 0                | 0                | 0                 | 0               | 0                  | 0               | 52                | 1                | 0                 | 0                 | 3                 | 7                | 16                    | 4                | 9                 | 21                | 0                 | 0                |
| U7a      | 1                | 31                | 0                | 4                 | 0               | 1                | 0                | 0                 | 0               | 0                  | 0               | 23                | 0                | 4                 | 0                 | 79                | 2                | 60                    | 8                | 2                 | 0                 | 0                 | 0                |
| U7a3b    | 1                | 0                 | 0                | 0                 | 0               | 0                | 0                | 0                 | 0               | 0                  | 0               | 0                 | 0                | 4                 | 0                 | 5                 | 3                | 2                     | 4                | 0                 | 0                 | 0                 | 0                |
| H15a1    | 1                | NA                | 0                | NA                | 0               | NA               | 0                | NA                | 0               | NA                 | 0               | NA                | 0                | NA                | 0                 | NA                | 0                | NA                    | 2                | NA                | 2                 | NA                | 0                |
| H2       | 2                | NA                | 0                | NA                | 0               | NA               | 0                | NA                | 0               | NA                 | 0               | NA                | 0                | NA                | 0                 | NA                | 7                | NA                    | 35               | NA                | 0                 | NA                | 0                |
| H7b2     | 2                | NA                | 0                | NA                | 0               | NA               | 0                | NA                | 0               | NA                 | 0               | NA                | 0                | NA                | 0                 | NA                | 0                | NA                    | 0                | NA                | 7                 | NA                | 0                |
| H101     | 1                | 0                 | 0                | 0                 | 0               | 0                | 1                | 0                 | 0               | 0                  | 0               | 6                 | 0                | 0                 | 0                 | 0                 | 2                | 14                    | 4                | 0                 | 0                 | 0                 | 0                |
| H14      | 1                | 0                 | 0                | 0                 | 0               | 0                | 0                | 0                 | 0               | 0                  | 0               | 0                 | 0                | 0                 | 4                 | 0                 | 1                | 6                     | 8                | 1                 | 8                 | 0                 | 0                |
| HV19     | 1                | 4                 | 0                | 0                 | 0               | 0                | 0                | 0                 | 0               | 0                  | 0               | 0                 | 0                | 0                 | 0                 | 0                 | 0                | 2                     | 0                | 0                 | 0                 | 0                 | 0                |
| F1a1a1   | 1                | NA                | 0                | NA                | 0               | NA               | 0                | NA                | 0               | NA                 | 0               | NA                | 0                | NA                | 72                | NA                | 0                | NA                    | 0                | NA                | 0                 | NA                | 0                |
| F1a1c    | 1                | NA                | 0                | NA                | 1               | NA               | 3                | NA                | 0               | NA                 | 1               | NA                | 0                | NA                | 0                 | NA                | 1                | NA                    | 0                | NA                | 0                 | NA                | 1                |

|           | Tibet            |                   |                  | Northwest China   |                 | North China      |                  | South China       |                 | Southwestern China |                 | North Asia        |                  | Southeast Asia    |                   | South Asia        |                  | Central and West Asia |                  | Western Eurasia   |                   | Japan and Korea   |                  |
|-----------|------------------|-------------------|------------------|-------------------|-----------------|------------------|------------------|-------------------|-----------------|--------------------|-----------------|-------------------|------------------|-------------------|-------------------|-------------------|------------------|-----------------------|------------------|-------------------|-------------------|-------------------|------------------|
|           | 671 (This study) | 7481 <sup>a</sup> | 201 <sup>b</sup> | 1195 <sup>a</sup> | 53 <sup>b</sup> | 975 <sup>a</sup> | 232 <sup>b</sup> | 3975 <sup>a</sup> | 97 <sup>b</sup> | 3530 <sup>a</sup>  | 98 <sup>b</sup> | 4688 <sup>a</sup> | 832 <sup>b</sup> | 8040 <sup>a</sup> | 1266 <sup>b</sup> | 6832 <sup>a</sup> | 688 <sup>b</sup> | 4543 <sup>a</sup>     | 997 <sup>b</sup> | 1042 <sup>a</sup> | 4535 <sup>b</sup> | 2188 <sup>a</sup> | 790 <sup>b</sup> |
| F1c1a     | 3                | 138               | 1                | 14                | 0               | 7                | 0                | 0                 | 1               | 6                  | 0               | 1                 | 0                | 3                 | 4                 | 3                 | 2                | 1                     | 0                | 0                 | 0                 | 2                 | 0                |
| F1c1a1a†  | 18               | NA                | 2                | NA                | 0               | NA               | 0                | NA                | 0               | NA                 | 0               | NA                | 0                | NA                | 0                 | NA                | 0                | NA                    | 0                | NA                | 0                 | NA                | 0                |
| F1b1      | 7                | NA                | 1                | NA                | 0               | NA               | 1                | NA                | 0               | NA                 | 0               | NA                | 0                | NA                | 0                 | NA                | 0                | NA                    | 4                | NA                | 0                 | NA                | 2                |
| F1b1c     | 4                | 35                | 0                | 4                 | 0               | 3                | 0                | 0                 | 0               | 17                 | 0               | 14                | 0                | 2                 | 0                 | 6                 | 1                | 4                     | 0                | 0                 | 0                 | 1                 | 0                |
| F1d       | 7                | NA                | 1                | NA                | 0               | NA               | 3                | NA                | 1               | NA                 | 0               | NA                | 0                | NA                | 1                 | NA                | 0                | NA                    | 1                | NA                | 0                 | NA                | 1                |
| F1d1      | 11               | NA                | 0                | NA                | 0               | NA               | 1                | NA                | 0               | NA                 | 0               | NA                | 0                | NA                | 1                 | NA                | 0                | NA                    | 0                | NA                | 0                 | NA                | 1                |
| F1d1a1    | 3                | 4                 | 0                | 0                 | 0               | 0                | 0                | 0                 | 0               | 0                  | 0               | 0                 | 0                | 0                 | 0                 | 7                 | 0                | 1                     | 0                | 0                 | 0                 | 0                 | 0                |
| F1d1a2†   | 8                | 5                 | 0                | 0                 | 0               | 0                | 0                | 0                 | 0               | 0                  | 0               | 0                 | 0                | 0                 | 0                 | 0                 | 0                | 0                     | 0                | 0                 | 0                 | 0                 | 0                |
| F1d2†     | 7                | NA                | 1                | NA                | 0               | NA               | 0                | NA                | 0               | NA                 | 0               | NA                | 0                | NA                | 0                 | NA                | 0                | NA                    | 0                | NA                | 0                 | NA                | 0                |
| F1g†      | 21               | NA                | 0                | NA                | 0               | NA               | 1                | NA                | 1               | NA                 | 0               | NA                | 0                | NA                | 5                 | NA                | 1                | NA                    | 1                | NA                | 0                 | NA                | 0                |
| F1g1†     | 2                | NA                | 1                | NA                | 0               | NA               | 0                | NA                | 0               | NA                 | 1               | NA                | 0                | NA                | 0                 | NA                | 0                | NA                    | 0                | NA                | 0                 | NA                | 0                |
| F1g2†     | 3                | NA                | 0                | NA                | 0               | NA               | 0                | NA                | 0               | NA                 | 0               | NA                | 0                | NA                | 0                 | NA                | 0                | NA                    | 0                | NA                | 0                 | NA                | 0                |
| F2a1      | 1                | 0                 | 0                | 4                 | 0               | 2                | 1                | 0                 | 0               | 29                 | 0               | 0                 | 0                | 8                 | 0                 | 0                 | 0                | 0                     | 0                | 0                 | 0                 | 0                 | 0                |
| F2b1      | 1                | 0                 | 0                | 1                 | 1               | 3                | 4                | 25                | 0               | 7                  | 0               | 9                 | 1                | 8                 | 4                 | 3                 | 0                | 9                     | 0                | 0                 | 0                 | 2                 | 0                |
| F2g       | 0                | NA                | 0                | NA                | 0               | NA               | 0                | NA                | 0               | NA                 | 0               | NA                | 0                | NA                | 0                 | NA                | 1                | NA                    | 0                | NA                | 0                 | NA                | 0                |
| F2g1a     | 3                | 3                 | 0                | 5                 | 0               | 0                | 0                | 0                 | 0               | 10                 | 0               | 0                 | 0                | 15                | 0                 | 0                 | 0                | 0                     | 0                | 0                 | 0                 | 0                 | 0                |
| F2c1      | 1                | 1                 | 0                | 0                 | 0               | 0                | 1                | 0                 | 0               | 0                  | 0               | 0                 | 0                | 0                 | 0                 | 0                 | 0                | 0                     | 0                | 0                 | 0                 | 0                 | 0                |
| K1a4      | 1                | NA                | 0                | NA                | 0               | NA               | 0                | NA                | 0               | NA                 | 0               | NA                | 0                | NA                | 1                 | NA                | 0                | NA                    | 11               | NA                | 54                | NA                | 0                |
| T1a1      | 1                | NA                | 0                | NA                | 0               | NA               | 0                | NA                | 0               | NA                 | 0               | NA                | 0                | NA                | 0                 | NA                | 3                | NA                    | 7                | NA                | 5                 | NA                | 0                |
| T1a1b1    | 1                | NA                | 0                | NA                | 0               | NA               | 0                | NA                | 0               | NA                 | 0               | NA                | 0                | NA                | 0                 | NA                | 0                | NA                    | 8                | NA                | 5                 | NA                | 0                |
| M8a1      | 2                | NA                | 0                | NA                | 0               | NA               | 0                | NA                | 0               | NA                 | 0               | NA                | 4                | NA                | 0                 | NA                | 0                | NA                    | 0                | NA                | 0                 | NA                | 0                |
| M8a2a1    | 1                | 0                 | 0                | 1                 | 0               | 1                | 2                | 0                 | 1               | 11                 | 0               | 0                 | 0                | 5                 | 5                 | 0                 | 0                | 2                     | 0                | 0                 | 0                 | 0                 | 1                |
| C4a1a1a   | 12               | NA                | 0                | NA                | 0               | NA               | 0                | NA                | 0               | NA                 | 0               | NA                | 0                | NA                | 0                 | NA                | 2                | NA                    | 6                | NA                | 9                 | NA                | 0                |
| C4a2b†    | 5                | NA                | 1                | NA                | 0               | NA               | 0                | NA                | 0               | NA                 | 0               | NA                | 0                | NA                | 0                 | NA                | 0                | NA                    | 0                | NA                | 0                 | NA                | 0                |
| C4a2b2†   | 2                | 39                | 15               | 2                 | 0               | 0                | 1                | 0                 | 0               | 11                 | 0               | 1                 | 0                | 10                | 0                 | 10                | 0                | 0                     | 0                | 0                 | 0                 | 0                 | 0                |
| C4a2c     | 2                | NA                | 0                | NA                | 0               | NA               | 0                | NA                | 0               | NA                 | 0               | NA                | 1                | NA                | 0                 | NA                | 0                | NA                    | 2                | NA                | 0                 | NA                | 0                |
| C4a2c1    | 1                | 1                 | 0                | 0                 | 0               | 1                | 0                | 0                 | 0               | 0                  | 0               | 7                 | 0                | 0                 | 0                 | 9                 | 11               | 9                     | 1                | 0                 | 0                 | 1                 | 0                |
| C4a2c2    | 2                | 5                 | 0                | 2                 | 0               | 1                | 0                | 4                 | 0               | 0                  | 0               | 2                 | 0                | 1                 | 0                 | 1                 | 6                | 1                     | 0                | 0                 | 0                 | 0                 | 0                |
| C4a2c3†   | 3                | NA                | 0                | NA                | 0               | NA               | 0                | NA                | 0               | NA                 | 0               | NA                | 0                | NA                | 0                 | NA                | 0                | NA                    | 0                | NA                | 0                 | NA                | 0                |
| C4b1      | 1                | NA                | 0                | NA                | 0               | NA               | 0                | NA                | 0               | NA                 | 0               | NA                | 37               | NA                | 0                 | NA                | 0                | NA                    | 5                | NA                | 0                 | NA                | 0                |
| C4d       | 6                | NA                | 2                | NA                | 0               | NA               | 1                | NA                | 0               | NA                 | 0               | NA                | 0                | NA                | 2                 | NA                | 0                | NA                    | 0                | NA                | 0                 | NA                | 0                |
| C7        | 1                | NA                | 0                | NA                | 0               | NA               | 0                | NA                | 0               | NA                 | 0               | NA                | 2                | NA                | 8                 | NA                | 0                | NA                    | 0                | NA                | 0                 | NA                | 0                |
| C7a       | 2                | NA                | 1                | NA                | 0               | NA               | 1                | NA                | 0               | NA                 | 4               | NA                | 0                | NA                | 7                 | NA                | 0                | NA                    | 0                | NA                | 0                 | NA                | 0                |
| C7a1      | 1                | NA                | 0                | NA                | 0               | NA               | 0                | NA                | 1               | NA                 | 1               | NA                | 2                | NA                | 8                 | NA                | 0                | NA                    | 0                | NA                | 0                 | NA                | 0                |
| C7b       | 1                | NA                | 0                | NA                | 0               | NA               | 0                | NA                | 0               | NA                 | 0               | NA                | 0                | NA                | 0                 | NA                | 2                | NA                    | 0                | NA                | 0                 | NA                | 0                |
| Z3a       | 5                | NA                | 0                | NA                | 1               | NA               | 0                | NA                | 0               | NA                 | 0               | NA                | 0                | NA                | 2                 | NA                | 0                | NA                    | 0                | NA                | 0                 | NA                | 0                |
| Z3a1a     | 3                | NA                | 0                | NA                | 1               | NA               | 1                | NA                | 0               | NA                 | 0               | NA                | 0                | NA                | 1                 | NA                | 0                | NA                    | 0                | NA                | 0                 | NA                | 0                |
| Z4a       | 1                | 26                | 1                | 4                 | 1               | 3                | 1                | 3                 | 2               | 13                 | 0               | 0                 | 0                | 1                 | 0                 | 0                 | 0                | 3                     | 0                | 0                 | 0                 | 4                 | 1                |
| Z7        | 2                | NA                | 1                | NA                | 0               | NA               | 0                | NA                | 0               | NA                 | 0               | NA                | 0                | NA                | 0                 | NA                | 5                | NA                    | 0                | NA                | 0                 | NA                | 0                |
| D4        | 3                | NA                | 1                | NA                | 2               | NA               | 0                | NA                | 1               | NA                 | 0               | NA                | 3                | NA                | 9                 | NA                | 1                | NA                    | 4                | NA                | 0                 | NA                | 3                |
| D4b2b     | 2                | NA                | 0                | NA                | 0               | NA               | 1                | NA                | 0               | NA                 | 1               | NA                | 2                | NA                | 1                 | NA                | 0                | NA                    | 1                | NA                | 0                 | NA                | 0                |
| D4b2b8    | 9                | NA                | 0                | NA                | 0               | NA               | 0                | NA                | 0               | NA                 | 0               | NA                | 0                | NA                | 0                 | NA                | 0                | NA                    | 0                | NA                | 0                 | NA                | 1                |
| D4b2b9    | 4                | NA                | 0                | NA                | 0               | NA               | 0                | NA                | 0               | NA                 | 0               | NA                | 0                | NA                | 0                 | NA                | 0                | NA                    | 0                | NA                | 0                 | NA                | 0                |
| D4b2b10   | 4                | NA                | 0                | NA                | 0               | NA               | 0                | NA                | 0               | NA                 | 0               | NA                | 0                | NA                | 0                 | NA                | 0                | NA                    | 0                | NA                | 0                 | NA                | 0                |
| D4g2a1c1† | 3                | NA                | 0                | NA                | 0               | NA               | 1                | NA                | 1               | NA                 | 2               | NA                | 0                | NA                | 6                 | NA                | 0                | NA                    | 0                | NA                | 0                 | NA                | 0                |
| D4h1c2a†  | 5                | 24                | 0                | 2                 | 0               | 2                | 0                | 1                 | 0               | 2                  | 0               | 0                 | 0                | 0                 | 0                 | 1                 | 0                | 1                     | 0                | 0                 | 0                 | 4                 | 0                |
| D4h4      | 1                | 0                 | 0                | 0                 | 0               | 1                | 0                | 0                 | 0               | 0                  | 0               | 2                 | 2                | 0                 | 0                 | 0                 | 0                | 0                     | 2                | 0                 | 0                 | 0                 | 1                |
| D4i       | 1                | 25                | 0                | 7                 | 1               | 5                | 1                | 6                 | 1               | 8                  | 0               | 10                | 0                | 0                 | 0                 | 0                 | 0                | 9                     | 0                | 0                 | 0                 | 5                 | 2                |
| D4j1a1    | 1                | NA                | 1                | NA                | 0               | NA               | 1                | NA                | 0               | NA                 | 0               | NA                | 4                | NA                | 8                 | NA                | 0                | NA                    | 1                | NA                | 0                 | NA                | 0                |



|              | Tibet            |                   | Northwest China  |                   | North China     |                  | South China      |                   | Southwestern China |                   | North Asia      |                   | Southeast Asia   |                   | South Asia        |                   | Central and West Asia |                   | Western Eurasia  |                   | Japan and Korea   |                   |                  |
|--------------|------------------|-------------------|------------------|-------------------|-----------------|------------------|------------------|-------------------|--------------------|-------------------|-----------------|-------------------|------------------|-------------------|-------------------|-------------------|-----------------------|-------------------|------------------|-------------------|-------------------|-------------------|------------------|
|              | 671 (This study) | 7481 <sup>a</sup> | 201 <sup>b</sup> | 1195 <sup>a</sup> | 53 <sup>b</sup> | 975 <sup>a</sup> | 232 <sup>b</sup> | 3975 <sup>a</sup> | 97 <sup>b</sup>    | 3530 <sup>a</sup> | 98 <sup>b</sup> | 4688 <sup>a</sup> | 832 <sup>b</sup> | 8040 <sup>a</sup> | 1266 <sup>b</sup> | 6832 <sup>a</sup> | 688 <sup>b</sup>      | 4543 <sup>a</sup> | 997 <sup>b</sup> | 1042 <sup>a</sup> | 4535 <sup>b</sup> | 2188 <sup>a</sup> | 790 <sup>b</sup> |
| M9a1a1c1b1a† | 100              | NA                | 25               | NA                | 0               | NA               | 0                | NA                | 0                  | NA                | 0               | NA                | 1                | NA                | 0                 | NA                | 10                    | NA                | 0                | NA                | 0                 | NA                | 0                |
| M9a1a1c1b1a  | 2                | NA                | 3                | NA                | 0               | NA               | 0                | NA                | 0                  | NA                | 0               | NA                | 0                | NA                | 0                 | NA                | 1                     | NA                | 0                | NA                | 0                 | NA                | 0                |
| M9a1a1c1b1a  | 9                | NA                | 1                | NA                | 0               | NA               | 0                | NA                | 0                  | NA                | 0               | NA                | 0                | NA                | 0                 | NA                | 3                     | NA                | 0                | NA                | 0                 | NA                | 0                |
| M9a1a2†      | 5                | 38                | 1                | 3                 | 0               | 1                | 0                | 0                 | 0                  | 5                 | 0               | 0                 | 0                | 3                 | 0                 | 24                | 0                     | 0                 | 0                | 0                 | 0                 | 0                 | 0                |
| M9a1b        | 3                | NA                | 1                | NA                | 0               | NA               | 0                | NA                | 0                  | NA                | 0               | NA                | 0                | NA                | 0                 | NA                | 0                     | NA                | 0                | NA                | 0                 | NA                | 0                |
| M9a1b1       | 14               | 359               | 3                | 17                | 0               | 0                | 0                | 1                 | 0                  | 28                | 0               | 2                 | 1                | 29                | 1                 | 63                | 1                     | 2                 | 0                | 0                 | 0                 | 0                 | 0                |
| M9a1b1c†     | 15               | NA                | 4                | NA                | 0               | NA               | 0                | NA                | 0                  | NA                | 0               | NA                | 0                | NA                | 0                 | NA                | 0                     | NA                | 0                | NA                | 0                 | NA                | 0                |
| M9a1b1d      | 6                | NA                | 1                | NA                | 0               | NA               | 0                | NA                | 0                  | NA                | 0               | NA                | 0                | NA                | 0                 | NA                | 0                     | NA                | 0                | NA                | 0                 | NA                | 0                |
| M9a1b1e      | 8                | NA                | 0                | NA                | 0               | NA               | 0                | NA                | 0                  | NA                | 0               | NA                | 0                | NA                | 0                 | NA                | 7                     | NA                | 0                | NA                | 0                 | NA                | 0                |
| M9a1b2       | 3                | NA                | 0                | NA                | 0               | NA               | 0                | NA                | 0                  | NA                | 0               | NA                | 2                | NA                | 0                 | NA                | 0                     | NA                | 0                | NA                | 0                 | NA                | 0                |

Note: <sup>a</sup>HVS dataset

<sup>b</sup>Complete mitogenome dataset.

<sup>c</sup>NA means this haplogroup is defined by coding-region variants, thus cannot be searched in the HVS dataset.

**Table S8. Coalescent ages of haplogroups with *de novo* differentiations in Tibetans.**

|          | Number of samples for calculation | Number of Tibetan samples (including Sherpa) | Number of Tibetan samples in this study | Coding Region (Soares et al. 2009) |                     |                  | Synonymous Positions (Soares et al. 2009; Complete Genome (Soares et al. 2009 |                     |                  |                     |                     |                  | Period†     |
|----------|-----------------------------------|----------------------------------------------|-----------------------------------------|------------------------------------|---------------------|------------------|-------------------------------------------------------------------------------|---------------------|------------------|---------------------|---------------------|------------------|-------------|
|          |                                   |                                              |                                         | Age (lower; upper)                 | $\rho$ ( $\sigma$ ) | $\rho/n\sigma^2$ | Age (lower; upper)                                                            | $\rho$ ( $\sigma$ ) | $\rho/n\sigma^2$ | Age (lower; upper)  | $\rho$ ( $\sigma$ ) | $\rho/n\sigma^2$ |             |
| A6b      | 5                                 | 5                                            | 1                                       | 4.24 (2.51; 5.97)                  | 1.2(0.49)           | 1.00             | 7.87 (4.33; 11.41)                                                            | 1(0.45)             | 0.99             | 6.20 (4.14; 8.27)   | 2.4(0.8)            | 0.75             | Paleolithic |
| A11a1a‡  | 47                                | 42                                           | 29                                      | 5.11 (4.37; 5.86)                  | 1.45(0.21)          | 0.73             | 4.25 (3.23; 5.27)                                                             | 0.54(0.13)          | 0.67             | 8.03 (5.82; 10.24)  | 3.11 (0.85)         | 0.09             | Neolithic   |
| A11a1a1  | 3                                 | 1                                            | 1                                       | 5.90 (2.37; 9.43)                  | 1.67(1.00)          | 0.56             | 5.27 (0.00; 10.55)                                                            | 0.67(0.67)          | 0.50             | 6.02 (3.15; 8.89)   | 2.33(1.11)          | 0.63             | Neolithic   |
| A11a1a2  | 3                                 | 3                                            | 0                                       | 4.70 (1.80; 7.60)                  | 1.33(0.82)          | 0.66             | 2.60 (0.00; 5.20)                                                             | 0.33(0.33)          | 1.01             | 6.90 (3.93; 9.87)   | 2.67(1.15)          | 0.67             | Neolithic   |
| A11a1a3  | 3                                 | 3                                            | 3                                       | 4.70 (3.53; 5.86)                  | 1.33(0.33)          | 4.07             | 0.00 (0.00; 0.00)                                                             | 0.00(0.00)          | -                | 3.44 (1.71; 5.17)   | 1.33(0.67)          | 0.99             | Neolithic   |
| A11a1a4  | 3                                 | 3                                            | 3                                       | 2.37 (0.71; 4.03)                  | 0.67(0.47)          | 1.01             | 2.60 (0.00; 5.20)                                                             | 0.33(0.33)          | 1.01             | 3.44 (1.32; 5.56)   | 1.33(0.82)          | 0.66             | Neolithic   |
| A14a     | 6                                 | 6                                            | 6                                       | 8.83 (4.88; 12.79)                 | 2.5(1.12)           | 0.33             | 14.41 (7.32; 21.49)                                                           | 1.83(0.9)           | 0.38             | 9.05 (5.58; 12.51)  | 3.5(1.34)           | 0.32             | Paleolithic |
| A14a1    | 4                                 | 4                                            | 4                                       | 0.88 (0.00; 1.77)                  | 0.25(0.25)          | 1.00             | 1.97 (0.00; 3.94)                                                             | 0.25(0.25)          | 1.00             | 1.94 (0.49; 3.39)   | 0.75(0.56)          | 0.60             | Neolithic   |
| A14b1    | 3                                 | 3                                            | 3                                       | 0.00 (0.00; 0.00)                  | 0.00(0.00)          | -                | 0.00 (0.00; 0.00)                                                             | 0.00(0.00)          | -                | 0.00 (0.00; 0.00)   | 0.00(0.00)          | -                | Neolithic   |
| A15a‡    | 9                                 | 8                                            | 7                                       | 4.71(2.33;7.07)                    | 1.33(0.67)          | 0.33             | 8.76 (3.78; 13.70)                                                            | 1.11(0.63)          | 0.31             | 5.17 (2.92; 7.42)   | 2(0.87)             | 0.29             | Neolithic   |
| A15c     | 20                                | 20                                           | 5                                       | 14.66 (8.55; 20.77)                | 4.15(1.73)          | 0.07             | 9.84 (2.28; 17.40)                                                            | 1.25(0.96)          | 0.07             | 14.48 (9.54; 19.41) | 5.6(1.91)           | 0.08             | Paleolithic |
| A15c1    | 15                                | 15                                           | 1                                       | 2.37 (1.20; 3.53)                  | 0.67(0.33)          | 0.41             | 2.13 (0.87; 3.38)                                                             | 0.27(0.16)          | 0.70             | 4.99 (2.25; 7.73)   | 1.93(1.06)          | 0.11             | Neolithic   |
| A15c2    | 4                                 | 4                                            | 4                                       | 2.65 (1.13; 4.17)                  | 0.75(0.43)          | 1.01             | 1.97 (0.00; 3.94)                                                             | 0.25(0.25)          | 1.00             | 4.52 (2.20; 6.85)   | 1.75(0.9)           | 0.54             | Neolithic   |
| A17a2    | 3                                 | 3                                            | 3                                       | 3.53 (0.88; 6.18)                  | 1(0.75)             | 0.59             | 0.00 (0.00; 0.00)                                                             | 0(0)                | -                | 7.76 (4.21; 11.30)  | 3(1.37)             | 0.53             | Neolithic   |
| A21‡     | 20                                | 17                                           | 14                                      | 2.82(1.97; 3.68)                   | 0.80(0.24)          | 1.70             | 4.40 (3.16; 5.64)                                                             | 1.70(0.48)          | 0.75             | 5.91 (4.04; 7.78)   | 0.75(0.23)          | 0.71             | Neolithic   |
| A21a     | 7                                 | 5                                            | 3                                       | 2.02(0.78;3.25)                    | 0.57(0.35)          | 0.71             | 1.85 (0.87; 2.83)                                                             | 0.71(0.38)          | 0.43             | 3.78 (0.86; 5.97)   | 0.43(0.32)          | 0.60             | Neolithic   |
| A21b     | 10                                | 9                                            | 9                                       | 2.82(1.59;4.06)                    | 0.8(0.35)           | 2.40             | 6.20 (3.90; 8.50)                                                             | 2.4(0.89)           | 0.50             | 3.94 (1.89; 5.99)   | 0.5(0.26)           | 0.74             | Neolithic   |
| A21b1    | 7                                 | 7                                            | 7                                       | 3.03(1.62;4.45)                    | 0.86(0.4)           | 2.00             | 5.17 (3.28; 7.06)                                                             | 2(0.73)             | 0.43             | 3.38 (1.42; 5.36)   | 0.43(0.25)          | 0.98             | Neolithic   |
| A21b1a   | 3                                 | 3                                            | 3                                       | 2.35(0;4.73)                       | 0.67(0.67)          | 2.00             | 5.17 (2.19; 8.14)                                                             | 2(1.15)             | 0.00             | 0 (0; 0)            | 0(0)                | -                | Neolithic   |
| A21c     | 3                                 | 3                                            | 2                                       | 4.71(2.33;7.07)                    | 1.33(0.67)          | 1.67             | 4.32 (2.38; 6.26)                                                             | 1.67(0.75)          | 0.33             | 2.60 (0; 5.20)      | 0.33(0.33)          | 1.01             | Neolithic   |
| B4d4     | 4                                 | 4                                            | 4                                       | 4.42 (2.44; 6.39)                  | 1.25(0.56)          | 1.00             | 5.90 (2.52; 9.29)                                                             | 0.75(0.43)          | 1.01             | 6.46 (4.21; 8.71)   | 2.5(0.87)           | 0.83             | Neolithic   |
| C4a1a1a  | 17                                | 12                                           | 12                                      | 4.77 (3.39; 6.15)                  | 1.35(0.39)          | 0.52             | 5.59 (3.07; 8.11)                                                             | 0.71(0.32)          | 0.41             | 6.85 (5.17; 8.53)   | 2.65(0.65)          | 0.37             | Neolithic   |
| C4a1a1a1 | 6                                 | 4                                            | 4                                       | 5.30 (2.86; 7.74)                  | 1.5(0.69)           | 0.53             | 6.53 (2.60; 10.47)                                                            | 0.83(0.5)           | 0.55             | 3.88 (2.09; 5.66)   | 1.5(0.69)           | 0.53             | Neolithic   |
| C4a1a1a2 | 4                                 | 4                                            | 4                                       | 2.65 (1.13; 4.17)                  | 0.75(0.43)          | 1.01             | 0.00 (0.00; 0.00)                                                             | 0(0)                | -                | 3.88 (2.30; 5.45)   | 1.5(0.61)           | 1.01             | Neolithic   |
| C4a1a1a3 | 5                                 | 3                                            | 3                                       | 3.53 (1.66; 5.41)                  | 1(0.53)             | 0.71             | 3.15 (0.00; 6.30)                                                             | 0.4(0.4)            | 0.50             | 5.69 (3.57; 7.81)   | 2.2(0.82)           | 0.65             | Neolithic   |
| C4a2b    | 26                                | 19                                           | 5                                       | 13.18 (8.48; 17.88)                | 3.73(1.33)          | 0.08             | 18.74 (10.86; 26.61)                                                          | 2.38(1)             | 0.09             | 13.31 (9.31; 17.32) | 5.15(1.55)          | 0.08             | Paleolithic |
| C4a2b2   | 20                                | 15                                           | 1                                       | 8.13 (4.66; 11.59)                 | 2.3(0.98)           | 0.12             | 13.78 (7.40; 20.15)                                                           | 1.75(0.81)          | 0.13             | 7.37 (4.78; 9.95)   | 2.85(1)             | 0.14             | Paleolithic |
| C4a2b2a  | 11                                | 11                                           | 0                                       | 0.32 (0.00; 0.64)                  | 0.09(0.09)          | 1.01             | 0.71 (0.00; 1.42)                                                             | 0.09(0.09)          | 1.01             | 1.16 (0.65; 1.68)   | 0.45(0.2)           | 1.02             | Neolithic   |
| C4a2c3‡  | 3                                 | 3                                            | 3                                       | 4.70 (1.80; 7.60)                  | 1.33(0.82)          | 0.66             | 0.00 (0.00; 0.00)                                                             | 0.00(0.00)          | -                | 4.32 (2.04; 6.59)   | 1.67(0.88)          | 0.72             | Neolithic   |
| C4d2     | 8                                 | 8                                            | 6                                       | 3.96 (2.65; 5.26)                  | 1.12(0.37)          | 1.02             | 5.90 (3.46; 8.34)                                                             | 0.75(0.31)          | 0.98             | 4.52 (3.08; 5.97)   | 1.75(0.56)          | 0.70             | Neolithic   |

|           | Number of samples for calculation | Number of Tibetan samples (including Sherpa) | Number of Tibetan samples in this study | Coding Region (Soares et al. 2009) |                     |                  | Synonymous Positions (Soares et al. 2009 Complete Genome (Soares et al. 2009 |                     |                  |                     |                     |                  | Period†     |
|-----------|-----------------------------------|----------------------------------------------|-----------------------------------------|------------------------------------|---------------------|------------------|------------------------------------------------------------------------------|---------------------|------------------|---------------------|---------------------|------------------|-------------|
|           |                                   |                                              |                                         | Age (lower; upper)                 | $\rho$ ( $\sigma$ ) | $\rho/n\sigma^2$ | Age (lower; upper)                                                           | $\rho$ ( $\sigma$ ) | $\rho/n\sigma^2$ | Age (lower; upper)  | $\rho$ ( $\sigma$ ) | $\rho/n\sigma^2$ |             |
| D4b2b8    | 9                                 | 9                                            | 9                                       | 5.51 (3.74; 7.28)                  | 1.56(0.50)          | 0.69             | 10.47 (6.77; 14.17)                                                          | 1.33(0.47)          | 0.67             | 7.76 (5.84; 9.67)   | 3.00(0.74)          | 0.61             | Paleolithic |
| D4b2b8a   | 4                                 | 4                                            | 4                                       | 8.83 (5.51; 12.15)                 | 2.50(0.94)          | 0.71             | 17.71 (10.63; 24.80)                                                         | 2.25(0.90)          | 0.69             | 7.76 (5.17; 10.34)  | 3.00(1.00)          | 0.75             | Paleolithic |
| D4b2b9    | 4                                 | 4                                            | 4                                       | 3.53 (1.77; 5.30)                  | 1(0.5)              | 1.00             | 3.94 (1.18; 6.69)                                                            | 0.5(0.35)           | 1.02             | 2.59 (1.29; 3.88)   | 1(0.5)              | 1.00             | Neolithic   |
| D4b2b10   | 4                                 | 4                                            | 4                                       | 4.42 (2.08; 6.75)                  | 1.25(0.66)          | 0.72             | 7.87 (3.07; 12.67)                                                           | 1(0.61)             | 0.67             | 5.82 (3.67; 7.96)   | 2.25(0.83)          | 0.82             | Neolithic   |
| D4g2a1c1‡ | 3                                 | 3                                            | 3                                       | 4.70 (2.33; 7.07)                  | 1.33(0.67)          | 0.99             | 2.60 (0.00; 5.20)                                                            | 0.33(0.33)          | 1.01             | 4.32 (2.38; 6.26)   | 1.67(0.75)          | 0.99             | Neolithic   |
| D4h1c2a   | 5                                 | 5                                            | 5                                       | 9.89 (6.15; 13.64)                 | 2.80(1.06)          | 0.50             | 14.17 (7.71; 20.62)                                                          | 1.80(0.82)          | 0.54             | 10.86 (7.32; 14.40) | 4.20(1.37)          | 0.45             | Paleolithic |
| D4h1c2a1  | 3                                 | 3                                            | 3                                       | 1.17 (0.00; 2.33)                  | 0.33(0.33)          | 1.01             | 2.60 (0.00; 5.20)                                                            | 0.33(0.33)          | 1.01             | 0.85 (0.00; 1.71)   | 0.33(0.33)          | 1.01             | Neolithic   |
| D4j1a1c   | 3                                 | 3                                            | 2                                       | 2.37 (0.71; 4.03)                  | 0.67(0.47)          | 1.01             | 0.00 (0.00; 0.00)                                                            | 0(0)                | -                | 1.73 (0.52; 2.95)   | 0.67(0.47)          | 1.01             | Neolithic   |
| D4j1a1d   | 8                                 | 7                                            | 5                                       | 4.03 (2.01; 6.04)                  | 1.14(0.57)          | 0.50             | 6.77 (2.60; 10.94)                                                           | 0.86(0.53)          | 0.44             | 4.06 (2.38; 5.74)   | 1.57(0.65)          | 0.53             | Neolithic   |
| D4j1a1d1  | 3                                 | 2                                            | 2                                       | 2.37 (0.00; 4.73)                  | 0.67(0.67)          | 0.50             | 5.27 (0.00; 10.55)                                                           | 0.67(0.67)          | 0.50             | 1.73 (0.00; 3.46)   | 0.67(0.67)          | 0.50             | Neolithic   |
| D4j1a1e   | 5                                 | 5                                            | 5                                       | 0.00 (0.00; 0.00)                  | 0(0)                | -                | 0.00 (0.00; 0.00)                                                            | 0(0)                | -                | 0.52 (0.00; 1.03)   | 0.2(0.2)            | 1.00             | Neolithic   |
| D4j1a1f‡  | 7                                 | 6                                            | 6                                       | 4.56 (3.04; 6.08)                  | 1.29(0.43)          | 1.00             | 5.59 (3.07; 8.11)                                                            | 0.71(0.32)          | 0.99             | 4.42 (3.05; 5.79)   | 1.71(0.53)          | 0.87             | Neolithic   |
| D4j3b     | 14                                | 14                                           | 14                                      | 3.04 (1.91; 4.17)                  | 0.86(0.32)          | 0.60             | 1.65 (0.39; 2.91)                                                            | 0.21(0.16)          | 0.59             | 4.42 (3.23; 5.61)   | 1.71(0.46)          | 0.58             | Neolithic   |
| D4j3b1    | 3                                 | 3                                            | 3                                       | 2.37 (0.00; 4.73)                  | 0.67(0.67)          | 0.50             | 0.00 (0.00; 0.00)                                                            | 0(0)                | -                | 2.59 (0.65; 4.52)   | 1(0.75)             | 0.59             | Neolithic   |
| D4s       | 8                                 | 5                                            | 4                                       | 8.83 (5.19; 12.47)                 | 2.5(1.03)           | 0.29             | 6.85 (4.25; 9.45)                                                            | 0.87(0.33)          | 1.00             | 9.69 (6.67; 12.72)  | 3.75(1.17)          | 0.34             | Paleolithic |
| D4s1‡     | 7                                 | 4                                            | 4                                       | 4.56 (2.61; 6.50)                  | 1.29(0.55)          | 0.61             | 4.49 (2.20; 6.77)                                                            | 0.57(0.29)          | 0.97             | 6.28 (4.16; 8.40)   | 2.43(0.82)          | 0.52             | Neolithic   |
| D4s1a     | 3                                 | 3                                            | 3                                       | 1.17 (0.00; 2.33)                  | 0.33(0.33)          | 1.01             | 2.60 (0.00; 5.20)                                                            | 0.33(0.33)          | 1.01             | 0.85 (0.00; 1.71)   | 0.33(0.33)          | 1.01             | Neolithic   |
| D4s2      | 3                                 | 1                                            | 1                                       | 4.70 (2.33; 7.07)                  | 1.33(0.67)          | 0.99             | 7.87 (3.31; 12.44)                                                           | 1(0.58)             | 0.99             | 6.90 (3.93; 9.87)   | 2.67(1.15)          | 0.67             | Paleolithic |
| D5a2a1c   | 5                                 | 5                                            | 4                                       | 4.24 (2.23; 6.25)                  | 1.2(0.57)           | 0.74             | 1.57 (0.00; 3.15)                                                            | 0.2(0.2)            | 1.00             | 5.69 (3.70; 7.68)   | 2.2(0.77)           | 0.74             | Neolithic   |
| D5a2a1d   | 3                                 | 3                                            | 3                                       | 5.88(2.79;9.01)                    | 1.67(0.88)          | 0.72             | 2.63 (0.00; 5.20)                                                            | 0.33(0.33)          | 1.01             | 7.75 (4.65; 10.86)  | 3(1.2)              | 0.69             | Neolithic   |
| F1b1c     | 6                                 | 4                                            | 4                                       | 6.47 (4.03; 8.90)                  | 1.83(0.69)          | 0.64             | 11.81 (6.69; 16.92)                                                          | 1.50(0.65)          | 0.59             | 8.61 (6.18; 11.04)  | 3.33(0.94)          | 0.63             | Paleolithic |
| F1c1a1a   | 20                                | 22                                           | 21                                      | 3.53 (2.51; 4.56)                  | 1.00(0.29)          | 0.59             | 9.92 (7.24; 12.60)                                                           | 1.26(0.34)          | 0.54             | 5.95 (4.81; 7.08)   | 2.30(0.44)          | 0.59             | Neolithic   |
| F1c1a1a1  | 3                                 | 3                                            | 3                                       | 3.53 (0.88; 6.18)                  | 1.00 (0.75)         | 0.59             | 10.47 (4.01; 16.92)                                                          | 1.33(0.82)          | 0.66             | 2.59 (0.65; 4.52)   | 1.00(0.75)          | 0.59             | Neolithic   |
| F1c1a1a2  | 4                                 | 4                                            | 4                                       | 3.53 (1.77; 5.30)                  | 1.00 (0.50)         | 1.00             | 15.74 (9.53; 21.96)                                                          | 2.00(0.79)          | 0.80             | 4.52 (2.59; 6.46)   | 1.75(0.75)          | 0.78             | Neolithic   |
| F1c1a1a3  | 3                                 | 3                                            | 3                                       | 0.00 (0.00; 0.00)                  | 0.00 (0.00)         | -                | 0.00 (0.00; 0.00)                                                            | 0.00(0.00)          | -                | 0.00 (0.00; 0.00)   | 0.00(0.00)          | -                | Neolithic   |
| F1d1a2    | 8                                 | 8                                            | 8                                       | 5.76 (3.32; 8.20)                  | 1.63(0.69)          | 0.43             | 22.59 (18.34; 26.84)                                                         | 2.87(0.54)          | 1.23             | 8.07 (5.38; 10.75)  | 3.12(1.04)          | 0.36             | Paleolithic |
| F1d1a2a   | 4                                 | 4                                            | 4                                       | 8.83 (4.17; 13.50)                 | 2.50(1.32)          | 0.36             | 11.81 (3.46; 20.15)                                                          | 1.50(1.06)          | 0.33             | 7.11 (-0.10; 14.32) | 2.75(2.79)          | 0.09             | Paleolithic |
| F1d1a2a1  | 3                                 | 3                                            | 3                                       | 0.00 (0.00; 0.00)                  | 0.00(0.00)          | -                | 0.00 (0.00; 0.00)                                                            | 0.00(0.00)          | -                | 0.85 (0.00; 1.71)   | 0.33(0.33)          | 1.01             | Neolithic   |
| F1d2      | 8                                 | 8                                            | 7                                       | 8.37 (6.18; 10.56)                 | 2.37(0.62)          | 0.77             | 9.84 (6.46; 13.22)                                                           | 1.25(0.43)          | 0.85             | 9.69 (7.70; 11.68)  | 3.75(0.77)          | 0.79             | Paleolithic |

|          | Number of samples for calculation | Number of Tibetan samples (including Sherpa) | Number of Tibetan samples in this study | Coding Region (Soares et al. 2009) |                     |                  | Synonymous Positions (Soares et al. 2009) Complete Genome (Soares et al. 2009) |                     |                  |                      |                     |                  | Period†     |
|----------|-----------------------------------|----------------------------------------------|-----------------------------------------|------------------------------------|---------------------|------------------|--------------------------------------------------------------------------------|---------------------|------------------|----------------------|---------------------|------------------|-------------|
|          |                                   |                                              |                                         | Age (lower; upper)                 | $\rho$ ( $\sigma$ ) | $\rho/n\sigma^2$ | Age (lower; upper)                                                             | $\rho$ ( $\sigma$ ) | $\rho/n\sigma^2$ | Age (lower; upper)   | $\rho$ ( $\sigma$ ) | $\rho/n\sigma^2$ |             |
| F1g      | 33                                | 26                                           | 26                                      | 9.12 (7.53; 10.70)                 | 2.58(0.45)          | 0.39             | 12.44 (9.68; 15.19)                                                            | 1.58(0.35)          | 0.39             | 8.12 (6.88; 9.36)    | 3.14(0.48)          | 0.41             | Paleolithic |
| F1g1     | 4                                 | 3                                            | 2                                       | 19.43 (14.59; 24.27)               | 5.5(1.37)           | 0.73             | 27.55 (18.74; 36.37)                                                           | 3.5(1.12)           | 0.70             | 17.45 (13.31; 21.58) | 6.75(1.6)           | 0.66             | Paleolithic |
| F1g2     | 3                                 | 3                                            | 3                                       | 1.17 (0.00; 2.33)                  | 0.33(0.33)          | 1.01             | 2.60 (0.00; 5.20)                                                              | 0.33(0.33)          | 1.01             | 0.85 (0.00; 1.71)    | 0.33(0.33)          | 1.01             | Neolithic   |
| G2a1f2   | 5                                 | 4                                            | 4                                       | 4.95 (2.40; 7.49)                  | 1.4(0.72)           | 0.54             | 9.45 (4.01; 14.88)                                                             | 1.2(0.69)           | 0.50             | 6.20 (3.36; 9.05)    | 2.4(1.1)            | 0.40             | Paleolithic |
| G2a1h1   | 6                                 | 6                                            | 6                                       | 4.13 (2.19; 6.08)                  | 1.17(0.55)          | 0.64             | 0.00 (0.00; 0.00)                                                              | 0(0)                | -                | 6.02 (3.83; 8.22)    | 2.33(0.85)          | 0.54             | Neolithic   |
| G2a1h1a  | 3                                 | 3                                            | 3                                       | 4.70 (1.80; 7.60)                  | 1.33(0.82)          | 0.66             | 0.00 (0.00; 0.00)                                                              | 0(0)                | -                | 5.17 (2.74; 7.60)    | 2(0.94)             | 0.75             | Neolithic   |
| G2b1b    | 17                                | 17                                           | 14                                      | 7.70 (5.62; 9.79)                  | 2.18(0.59)          | 0.37             | 15.27 (10.47; 20.07)                                                           | 1.94(0.61)          | 0.31             | 8.66 (6.54; 10.78)   | 3.35(0.82)          | 0.29             | Paleolithic |
| G2b1b1   | 7                                 | 4                                            | 3                                       | 8.09 (5.16; 11.02)                 | 2.29(0.83)          | 0.47             | 12.36 (6.93; 17.79)                                                            | 1.57(0.69)          | 0.47             | 7.01 (4.76; 9.25)    | 2.71(0.87)          | 0.51             | Paleolithic |
| G2b1b2   | 5                                 | 5                                            | 5                                       | 2.83 (1.41; 4.24)                  | 0.8(0.4)            | 1.00             | 3.15 (0.94; 5.35)                                                              | 0.4(0.28)           | 1.02             | 4.65 (2.27; 7.03)    | 1.8(0.92)           | 0.43             | Neolithic   |
| G2b1b2a  | 4                                 | 4                                            | 4                                       | 3.53 (1.77; 5.30)                  | 1(0.5)              | 1.00             | 3.94 (1.18; 6.69)                                                              | 0.5(0.35)           | 1.02             | 3.23 (1.78; 4.68)    | 1.25(0.56)          | 1.00             | Neolithic   |
| G3a1     | 15                                | 14                                           | 11                                      | 8.23 (4.59; 11.87)                 | 2.33(1.03)          | 0.15             | 4.17 (2.05; 6.30)                                                              | 0.53(0.27)          | 0.48             | 8.61 (5.71; 11.50)   | 3.33(1.12)          | 0.18             | Paleolithic |
| G3a1a    | 14                                | 13                                           | 11                                      | 5.05 (3.39; 6.71)                  | 1.43(0.47)          | 0.46             | 3.94 (1.73; 6.14)                                                              | 0.5(0.28)           | 0.46             | 6.28 (4.60; 7.96)    | 2.43(0.65)          | 0.41             | Neolithic   |
| G3a1a1   | 4                                 | 4                                            | 4                                       | 4.42 (1.48; 7.35)                  | 1.25(0.83)          | 0.45             | 5.90 (0.00; 11.81)                                                             | 0.75(0.75)          | 0.33             | 3.88 (1.63; 6.13)    | 1.5(0.87)           | 0.50             | Neolithic   |
| G3a1a1a  | 3                                 | 3                                            | 3                                       | 2.37 (0.71; 4.03)                  | 0.67(0.47)          | 1.01             | 0.00 (0.00; 0.00)                                                              | 0(0)                | -                | 2.59 (1.09; 4.08)    | 1(0.58)             | 0.99             | Neolithic   |
| G3a1a2   | 4                                 | 4                                            | 4                                       | 5.30 (2.51; 8.09)                  | 1.5(0.79)           | 0.60             | 3.94 (0.00; 7.87)                                                              | 0.5(0.5)            | 0.50             | 3.88 (1.84; 5.92)    | 1.5(0.79)           | 0.60             | Neolithic   |
| G3b      | 15                                | 13                                           | 11                                      | 7.53 (4.80; 10.25)                 | 2.13(0.77)          | 0.24             | 12.04 (6.69; 17.40)                                                            | 1.53(0.68)          | 0.22             | 12.07 (9.07; 15.07)  | 4.67(1.16)          | 0.23             | Paleolithic |
| G3b1     | 9                                 | 7                                            | 6                                       | 3.14 (1.59; 4.70)                  | 0.89(0.44)          | 0.51             | 7.01 (3.54; 10.47)                                                             | 0.89(0.44)          | 0.51             | 6.02 (4.14; 7.91)    | 2.33(0.73)          | 0.49             | Paleolithic |
| G3b1a    | 4                                 | 4                                            | 4                                       | 5.30 (1.98; 8.62)                  | 1.5(0.94)           | 0.42             | 11.81 (4.41; 19.21)                                                            | 1.5(0.94)           | 0.42             | 3.88 (1.45; 6.31)    | 1.5(0.94)           | 0.42             | Neolithic   |
| G3b1a1   | 3                                 | 3                                            | 3                                       | 2.37 (0.00; 4.73)                  | 0.67(0.67)          | 0.50             | 5.27 (0.00; 10.55)                                                             | 0.67(0.67)          | 0.50             | 1.73 (0.00; 3.46)    | 0.67(0.67)          | 0.50             | Neolithic   |
| G3b3     | 5                                 | 5                                            | 5                                       | 4.24 (2.51; 5.97)                  | 1.2(0.49)           | 1.00             | 6.30 (3.15; 9.45)                                                              | 0.8(0.4)            | 1.00             | 6.20 (4.01; 8.40)    | 2.4(0.85)           | 0.66             | Paleolithic |
| G3b3a    | 3                                 | 3                                            | 3                                       | 1.17 (0.00; 2.33)                  | 0.33(0.33)          | 1.01             | 2.60 (0.00; 5.20)                                                              | 0.33(0.33)          | 1.01             | 3.44 (1.71; 5.17)    | 1.33(0.67)          | 0.99             | Neolithic   |
| M11a2    | 10                                | 10                                           | 6                                       | 12.37 (9.26; 15.47)                | 3.5(0.88)           | 0.45             | 11.81 (6.38; 17.24)                                                            | 1.5(0.69)           | 0.32             | 14.48 (11.63; 17.32) | 5.6(1.1)            | 0.46             | Paleolithic |
| M11a2a   | 6                                 | 6                                            | 5                                       | 4.70 (3.04; 6.36)                  | 1.33(0.47)          | 1.00             | 3.94 (1.65; 6.22)                                                              | 0.5(0.29)           | 0.99             | 8.61 (5.95; 11.27)   | 3.33(1.03)          | 0.52             | Neolithic   |
| M11a2a1  | 4                                 | 4                                            | 3                                       | 4.42 (2.44; 6.39)                  | 1.25(0.56)          | 1.00             | 1.97 (0.00; 3.94)                                                              | 0.25(0.25)          | 1.00             | 7.11 (4.45; 9.77)    | 2.75(1.03)          | 0.65             | Neolithic   |
| M11a2a1a | 3                                 | 3                                            | 2                                       | 1.17 (0.00; 2.33)                  | 0.33(0.33)          | 1.01             | 0.00 (0.00; 0.00)                                                              | 0(0)                | -                | 0.85 (0.00; 1.71)    | 0.33(0.33)          | 1.01             | Neolithic   |
| M13a     | 56                                | 48                                           | 40                                      | 15.72 (11.80; 19.64)               | 4.45(1.11)          | 0.06             | 15.43 (9.92; 20.94)                                                            | 1.96(0.7)           | 0.07             | 21.56 (17.24; 25.88) | 8.34(1.67)          | 0.05             | Paleolithic |
| M13a1    | 28                                | 20                                           | 17                                      | 6.82 (5.48; 8.16)                  | 1.93(0.38)          | 0.48             | 8.74 (6.38; 11.10)                                                             | 1.11(0.3)           | 0.44             | 8.76 (6.28; 11.24)   | 3.39(0.96)          | 0.13             | Paleolithic |
| M13a1b   | 24                                | 20                                           | 17                                      | 6.32 (5.02; 7.63)                  | 1.79(0.37)          | 0.54             | 8.50 (6.14; 10.86)                                                             | 1.08(0.3)           | 0.50             | 5.71 (4.65; 6.77)    | 2.21(0.41)          | 0.55             | Paleolithic |
| M13a1b1  | 3                                 | 3                                            | 0                                       | 1.17 (0.00; 2.33)                  | 0.33(0.33)          | 1.01             | 2.60 (0.00; 5.20)                                                              | 0.33(0.33)          | 1.01             | 1.73 (0.52; 2.95)    | 0.67(0.47)          | 1.01             | Neolithic   |
| M13a2    | 28                                | 28                                           | 23                                      | 13.46 (8.44; 18.48)                | 3.81(1.42)          | 0.07             | 14.56 (6.77; 22.36)                                                            | 1.85(0.99)          | 0.07             | 13.31 (9.02; 17.60)  | 5.15(1.66)          | 0.07             | Paleolithic |
| M13a2a   | 27                                | 27                                           | 22                                      | 6.78 (5.30; 8.27)                  | 1.92(0.42)          | 0.40             | 7.24 (5.20; 9.29)                                                              | 0.92(0.26)          | 0.50             | 8.38 (5.82; 10.93)   | 3.24(0.99)          | 0.12             | Paleolithic |



|               | Number of samples for calculation | Number of Tibetan samples (including Sherpa) | Number of Tibetan samples in this study | Coding Region (Soares et al. 2009) |                     |                  | Synonymous Positions (Soares et al. 2009) Complete Genome (Soares et al. 2009) |                     |                  |                      |                     |                  | Period†     |
|---------------|-----------------------------------|----------------------------------------------|-----------------------------------------|------------------------------------|---------------------|------------------|--------------------------------------------------------------------------------|---------------------|------------------|----------------------|---------------------|------------------|-------------|
|               |                                   |                                              |                                         | Age (lower; upper)                 | $\rho$ ( $\sigma$ ) | $\rho/n\sigma^2$ | Age (lower; upper)                                                             | $\rho$ ( $\sigma$ ) | $\rho/n\sigma^2$ | Age (lower; upper)   | $\rho$ ( $\sigma$ ) | $\rho/n\sigma^2$ |             |
| M13a2a1       | 23                                | 23                                           | 20                                      | 7.24 (5.58; 8.90)                  | 2.05(0.47)          | 0.40             | 7.87 (5.59; 10.15)                                                             | 1(0.29)             | 0.52             | 6.46 (5.17; 7.76)    | 2.5(0.5)            | 0.43             | Paleolithic |
| M13a2a1a      | 3                                 | 3                                            | 3                                       | 1.17 (0.00; 2.33)                  | 0.33(0.33)          | 1.01             | 2.60 (0.00; 5.20)                                                              | 0.33(0.33)          | 1.01             | 1.73 (0.52; 2.95)    | 0.67(0.47)          | 1.01             | Neolithic   |
| M13a2a1b      | 3                                 | 3                                            | 3                                       | 2.37 (0.71; 4.03)                  | 0.67(0.47)          | 1.01             | 2.60 (0.00; 5.20)                                                              | 0.33(0.33)          | 1.01             | 2.59 (1.09; 4.08)    | 1(0.58)             | 0.99             | Neolithic   |
| M13a2a1c      | 3                                 | 3                                            | 2                                       | 7.07 (3.74; 10.39)                 | 2(0.94)             | 0.75             | 0.00 (0.00; 0.00)                                                              | 0(0)                | -                | 6.02 (3.44; 8.61)    | 2.33(1)             | 0.78             | Paleolithic |
| M13a2a1d      | 3                                 | 3                                            | 3                                       | 5.90 (2.37; 9.43)                  | 1.67(1)             | 0.56             | 13.15 (5.27; 21.02)                                                            | 1.67(1)             | 0.56             | 4.32 (1.73; 6.90)    | 1.67(1)             | 0.56             | Neolithic   |
| M13a2a1e      | 4                                 | 4                                            | 3                                       | 2.83 (1.41; 4.24)                  | 0.8(0.4)            | 1.25             | 4.72 (1.97; 7.48)                                                              | 0.6(0.35)           | 1.22             | 3.10 (1.84; 4.37)    | 1.2(0.49)           | 1.25             | Neolithic   |
| M62           | 42                                | 38                                           | 23                                      | 13.71 (10.70; 16.71)               | 3.88(0.85)          | 0.13             | 20.07 (14.72; 25.43)                                                           | 2.55(0.68)          | 0.13             | 23.45 (19.31; 27.58) | 9.07(1.6)           | 0.08             | Paleolithic |
| M62a          | 9                                 | 7                                            | 6                                       | 5.51 (3.60; 7.42)                  | 1.56(0.54)          | 0.59             | 5.27 (2.52; 8.03)                                                              | 0.67(0.35)          | 0.61             | 12.93 (9.38; 16.47)  | 5(1.37)             | 0.30             | Neolithic   |
| M62a1         | 7                                 | 7                                            | 6                                       | 2.51 (0.99; 4.03)                  | 0.71(0.43)          | 0.55             | 0.00 (0.00; 0.00)                                                              | 0(0)                | -                | 10.70 (7.26; 14.14)  | 4.14(1.33)          | 0.33             | Neolithic   |
| M62a1a        | 6                                 | 6                                            | 5                                       | 2.93 (1.17; 4.70)                  | 0.83(0.5)           | 0.55             | 0.00 (0.00; 0.00)                                                              | 0(0)                | -                | 9.49 (6.44; 12.54)   | 3.67(1.18)          | 0.44             | Neolithic   |
| M62a1a1       | 4                                 | 4                                            | 3                                       | 4.42 (1.77; 7.07)                  | 1.25(0.75)          | 0.56             | 0.00 (0.00; 0.00)                                                              | 0(0)                | -                | 6.46 (3.72; 9.20)    | 2.5(1.06)           | 0.56             | Neolithic   |
| M62b          | 33                                | 31                                           | 17                                      | 14.03 (10.49; 17.56)               | 3.97(1)             | 0.12             | 19.84 (13.78; 25.90)                                                           | 2.52(0.77)          | 0.13             | 20.91 (16.65; 25.18) | 8.09(1.65)          | 0.09             | Paleolithic |
| M62b1         | 23                                | 21                                           | 13                                      | 14.45 (9.75; 19.15)                | 4.09(1.33)          | 0.10             | 18.11 (10.55; 25.66)                                                           | 2.3(0.96)           | 0.11             | 16.62 (12.74; 20.50) | 6.43(1.5)           | 0.12             | Paleolithic |
| M62b1a        | 15                                | 13                                           | 4                                       | 7.77 (4.49; 11.06)                 | 2.2(0.93)           | 0.17             | 8.42 (6.22; 10.63)                                                             | 1.07(0.28)          | 0.91             | 12.74 (9.18; 16.31)  | 4.93(1.38)          | 0.17             | Paleolithic |
| M62b1a1       | 13                                | 12                                           | 4                                       | 4.35 (3.18; 5.51)                  | 1.23(0.33)          | 0.87             | 8.50 (6.06; 10.94)                                                             | 1.08(0.31)          | 0.86             | 7.37 (5.69; 9.05)    | 2.85(0.65)          | 0.52             | Paleolithic |
| M62b1a1a      | 3                                 | 3                                            | 1                                       | 9.43 (5.72; 13.14)                 | 2.67(1.05)          | 0.81             | 15.74 (8.34; 23.14)                                                            | 2(0.94)             | 0.75             | 7.76 (4.89; 10.62)   | 3(1.11)             | 0.81             | Paleolithic |
| M62b1a1b      | 8                                 | 7                                            | 3                                       | 2.83 (1.84; 3.82)                  | 0.8(0.28)           | 1.28             | 6.30 (4.09; 8.50)                                                              | 0.8(0.28)           | 1.28             | 6.46 (4.63; 8.30)    | 2.5(0.71)           | 0.62             | Paleolithic |
| M62b1a1b1     | 3                                 | 3                                            | 0                                       | 2.83 (1.41; 4.24)                  | 0.8(0.4)            | 1.67             | 6.30 (3.15; 9.45)                                                              | 0.8(0.4)            | 1.67             | 6.20 (4.14; 8.27)    | 2.4(0.8)            | 1.25             | Paleolithic |
| M62b1b        | 6                                 | 6                                            | 6                                       | 4.13 (1.45; 6.82)                  | 1.17(0.76)          | 0.34             | 6.53 (1.10; 11.97)                                                             | 0.83(0.69)          | 0.29             | 6.90 (4.03; 9.77)    | 2.67(1.11)          | 0.36             | Paleolithic |
| M62b1b1       | 4                                 | 4                                            | 4                                       | 0.88 (0.00; 1.77)                  | 0.25(0.25)          | 1.00             | 1.97 (0.00; 3.94)                                                              | 0.25(0.25)          | 1.00             | 5.17 (2.27; 8.07)    | 2(1.12)             | 0.40             | Neolithic   |
| M62b2         | 8                                 | 8                                            | 5                                       | 7.49 (4.80; 10.18)                 | 2.12(0.76)          | 0.46             | 9.84 (4.49; 15.19)                                                             | 1.25(0.68)          | 0.34             | 12.93 (9.85; 16.00)  | 5(1.19)             | 0.44             | Paleolithic |
| M62b2a        | 5                                 | 5                                            | 3                                       | 7.07 (4.84; 9.29)                  | 2(0.63)             | 1.01             | 7.87 (4.33; 11.41)                                                             | 1(0.45)             | 0.99             | 10.34 (7.60; 13.08)  | 4(1.06)             | 0.71             | Paleolithic |
| M9a1a1c1b1a‡  | 154                               | 138                                          | 111                                     | 4.24 (2.40; 6.08)                  | 1.20 (0.52)         | 0.03             | 4.96 (4.45; 5.48)                                                              | 1.92 (0.20)         | 0.31             | 5.11 (4.36; 5.86)    | 0.64 (0.00)         | -                | Neolithic   |
| M9a1a1c1b1a1  | 5                                 | 4                                            | 1                                       | 4.24 (2.26; 6.22)                  | 1.20(0.56)          | 0.77             | 4.72 (1.97; 7.48)                                                              | 0.60(0.35)          | 0.98             | 6.20 (4.14; 8.27)    | 2.40(0.80)          | 0.75             | Neolithic   |
| M9a1a1c1b1a10 | 3                                 | 0                                            | 0                                       | 0.00 (0.00; 0.00)                  | 0.00(0.00)          | -                | 0.00 (0.00; 0.00)                                                              | 0.00(0.00)          | -                | 1.73 (0.00; 3.46)    | 0.67(0.67)          | 0.50             | Neolithic   |
| M9a1a1c1b1a11 | 4                                 | 4                                            | 3                                       | 3.53 (1.77; 5.30)                  | 1.00(0.50)          | 1.00             | 1.97 (0.00; 3.94)                                                              | 0.25(0.25)          | 1.00             | 3.23 (1.78; 4.68)    | 1.25(0.56)          | 1.00             | Neolithic   |
| M9a1a1c1b1a12 | 5                                 | 5                                            | 4                                       | 3.53 (1.66; 5.41)                  | 1.00(0.53)          | 0.71             | 6.30 (2.44; 10.15)                                                             | 0.80(0.49)          | 0.67             | 3.10 (1.63; 4.58)    | 1.20(0.57)          | 0.74             | Neolithic   |
| M9a1a1c1b1a13 | 7                                 | 7                                            | 6                                       | 4.52 (2.86; 6.18)                  | 1.28(0.47)          | 0.83             | 5.98 (3.23; 8.74)                                                              | 0.76(0.35)          | 0.89             | 7.01 (4.96; 9.05)    | 2.71(0.79)          | 0.62             | Neolithic   |
| M9a1a1c1b1a14 | 3                                 | 3                                            | 2                                       | 1.17 (0.00; 2.33)                  | 0.33(0.33)          | 1.01             | 0.00 (0.00; 0.00)                                                              | 0.00(0.00)          | -                | 3.44 (1.32; 5.56)    | 1.33(0.82)          | 0.66             | Neolithic   |
| M9a1a1c1b1a2a | 8                                 | 9                                            | 8                                       | 2.65 (1.55; 3.74)                  | 0.75(0.31)          | 0.98             | 3.94 (1.97; 5.90)                                                              | 0.50(0.25)          | 1.00             | 3.23 (2.02; 4.45)    | 1.25(0.47)          | 0.71             | Neolithic   |
| M9a1a1c1b1a3  | 3                                 | 1                                            | 2                                       | 1.17 (0.00; 2.33)                  | 0.33(0.33)          | 1.01             | 2.60 (0.00; 5.20)                                                              | 0.33(0.33)          | 1.01             | 0.85 (0.00; 1.71)    | 0.33(0.33)          | 1.01             | Neolithic   |

|              | Number of samples for calculation | Number of Tibetan samples (including Sherpa) | Number of Tibetan samples in this study | Coding Region (Soares et al. 2009) |                     |                  | Synonymous Positions (Soares et al. 2009 Complete Genome (Soares et al. 2009 |                     |                  |                     |                     |                  | Period†     |
|--------------|-----------------------------------|----------------------------------------------|-----------------------------------------|------------------------------------|---------------------|------------------|------------------------------------------------------------------------------|---------------------|------------------|---------------------|---------------------|------------------|-------------|
|              |                                   |                                              |                                         | Age (lower; upper)                 | $\rho$ ( $\sigma$ ) | $\rho/n\sigma^2$ | Age (lower; upper)                                                           | $\rho$ ( $\sigma$ ) | $\rho/n\sigma^2$ | Age (lower; upper)  | $\rho$ ( $\sigma$ ) | $\rho/n\sigma^2$ |             |
| M9a1a1c1b1a4 | 3                                 | 0                                            | 3                                       | 0.00 (0.00; 0.00)                  | 0.00(0.00)          | -                | 0.00 (0.00; 0.00)                                                            | 0.00(0.00)          | -                | 0.00 (0.00; 0.00)   | 0.00(0.00)          | -                | Neolithic   |
| M9a1a1c1b1a5 | 3                                 | 1                                            | 2                                       | 3.53 (0.88; 6.18)                  | 1.00(0.75)          | 0.59             | 5.27 (0.00; 10.55)                                                           | 0.67(0.67)          | 0.50             | 4.32 (2.04; 6.59)   | 1.67(0.88)          | 0.72             | Neolithic   |
| M9a1a1c1b1a6 | 3                                 | 3                                            | 3                                       | 4.70 (1.38; 8.02)                  | 1.33(0.94)          | 0.50             | 5.27 (0.00; 10.55)                                                           | 0.67(0.67)          | 0.50             | 3.44 (1.01; 5.87)   | 1.33(0.94)          | 0.50             | Neolithic   |
| M9a1a1c1b1a7 | 3                                 | 3                                            | 3                                       | 2.37 (0.71; 4.03)                  | 0.67(0.47)          | 1.01             | 2.60 (0.00; 5.20)                                                            | 0.33(0.33)          | 1.01             | 3.44 (1.71; 5.17)   | 1.33(0.67)          | 0.99             | Neolithic   |
| M9a1a1c1b1a8 | 8                                 | 7                                            | 4                                       | 4.84 (3.39; 6.29)                  | 1.37(0.41)          | 1.02             | 5.90 (3.46; 8.34)                                                            | 0.75(0.31)          | 0.98             | 4.19 (3.02; 5.35)   | 1.62(0.45)          | 1.00             | Neolithic   |
| M9a1a1c1b1a9 | 4                                 | 2                                            | 0                                       | 0.00 (0.00; 0.00)                  | 0.00(0.00)          | -                | 0.00 (0.00; 0.00)                                                            | 0.00(0.00)          | -                | 0.65 (0.00; 1.29)   | 0.25(0.25)          | 1.00             | Neolithic   |
| M9a1a2       | 18                                | 16                                           | 5                                       | 3.53 (1.91; 5.16)                  | 1(0.46)             | 0.26             | 5.27 (2.36; 8.19)                                                            | 0.67(0.37)          | 0.27             | 9.05 (5.84; 12.25)  | 3.5(1.24)           | 0.13             | Neolithic   |
| M9a1a2a      | 17                                | 14                                           | 5                                       | 3.32 (1.59; 5.05)                  | 0.94(0.49)          | 0.23             | 5.12 (2.05; 8.19)                                                            | 0.65(0.39)          | 0.25             | 6.70 (4.52; 8.87)   | 2.59(0.84)          | 0.22             | Neolithic   |
| M9a1a2a1     | 10                                | 8                                            | 5                                       | 3.53 (1.24; 5.83)                  | 1(0.65)             | 0.24             | 7.87 (2.76; 12.99)                                                           | 1(0.65)             | 0.24             | 6.20 (3.98; 8.43)   | 2.4(0.86)           | 0.32             | Neolithic   |
| M9a1a2a1a    | 6                                 | 4                                            | 3                                       | 2.37 (0.92; 3.82)                  | 0.67(0.41)          | 0.66             | 5.27 (2.05; 8.50)                                                            | 0.67(0.41)          | 0.66             | 3.44 (2.07; 4.81)   | 1.33(0.53)          | 0.79             | Neolithic   |
| M9a1a2a1b    | 4                                 | 4                                            | 2                                       | 0.00 (0.00; 0.00)                  | 0(0)                | -                | 0.00 (0.00; 0.00)                                                            | 0(0)                | -                | 3.88 (1.63; 6.13)   | 1.5(0.87)           | 0.50             | Neolithic   |
| M9a1a2a1b1   | 3                                 | 3                                            | 1                                       | 0.00 (0.00; 0.00)                  | 0(0)                | -                | 0.00 (0.00; 0.00)                                                            | 0(0)                | -                | 1.73 (0.52; 2.95)   | 0.67(0.47)          | 1.01             | Neolithic   |
| M9a1a2a2     | 5                                 | 5                                            | 0                                       | 0.00 (0.00; 0.00)                  | 0(0)                | -                | 0.00 (0.00; 0.00)                                                            | 0(0)                | -                | 1.55 (0.39; 2.71)   | 0.6(0.45)           | 0.59             | Neolithic   |
| M9a1b1c      | 18                                | 17                                           | 14                                      | 3.14 (2.26; 4.03)                  | 0.89(0.25)          | 0.79             | 3.94 (2.52; 5.35)                                                            | 0.50(0.18)          | 0.86             | 5.45 (4.37; 6.54)   | 2.11(0.42)          | 0.66             | Neolithic   |
| M9a1b1e      | 16                                | 8                                            | 7                                       | 3.74 (2.79; 4.70)                  | 1.06(0.27)          | 0.91             | 5.43 (3.62; 7.24)                                                            | 0.69(0.23)          | 0.82             | 5.51 (4.16; 6.85)   | 2.13(0.52)          | 0.49             | Neolithic   |
| M9a1b1e1     | 5                                 | 4                                            | 4                                       | 4.24 (2.23; 6.25)                  | 1.20(0.57)          | 0.74             | 9.45 (5.04; 13.85)                                                           | 1.20(0.56)          | 0.77             | 3.10 (1.63; 4.58)   | 1.20(0.57)          | 0.74             | Neolithic   |
| M9a1b1d      | 7                                 | 6                                            | 6                                       | 2.51 (1.17; 3.85)                  | 0.71(0.38)          | 0.70             | 2.28 (0.71; 3.86)                                                            | 0.29(0.2)           | 1.04             | 2.22 (1.19; 3.26)   | 0.86(0.4)           | 0.77             | Neolithic   |
| Z3a3         | 4                                 | 4                                            | 4                                       | 9.72 (5.86; 13.57)                 | 2.75(1.09)          | 0.58             | 9.84 (4.64; 15.04)                                                           | 1.25(0.66)          | 0.72             | 13.57 (9.64; 17.50) | 5.25(1.52)          | 0.57             | Paleolithic |
| Z7a          | 3                                 | 3                                            | 2                                       | 4.70 (1.80; 7.60)                  | 1.33(0.82)          | 0.66             | 2.60 (0.00; 5.20)                                                            | 0.33(0.33)          | 1.01             | 6.90 (4.19; 9.62)   | 2.67(1.05)          | 0.81             | Neolithic   |

Note: †The period of a haplogroup was determined if no less than two estimations were within this period.

‡ Haplogroups with ages from 5.2-4.0 kya

**Table S9. Estimated proportions of different components in Tibetans since the Neolithic period.**

| Time (ka) | All Tibetans                          | A11a1a and M9a1a1c1b1a                |                             | Paleolithic lineages                  |                             | Other Neolithic lineages           |                             |
|-----------|---------------------------------------|---------------------------------------|-----------------------------|---------------------------------------|-----------------------------|------------------------------------|-----------------------------|
|           | Effective population size<br>(95% CI) | Effective population size<br>(95% CI) | Proportions (%)<br>(95% CI) | Effective population size<br>(95% CI) | Proportions (%)<br>(95% CI) | Effective population size (95% CI) | Proportions (%)<br>(95% CI) |
| 0.00      | 3452.10 (857.07-23076.84)             | 658.77 (127.35-4022.63)               | 19.08 (14.86-17.43)         | 1100.54 (216.81-9568.68)              | 31.88 (25.30-41.46)         | 686.09 (137.87-4288.62)            | 19.87 (16.09-18.58)         |
| 0.30      | 3279.65 (1174.51-19330.44)            | 723.57 (329.15-2411.54)               | 22.06 (28.02-12.48)         | 992.10 (381.92-5949.59)               | 30.25 (32.52-30.78)         | 675.60 (266.55-3165.78)            | 20.60 (22.69-16.38)         |
| 0.60      | 3060.01 (1242.33-15982.69)            | 778.15 (380.12-1917.62)               | 25.43 (30.60-12.00)         | 891.04 (374.49-3955.74)               | 29.12 (30.14-24.75)         | 668.19 (286.55-2450.72)            | 21.84 (23.07-15.33)         |
| 0.91      | 2872.22 (1206.36-13126.00)            | 821.77 (406.78-1810.85)               | 28.61 (33.72-13.80)         | 803.31 (320.08-2802.71)               | 27.97 (26.53-21.35)         | 651.39 (276.84-1966.34)            | 22.68 (22.95-14.98)         |
| 1.21      | 2672.07 (1154.17-10992.12)            | 854.82 (420.56-1833.28)               | 31.99 (36.44-16.68)         | 727.00 (277.84-2166.31)               | 27.21 (24.07-19.71)         | 625.46 (253.73-1756.94)            | 23.41 (21.98-15.98)         |
| 1.51      | 2484.53 (1046.98-9269.08)             | 880.98 (425.55-1865.96)               | 35.46 (40.65-20.13)         | 662.94 (237.50-1771.12)               | 26.68 (22.68-19.11)         | 592.89 (228.66-1567.90)            | 23.86 (21.84-16.92)         |
| 1.81      | 2290.48 (914.92-7719.55)              | 890.54 (409.22-1955.46)               | 38.88 (44.73-25.33)         | 603.27 (203.98-1567.74)               | 26.34 (22.29-20.31)         | 548.76 (189.31-1450.27)            | 23.96 (20.69-18.79)         |
| 2.12      | 2116.08 (781.28-6569.08)              | 887.08 (389.47-1987.02)               | 41.92 (49.85-30.25)         | 560.49 (178.82-1426.75)               | 26.49 (22.89-21.72)         | 496.59 (152.66-1357.36)            | 23.47 (19.54-20.66)         |
| 2.42      | 1950.34 (680.52-5639.98)              | 866.47 (349.50-2047.05)               | 44.43 (51.36-36.30)         | 528.37 (176.45-1330.37)               | 27.09 (25.93-23.59)         | 432.26 (106.99-1275.81)            | 22.16 (15.72-22.62)         |
| 2.72      | 1793.75 (607.32-4926.16)              | 835.07 (318.49-2102.90)               | 46.55 (52.44-42.69)         | 504.52 (176.33-1276.01)               | 28.13 (29.03-25.90)         | 363.76 (70.06-1216.14)             | 20.28 (11.54-24.69)         |
| 3.02      | 1641.83 (524.15-4461.01)              | 785.56 (269.19-2054.81)               | 47.85 (51.36-46.06)         | 485.98 (181.71-1205.97)               | 29.60 (34.67-27.03)         | 284.48 (40.38-1110.33)             | 17.33 (7.70-24.89)          |
| 3.32      | 1478.85 (441.76-4098.12)              | 721.85 (223.86-2039.35)               | 48.81 (50.68-49.76)         | 470.81 (187.54-1188.45)               | 31.84 (42.45-29.00)         | 202.90 (25.90-959.03)              | 13.72 (5.86-23.40)          |
| 3.63      | 1336.03 (365.04-3880.76)              | 636.34 (167.32-1863.34)               | 47.63 (45.84-48.01)         | 457.64 (181.59-1171.88)               | 34.25 (49.74-30.20)         | 132.48 (20.04-805.88)              | 9.92 (5.49-20.77)           |
| 3.93      | 1184.79 (322.60-3543.61)              | 536.85 (102.82-1754.30)               | 45.31 (31.87-49.51)         | 443.31 (173.02-1157.89)               | 37.42 (53.63-32.68)         | 82.70 (17.29-634.51)               | 6.98 (5.36-17.91)           |
| 4.23      | 1038.46 (285.20-3252.44)              | 416.05 (48.33-1585.25)                | 40.06 (16.95-48.74)         | 429.22 (165.91-1142.73)               | 41.33 (58.17-35.13)         | 60.85 (16.39-469.09)               | 5.86 (5.75-14.42)           |
| 4.53      | 902.31 (249.56-3019.70)               | 296.44 (19.13-1390.93)                | 32.85 (7.66-46.06)          | 415.41 (157.24-1125.01)               | 46.04 (63.01-37.26)         | 52.92 (16.33-342.76)               | 5.87 (6.54-11.35)           |
| 4.84      | 779.92 (209.33-2736.11)               | 182.78 (11.17-1123.84)                | 23.44 (5.34-41.07)          | 399.16 (149.63-1104.61)               | 51.18 (71.48-40.37)         | 50.37 (16.10-239.71)               | 6.46 (7.69-8.76)            |
| 5.14      | 672.17 (183.12-2401.86)               | 96.70 (7.96-858.28)                   | 14.39 (4.35-35.73)          | 381.06 (140.37-1089.33)               | 56.69 (76.65-45.35)         | 50.40 (18.28-165.03)               | 7.50 (9.98-6.87)            |
| 5.44      | 591.40 (167.59-2127.73)               | 47.15 (6.21-634.47)                   | 7.97 (3.71-29.82)           | 363.35 (132.85-1061.06)               | 61.44 (79.27-49.87)         | 51.60 (19.03-133.38)               | 8.72 (11.36-6.27)           |
| 5.74      | 530.01 (150.92-1864.11)               | 26.14 (5.41-456.49)                   | 4.93 (3.59-24.49)           | 342.01 (121.14-1015.45)               | 64.53 (80.26-54.47)         | 53.98 (20.71-122.80)               | 10.19 (13.72-6.59)          |
| 6.04      | 496.95 (150.84-1622.32)               | 18.64 (4.71-291.55)                   | 3.75 (3.12-17.97)           | 323.10 (115.87-985.07)                | 65.02 (76.82-60.72)         | 56.76 (22.87-121.99)               | 11.42 (15.16-7.52)          |
| 6.35      | 471.10 (154.82-1409.94)               | 15.22 (4.49-173.84)                   | 3.23 (2.90-12.33)           | 305.27 (105.11-917.79)                | 64.80 (67.89-65.09)         | 60.09 (25.56-124.77)               | 12.75 (16.51-8.85)          |

**Table S10. Complete mtDNA variants and haplogroup allocations of 682 samples in this study.**

| Sample ID | Population |          | Haplogroup   | Variants                                                                                                                                                                                                                                                                                     |
|-----------|------------|----------|--------------|----------------------------------------------------------------------------------------------------------------------------------------------------------------------------------------------------------------------------------------------------------------------------------------------|
|           | code       | Location |              |                                                                                                                                                                                                                                                                                              |
| K38137    | Tib_1      | Ngari    | D4b2b        | 73, 194, 263, 310, 489, 523-524d, 750, 1382C, 1438, 2706, 3010, 3106N, 3397, 4113, 4769, 4883, 5178A, 7028, 8020, 8414, 8701, 8860, 8964, 9296, 9540, 9824A, 10398, 10400, 10873, 11719, 12705, 14053, 14668, 14766, 14783, 15043, 15301, 15326, 16223, 16291, 16356, 16362, 16519           |
| K38101    | Tib_1      | Ngari    | A15a         | 73, 152, 204, 207, 235, 309+C, 315+C, 523-524d, 663, 750, 1438, 1736, 2706, 3106N, 4248, 4769, 4824, 7028, 8459, 8794, 8860, 11084, 11719, 12705, 14067, 14766, 15326, 16223, 16274, 16290, 16319, 16362                                                                                     |
| K38414    | Tib_1      | Ngari    | D4q          | 73, 195, 200, 263, 309+C, 315+C, 489, 750, 1438, 2706, 3010, 3106N, 4769, 4883, 5178A, 7028, 8414, 8701, 8860, 9540, 10398, 10400, 10873, 11719, 12705, 14311, 14668, 14766, 14783, 15043, 15301, 15326, 16223, 16256, 16311, 16362, 16519                                                   |
| K38013    | Tib_1      | Ngari    | M9a1a1c1b1a  | 73, 263, 309+CC, 315+C, 489, 711, 750, 1041, 1438, 2706, 3106N, 3394, 4491, 4769, 5899+XC, 7028, 7142, 7697, 8701, 8860, 9242, 9540, 10398, 10400, 10873, 11719, 12705, 14308, 14417, 14766, 14783, 15043, 15301, 15326, 16223, 16316, 16362                                                 |
| K38066    | Tib_1      | Ngari    | M9a1a1c1b1a  | 73, 263, 309+C, 315+C, 489, 711, 750, 1041, 1438, 2706, 3106N, 3394, 4491, 4769, 5899+XC, 7028, 7142, 7697, 7870, 8701, 8860, 9242, 9540, 10398, 10400, 10873, 11719, 12705, 14308, 14417, 14766, 14783, 15043, 15301, 15326, 16223, 16234, 16244, 16316, 16362                              |
| K38842    | Tib_1      | Ngari    | F1b1c        | 73, 152, 249d, 263, 309+CC, 315+C, 523-524d, 750, 1438, 2706, 3106N, 3345, 3970, 4732, 4769, 5147, 5508, 6392, 6962, 7028, 8860, 10235, 10310, 10609, 10976, 11719, 11732, 12406, 12882, 13095, 13928C, 14476, 14766, 15119, 15326, 16134, 16183C, 16189, 16232A, 16249, 16304, 16519        |
| K37576    | Tib_1      | Ngari    | M7b1a1b      | 73, 150, 152, 199, 204, 207, 263, 271, 309+CC, 315+C, 489, 750, 1438, 2706, 3106N, 3483, 4048, 4071, 4164, 4769, 5351, 5460, 6455, 6680, 7028, 7684, 7853, 8701, 8860, 9540, 9824, 10398, 10400, 10873, 11719, 12405, 12705, 12811, 13105, 14766, 14783, 15043, 15301, 15326, 16223, 16297   |
| K38581    | Tib_1      | Ngari    | G2a1i        | 73, 263, 310, 489, 709, 750, 1438, 2706, 3106N, 4769, 4833, 5108, 5601, 6266, 7028, 7600, 8701, 8860, 9377, 9540, 9575, 10398, 10400, 10873, 11719, 12705, 13563, 14200, 14569, 14766, 14783, 15043, 15301, 15326, 16129, 16223, 16278, 16362                                                |
| K38844    | Tib_1      | Ngari    | M9a1a1c1b1a  | 73, 263, 309+C, 315+C, 489, 711, 750, 1041, 1438, 2706, 3106N, 3394, 4491, 4769, 5899+XC, 7028, 7142, 7697, 8701, 8860, 9242, 9540, 10398, 10400, 10873, 11719, 12705, 14308, 14417, 14766, 14783, 15043, 15301, 15326, 16114G, 16223, 16234, 16316, 16362                                   |
| K38724    | Tib_1      | Ngari    | M9a1a1c1b1a8 | 73, 263, 309+CC, 315+C, 489, 711, 750, 1041, 1438, 2706, 3106N, 3394, 4491, 4769, 7028, 7142, 7697, 8701, 8860, 9242, 9540, 10398, 10400, 10873, 11719, 12705, 14308, 14417, 14766, 14783, 15043, 15301, 15326, 16223, 16234, 16316, 16362                                                   |
| K38671    | Tib_1      | Ngari    | M9a1a1c1b1a  | 73, 263, 309+CC, 315+C, 489, 711, 750, 1041, 1438, 2706, 3106N, 3394, 4491, 4769, 5899+XC, 7028, 7142, 7697, 8701, 8860, 9242, 9540, 10398, 10400, 10873, 11719, 12705, 14185, 14308, 14417, 14766, 14783, 15043, 15301, 15326, 16223, 16234, 16316, 16362                                   |
| K38418    | Tib_1      | Ngari    | D4j3b        | 73, 263, 309+C, 315+C, 338, 489, 750, 1438, 2706, 3010, 3106N, 4769, 4883, 5178A, 7028, 8414, 8701, 8860, 9540, 10398, 10400, 10873, 11696, 11719, 12164, 12705, 14668, 14766, 14783, 15043, 15301, 15326, 15519, 16184, 16223, 16260, 16311, 16362, 16519                                   |
| K38754    | Tib_1      | Ngari    | U7a3b        | 73, 151, 152, 263, 310, 523-524d, 750, 980, 1438, 1453, 1811, 2706, 3106N, 3741, 3834, 4769, 5360, 6452, 7028, 8137, 8684, 8860, 10142, 10899, 11467, 11719, 12308, 12372, 12618, 13135, 13500, 14569, 14766, 15326, 16140, 16207, 16309, 16318T, 16362, 16519                               |
| K38733    | Tib_1      | Ngari    | F1d          | 73, 146, 249d, 263, 309+CC, 315+C, 523-524d, 750, 1438, 1734, 2706, 3106N, 3970, 4769, 5460, 5628, 5794, 6392, 6962, 7028, 7738, 8410, 8860, 10310, 10609, 11092, 11719, 12406, 12882, 13928C, 14766, 15326, 15402, 16304, 16519                                                             |
| K38506    | Tib_1      | Ngari    | A11a1a1      | 73, 152, 235, 263, 309+CC, 315+C, 460, 523-524d, 663, 750, 1005, 1438, 1736, 2706, 3106N, 4248, 4769, 4824, 5162, 5899+XC, 6755, 7028, 8794, 8843, 8860, 9650, 11719, 12705, 14766, 15326, 15930, 16212, 16223, 16290, 16293C, 16319, 16519                                                  |
| K38501    | Tib_1      | Ngari    | Z3a1a        | 73, 146, 152, 207, 249d, 263, 309+C, 315+C, 489, 750, 1438, 2706, 3106N, 4715, 4769, 5806, 6752, 7028, 7196A, 8584, 8701, 8860, 8931, 9090, 9540, 9713, 10208, 10398, 10400, 10873, 11075, 11719, 12705, 13620, 14766, 14783, 15043, 15301, 15487T, 15784, 15928, 16185, 16223, 16260, 16298 |
| K38180    | Tib_2      | Chamdo   | B4d4         | 73, 188, 263, 309+CC, 315+C, 750, 827, 1438, 2706, 2755, 3106N, 4769, 5372, 6324C, 7028, 8281-8289d, 8860, 11719, 11914, 13942, 14766, 15326, 15535, 15930, 16183C, 16189, 16217, 16234, 16519                                                                                               |
| K38117    | Tib_2      | Chamdo   | G2a1h1a      | 73, 146, 263, 283, 309+C, 315+C, 489, 709, 750, 1438, 2706, 3106N, 3203, 3316, 4158, 4769, 4833, 5108, 5601, 7028, 7600, 8701, 8860, 9377, 9540, 9575, 10398, 10400, 10873, 11719, 12705, 13194, 13563, 14200, 14569, 14766, 14783, 15043, 15301, 15326, 16092, 16215, 16227, 16278, 16362   |
| K38845    | Tib_2      | Chamdo   | A            | 73, 152, 182, 235, 263, 309+C, 315+C, 663, 750, 1438, 1736, 2706, 3106N, 4248, 4769, 4824, 7028, 8794, 8860, 8908, 9038, 11719, 12705, 13488, 14766, 15326, 16223, 16248, 16290, 16319, 16362                                                                                                |

|        |       |        |               |                                                                                                                                                                                                                                                                                                                                                            |
|--------|-------|--------|---------------|------------------------------------------------------------------------------------------------------------------------------------------------------------------------------------------------------------------------------------------------------------------------------------------------------------------------------------------------------------|
| K38194 | Tib_2 | Chamdo | M9a1b1d       | 73, 150, 152, 153, 263, 310, 489, 750, 1041, 1438, 2706, 3106N, 3394, 4491, 4769, 7028, 8701, 8860, 9540, 10398, 10400, 10604, 10873, 11719, 12362, 12705, 14308, 14766, 14783, 15043, 15119, 15301, 15326, 15671, 16158, 16223, 16234, 16362, 16519                                                                                                       |
| K3162  | Tib_2 | Chamdo | M9a1a1c1b1a11 | 73, 263, 309+C, 315+C, 489, 711, 750, 1041, 1438, 2706, 3106N, 3394, 4491, 4769, 5492, 5899+XC, 7028, 7142, 7697, 8701, 8860, 9242, 9540, 10398, 10400, 10873, 11719, 12705, 13602, 14308, 14417, 14766, 14783, 15043, 15301, 15326, 16223, 16234, 16316, 16362, 16519                                                                                     |
| K3163  | Tib_2 | Chamdo | M8a1          | 73, 263, 310, 489, 750, 1438, 2706, 3106N, 4314d, 4715, 4769, 6179, 7028, 7196A, 8453, 8584, 8684, 8701, 8860, 9540, 10398, 10400, 10873, 11719, 12705, 14470, 14766, 14783, 15043, 15047, 15301, 15326, 15487T, 15697, 15787, 16223, 16298, 16319                                                                                                         |
| K38220 | Tib_2 | Chamdo | A17a2         | 73, 152, 235, 263, 309+C, 315+C, 523-524d, 538, 663, 750, 1438, 1736, 2218, 2706, 3106N, 4113, 4248, 4769, 4824, 5514, 7028, 8794, 8860, 9126, 11719, 12705, 14766, 15217, 15326, 16086, 16223, 16290, 16319, 16362                                                                                                                                        |
| K38635 | Tib_2 | Chamdo | B4d1'2'3      | 73, 263, 309+C, 315+C, 750, 827, 1438, 2625, 2706, 3106N, 4769, 7028, 8281-8289d, 8860, 11719, 11914, 13942, 14766, 15326, 15535, 15930, 16183C, 16189, 16217, 16234, 16519                                                                                                                                                                                |
| K38176 | Tib_2 | Chamdo | B5b           | 73, 103, 263, 309+CC, 315+C, 523-524d, 709, 750, 960+XC, 1438, 1598, 2706, 3106N, 4418, 4769, 4947, 6101, 7028, 8281-8289d, 8584, 8784, 8829, 8860, 9950, 10398, 11719, 12361, 14384, 14766, 15077, 15223, 15326, 15508, 15662, 15791C, 15851, 15927, 16140, 16182C, 16183C, 16189, 16243                                                                  |
| K38679 | Tib_2 | Chamdo | D4b2b10       | 41, 73, 194, 207, 263, 310, 489, 523-524d, 750, 1382C, 1438, 2706, 3010, 3106N, 4769, 4883, 5178A, 7028, 8020, 8414, 8701, 8860, 8964, 9296, 9540, 9824A, 10398, 10400, 10873, 11719, 12705, 14668, 14766, 14783, 15043, 15301, 15326, 16223, 16362, 16519                                                                                                 |
| K38130 | Tib_2 | Chamdo | D4b2b8        | 73, 183, 194, 263, 310, 390, 489, 523-524d, 750, 1382C, 1438, 2706, 3010, 3106N, 3398, 4769, 4883, 5178A, 7028, 8020, 8414, 8701, 8860, 8964, 9296, 9540, 9824A, 10398, 10400, 10873, 11719, 12705, 13500, 14668, 14766, 14783, 15043, 15301, 15326, 15613, 16223, 16362, 16519                                                                            |
| K38195 | Tib_2 | Chamdo | D4j3b         | 73, 263, 309+CC, 315+C, 338, 489, 750, 1438, 2706, 3010, 3106N, 4769, 4883, 5178A, 7028, 8414, 8701, 8860, 9540, 10398, 10400, 10873, 11696, 11719, 12705, 14668, 14766, 14783, 15043, 15301, 15326, 16184, 16223, 16311, 16362                                                                                                                            |
| K38065 | Tib_2 | Chamdo | F1b1c         | 73, 152, 249d, 263, 309+CC, 315+C, 523-524d, 750, 1438, 2706, 3106N, 3970, 4732, 4769, 5147, 5508, 6392, 6962, 7028, 8860, 8955, 9932, 10235, 10310, 10609, 10976, 11719, 12406, 12882, 13928C, 14476, 14766, 15119, 15326, 16182C, 16183C, 16189, 16209, 16232A, 16249, 16304, 16519                                                                      |
| K38419 | Tib_2 | Chamdo | F1g           | 73, 249d, 263, 310, 523-524d, 750, 1438, 2389, 2706, 3106N, 3398, 3970, 4769, 6392, 6962, 7028, 8837, 8860, 10310, 10609, 11719, 12406, 12882, 13928C, 14766, 15326, 16183C, 16189, 16304, 16519                                                                                                                                                           |
| K38576 | Tib_2 | Chamdo | G1a           | 73, 263, 310, 489, 709, 750, 1438, 2706, 3106N, 4769, 4833, 5108, 6719, 7028, 7867, 8200, 8289+CCCCCTCTA, 8701, 8860, 9540, 10398, 10400, 10873, 11719, 12070, 12705, 14569, 14766, 14783, 15043, 15301, 15323, 15326, 15497, 16223, 16311, 16362, 16519                                                                                                   |
| K38155 | Tib_2 | Chamdo | G2a1h1a       | 73, 146, 263, 283, 309+C, 315+C, 489, 709, 750, 1438, 2706, 3106N, 4158, 4769, 4833, 5108, 5601, 7028, 7600, 8701, 8860, 9377, 9540, 9575, 10398, 10400, 10873, 11084, 11719, 12705, 13194, 13563, 14200, 14569, 14766, 14783, 15043, 15301, 15326, 16227, 16278, 16362                                                                                    |
| K38170 | Tib_2 | Chamdo | G3a1          | 16T, 73, 143, 150, 263, 310, 489, 709, 750, 1438, 2706, 3106N, 4769, 4833, 5108, 7028, 8701, 8860, 9540, 10398, 10400, 10873, 11719, 11914, 12705, 14569, 14766, 14783, 15043, 15301, 15326, 15746, 16215, 16223, 16225, 16274                                                                                                                             |
| K38848 | Tib_2 | Chamdo | M13a1b        | 73, 152, 263, 309+C, 315+C, 489, 750, 1438, 2706, 3106N, 3644, 4769, 5773, 6023, 6253, 6620, 7028, 8701, 8860, 9540, 10398, 10400, 10411, 10790, 10873, 11719, 12705, 13135, 14766, 14783, 15043, 15301, 15326, 15924, 16145, 16148, 16188, 16189, 16223, 16381                                                                                            |
| K38898 | Tib_2 | Chamdo | M9a1a1c1b1a4  | 73, 263, 310, 489, 711, 750, 1041, 1438, 2706, 3106N, 3394, 4491, 4769, 5899+XC, 7028, 7142, 7697, 8701, 8860, 9242, 9540, 10398, 10400, 10873, 11719, 12705, 14308, 14417, 14766, 14783, 15043, 15301, 15326, 15470, 16223, 16234, 16316, 16362, 16519                                                                                                    |
| K38039 | Tib_2 | Chamdo | A             | 73, 152, 182, 235, 263, 309+C, 315+C, 663, 750, 1438, 1736, 2706, 3106N, 4248, 4769, 4824, 7028, 8794, 8860, 11719, 12705, 13488, 14766, 15326, 16223, 16248, 16290, 16319, 16362                                                                                                                                                                          |
| K38095 | Tib_2 | Chamdo | C4a1a1a1      | 73, 249d, 263, 310, 489, 523-524d, 750, 1438, 1715, 2232+AA, 2706, 3106N, 3552A, 3576, 4715, 4769, 4884, 4958, 6026, 7028, 7196A, 7999, 8508, 8584, 8701, 8860, 9540, 9545, 10398, 10400, 10873, 11719, 11914, 11969, 12672, 12705, 13263, 14318, 14766, 14783, 15043, 15204, 15301, 15326, 15487T, 15968, 16093, 16129, 16223, 16224, 16298, 16327, 16519 |
| K38182 | Tib_2 | Chamdo | D4b2b9        | 73, 194, 263, 310, 489, 523-524d, 750, 1382C, 1438, 2706, 3010, 3106N, 4769, 4883, 5178A, 7028, 8020, 8414, 8545, 8701, 8860, 8964, 9296, 9540, 9824A, 10398, 10400, 10873, 11719, 12705, 14668, 14751, 14766, 14783, 15043, 15301, 15326, 16111, 16223, 16362, 16519                                                                                      |
| K38183 | Tib_2 | Chamdo | F1g           | 73, 249d, 263, 309+CC, 315+C, 523-524d, 750, 1438, 2389, 2706, 3106N, 3398, 3970, 4769, 6260, 6392, 6962, 7028, 8860, 10310, 10609, 11719, 12406, 12882, 13928C, 14766, 15326, 16183C, 16189, 16193+CC, 16304, 16519                                                                                                                                       |

|        |       |        |              |                                                                                                                                                                                                                                                                                                                                                                                        |
|--------|-------|--------|--------------|----------------------------------------------------------------------------------------------------------------------------------------------------------------------------------------------------------------------------------------------------------------------------------------------------------------------------------------------------------------------------------------|
| K38249 | Tib_2 | Chamdo | G3a1a        | 16T, 73, 150, 152, 263, 309+C, 315+C, 489, 709, 750, 1438, 2706, 3106N, 4769, 4833, 5108, 7028, 8701, 8860, 8861, 9540, 10398, 10400, 10873, 11719, 11914, 12705, 13279, 14569, 14766, 14783, 15043, 15301, 15326, 15746, 16215, 16223, 16274                                                                                                                                          |
| K38986 | Tib_2 | Chamdo | M11a2        | 73, 146, 198, 200, 215, 263, 309+C, 315+C, 318, 326, 489, 750, 1095, 1438, 2706, 2850, 3106N, 4769, 6531, 7028, 7642, 8108, 8701, 8860, 9540, 9950, 10398, 10400, 10873, 11404, 11719, 11969, 12705, 13074, 13563, 14340, 14766, 14783, 15043, 15301, 15326, 16173, 16223, 16301                                                                                                       |
| K38097 | Tib_2 | Chamdo | M9a1a1c1b1a  | 73, 143, 263, 309+C, 315+C, 489, 711, 750, 1041, 1438, 2706, 3106N, 3394, 4491, 4769, 5894C, 7028, 7142, 7697, 8425, 8701, 8860, 9242, 9540, 10398, 10400, 10873, 11719, 12681, 12705, 14308, 14417, 14766, 14783, 15043, 15301, 15326, 16223, 16234, 16362                                                                                                                            |
| K37106 | Tib_2 | Chamdo | N9a1         | 73, 150, 263, 309+CC, 315+C, 750, 1438, 2706, 3106N, 3846A, 4386, 4769, 5231, 5417, 6366, 7028, 7424, 7711, 8860, 11279, 11719, 12007, 12358, 12372, 12705, 14766, 15326, 16111, 16129, 16223, 16257A, 16261                                                                                                                                                                           |
| K38363 | Tib_2 | Chamdo | A11b         | 73, 152, 235, 263, 309+C, 315+C, 523-524d, 663, 750, 1438, 1736, 2706, 3106N, 3290, 4248, 4769, 4824, 7028, 8794, 8860, 9338, 9650, 11719, 12705, 14766, 15326, 16223, 16234, 16290, 16293C, 16319, 16357, 16519, 16527                                                                                                                                                                |
| K38226 | Tib_2 | Chamdo | B4h1         | 73, 195, 263, 309d, 315+C, 750, 1438, 2706, 3106N, 3398, 4703, 4769, 5093, 7028, 7080, 8158, 8281-8289d, 8790, 8860, 11719, 13269, 13710, 14766, 15326, 16129, 16189, 16261                                                                                                                                                                                                            |
| K38272 | Tib_2 | Chamdo | F2c1         | 73, 249d, 263, 310, 750, 1005, 1438, 1824, 2706, 3106N, 3970, 4769, 6392, 7028, 7828, 8860, 10310, 10535, 10586, 11150, 11719, 12338, 13708, 13722, 13928C, 14766, 15326, 15714, 16037, 16183C, 16189, 16304, 16355, 16519                                                                                                                                                             |
| K38248 | Tib_2 | Chamdo | G3a1a1a      | 16T, 73, 143, 150, 152, 263, 310, 489, 709, 750, 1438, 2706, 3106N, 4674, 4769, 4833, 5108, 7028, 8347, 8701, 8860, 8861, 9540, 10398, 10400, 10873, 11719, 11914, 12030, 12612, 12705, 14569, 14766, 14783, 15043, 15301, 15326, 15746, 16215, 16223, 16274                                                                                                                           |
| K38392 | Tib_2 | Chamdo | M11a2        | 73, 146, 198, 215, 263, 310, 318, 326, 489, 739, 750, 1095, 1438, 2706, 3106N, 3523, 4769, 6531, 7028, 7642, 8108, 8230, 8701, 8860, 9540, 9950, 10398, 10400, 10873, 10993, 11719, 11969, 12141, 12705, 13074, 14340, 14766, 14783, 15043, 15204, 15301, 15326, 16051, 16173, 16223                                                                                                   |
| K38367 | Tib_2 | Chamdo | M11a2a1      | 73, 146, 200, 215, 263, 309+C, 315+C, 318, 326, 489, 523-524d, 750, 1095, 1438, 1822, 2706, 3106N, 4769, 6531, 7028, 7055, 7642, 8108, 8277, 8288-8289d, 8477, 8701, 8860, 9540, 9950, 10398, 10400, 10873, 11404, 11719, 11969, 12705, 13074, 14340, 14766, 14783, 15043, 15301, 15326, 16173, 16223, 16257, 16362                                                                    |
| K38218 | Tib_2 | Chamdo | M13a1b       | 73, 152, 263, 310, 489, 750, 1438, 2706, 3106N, 3644, 4769, 5773, 6023, 6253, 6620, 7028, 8701, 8860, 9540, 10398, 10400, 10411, 10790, 10873, 11719, 12705, 13135, 14766, 14783, 15043, 15301, 15326, 15924, 16145, 16148, 16188, 16189, 16223, 16381, 16497                                                                                                                          |
| K38278 | Tib_2 | Chamdo | M61a         | 73, 152, 263, 309+C, 315+C, 489, 750, 980, 1193, 1342, 1438, 2706, 3106N, 3438, 4769, 5582C, 6253, 7028, 8269, 8701, 8790, 8860, 9540, 10398, 10400, 10873, 11719, 11810, 12705, 12732, 14766, 14783, 15043, 15301, 15326, 16093, 16223, 16270, 16362, 16381, 16519                                                                                                                    |
| K38330 | Tib_2 | Chamdo | M8a1         | 73, 263, 310, 489, 750, 1438, 2706, 3106N, 4314d, 4715, 4769, 6179, 7028, 7196A, 7861, 8453, 8584, 8684, 8701, 8860, 9540, 10398, 10400, 10873, 11719, 12705, 14470, 14766, 14783, 15043, 15047, 15301, 15326, 15487T, 15697, 16223, 16298, 16319                                                                                                                                      |
| K38232 | Tib_2 | Chamdo | M9a1a1c1b1a6 | 73, 263, 309+C, 315+C, 489, 711, 750, 1041, 1438, 2706, 3106N, 3394, 4491, 4769, 7028, 7142, 7697, 8701, 8860, 9242, 9540, 9632, 10398, 10400, 10873, 11719, 12705, 14308, 14417, 14766, 14783, 15043, 15301, 15326, 16223, 16234, 16316, 16362                                                                                                                                        |
| K38230 | Tib_2 | Chamdo | M9a1a1c1b1a  | 73, 263, 309+CC, 315+C, 489, 711, 750, 1041, 1438, 2667, 2706, 3106N, 3394, 4491, 4769, 5899+XC, 7028, 7142, 7697, 8701, 8860, 9242, 9540, 10398, 10400, 10873, 11719, 12705, 14308, 14417, 14766, 14783, 15043, 15301, 15310, 15326, 16223, 16234, 16316, 16362                                                                                                                       |
| K38280 | Tib_2 | Chamdo | M9a1a1c1b1a2 | 73, 146, 263, 297, 309+CC, 315+C, 489, 711, 750, 1041, 1438, 2706, 3106N, 3394, 3438, 4491, 4769, 5899+XC, 6446, 7028, 7142, 7697, 8701, 8860, 9242, 9540, 10398, 10400, 10873, 11719, 12705, 14308, 14417, 14766, 14783, 15043, 15301, 15326, 16223, 16234, 16316, 16362                                                                                                              |
| K38275 | Tib_2 | Chamdo | M13a1b       | 73, 152, 263, 310, 489, 750, , 1438, , 2706, 3106N, 3644, 4769, 5773, 6023, 6253, 6620, 7028, 8155, 8701, 8860, 9540, 10398, 10400, 10411, 10790, 10873, 11719, 12705, 13135, 14766, 14783, 15043, 15301, 15326, 15924, 16145, 16148, 16188, 16189, 16223, 16381                                                                                                                       |
| K39041 | Tib_2 | Chamdo | G3a1a        | 16T, 73, 143, 150, 263, 315+C, 489, 709, 750, 825A, 1106, 1151A, 1173, 1185, 1211, 1227, 1230, 1231T, 1249, 1303, 1315, 1320, 1438, 2523, 2557, 2625, 2667, 2706, 3106N, 4769, 4833, 5108, 5703, 7028, 8701, 8860, 8861, 9540, 10172, 10398, 10400, 10873, 11719, 11914, 12705, 14569, 14766, 14783, 15043, 15226, 15301, 15326, 15746, 16215, 16223, 16274                            |
| K38703 | Tib_2 | Chamdo | M13a2a1c     | 73, 152, 263, 315+C, 489, 513, 750, 825A, 1211, 1438, 1883, 1888, 1977, 2523, 2557, 2625, 2667, 2706, 2786, 3106N, 3644, 4596, 4769, 5773, 6023, 6253, 6620, 7028, 8405, 8563, 8701, 8860, 9540, 10373, 10398, 10400, 10411, 10790, 10873, 11204, 11719, 12705, 13395, 14766, 14783, 15043, 15236, 15301, 15326, 15924, 15944d, 16145, 16168, 16188, 16223, 16257, 16311, 16362, 16519 |

|        |       |        |             |                                                                                                                                                                                                                                                                                                                     |
|--------|-------|--------|-------------|---------------------------------------------------------------------------------------------------------------------------------------------------------------------------------------------------------------------------------------------------------------------------------------------------------------------|
| K38421 | Tib_2 | Chamdo | G2a1h       | 73, 263, 310, 403, 489, 709, 750, 1438, 2706, 3106N, 3777, 4769, 5108, 5601, 7028, 7600, 8307, 8701, 8860, 9377, 9540, 9575, 10398, 10400, 10873, 11719, 12705, 13194, 13563, 14200, 14569, 14766, 14783, 15043, 15301, 15326, 16223, 16227, 16278, 16362                                                           |
| K38790 | Tib_2 | Chamdo | G3a1a       | 16T, 73, 143, 150, 263, 309+CC, 315+C, 489, 524+AC, 709, 750, 1438, 2706, 3106N, 4769, 4833, 5108, 7028, 8701, 8860, 8861, 9540, 10398, 10400, 10873, 11719, 11914, 12705, 14569, 14766, 14783, 15043, 15301, 15326, 15746, 16215, 16223, 16274                                                                     |
| K39038 | Tib_2 | Chamdo | M9a1a1c1b1a | 73, 263, 309+CC, 315+C, 489, 711, 750, 1041, 1438, 2706, 3106N, 3394, 4491, 4769, 5899+XC, 6680, 7028, 7142, 7697, 8701, 8860, 9242, 9540, 10398, 10400, 10873, 11719, 12477, 12705, 13681, 14308, 14417, 14766, 14783, 15043, 15301, 15326, 16223, 16234, 16316, 16355, 16362                                      |
| K38184 | Tib_2 | Chamdo | D4j1a1f     | 73, 263, 310, 489, 750, 1438, 2706, 3010, 3106N, 4769, 4883, 5178A, 5262, 6383, 7028, 7375, 7581, 7783, 8414, 8701, 8860, 9053, 9540, 10398, 10400, 10873, 10933, 11696, 11719, 11963, 12130, 12358, 12705, 14668, 14766, 14783, 15043, 15295, 15301, 15326, 16086, 16223, 16362                                    |
| K38634 | Tib_2 | Chamdo | F1g1        | 73, 249d, 263, 309+C, 315+C, 523-524d, 750, 1438, 2389, 2706, 3106N, 3203, 3398, 3621, 3970, 4769, 6351, 6392, 6962, 7028, 8648, 8860, 10310, 10609, 11335, 11719, 12406, 12882, 13928C, 14766, 14798, 15326, 15499, 16093, 16183C, 16189, 16193+C, 16304, 16519                                                    |
| K38285 | Tib_2 | Chamdo | G3b1a1      | 73, 195, 263, 309+C, 315+C, 489, 523-524d, 709, 750, 1438, , 2706, 3106N, 4769, 4833, 5108, 7028, 8701, 8860, 9540, 9599, 10398, 10400, 10511, 10873, 11719, 12705, 13477, 14569, 14605, 14766, 14783, 15043, 15301, 15326, 15927, 16223, 16249, 16274, 16362                                                       |
| K38714 | Tib_2 | Chamdo | A           | 73, 152, 235, 263, 310, 663, 750, 1438, 1736, 2706, 3106N, 4248, 4769, 4824, 6040, 7028, 8794, 8860, 11719, 12705, 14766, 15326, 16092, 16223, 16290, 16319, 16362                                                                                                                                                  |
| K38493 | Tib_2 | Chamdo | A11a1a3     | 73, 152, 235, 263, 309+C, 315+C, 663, 750, 1005, 1438, 1736, 2706, 3106N, 4248, 4769, 4824, 5899+XC, 6755, 7028, 8794, 8843, 8860, 9650, 11719, 12705, 13708, 14766, 15326, 16094, 16223, 16290, 16293C, 16319, 16519                                                                                               |
| K38420 | Tib_2 | Chamdo | A11a1a4     | 73, 152, 182CT, 235, 263, 309+CC, 315+C, 523-524d, 663, 750, 1005, 1438, 1736, 2706, 3106N, 4248, 4769, 4824, 5899+XC, 6755, 7028, 8794, 8843, 8860, 9055, 9650, 11719, 12705, 14766, 15326, 16223, 16290, 16293C, 16319                                                                                            |
| K38233 | Tib_2 | Chamdo | A21c        | 73, 151, 152, 235, 263, 310, 663, 750, 1438, 1736, 1888, 2706, 3106N, 4248, 4769, 4824, 7028, 8506, 8794, 8860, 11719, 12705, 13145, 14364, 14766, 14962, 15326, 16223, 16290, 16319, 16362                                                                                                                         |
| K38960 | Tib_2 | Chamdo | C4a2c2      | 73, 249d, 263, 309+C, 315+C, 489, 750, 1438, 2232+A, 2706, 3106N, 3394, 3552A, 4715, 4769, 6026, 7028, 7196A, 8584, 8701, 8860, 9540, 9545, 10398, 10400, 10873, 11719, 11914, 11969, 12672, 12705, 13263, 13967, 14318, 14766, 14783, 15043, 15204, 15301, 15326, 15487T, 16086, 16223, 16298, 16327, 16357, 16519 |
| K38992 | Tib_2 | Chamdo | D4b2b8      | 73, 152, 194, 263, 309+C, 315+C, 390, 489, 523-524d, 750, 1382C, 1438, 2706, 3010, 3106N, 3398, 4769, 4883, 5178A, 7028, 8020, 8414, 8701, 8754, 8860, 8964, 9296, 9540, 9824A, 10398, 10400, 10873, 11719, 12705, 13500, 14668, 14766, 14783, 15043, 15301, 15326, 15613, 16223, 16362, 16519                      |
| K38792 | Tib_2 | Chamdo | D4b2b9      | 73, 194, 263, 310, 489, 523-524d, 750, 1382C, 1438, 2706, 3010, 3106N, 3316, 4491, 4769, 4883, 5178A, 7028, 7849, 8020, 8414, 8545, 8701, 8805, 8860, 8964, 9296, 9540, 9824A, 10398, 10400, 10873, 11719, 12705, 14668, 14751, 14766, 14783, 15043, 15301, 15326, 16111, 16223, 16362, 16519                       |
| K39009 | Tib_2 | Chamdo | D4j1a2      | 73, 263, 309+C, 315+C, 489, 750, 1438, 2706, 3010, 3106N, 4769, 4883, 5178A, 5262, 7028, 7783, 7984GA, 8414, 8701, 8860, 9540, 10398, 10400, 10873, 11696, 11719, 12130, 12358, 12705, 13635, 14668, 14766, 14783, 15043, 15301, 15326, 16086, 16223, 16271, 16362                                                  |
| K38525 | Tib_2 | Chamdo | D5a2a1c     | 73, 150, 263, 310, 489, 523-524d, 750, 752, 1107, 2706, 2833, 3106N, 4769, 4883, 5178A, 5301, 7028, 8701, 8860, 9180, 9540, 10397, 10398, 10400, 10873, 11719, 11944, 12026, 12705, 14766, 14783, 15043, 15301, 15326, 16164, 16172, 16182C, 16183C, 16189, 16223, 16243, 16266, 16362                              |
| K38621 | Tib_2 | Chamdo | F1c1a1a     | 73, 152, 249d, 263, 309+C, 315+C, 523-524d, 573+XC, 709, 750, 1438, 2706, 3106N, 3768, 3970, 4769, 6392, 6599, 6962, 7028, 8860, 9053, 9647, 10310, 10454, 10609, 11719, 12406, 12882, 13759, 13928C, 14766, 15326, 16111, 16129, 16266, 16304, 16519                                                               |
| K38263 | Tib_2 | Chamdo | F1c1a1a2    | 73, 143, 152, 249d, 263, 309+C, 315+C, 523-524d, 573+XC, 709, 750, 1438, 2706, 3106N, 3970, 4769, 6392, 6599, 6962, 7028, 8412, 8701, 8860, 9053, 9647, 10310, 10454, 10609, 10739, 11719, 12406, 12882, 13759, 13928C, 14766, 15326, 16111, 16129, 16266, 16304, 16519                                             |
| K38231 | Tib_2 | Chamdo | F1d         | 73, 146, 185, 235, 249d, 263, 309+C, 315+C, 523-524d, 750, 1438, 1734, 2706, 3106N, 3849, 3864, 3970, 4769, 5460, 5628, 6392, 6962, 7028, 7424, 7738, 8020, 8860, 10310, 10609, 11092, 11719, 12406, 12882, 13928C, 14766, 15326, 15402, 16304, 16519                                                               |
| K38181 | Tib_2 | Chamdo | F1d         | 73, 146, 249d, 263, 309+C, 315+C, 523-524d, 750, 1438, 1734, 2706, 3106N, 3970, 4769, 5460, 5628, 6392, 6962, 7028, 7738, 8860, 10310, 10609, 11092, 11719, 12406, 12882, 13928C, 14766, 15326, 15402, 16304, 16519                                                                                                 |
| K39045 | Tib_2 | Chamdo | F1d1a1      | 73, 146, 249d, 263, 310, 523-524d, 750, 1438, 1734, 2706, 3106N, 3970, 4769, 5628, 6392, 6962, 7028, 7738, 8860, 10310, 10609, 11719, 12406, 12882, 13135, 13928C, 14766, 14782, 15326, 15402, 16240, 16284, 16304, 16519                                                                                           |

|        |       |        |              |                                                                                                                                                                                                                                                                                                                                          |
|--------|-------|--------|--------------|------------------------------------------------------------------------------------------------------------------------------------------------------------------------------------------------------------------------------------------------------------------------------------------------------------------------------------------|
| K38409 | Tib_2 | Chamdo | G3a1a2       | 16T, 73, 143, 150, 263, 309+C, 315+C, 489, 709, 750, 1438, 2706, 3106N, 4769, 4833, 5108, 6962, 7028, 8701, 8860, 8861, 9540, 10398, 10400, 10873, 11719, 11914, 12705, 14569, 14766, 14783, 15043, 15301, 15326, 15465, 15497, 15746, 16148, 16153, 16215, 16223, 16274                                                                 |
| K38894 | Tib_2 | Chamdo | M13a2a1b     | 73, , 263, 309+C, 315+C, 489, 513, 523-524d, 750, 1438, 2706, 2786, 3106N, 3644, 4769, 5773, 6023, 6253, 6620, 7028, 8405, 8701, 8860, 9540, 10235, 10373, 10398, 10400, 10411, 10790, 10873, 11719, 12705, 13395, 14766, 14783, 15043, 15301, 15326, 15924, 15944d, 16145, 16168, 16188, 16223, 16257, 16311, 16519                     |
| K38492 | Tib_2 | Chamdo | M62b1b       | 73, 150, 203, 204, 263, 309+C, 315+C, 489, 750, 1438, 2706, 2735, 3030, 3106N, 3511, 4561, 4769, 7028, 7664, 8149, 8701, 8860, 9540, 10398, 10400, 10410, 10873, 11719, 12705, 13708, 14766, 14783, 15043, 15301, 15326, 15510, 15520, 15629, 15721, 16183C, 16189, 16193+C, 16223, 16260, 16295, 16519                                  |
| K39036 | Tib_2 | Chamdo | M62b1a1b     | 73, 150, 203, 204, 263, 309+C, 315+C, 489, 750, 1438, 2706, 2735, 3106N, 3511, 4561, 4769, 7028, 7664, 7844, 8149, 8281-8289d, 8701, 8860, 9540, 10398, 10400, 10873, 10978, 11431, 11719, 12705, 13708, 14766, 14783, 15043, 15301, 15326, 15510, 15520, 15629, 15721, 16169, 16223, 16260, 16519                                       |
| K38846 | Tib_2 | Chamdo | M62b1a1b     | 73, 150, 203, 204, 263, 309+C, 315+C, 489, 750, 1438, 2706, 2735, 3106N, 3511, 4561, 4769, 7028, 7664, 7844, 7930, 8149, 8281-8289d, 8701, 8860, 9540, 10398, 10400, 10873, 10978, 11431, 11719, 12705, 13708, 14766, 14783, 15043, 15301, 15326, 15510, 15520, 15629, 15721, 16169, 16223, 16260, 16519                                 |
| K38441 | Tib_2 | Chamdo | M9a1a1c1b1a8 | 73, 263, 309+CC, 315+C, 489, 711, 750, 1041, 1438, 2706, 3106N, 3394, 4491, 4769, 7028, 7142, 7697, 8701, 8860, 9242, 9540, 10398, 10400, 10873, 11719, 12705, 13419, 14308, 14417, 14766, 14783, 15043, 15301, 15326, 16223, 16234, 16316, 16362                                                                                        |
| K38500 | Tib_2 | Chamdo | M9a1b1d      | 73, 150, 152, 153, 263, 310, 489, 750, 1041, 1438, 2706, 3106N, 3394, 4491, 4769, 7028, 8701, 8860, 9540, 10398, 10400, 10873, 11719, 12362, 12705, 14308, 14766, 14783, 15043, 15119, 15301, 15326, 15671, 16158, 16223, 16234, 16362, 16519                                                                                            |
| K38885 | Tib_2 | Chamdo | Z3a          | 73, 249d, 263, 279, 309+C, 315+C, 489, 750, 1438, 1700, 2706, 3106N, 4491, 4715, 4769, 5399, 6752, 7028, 7196A, 8584, 8701, 8860, 9090, 9128, 9540, 9713, 10208, 10286, 10398, 10400, 10873, 11719, 12705, 12810, 13620, 13942, 14766, 14783, 15043, 15301, 15326, 15487T, 15784, 15928, 16137, 16185, 16215, 16223, 16260, 16298, 16355 |
| K38385 | Tib_2 | Chamdo | C4a2c2       | 73, 249d, 263, 310, 489, 750, 1438, 2232+A, 2706, 3106N, 3394, 3552A, 4715, 4769, 6026, 7028, 7196A, 8584, 8701, 8860, 9540, 9545, 10398, 10400, 10873, 11719, 11914, 11969, 12672, 12705, 13263, 13967, 14318, 14488, 14766, 14783, 15043, 15204, 15301, 15487T, 16086, 16223, 16298, 16327, 16357, 16519                               |
| K39028 | Tib_2 | Chamdo | D5a2a1d      | 73, 150, 225T, 263, 309+C, 315+C, 489, 523-524d, 650, 750, 752, 1107, 2706, 3106N, 3402, 4769, 4883, 5178A, 5301, 7028, 8701, 8860, 9180, 9540, 10397, 10398, 10400, 10873, 11152, 11719, 11944, 12026, 12705, 14766, 14783, 15043, 15301, 15326, 16093?, 16164, 16172, 16182C, 16183C, 16189, 16223, 16266, 16362                       |
| K38847 | Tib_2 | Chamdo | M9a1a1c1b1a  | 73, 263, 310, 489, 711, 750, 1041, 1438, 2706, 3106N, 3394, 4491, 4769, 5899+XC, 7028, 7142, 7697, 8701, 8860, 9242, 9540, 10398, 10400, 10604, 10873, 11719, 12705, 14308, 14417, 14766, 14783, 15043, 15301, 15326, 16223, 16234, 16316, 16362                                                                                         |
| K39031 | Tib_2 | Chamdo | G2a1f        | 73, 263, 310, 489, 709, 750, 1438, 2706, 3106N, 3243AG, 4769, 4833, 5108, 5601, 7028, 7600, 8701, 8860, 9377, 9540, 9575, 10398, 10400, 10873, 11719, 12705, 13563, 13884, 14200, 14569, 14766, 14783, 15043, 15301, 15326, 16051, 16114, 16223, 16227, 16278, 16291, 16362                                                              |
| K39017 | Tib_2 | Chamdo | A14a1        | 73, 151, 152, 200, 235, 263, 310, 523-524d, 663, 735, 750, 1438, 1736, 2706, 3106N, 4248, 4769, 4824, 7028, 8334, 8794, 8860, 8862, 11719, 12004, 12705, 12990, 14766, 14803, 15326, 16093, 16172, 16223, 16290, 16319, 16362                                                                                                            |
| K38935 | Tib_2 | Chamdo | D5a2a1d      | 73, 150, 263, 309+C, 315+C, 489, 523-524d, 650, 750, 752, 1107, 2706, 3106N, 3402, 4769, 4883, 5178A, 5301, 7028, 8701, 8860, 9180, 9540, 10397, 10398, 10400, 10873, 11152, 11719, 11944, 12026, 12358, 12705, 14766, 14783, 15043, 15301, 15326, 16164, 16172, 16182C, 16183C, 16189, 16209, 16223, 16266, 16362                       |
| K38928 | Tib_2 | Chamdo | M9a1b2       | 73, 150, 152, 263, 309+CC, 315+C, 489, 750, 1041, 1438, 2706, 3106N, 3394, 4491, 4721, 4769, 7028, 8701, 8860, 9540, 10398, 10400, 10873, 10951A, 11719, 12362, 12705, 13563, 14308, 14766, 14783, 15043, 15301, 15326, 15671, 16223, 16234, 16362, 16519                                                                                |
| K38902 | Tib_2 | Chamdo | D4h4         | 73, 195, 225, 263, 309+CC, 315+C, 335, 489, 593TC, 750, 1438, 2706, 3010, 3106N, 3336, 3644, 4769, 4883, 5048, 5074, 5178A, 7028, 7502, 8414, 8701, 8860, 9540, 10398, 10400, 10873, 11719, 12705, 14668, 14766, 14783, 15022, 15043, 15301, 15326, 16051, 16223, 16311, 16362                                                           |
| K38852 | Tib_2 | Chamdo | B4a1         | 73, 263, 309+CC, 315+C, 523-524d, 750, 1438, 2706, 3106N, 4769, 5465, 7028, 7340, 8281-8289d, 8860, 8886, 9123, 9233, 10238, 11719, 14562, 14766, 15326, 15670, 16182C, 16183C, 16189, 16217, 16261, 16348, 16519                                                                                                                        |
| K38764 | Tib_2 | Chamdo | F1c1a1a1     | 73, 152, 249d, 263, 310, 523-524d, 709, 750, 1438, 2706, 3106N, 3970, 4769, 6392, 6599, 6962, 7028, 8860, 9053, 9647, 10310, 10454, 10609, 11719, 12406, 12882, 13759, 13928C, 14766, 15244, 15326, 16111, 16129, 16304, 16519                                                                                                           |
| K38739 | Tib_2 | Chamdo | D4b2b9       | 73, 194, 263, 310, 489, 523-524d, 750, 1382C, 1438, 2706, 3010, 3106N, 4769, 4883, 5178A, 7028, 8020, 8414, 8545, 8701, 8860, 8964, 9296, 9540, 9824A, 10398, 10400, 10873, 11719, 12705, 14668, 14751, 14766, 14783, 15043, 15301, 15326, 16111, 16223, 16362, 16519                                                                    |



|        |       |        |               |                                                                                                                                                                                                                                                                                                                                                                  |
|--------|-------|--------|---------------|------------------------------------------------------------------------------------------------------------------------------------------------------------------------------------------------------------------------------------------------------------------------------------------------------------------------------------------------------------------|
| K38629 | Tib_2 | Chamdo | M9a1a1c1b1a   | 73, 263, 309+C, 315+C, 489, 711, 750, 1041, 1438, 2706, 3106N, 3394, 4491, 4769, 5899+XC, 7028, 7142, 7697, 8701, 8860, 9242, 9540, 10398, 10400, 10873, 11719, 12705, 14308, 14417, 14766, 14783, 15043, 15301, 15326, 16092, 16174, 16223, 16234, 16316, 16344, 16362                                                                                          |
| K38598 | Tib_2 | Chamdo | G2b1b         | 73, 263, 309+C, 315+C, 489, 709, 750, 1438, 2706, 3106N, 4769, 4833, 4853, 5108, 5601, 7028, 8701, 8860, 8877, 9540, 10398, 10400, 10873, 11719, 12375, 12705, 13563, 14569, 14766, 14783, 15043, 15301, 15326, 16223, 16362                                                                                                                                     |
| K38499 | Tib_2 | Chamdo | M9a1b1d       | 73, 150, 152, 153, 263, 310, 489, 750, 1041, 1438, 2706, 3106N, 3394, 4491, 4769, 7028, 8701, 8860, 9540, 10398, 10400, 10873, 11719, 12362, 12705, 14308, 14766, 14783, 15043, 15119, 15301, 15326, 15671, 16158, 16223, 16234, 16362, 16519                                                                                                                    |
| K38494 | Tib_2 | Chamdo | D4h           | 73, 263, 310, 489, 571G, 750, 1438, 2706, 3010, 3106N, 3336, 3644, 3818, 4580, 4769, 4883, 5048, 5178A, 6663, 7028, 8414, 8701, 8860, 9424, 9540, 10192, 10398, 10400, 10873, 11719, 12705, 13879, 14668, 14766, 14783, 15043, 15301, 15326, 16223, 16362, 16519                                                                                                 |
| K38453 | Tib_3 | Lhasa  | D4s           | 73, 199, 263, 309+CC, 315+C, 489, 750, 813, 1438, 2706, 3010, 3106N, 4769, 4883, 5178A, 5483, 7028, 8414, 8701, 8860, 9540, 9944, 10321, 10398, 10400, 10873, 11719, 11986, 12705, 14668, 14766, 14783, 15043, 15301, 15326, 15734, 16223, 16362, 16519                                                                                                          |
| K38148 | Tib_3 | Lhasa  | M9a1a1c1b1a11 | 73, 263, 309+C, 315+C, 489, 711, 750, 1041, 1438, 2706, 3106N, 3221, 3394, 4491, 4769, 5492, 5582, 5899+XC, 7028, 7142, 7697, 8701, 8860, 9139, 9242, 9540, 10398, 10400, 10873, 11719, 12705, 14308, 14417, 14766, 14783, 15043, 15301, 15326, 16223, 16234, 16316, 16362                                                                                       |
| K38144 | Tib_3 | Lhasa  | U7a           | 73, 151, 152, 263, 309+C, 315+C, 523-524d, 750, 980, 1438, 1811, 2706, 3106N, 3741, 4769, 5360, 7028, 8137, 8684, 8860, 10142, 11399, 11467, 11719, 12308, 12372, 13500, 14569, 14766, 15326, 16309, 16318T, 16519                                                                                                                                               |
| K38200 | Tib_3 | Lhasa  | G2b1b1        | 73, 263, 309+C, 315+C, 489, 709, 750, 1438, 2706, 3106N, 3221, 4769, 4833, 4853, 5108, 5601, 7028, 8701, 8860, 8877, 9540, 10398, 10400, 10873, 11719, 12375, 12705, 13563, 14569, 14766, 14783, 15043, 15301, 15326, 16223, 16269, 16362                                                                                                                        |
| K38188 | Tib_3 | Lhasa  | M9a1a1c1b1a   | 73, 189, 263, 309+C, 315+C, 489, 711, 750, 1041, 1438, 2706, 3106N, 3394, 4491, 4769, 5899+XC, 7028, 7142, 7697, 8701, 8860, 9242, 9540, 10398, 10400, 10873, 11719, 12705, 14308, 14417, 14766, 14783, 15043, 15301, 15326, 16223, 16234, 16316, 16362, 16519                                                                                                   |
| K38171 | Tib_3 | Lhasa  | G2a1h1        | 73, 146, 263, 283, 309+CC, 315+C, 489, 709, 750, 1438, 2706, 3106N, 4158, 4769, 4833, 5108, 5601, 7028, 7600, 8701, 8860, 9377, 9540, 9575, 10398, 10400, 10873, 11719, 12705, 13194, 13563, 14200, 14569, 14766, 14783, 15043, 15301, 15326, 16223, 16227, 16278, 16362                                                                                         |
| K38169 | Tib_3 | Lhasa  | M9a1a1c1b1a6  | 73, 263, 309+C, 315+C, 489, 711, 750, 1041, 1438, 2706, 3106N, 3394, 4491, 4769, 7028, 7142, 7697, 7754, 8597, 8701, 8860, 9242, 9540, 9632, 10398, 10400, 10873, 11719, 12705, 14308, 14417, 14422, 14766, 14783, 15043, 15301, 15326, 16223, 16234, 16316, 16362                                                                                               |
| K38165 | Tib_3 | Lhasa  | C4a1a1a1      | 73, 249d, 263, 310, 489, 523-524d, 750, 1438, 1715, 2232+AA, 2706, 3106N, 3327, 3552A, 3576, 4715, 4769, 4884, 4958, 6026, 7028, 7196A, 7999, 8508, 8584, 8701, 8860, 9540, 9545, 10398, 10400, 10873, 11719, 11914, 11969, 12672, 12705, 13263, 14318, 14766, 14783, 15043, 15204, 15301, 15326, 15487T, 15968, 16093, 16129, 16223, 16224, 16298, 16327, 16519 |
| K38088 | Tib_3 | Lhasa  | M13a2         | 73, 152, 195, 263, 310, 489, 513, 749, 750, 1438, 2706, 2786, 3106N, 3644, 4769, 5773, 6023, 6253, 6620, 7028, 8405, 8701, 8860, 9540, 10373, 10398, 10400, 10411, 10790, 10873, 11719, 12705, 13395, 14766, 14783, 15043, 15301, 15326, 15924, 15944d, 16145, 16168, 16188, 16223, 16257, 16311, 16519                                                          |
| K38053 | Tib_3 | Lhasa  | G2b1b2a       | 73, 263, 309+C, 315+C, 489, 709, 750, 1438, 2706, 3106N, 3975, 4769, 4833, 4853, 5108, 5601, 7028, 8701, 8764, 8860, 8877, 9540, 10398, 10400, 10873, 11719, 12285, 12375, 12705, 12795, 13563, 14563G, 14569, 14766, 14783, 15043, 15301, 15326, 16037, 16223, 16324, 16362                                                                                     |
| K38028 | Tib_3 | Lhasa  | G2a1h1        | 73, 146, 263, 283, 309+C, 315+C, 489, 709, 750, 1438, 2706, 3106N, 4158, 4769, 4833, 4917, 5108, 5601, 7028, 7600, 8701, 8860, 9377, 9540, 9575, 10398, 10400, 10873, 11719, 12705, 13194, 13563, 14200, 14569, 14766, 14783, 15043, 15301, 15326, 15773, 16080, 16223, 16227, 16278, 16362                                                                      |
| K38199 | Tib_3 | Lhasa  | F1g           | 73, 249d, 263, 309+CC, 315+C, 523-524d, 750, 1438, 2389, 2706, 3106N, 3398, 3970, 4769, 6392, 6962, 7028, 8860, 10310, 10609, 11719, 12406, 12882, 13928C, 14766, 15326, 16183C, 16189, 16304, 16519                                                                                                                                                             |
| K38444 | Tib_3 | Lhasa  | M10a1b        | 73, 263, 309+C, 315+C, 489, 567C, 709, 750, 1438, 1719, 2706, 3106N, 3172+C, 4140, 4769, 7028, 7250, 8701, 8793, 8856, 8860, 9540, 10398, 10400, 10646, 10873, 11719, 12549, 12705, 13152, 13466, 13768, 14502, 14766, 14783, 15040, 15043, 15071, 15218, 15301, 15326, 16066, 16175C, 16223, 16311, 16519                                                       |
| K38179 | Tib_3 | Lhasa  | M9a1a1c1b1a5  | 73, 263, 309+C, 315+C, 489, 711, 750, 1041, 1438, 2706, 3106N, 3394, 4491, 4769, 5899+XC, 7028, 7142, 7697, 8701, 8860, 9242, 9540, 10398, 10400, 10873, 11719, 12705, 14308, 14766, 14783, 15043, 15301, 15326, 15766, 16223, 16234, 16316, 16362                                                                                                               |
| K38246 | Tib_3 | Lhasa  | M9a1b1e       | 73, 150, 152, 153, 263, 310, 489, 709, 750, 1041, 1438, 2706, 3106N, 3394, 4491, 4769, 7028, 8701, 8860, 9540, 10398, 10400, 10873, 11719, 12362, 12705, 14308, 14766, 14783, 15043, 15301, 15326, 15671, 16158, 16223, 16234, 16362, 16519                                                                                                                      |
| K38294 | Tib_3 | Lhasa  | Z3a           | 73, 152, 207, 249d, 263, 309+CC, 315+C, 489, 750, 1393, 1438, 2706, 3106N, 4715, 4769, 6752, 7028, 7196A, 7775, 8292, 8584, 8701, 8860, 9090, 9540, 9713, 10208, 10398, 10400, 10527, 10873, 11719, 12705, 13620, 14766, 14783, 15043, 15301, 15326, 15487T, 15784, 15928, 16185, 16223, 16260, 16298                                                            |

|        |       |       |              |                                                                                                                                                                                                                                                                                                                                 |
|--------|-------|-------|--------------|---------------------------------------------------------------------------------------------------------------------------------------------------------------------------------------------------------------------------------------------------------------------------------------------------------------------------------|
| K38198 | Tib_3 | Lhasa | A11a1a       | 73, 152, 235, 263, 309+C, 315+C, 523-524d, 663, 750, 1005, 1438, 1736, 2706, 3106N, 4248, 4769, 4824, 5899+XC, 6755, 7028, 8794, 8843, 8860, 9650, 11719, 12705, 14766, 15326, 16093, 16223, 16290, 16293C, 16319, 16519, 16527                                                                                                 |
| K38173 | Tib_3 | Lhasa | A11a1a       | 73, 152, 235, 263, 309+C, 315+C, 523-524d, 663, 750, 1005, 1438, 1736, 2706, 3106N, 4248, 4769, 4824, 5899+XC, 6755, 7028, 8794, 8843, 8860, 9650, 11719, 12705, 14766, 15326, 16223, 16290, 16293C, 16319                                                                                                                      |
| K38187 | Tib_3 | Lhasa | F1a1c        | 73, 249d, 263, 310, 523-524d, 548, 750, 1438, 2706, 3106N, 3970, 4086, 4769, 6392, 6962, 7028, 7804, 8410, 8860, 9053, 9548, 9554, 10211, 10310, 10609, 11719, 12406, 12882, 13149, 13759, 13928C, 14766, 15326, 16129, 16162, 16172, 16304, 16519                                                                              |
| K38445 | Tib_3 | Lhasa | F1b1c        | 73, 152, 249d, 263, 309+C, 315+C, 523-524d, 750, 1438, 2706, 3106N, 3970, 4732, 4769, 5147, 5508, 6392, 6962, 7028, 8860, 10235, 10310, 10609, 10976, 11719, 11732, 12406, 12882, 13928C, 14476, 14766, 15119, 15326, 16134, 16183C, 16189, 16232A, 16249, 16304, 16317, 16519                                                  |
| K38063 | Tib_3 | Lhasa | F1c1a1a      | 73, 152, 249d, 263, 309+CC, 315+C, 523-524d, 573+XC, 709, 750, 1438, 2706, 3106N, 3970, 4769, 6392, 6599, 6962, 7028, 8860, 9053, 9647, 10310, 10454, 10609, 11719, 11731C, 12406, 12501, 12882, 13759, 13928C, 14766, 15326, 16111, 16129, 16259, 16266, 16304, 16519                                                          |
| K38029 | Tib_3 | Lhasa | G2a1i        | 73, 263, 310, 489, 709, 750, 1438, 2706, 3106N, 4769, 5108, 5601, 7028, 7600, 8400, 8701, 8860, 9377, 9540, 9575, 10398, 10400, 10873, 11719, 12705, 13563, 14200, 14569, 14766, 14783, 15043, 15301, 15326, 16129, 16201, 16223, 16278, 16360, 16362, 16555                                                                    |
| K38084 | Tib_3 | Lhasa | M11a2a       | 73, 146, 198, 200, 215, 263, 310, 318, 326, 489, 750, 1095, 1438, 2706, 3106N, 4769, 5964, 6531, 7028, 7543, 7642, 8108, 8701, 8860, 9540, 9950, 10398, 10400, 10873, 11404, 11719, 11969, 12705, 13074, 14340, 14766, 14783, 15043, 15301, 15326, 15944d, 16093, 16173, 16223, 16311                                           |
| K38086 | Tib_3 | Lhasa | M13a2a1b     | 73, 152, 263, 309+C, 315+C, 489, 513, 523-524d, 750, 1438, 2706, 2786, 3106N, 3644, 4769, 5773, 6023, 6253, 6620, 7028, 8405, 8701, 8860, 9540, 10235, 10373, 10398, 10400, 10411, 10790, 10873, 11719, 12705, 13395, 14766, 14783, 15043, 15301, 15326, 15773, 15924, 15944d, 16145, 16168, 16188, 16223, 16257, 16311, 16519  |
| K38147 | Tib_3 | Lhasa | M62b1b1      | 73, 150, 203, 204, 263, 309+C, 315+C, 457, 489, 524+AC, 750, 1438, 2706, 2735, 3030, 3106N, 3511, 4561, 4769, 7028, 7609, 7664, 7807, 8149, 8701, 8860, 9540, 10398, 10400, 10873, 11719, 12705, 13708, 14766, 14783, 15043, 15301, 15326, 15510, 15520, 15629, 15721, 16223, 16260, 16295, 16519                               |
| K38416 | Tib_3 | Lhasa | M9a1a1c1b1a  | 73, 263, 310, 489, 711, 750, 1041, 1438, 2706, 3106N, 3394, 4491, 4769, 5899+XC, 7028, 7142, 7697, 8701, 8860, 9242, 9540, 10398, 10400, 10873, 11719, 12705, 14308, 14417, 14766, 14783, 15043, 15301, 15326, 16223, 16234, 16316, 16362                                                                                       |
| K38160 | Tib_3 | Lhasa | M9a1a1c1b1a  | 73, 263, 309+C, 315+C, 489, 711, 750, 1041, 1438, 2706, 3106N, 3394, 4491, 4769, 5894C, 7028, 7142, 7697, 8701, 8860, 9242, 9540, 9632, 10398, 10400, 10873, 11719, 12705, 14308, 14417, 14766, 14783, 15043, 15301, 15326, 16223, 16234, 16316, 16356, 16362                                                                   |
| K38456 | Tib_3 | Lhasa | M9a1a1c1b1a2 | 73, 146, 263, 297, 309+C, 315+C, 489, 711, 750, 1041, 1438, 2625, 2706, 3106N, 3394, 3438, 4491, 4769, 5899+XC, 6446, 7028, 7142, 7697, 8701, 8860, 9242, 9540, 10398, 10400, 10873, 11719, 12705, 14308, 14417, 14766, 14783, 15043, 15301, 15326, 16051, 16129, 16223, 16234, 16316, 16362                                    |
| K38067 | Tib_3 | Lhasa | M9a1b        | 73, 150, 152, 153, 195, 263, 310, 489, 523-524d, 709, 750, 1041, 1438, 2706, 3106N, 3394, 4491, 4769, 7028, 8701, 8860, 9540, 10398, 10400, 10873, 11719, 12362, 12705, 14308, 14766, 14783, 15043, 15301, 15326, 15671, 16223, 16234, 16362, 16519                                                                             |
| K38175 | Tib_3 | Lhasa | A11a1a       | 64, 73, 152, 235, 263, 309+CC, 315+C, 523-524d, 663, 750, 1005, 1438, 1736, 2706, 3106N, 4248, 4769, 4824, 5899+XC, 6755, 7028, 8794, 8843, 8860, 9650, 11719, 12705, 14766, 15326, 15773, 16223, 16290, 16293C, 16319                                                                                                          |
| K38162 | Tib_3 | Lhasa | A11a1a       | 73, 152, 235, 263, 309+C, 315+C, 523-524d, 663, 750, 1005, 1438, 1736, 2706, 3106N, 4248, 4769, 4824, 5899+XC, 6755, 7028, 8794, 8843, 8860, 9650, 10007, 11719, 12528, 12705, 14766, 15326, 16093, 16223, 16290, 16293C, 16319, 16519                                                                                          |
| K38164 | Tib_3 | Lhasa | B4b1a2       | 73, 263, 309+CCC, 315+C, 499, 750, 827, 1438, 2706, 3106N, 4769, 4820, 6023, 6216, 6413, 7028, 8266, 8281-8289d, 8860, 11719, 13092, 13590, 14766, 15326, 15535, 16136, 16182C, 16183C, 16189, 16217, 16256, 16519                                                                                                              |
| K38099 | Tib_3 | Lhasa | C4a2c3       | 73, 249d, 263, 309+C, 315+C, 489, 750, 1438, 1628, 2232+A, 2706, 3106N, 3394, 3552A, 4715, 4769, 6026, 7028, 7196A, 8584, 8701, 8860, 9540, 9545, 9843, 10398, 10400, 10427, 10873, 11719, 11914, 11969, 12672, 12705, 13263, 13967, 14318, 14766, 14783, 15043, 15204, 15301, 15326, 15487T, 16223, 16298, 16327, 16357, 16519 |
| K38138 | Tib_3 | Lhasa | F1d1a2a1     | 73, 146, 234, 249d, 263, 309+CC, 315+C, 523-524d, 750, 1438, 1734, 1888, 2706, 3106N, 3970, 4769, 5628, 6392, 6962, 7028, 7738, 8167, 8860, 10310, 10609, 11719, 12372, 12406, 12882, 13135, 13928C, 14766, 15326, 15402, 16145, 16188+CC, 16255, 16284, 16304, 16519                                                           |
| K38161 | Tib_3 | Lhasa | G1c          | 73, 263, 310, 489, 593, 709, 750, 1438, 1719, 2706, 3106N, 4353, 4769, 4833, 5108, 7028, 8200, 8701, 8860, 9540, 9682, 9824, 9966, 10398, 10400, 10873, 11008, 11719, 12361, 12705, 14569, 14766, 14783, 15043, 15301, 15323, 15326, 15497, 16223, 16293, 16362, 16519                                                          |

|        |       |       |              |                                                                                                                                                                                                                                                                                                                                                                    |
|--------|-------|-------|--------------|--------------------------------------------------------------------------------------------------------------------------------------------------------------------------------------------------------------------------------------------------------------------------------------------------------------------------------------------------------------------|
| K38142 | Tib_3 | Lhasa | M9a1b        | 73, 150, 152, 263, 310, 489, 750, 1041, 1438, 2706, 3106N, 3394, 4491, 4769, 7028, 8701, 8860, 9478, 9540, 10398, 10400, 10873, 11719, 12362, 12705, 14308, 14766, 14783, 15043, 15301, 15326, 15671, 16223, 16234, 16362, 16519                                                                                                                                   |
| K38140 | Tib_3 | Lhasa | B4d4         | 73, 150, 263, 309+CC, 315+C, 750, 827, 1438, 2706, 2755, 3106N, 4769, 5372, 6324C, 7028, 8281-8289d, 8860, 11719, 11914, 13942, 14766, 15326, 15535, 15930, 16183C, 16189, 16193+CC, 16234, 16519                                                                                                                                                                  |
| K38207 | Tib_3 | Lhasa | D4j1         | 73, 146, 263, 309+C, 315+C, 489, 750, 1438, 2706, 3010, 3106N, 4769, 4883, 5178A, 5262, 7028, 8414, 8701, 8860, 9540, 10398, 10400, 10873, 11696, 11719, 12705, 14668, 14766, 14783, 15043, 15301, 15326, 16223, 16362, 16526                                                                                                                                      |
| K38304 | Tib_3 | Lhasa | D4j3b        | 73, 263, 309+C, 315+C, 338, 489, 750, 1438, 2706, 3010, 3106N, 4769, 4883, 5178A, 7028, 8414, 8701, 8860, 9540, 10398, 10400, 10873, 11696, 11719, 12705, 14668, 14766, 14783, 14851, 15043, 15301, 15326, 16184, 16223, 16311, 16362, 16519                                                                                                                       |
| K38261 | Tib_3 | Lhasa | F1c1a1a      | 73, 152, 249d, 263, 309+CC, 315+C, 523-524d, 573+XC, 709, 750, 1438, 2706, 3106N, 3970, 4769, 6340, 6392, 6599, 6962, 7028, 7702, 7775, 8860, 9053, 9647, 10310, 10398, 10454, 10609, 11719, 12406, 12882, 13759, 13928C, 14766, 15326, 16111, 16129, 16188+CC, 16266, 16304, 16519                                                                                |
| K38301 | Tib_3 | Lhasa | M13a1b       | 73, 152, 263, 310, 489, 750, 1438, 1709, 2706, 3106N, 3644, 4769, 5773, 6023, 6253, 6620, 7028, 7711, 8701, 8860, 9540, 10398, 10400, 10411, 10790, 10873, 11719, 12705, 13135, 14766, 14783, 15043, 15301, 15326, 15924, 16145, 16148, 16188, 16189, 16223, 16381                                                                                                 |
| K38228 | Tib_3 | Lhasa | M13a2a1a     | 73, 152, 263, 309+C, 315+C, 489, 513, 750, 1438, 2706, 2786, 3106N, 3644, 4769, 5773, 6023, 6253, 6620, 7028, 8405, 8701, 8860, 9540, 10373, 10398, 10400, 10411, 10790, 10873, 11719, 12705, 13395, 14766, 14783, 15043, 15301, 15326, 15924, 15944d, 16145, 16168, 16223, 16257, 16311, 16519                                                                    |
| K38247 | Tib_3 | Lhasa | M9a1a1c1b1a  | 73, 263, 309+CC, 315+C, 489, 711, 750, 1041, 1438, 2706, 3106N, 3394, 4491, 4769, 5899+XC, 7028, 7142, 7697, 8701, 8860, 9242, 9540, 10398, 10400, 10873, 11719, 12705, 14308, 14417, 14766, 14783, 15043, 15301, 15326, 16223, 16234, 16316, 16362                                                                                                                |
| K38317 | Tib_3 | Lhasa | M13a2        | 73, 152, 204, 263, 309+C, 315+C, 489, 513, 750, 1438, 2706, 2786, 3106N, 3644, 4769, 5773, 6023, 6253, 6620, 7028, 8405, 8701, 8860, 9540, 10373, 10398, 10400, 10411, 10790, 10873, 11719, 12705, 13395, 14766, 14783, 15043, 15301, 15326, 15924, 15944d, 16145, 16168, 16188, 16223, 16257, 16311, 16519                                                        |
| K38455 | Tib_3 | Lhasa | M9a1a1c1b1a  | 73, 263, 309+C, 315+C, 489, 711, 750, 1041, 1438, 2706, 3106N, 3394, 4491, 4769, 5899+XC, 7028, 7142, 7697, 8701, 8860, 9242, 9540, 10398, 10400, 10873, 11719, 12705, 14308, 14417, 14766, 14783, 15043, 15301, 15326, 16223, 16234, 16316, 16362                                                                                                                 |
| K38123 | Tib_3 | Lhasa | M9a1a1c1b1a  | 73, 263, 309+C, 315+C, 489, 711, 750, 1041, 1438, 2706, 3106N, 3221, 3394, 4491, 4769, 5492, 5582, 5899+XC, 7028, 7142, 7697, 8701, 8860, 9242, 9540, 10398, 10400, 10873, 11719, 12705, 14308, 14417, 14766, 14783, 15043, 15301, 15326, 16223, 16234, 16316, 16362                                                                                               |
| K38260 | Tib_3 | Lhasa | D4           | 73, 263, 309+C, 315+C, 489, 750, 1438, 2706, 2789A, 3010, 3106N, 3253, 4769, 4883, 5178A, 7028, 8414, 8701, 8860, 9540, 9725, 10398, 10400, 10873, 11719, 11746, 12432, 12705, 14668, 14766, 14783, 15043, 15301, 15326, 16093, 16188+CC, 16223, 16362                                                                                                             |
| K38027 | Tib_3 | Lhasa | M9a1a1c1b1a3 | 73, 263, 309+C, 315+C, 489, 711, 750, 1041, 1438, 2706, 3106N, 3394, 4491, 4769, 7028, 7142, 7697, 8701, 8860, 9242, 9540, 10398, 10400, 10873, 11719, 12705, 13419, 14308, 14417, 14766, 14783, 15043, 15301, 15326, 16223, 16234, 16316, 16362                                                                                                                   |
| K38286 | Tib_3 | Lhasa | C4a1a1a3     | 73, 249d, 263, 310, 489, 523-524d, 750, , 1438, 1715, 2232+AA, 2706, 3106N, 3552A, 3576, 4715, 4769, 4884, 4958, 5484, 6026, 7028, 7196A, 7999, 8508, 8584, 8701, 8860, 9540, 9545, 10398, 10400, 10873, 11719, 11914, 11969, 12672, 12705, 13263, 14318, 14766, 14783, 15043, 15204, 15301, 15326, 15487T, 15968, 16129, 16223, 16224, 16298, 16327, 16519        |
| K38202 | Tib_3 | Lhasa | C4a1a1a2     | 73, 234, 249d, 263, 310, 489, 750, 1438, 1715, 2232+AA, 2706, 3106N, 3552A, 3576, 4715, 4769, 4884, 4958, 5918, 6026, 7028, 7196A, 7999, 8405, 8508, 8584, 8701, 8860, 9540, 9545, 10398, 10400, 10873, 11719, 11914, 11969, 12672, 12705, 13263, 14318, 14766, 14783, 15043, 15204, 15301, 15326, 15487T, 15968, 16092, 16093, 16129, 16223, 16298, 16327, 16519  |
| K38288 | Tib_3 | Lhasa | F1d1a2       | 73, 146, 249d, 263, 309+CCC, 315+C, 523-524d, 750, 1438, 1734, 2706, 3106N, 3970, 4769, 5628, 6392, 6962, 7028, 7738, 8860, 10310, 10609, 11719, 12406, 12882, 13135, 13928C, 14766, 15326, 15402, 16129, 16145, 16183C, 16189, 16284, 16304, 16519                                                                                                                |
| K38153 | Tib_3 | Lhasa | G2a1h1       | 73, 146, 263, 283, 309+C, 315+C, 489, 709, 750, 1438, 2706, 3106N, 4158, 4769, 4833, 5108, 5601, 7028, 7600, 8701, 8860, 9377, 9540, 9575, 10398, 10400, 10873, 11719, 12705, 13194, 13563, 14200, 14569, 14766, 14783, 15043, 15301, 15326, 15773, 16080, 16223, 16227, 16278, 16362                                                                              |
| K38186 | Tib_3 | Lhasa | M9a1a1c1b1a  | 73, 263, 309+C, 315+C, 489, 711, 750, 1041, 1438, 2706, 3106N, 3394, 4491, 4769, 5899+XC, 5978, 7028, 7142, 7697, 8701, 8860, 9242, 9540, 10398, 10400, 10873, 11719, 12705, 14308, 14417, 14766, 14783, 15043, 15301, 15326, 16223, 16234, 16316, 16362                                                                                                           |
| K38449 | Tib_3 | Lhasa | C4a2         | 47, 73, 249d, 263, 309+C, 315+C, 489, 523-524d, 750, 1438, 2232+A, 2706, 3106N, 3552A, 4715, 4769, 6026, 6710, 7028, 7196A, 8584, 8654, 8701, 8802, 8860, 9540, 9545, 10398, 10400, 10873, 11719, 11914, 11969, 12131, 12672, 12705, 13263, 14318, 14766, 14783, 15043, 15204, 15301, 15326, 15487T, 16093, 16126, 16223, 16269, 16298, 16327, 16354, 16357, 16519 |

|        |       |          |             |                                                                                                                                                                                                                                                                                                                  |
|--------|-------|----------|-------------|------------------------------------------------------------------------------------------------------------------------------------------------------------------------------------------------------------------------------------------------------------------------------------------------------------------|
| K38201 | Tib_3 | Lhasa    | D4j3b       | 73, 263, 310, 338, 489, 750, 1438, 2706, 3010, 3106N, 4769, 4883, 5178A, 7028, 8414, 8496-8501d, 8581, 8701, 8860, 9540, 10398, 10400, 10873, 11696, 11719, 12705, 14668, 14766, 14783, 15043, 15301, 15326, 16184, 16223, 16311, 16362                                                                          |
| K38408 | Tib_3 | Lhasa    | F1c1a1a     | 73, 152, 249d, 263, 309+C, 315+C, 523-524d, 573+XC, 709, 750, 1438, 2706, 3106N, 3970, 4769, 6392, 6599, 6962, 7028, 8860, 9053, 9647, 10310, 10454, 10609, 11719, 12406, 12501, 12882, 13759, 13928C, 14766, 14830, 15326, 16111, 16129, 16266, 16304, 16519                                                    |
| K38446 | Tib_3 | Lhasa    | F1g         | 73, 249d, 263, 309+CC, 315+C, 523-524d, 750, 1438, 2389, 2706, 3106N, 3398, 3630, 3970, 4769, 6392, 6962, 7028, 8860, 10310, 10609, 11719, 12406, 12882, 13840, 13928C, 14766, 15326, 16182C, 16183C, 16189, 16304, 16519                                                                                        |
| K38204 | Tib_3 | Lhasa    | F1g         | 73, 249d, 263, 309+CC, 315+C, 523-524d, 750, 1438, 2389, 2706, 3106N, 3398, 3970, 4769, 6260, 6392, 6962, 7028, 8860, 10310, 10609, 11719, 12406, 12882, 13928C, 14766, 15326, 16183C, 16189, 16304, 16519                                                                                                       |
| K38314 | Tib_3 | Lhasa    | G3b3a       | 73, 152, 189, 263, 310, 489, 524+AC, 709, 750, 1438, 2706, 3106N, 3394, 4769, 4833, 5108, 7028, 8701, 8860, 9540, 10398, 10400, 10873, 10972, 11719, 12705, 13477, 14569, 14605, 14766, 14783, 15043, 15301, 15326, 15927, 16209, 16223, 16274, 16362                                                            |
| K38146 | Tib_3 | Lhasa    | G3b1a1      | 73, 195, 263, 309+C, 315+C, 489, 523-524d, 709, 750, 1438, 2706, 3106N, 4769, 4833, 5108, 7028, 8701, 8860, 9540, 9599, 10398, 10400, 10511, 10873, 11719, 12616, 12705, 13477, 14569, 14605, 14766, 14783, 15043, 15301, 15326, 15927, 16223, 16249, 16274, 16362                                               |
| K38460 | Tib_3 | Lhasa    | M13a1b      | 73, 152, 263, 310, 489, 750, 1438, 2706, 3106N, 3644, 4769, 5773, 6023, 6253, 6599, 6620, 7028, 8701, 8860, 9540, 10398, 10400, 10411, 10790, 10873, 11719, 12705, 13135, 14766, 14783, 15043, 15301, 15326, 15924, 16145, 16148, 16188, 16189, 16223, 16381                                                     |
| K38442 | Tib_3 | Lhasa    | M13a1b      | 73, 152, 263, 310, 489, 750, 1438, 1709, 2706, 3106N, 3644, 4769, 5773, 6023, 6253, 6620, 7028, 7711, 8701, 8860, 9540, 10398, 10400, 10411, 10790, 10873, 11719, 12705, 13135, 14766, 14783, 15043, 15301, 15326, 15924, 16145, 16148, 16188, 16189, 16223, 16381                                               |
| K38300 | Tib_3 | Lhasa    | M13a1b      | 73, 152, 263, 310, 489, 750, 1438, 1709, 2706, 3106N, 3644, 4769, 5773, 6023, 6253, 6620, 7028, 7711, 8701, 8860, 9540, 10398, 10400, 10411, 10790, 10873, 11719, 12705, 13135, 14766, 14783, 15043, 15301, 15326, 15924, 16145, 16148, 16188, 16189, 16223, 16381                                               |
| K38440 | Tib_3 | Lhasa    | M62b1a1b    | 73, 150, 203, 204, 263, 309+C, 315+C, 489, 750, 1438, 2706, 2735, 3106N, 3511, 4561, 4769, 7028, 7664, 7844, 8149, 8281-8289d, 8701, 8860, 9540, 10398, 10400, 10873, 10978, 11431, 11719, 12705, 13708, 14766, 14783, 15043, 15301, 15326, 15510, 15520, 15629, 15721, 16092, 16169, 16223, 16260, 16295, 16519 |
| K38346 | Tib_3 | Lhasa    | M8a         | 73, 263, 310, 489, 750, 1438, 2706, 3106N, 4314d, 4715, 4769, 6179, 7028, 7196A, 7861TC, 8453, 8584, 8684, 8701, 8860, 9540, 10398, 10400, 10873, 11719, 12705, 14470, 14766, 14783, 15043, 15047, 15301, 15326, 15487T, 15697, 16223, 16298, 16319                                                              |
| K38439 | Tib_3 | Lhasa    | M9a1a1c1b1a | 73, 263, 309+CC, 315+C, 489, 711, 750, 1041, 1438, 2706, 3106N, 3394, 4491, 4769, 5471, 5899+XC, 7028, 7142, 7697, 8701, 8860, 9242, 9540, 10398, 10400, 10873, 11719, 12705, 14308, 14417, 14766, 14783, 15043, 15301, 15326, 16223, 16234, 16292, 16305, 16316, 16362, 16519                                   |
| K38253 | Tib_3 | Lhasa    | M9a1b1c     | 73, 150, 152, 153, 263, 310, 489, 750, 1041, 1438, 2706, 3106N, 3394, 4491, 4769, 7028, 8701, 8860, 9540, 10398, 10400, 10454, 10873, 11719, 12362, 12705, 14308, 14766, 14783, 15043, 15301, 15326, 15671, 16223, 16234, 16256, 16288, 16362, 16519                                                             |
| K38454 | Tib_3 | Lhasa    | G3a1a1      | 16T, 73, 143, 150, 263, 309+C, 315+C, 489, 709, 750, 1438, 2706, 3106N, 4674, 4769, 4833, 5108, 7028, 8701, 8860, 8861, 9540, 10398, 10400, 10873, 11719, 11914, 12705, 14569, 14766, 14783, 15043, 15301, 15326, 15746, 16215, 16223, 16274                                                                     |
| K38820 | Tib_4 | Nyingchi | A           | 73, 152, 235, 263, 309+C, 315+C, 523-524d, 663, 750, 1438, 1736, 2706, 3106N, 3644, 4248, 4769, 4824, 7028, 7331A, 8794, 8860, 9063, 10275, 11719, 12705, 14766, 15326, 16223, 16271, 16274, 16290, 16319, 16362, 16527                                                                                          |
| K38108 | Tib_4 | Nyingchi | G3b3a       | 73, 152, 189, 263, 310, 489, 524+ACAC, 709, 750, 1438, 2706, 3106N, 3394, 4769, 4833, 5108, 7028, 8701, 8860, 9540, 10398, 10400, 10873, 11719, 12705, 13477, 14569, 14605, 14766, 14783, 15043, 15301, 15326, 15927, 16209, 16223, 16274, 16362                                                                 |
| K38020 | Tib_4 | Nyingchi | M62b1b1     | 73, 150, 203, 204, 263, 309+CC, 315+C, 489, 524+ACAC, 750, 1438, 2706, 2735, 3030, 3106N, 3511, 4561, 4769, 7028, 7664, 7807, 8149, 8701, 8860, 9540, 10398, 10400, 10873, 11719, 12705, 13708, 14766, 14783, 15043, 15301, 15326, 15510, 15520, 15629, 15721, 16093, 16223, 16260, 16295, 16362, 16519          |
| K38113 | Tib_4 | Nyingchi | M9a1b1      | 73, 150, 152, 153, 263, 310, 489, 750, 1041, 1438, 2706, 3106N, 3394, 4491, 4769, 7028, 8701, 8860, 9478, 9540, 10398, 10400, 10873, 11719, 12362, 12705, 13326, 14308, 14766, 14783, 15043, 15301, 15326, 15671, 16158, 16223, 16234, 16362, 16519                                                              |
| K38771 | Tib_4 | Nyingchi | A15c2       | 73, 152, 153, 235, 310, 523-524d, 663, 750, 1438, 1736, 2706, 3106N, 4248, 4769, 4824, 6458, 7028, 8459, 8794, 8860, 9052, 11719, 12705, 13111, 14067, 14766, 15262, 15326, 16223, 16290, 16319, 16362                                                                                                           |
| K38206 | Tib_4 | Nyingchi | F1g         | 73, 249d, 263, 309+C, 315+C, 414G, 523-524d, 750, 1438, 2389, 2706, 3106N, 3398, 3970, 4769, 6392, 6962, 7028, 8860, 10310, 10609, 11719, 12406, 12882, 13928C, 14766, 15326, 16183C, 16189, 16304, 16519                                                                                                        |

|        |       |          |             |                                                                                                                                                                                                                                                                                                                                                                       |
|--------|-------|----------|-------------|-----------------------------------------------------------------------------------------------------------------------------------------------------------------------------------------------------------------------------------------------------------------------------------------------------------------------------------------------------------------------|
| K38174 | Tib_4 | Nyingchi | M9a1a1c1b1a | 73, 263, 309+C, 315+C, 489, 711, 750, 1041, 1438, 2706, 3106N, 3394, 4491, 4769, 5899+XC, 7028, 7142, 7697, 8701, 8860, 9242, 9540, 10398, 10400, 10873, 11719, 12705, 13098, 14308, 14417, 14766, 14783, 15043, 15301, 15326, 16092, 16223, 16234, 16316, 16362                                                                                                      |
| K38111 | Tib_4 | Nyingchi | A6          | 73, 152, 235, 263, 310, 523-524d, 654, 663, 750, 1438, 1736, 2706, 3106N, 3687, 4248, 4769, 4824, 7028, 8794, 8860, 9705, 11719, 12705, 13287, 14766, 15326, 16223, 16234, 16290, 16319, 16362                                                                                                                                                                        |
| K38110 | Tib_4 | Nyingchi | B5b4        | 73, 103, 146, 204, 263, 309+C, 315+C, 523-524d, 709, 750, 1438, 1598, 2706, 3106N, 4703, 4769, 6852, 7028, 7170, 8281-8289d, 8349, 8584, 8829, 8860, 9950, 10398, 11719, 12361, 14766, 15223, 15326, 15508, 15662, 15851, 15927, 16140, 16182C, 16183C, 16189, 16243, 16288, 16519                                                                                    |
| K3151  | Tib_4 | Nyingchi | M9a1a1c1b1a | 73, 263, 309+C, 315+C, 489, 711, 750, 1041, 1438, 2706, 3106N, 3394, 4077, 4491, 4769, 5899+XC, 7028, 7142, 7697, 8701, 8860, 9242, 9540, 10398, 10400, 10873, 11719, 12192, 12705, 14308, 14417, 14766, 14783, 15043, 15301, 15326, 16223, 16234, 16316, 16362                                                                                                       |
| K36966 | Tib_4 | Nyingchi | C7          | 73, 195, 249d, 263, 310, 489, 523-524d, 750, 1438, 1719, 2706, 3106N, 3552A, 4715, 4769, 5821, 6338, 7028, 7196A, 7424, 8584, 8701, 8860, 9540, 9545, 9641, 10398, 10400, 10873, 11719, 11914, 12705, 12732, 13263, 14124, 14318, 14766, 14783, 15043, 15301, 15326, 15487T, 16093, 16223, 16266, 16298, 16327, 16356, 16519                                          |
| K38546 | Tib_4 | Nyingchi | G2b1b       | 73, 263, 309+CC, 315+C, 489, 709, 750, 1438, 2706, 3106N, 4769, 4833, 4853, 5108, 5601, 5951, 7028, 8701, 8860, 8877, 9540, 10398, 10400, 10873, 11719, 12375, 12705, 13563, 14569, 14766, 14783, 15043, 15301, 15326, 16223, 16362                                                                                                                                   |
| K38640 | Tib_4 | Nyingchi | G3b1a       | 73, 195, 263, 309+C, 315+C, 489, 523-524d, 709, 750, 1438, 2706, 3106N, 4769, 4833, 5108, 7028, 8065, 8701, 8860, 9540, 9599, 10398, 10400, 10873, 11719, 12705, 13477, 14569, 14605, 14766, 14783, 15043, 15301, 15326, 15927, 16223, 16249, 16274, 16362                                                                                                            |
| K38428 | Tib_4 | Nyingchi | A8a         | 64, 73, 146, 151, 235, 263, 309+CC, 315+C, 523-524d, 663, 750, 1438, 1736, 2706, 3106N, 3144, 4248, 4508, 4769, 4824, 5046, 7028, 7711, 8794, 8860, 9300, 9531, 11719, 12705, 14766, 15326, 15758, 16223, 16264, 16290, 16319                                                                                                                                         |
| K38967 | Tib_4 | Nyingchi | C7a         | 73, 249d, 263, 309+CC, 315+C, 489, 523-524d, 750, 1438, 2706, 3106N, 3552A, 4715, 4742, 4769, 5821, 6338, 7028, 7196A, 7853, 8584, 8701, 8860, 9073, 9540, 9545, 10398, 10400, 10873, 11719, 11914, 12705, 13263, 14318, 14766, 14783, 15043, 15301, 15326, 15487T, 16223, 16298, 16327                                                                               |
| K38821 | Tib_4 | Nyingchi | D4h1c2a1    | 73, 151, 152, 263, 310, 489, 709, 750, 1438, 2706, 3010, 3106N, 3336, 3644, 4182, 4679, 4769, 4883, 5048, 5178A, 7028, 7181, 7673, 8179, 8414, 8701, 8860, 9540, 10398, 10400, 10873, 11719, 12477, 12705, 13914A, 14178, 14668, 14766, 14783, 15043, 15301, 15326, 16174, 16223, 16311, 16319, 16362, 16519                                                          |
| K38120 | Tib_4 | Nyingchi | F1d1a1      | 73, 146, 249d, 263, 309+C, 315+C, 523-524d, 750, 1438, 1734, 2706, 2833, 3106N, 3970, 4769, 5628, 6392, 6962, 7028, 7738, 8860, 10310, 10609, 11719, 12406, 12882, 13135, 13928C, 14766, 15326, 15402, 16145, 16284, 16304, 16474C, 16519                                                                                                                             |
| K38040 | Tib_4 | Nyingchi | M12a1b      | 73, 125G, 127, 128, 146, 195, 263, 309+CC, 315+C, 489, 750, 979, 1438, 2706, 3106N, 3621, 4170, 4562, 4769, 5492, 5580, 6446, 7028, 8701, 8860, 9540, 9755, 10398, 10400, 10873, 11016, 11025, 11353, 11719, 12030, 12358, 12372, 12616, 12705, 14569, 14727, 14766, 14783, 15010, 15043, 15301, 15326, 15424, 15894, 16148, 16172, 16223, 16234, 16261, 16290, 16519 |
| K38427 | Tib_4 | Nyingchi | M7c1a1a1    | 64, 73, 146, 199, 263, 310, 489, 523-524d, 750, 1438, 2706, 3106N, 3882, 4071, 4769, 4850, 5442, 6455, 7028, 8701, 8860, 9266, 9540, 9824, 10398, 10400, 10873, 11665, 11719, 12091, 12372, 12705, 12810, 13759, 13942, 14766, 14783, 15043, 15301, 15326, 16134, 16169, 16223, 16295, 16519                                                                          |
| K36969 | Tib_4 | Nyingchi | A17         | 73, 152, 234, 235, 263, 310, 523-524d, 663, 750, 1438, 1736, 2706, 3106N, 4113, 4248, 4769, 4824, 5514, 7028, 7805, 8794, 8860, 9126, 11252, 11719, 12408, 12705, 14766, 15217, 15326, 16223, 16235, 16274, 16290, 16299, 16311, 16319, 16362, 16519                                                                                                                  |
| K38096 | Tib_4 | Nyingchi | B4a4        | 73, 189, 193, 263, 309+CC, 315+C, 523-524d, 709, 750, 1438, 2706, 3106N, 4769, 5465, 5498, 7028, 8281-8289d, 8860, 9123, 11719, 13834, 14751, 14766, 15326, 16182C, 16183C, 16189, 16217, 16299, 16357, 16390, 16519                                                                                                                                                  |
| K38483 | Tib_4 | Nyingchi | C4d2        | 73, 152, 195, 249d, 263, 310, 489, 750, 1438, 2706, 3106N, 3552A, 4715, 4769, 6026, 7028, 7100, 7196A, 8584, 8701, 8860, 9540, 9545, 10398, 10400, 10873, 11719, 11914, 11969, 12705, 12780, 13263, 14318, 14766, 14783, 15043, 15204, 15236, 15301, 15326, 15487T, 16093, 16298, 16327, 16519                                                                        |
| K38093 | Tib_4 | Nyingchi | G2a1        | 73, 263, 309+CC, 315+C, 489, 709, 750, 1438, 2706, 3106N, 4769, 4833, 5108, 5601, 7028, 7298, 7600, 8701, 8860, 9377, 9540, 9575, 10398, 10400, 10873, 11719, 12705, 13563, 14200, 14569, 14766, 14783, 15043, 15301, 15326, 16223, 16227, 16278, 16362                                                                                                               |
| K38011 | Tib_4 | Nyingchi | M9a1b1c     | 73, 150, 152, 153, 263, 310, 489, 750, 1041, 1438, 2706, 3106N, 3394, 4491, 4769, 7028, 8701, 8860, 9540, 10398, 10400, 10454, 10873, 11719, 12362, 12705, 14308, 14766, 14783, 15043, 15301, 15326, 15671, 16158, 16223, 16234, 16355, 16362, 16519                                                                                                                  |
| K38378 | Tib_4 | Nyingchi | A11a1a      | 73, 152, 235, 263, 309+C, 315+C, 523-524d, 663, 750, 1005, 1438, 1736, 2706, 3106N, 3918, 4248, 4769, 4824, 5768, 5899+XC, 6755, 7028, 8794, 8843, 8860, 9650, 11719, 12705, 14766, 15326, 16223, 16290, 16293C, 16319                                                                                                                                                |

|        |       |          |          |                                                                                                                                                                                                                                                                                                                                                                  |
|--------|-------|----------|----------|------------------------------------------------------------------------------------------------------------------------------------------------------------------------------------------------------------------------------------------------------------------------------------------------------------------------------------------------------------------|
| K38395 | Tib_4 | Nyingchi | A14b1    | 73, 151, 152, 200, 235, 263, 310, 523-524d, 663, 735, 750, 1438, 1598, 1736, 2706, 3106N, 4248, 4769, 4824, 7028, 7805, 8794, 8860, 11719, 11914, 12705, 14766, 15326, 16223, 16290, 16319, 16362                                                                                                                                                                |
| K38225 | Tib_4 | Nyingchi | A21a     | 73, 152, 235, 263, 310, 663, 750, 1438, 1736, 2706, 3106N, 4248, 4769, 4824, 7028, 8794, 8860, 11719, 12705, 14364, 14766, 15326, 16092, 16223, 16290, 16319, 16362                                                                                                                                                                                              |
| K38268 | Tib_4 | Nyingchi | F1c1a1a  | 73, 152, 249d, 263, 309+C, 315+C, 523-524d, 573+XC, 709, 750, 1438, 2706, 3106N, 3970, 4769, 6392, 6599, 6962, 7028, 8860, 9053, 9647, 10310, 10454, 10609, 11719, 12406, 12882, 13759, 13928C, 14110, 14766, 15326, 16111, 16129, 16266, 16304, 16519                                                                                                           |
| K38396 | Tib_4 | Nyingchi | G2b1b2a  | 73, 263, 309+C, 315+C, 489, 523-524d, 709, 750, 1438, 2706, 3106N, 3975, 4769, 4833, 4853, 5108, 5601, 7028, 8701, 8860, 8877, 9540, 10398, 10400, 10873, 11719, 12375, 12705, 12795, 13563, 14209, 14563G, 14569, 14766, 14783, 15043, 15301, 15326, 16223, 16324, 16362                                                                                        |
| K38333 | Tib_4 | Nyingchi | G3b3     | 73, 152, 263, 310, 489, 709, 750, 1438, 2706, 3106N, 3394, 4769, 4833, 5108, 7028, 8701, 8860, 9540, 10398, 10400, 10873, 11620, 11719, 11908, 12705, 13477, 14564, 14569, 14605, 14766, 14783, 15043, 15301, 15326, 15927, 16209, 16223, 16274, 16362                                                                                                           |
| K38388 | Tib_4 | Nyingchi | G3b1a1   | 73, 195, 263, 309+C, 315+C, 489, 523-524d, 709, 750, 1438, 2706, 3106N, 4769, 4833, 5108, 7028, 8701, 8860, 9540, 9599, 10398, 10400, 10511, 10873, 11719, 12616, 12705, 13477, 14569, 14605, 14766, 14783, 15043, 15301, 15326, 15927, 16223, 16249, 16274, 16362                                                                                               |
| K38397 | Tib_4 | Nyingchi | M5a      | 73, 263, 310, 489, 709, 750, 1438, 1888, 2706, 3106N, 3921, 4769, 7028, 8701, 8860, 9540, 9773, 9947, 10398, 10400, 10790, 10873, 11719, 12477, 12705, 12727, 13708, 14323, 14766, 14783, 15043, 15301, 15326, 15927, 16129, 16183C, 16189, 16193+C, 16209, 16223, 16362, 16519                                                                                  |
| K38400 | Tib_4 | Nyingchi | M9a1b1e  | 73, 150, 152, 153, 263, 309+CC, 315+C, 489, 709, 750, 1041, 1438, 2706, 3106N, 3394, 4491, 4769, 7028, 8701, 8860, 9540, 10398, 10400, 10873, 11719, 12362, 12705, 14308, 14766, 14783, 15043, 15301, 15326, 15671, 16158, 16223, 16234, 16343, 16356, 16362, 16519                                                                                              |
| K38221 | Tib_4 | Nyingchi | A14b1    | 73, 152, 200, 235, 263, 310, 523-524d, 663, 735, 750, 1438, 1598, 1736, 2706, 3106N, 4248, 4769, 4824, 7028, 7705, 7805, 8794, 8860, 11719, 12705, 14766, 15326, 16223, 16290, 16319, 16362                                                                                                                                                                      |
| K37573 | Tib_4 | Nyingchi | B5a1c2   | 73, 146, 210, 263, 310, 523-524d, 709, 750, 1438, 2706, 3106N, 3537, 4562, 4769, 6960, 7028, 8281-8289d, 8584, 8860, 9950, 10325, 10398, 11719, 14766, 15235, 15326, 15514, 16086, 16111, 16140, 16183C, 16189, 16193+CC, 16266A, 16465, 16519                                                                                                                   |
| K38628 | Tib_4 | Nyingchi | F1b1c    | 73, 152, 249d, 263, 309+CC, 315+C, 523-524d, 750, 1438, 2706, 3106N, 3970, 4732, 4769, 5147, 5508, 6392, 6962, 7028, 8860, 8955, 9932, 10235, 10310, 10609, 10976, 11719, 12406, 12882, 13928C, 14476, 14766, 15119, 15326, 16182C, 16183C, 16189, 16209, 16232A, 16249, 16304, 16519                                                                            |
| K38877 | Tib_4 | Nyingchi | A11a1a4  | 73, 152, 235, 263, 309+CC, 315+C, 523-524d, 663, 750, 1005, 1438, 1736, 2706, 3106N, 4248, 4769, 4824, 5899+XC, 6755, 7028, 8794, 8843, 8860, 9055, 9650, 11719, 12705, 14766, 15326, 16223, 16290, 16293C, 16319                                                                                                                                                |
| K38358 | Tib_4 | Nyingchi | A11a1a   | 73, 152, 235, 263, 309+C, 315+C, 523-524d, 663, 750, 1005, 1438, 1736, 1810, 2706, 3106N, 4248, 4316, 4769, 4824, 5899+XC, 6755, 7028, 8794, 8843, 8860, 9650, 11719, 12705, 14766, 15326, 16223, 16290, 16293C, 16319                                                                                                                                           |
| K38405 | Tib_4 | Nyingchi | A17      | 73, 152, 234, 235, 263, 310, 523-524d, 663, 750, 1438, 1736, 2706, 3106N, 4113, 4248, 4769, 4824, 5514, 7028, 7805, 8794, 8860, 9126, 11252, 11719, 12408, 12705, 14766, 15217, 15326, 16223, 16235, 16274, 16290, 16299, 16311, 16319, 16362, 16519                                                                                                             |
| K38973 | Tib_4 | Nyingchi | C4a1a1a1 | 73, 249d, 263, 310, 489, 523-524d, 750, 1438, 1715, 2232+AA, 2706, 3106N, 3327, 3552A, 3576, 4715, 4769, 4884, 4958, 6026, 7028, 7196A, 7999, 8508, 8584, 8701, 8860, 9540, 9545, 10398, 10400, 10873, 11719, 11914, 11969, 12672, 12705, 13263, 14318, 14766, 14783, 15043, 15204, 15301, 15326, 15487T, 15968, 16093, 16129, 16223, 16224, 16298, 16327, 16519 |
| K38878 | Tib_4 | Nyingchi | C4a2c1   | 47, 73, 207, 249d, 263, 309+C, 315+C, 489, 750, 1438, 2232+A, 2706, 3106N, 3394, 3552A, 4715, 4769, 6026, 6929, 7028, 7196A, 8584, 8701, 8860, 9540, 9545, 10398, 10400, 10873, 11719, 11914, 11969, 12672, 12705, 13263, 13967, 14318, 14766, 14783, 15043, 15204, 15301, 15326, 15487T, 16223, 16239, 16327, 16357, 16519                                      |
| K38873 | Tib_4 | Nyingchi | C4d2     | 73, 152, 249d, 263, 309+C, 315+C, 489, 750, 1438, 2706, 3106N, 3552A, 4715, 4769, 6026, 7028, 7100, 7196A, 8584, 8701, 8860, 9540, 9545, 10398, 10400, 10873, 11719, 11914, 11969, 12705, 12780, 13263, 14318, 14766, 14783, 15043, 15204, 15236, 15301, 15326, 15487T, 16093, 16298, 16327, 16519                                                               |
| K38786 | Tib_4 | Nyingchi | D4b2b    | 73, 263, 310, 489, 523-524d, 750, 1382C, 1438, 2706, 3010, 3106N, 4769, 4883, 5178A, 6701, 7028, 8020, 8414, 8701, 8860, 8964, 9296, 9540, 9824A, 10398, 10400, 10873, 11719, 12705, 14002, 14668, 14766, 14783, 15043, 15301, 15326, 16223, 16362, 16519                                                                                                        |
| K38743 | Tib_4 | Nyingchi | D4b2b9   | 73, 194, 263, 310, 489, 523-524d, 750, 1382C, 1438, 2706, 3010, 3106N, 4769, 4883, 5178A, 7028, 8020, 8414, 8545, 8701, 8860, 8964, 9296, 9540, 9824A, 10398, 10400, 10873, 11719, 12705, 14668, 14751, 14766, 14783, 15043, 15301, 15326, 16111, 16223, 16362, 16519                                                                                            |

|        |       |          |               |                                                                                                                                                                                                                                                                                                                                                   |
|--------|-------|----------|---------------|---------------------------------------------------------------------------------------------------------------------------------------------------------------------------------------------------------------------------------------------------------------------------------------------------------------------------------------------------|
| K38892 | Tib_4 | Nyingchi | D4g2a1c1      | 73, 263, 298, 310, 489, 750, 827, 1438, 2706, 3010, 3106N, 4394, 4769, 4883, 5178A, 5231, 7028, 8414, 8701, 8860, 9540, 10398, 10400, 10873, 11059, 11719, 12231, 12705, 12966A, 13104, 14668, 14766, 14783, 15043, 15301, 15326, 16223, 16240, 16264, 16274, 16362, 16519                                                                        |
| K38484 | Tib_4 | Nyingchi | D4h1c2a1      | 73, 151, 152, 263, 309+C, 315+C, 489, 709, 750, 1438, 2706, 3010, 3106N, 3336, 3644, 4182, 4769, 4883, 5048, 5178A, 7028, 7181, 7673, 8179, 8414, 8701, 8860, 9540, 10398, 10400, 10873, 11719, 12477, 12705, 13914A, 14178, 14668, 14766, 14783, 15043, 15301, 15326, 16174, 16223, 16311, 16319, 16362, 16519                                   |
| K38478 | Tib_4 | Nyingchi | D4h1c2a1      | 73, 151, 152, 263, 309+C, 315+C, 489, 709, 750, 1438, 2706, 3010, 3106N, 3336, 3644, 4182, 4769, 4883, 5048, 5178A, 7028, 7181, 7673, 8179, 8414, 8701, 8860, 9540, 10398, 10400, 10873, 11719, 12477, 12705, 13914A, 14178, 14668, 14766, 14783, 15043, 15301, 15326, 16174, 16223, 16311, 16319, 16362, 16519                                   |
| K38959 | Tib_4 | Nyingchi | D4j1b         | 73, 263, 310, 489, 750, 1438, 1734, 2706, 3010, 3106N, 4769, 4883, 5178A, 5262, 6286, 7028, 7055, 8194, 8414, 8701, 8860, 9540, 10253, 10398, 10400, 10873, 11696, 11719, 12705, 12993, 14668, 14766, 14783, 15043, 15301, 15326, 16223, 16362                                                                                                    |
| K38876 | Tib_4 | Nyingchi | D4j3b         | 73, 263, 309+C, 315+C, 338, 489, 750, 1438, 2706, 3010, 3106N, 4769, 4883, 5178A, 7028, 8414, 8701, 8860, 9540, 10398, 10400, 10873, 11696, 11719, 12164, 12705, 14668, 14766, 14783, 15043, 15301, 15326, 15519, 16184, 16223, 16260, 16311, 16362, 16519                                                                                        |
| K38208 | Tib_4 | Nyingchi | D4j3b         | 73, 195, 263, 309+C, 315+C, 338, 489, 750, 789, 1438, 2706, 3010, 3106N, 4769, 4883, 5178A, 7028, 8414, 8701, 8860, 9540, 10398, 10400, 10873, 11696, 11719, 12705, 14668, 14766, 14783, 15043, 15301, 15326, 16157, 16184, 16223, 16311, 16362                                                                                                   |
| K38675 | Tib_4 | Nyingchi | D5a2a1c       | 73, 150, 263, 310, 489, 523-524d, 750, 752, 1107, 2706, 3106N, 4769, 4883, 5178A, 5301, 7028, 8701, 8860, 9180, 9540, 10397, 10398, 10400, 10873, 11719, 11944, 12026, 12705, 14766, 14783, 15043, 15301, 15326, 16092, 16164, 16172, 16182C, 16183C, 16189, 16223, 16243, 16266, 16362                                                           |
| K38823 | Tib_4 | Nyingchi | F1a1a1        | 73, 249d, 263, 309+C, 315+C, 523-524d, 750, 1438, 2706, 3106N, 3970, 4086, 4769, 6392, 6962, 7028, 8149, 8479, 8860, 9053, 9548, 10310, 10609, 11215, 11719, 11914, 12406, 12882, 13759, 13928C, 14766, 15326, 16108, 16129, 16162, 16172, 16304, 16317, 16519                                                                                    |
| K38406 | Tib_4 | Nyingchi | F1c1a1a       | 73, 151, 152, 249d, 263, 309+CC, 315+C, 523-524d, 573+XC, 709, 750, 1438, 2706, 3106N, 3970, 4769, 6392, 6599, 6962, 7028, 8860, 9053, 9647, 10310, 10454, 10609, 11719, 12406, 12882, 13759, 13928C, 14766, 15326, 16111, 16129, 16188+CC, 16266, 16304, 16519                                                                                   |
| K38477 | Tib_4 | Nyingchi | F1d           | 73, 146, 249d, 263, 309+C, 315+C, 523-524d, 750, 1438, 1734, 2706, 3106N, 3970, 4769, 5460, 5628, 6050, 6392, 6962, 7028, 7193, 7738, 8860, 10306, 10310, 10609, 11092, 11719, 12406, 12882, 13928C, 14766, 15326, 15402, 15930, 16042GA, 16093, 16304, 16519                                                                                     |
| K38583 | Tib_4 | Nyingchi | F1g1          | 73, 249d, 263, 309+CC, 315+C, 523-524d, 750, 1438, 2389, 2706, 3106N, 3398, 3621, 3970, 4769, 6351, 6392, 6962, 7028, 8860, 9180, 10310, 10609, 11335, 11719, 12406, 12882, 13928C, 14766, 14798, 15326, 15499, 16093, 16182C, 16183C, 16189, 16304, 16519                                                                                        |
| K38748 | Tib_4 | Nyingchi | G2a'c         | 73, 151, 152, 263, 310, 489, 709, 750, 1438, 2706, 3106N, 4769, 4833, 5108, 5493, 5601, 5783, 7028, , 8701, 8860, 9230, 9540, 9575, 10398, 10400, 10873, 11084, 11719, 12705, 13542C, 13563, 14569, 14766, 14783, 15043, 15262, 15301, 15326, 16223, 16291, 16311, 16362                                                                          |
| K38349 | Tib_4 | Nyingchi | H101          | 152, 263, 309+CC, 315+C, 721, 750, 1438, 3106N, 4769, 8860, 9230, 15326, 16184                                                                                                                                                                                                                                                                    |
| K38995 | Tib_4 | Nyingchi | M13a2a1e      | 73, 152, 263, 310, 489, 513, 750, 1438, 2706, 2786, 3106N, 3644, 4769, 5773, 6023, 6253, 6620, 7028, 8405, 8701, 8860, 9540, 10373, 10398, 10400, 10411, 10790, 10873, 11719, 12705, 13395, 13981, 14766, 14783, 14824, 15043, 15301, 15326, 15924, 15944d, 16145, 16168, 16188, 16223, 16257, 16311, 16519                                       |
| K38895 | Tib_4 | Nyingchi | M9a1a1c1b1a14 | 73, 152, 263, 309+CC, 315+C, 489, 711, 750, 1041, 1438, 2706, 3106N, 3394, 4491, 4769, 5899+XC, 7028, 7142, 7697, 8701, 8860, 9242, 9540, 10398, 10400, 10873, 11719, 12705, 14308, 14417, 14766, 14783, 15043, 15301, 15326, 16223, 16234, 16316, 16362                                                                                          |
| K38860 | Tib_4 | Nyingchi | M9a1a1c1b1a   | 73, 263, 309+C, 315+C, 453, 489, 711, 750, 1041, 1438, 2706, 3106N, 3394, 4491, 4769, 5899+XC, 5911, 7028, 7142, 7697, 8701, 8860, 9242, 9540, 10398, 10400, 10873, 11719, 12705, 14308, 14417, 14766, 14783, 15043, 15301, 15326, 16223, 16234, 16316, 16362                                                                                     |
| K38721 | Tib_4 | Nyingchi | M9a1a1c1b1a   | 73, 263, 291+A, 309+CC, 315+C, 489, 711, 750, 1041, 1438, 2706, 3106N, 3394, 4491, 4769, 5899+XC, 7028, 7142, 7697, 8701, 8860, 9242, 9540, 10398, 10400, 10873, 11719, 12705, 14308, 14417, 14766, 14783, 15043, 15301, 15326, 16223, 16234, 16316, 16362                                                                                        |
| K38295 | Tib_4 | Nyingchi | M9a1a1c1b1a   | 73, 263, 309+C, 315+C, 489, 711, 750, 1041, 1438, 2706, 3106N, 3394, 4491, 4769, 5899+XC, 7028, 7142, 7697, 8701, 8860, 9242, 9540, 10205, 10398, 10400, 10873, 11719, 12705, 14308, 14417, 14766, 14783, 15043, 15301, 15326, 16223, 16234, 16241, 16316, 16362                                                                                  |
| K38437 | Tib_4 | Nyingchi | M9a1a1c1b1a   | 73, 263, 309+CC, 315+C, 489, 711, 750, 1041, 1438, 2706, 3106N, 3394, 4491, 4769, 5471, 5899+XC, 7028, 7142, 7697, 8701, 8860, 9242, 9540, 10398, 10400, 10873, 11719, 12705, 14308, 14417, 14766, 14783, 15043, 15301, 15326, 16223, 16234, 16292, 16305, 16316, 16362, 16519                                                                    |
| K39022 | Tib_4 | Nyingchi | C4a1a1a3      | 73, 179, 249d, 263, 310, 489, 523-524d, 750, 1438, 1715, 2232+AA, 2706, 3106N, 3552A, 3576, 4715, 4769, 4884, 4958, 6026, 7028, 7196A, 7999, 8508, 8584, 8701, 8860, 9540, 9545, 10398, 10400, 10873, 11719, 11914, 11969, 12672, 12705, 13263, 14318, 14766, 14783, 15043, 15204, 15301, 15326, 15487T, 15968, 16129, 16223, 16298, 16327, 16519 |

|        |       |                |              |                                                                                                                                                                                                                                                                                                                                                     |
|--------|-------|----------------|--------------|-----------------------------------------------------------------------------------------------------------------------------------------------------------------------------------------------------------------------------------------------------------------------------------------------------------------------------------------------------|
| K38720 | Tib_4 | Nyingchi       | M9a1a1c1b1a  | 73, 263, 291+A, 309+CC, 315+C, 489, 711, 750, 1041, 1438, 2706, 3106N, 3394, 4491, 4769, 5899+XC, 7028, 7142, 7697, 8701, 8860, 9242, 9540, 10398, 10400, 10873, 11719, 12705, 14308, 14417, 14766, 14783, 15043, 15301, 15326, 16223, 16234, 16316, 16362                                                                                          |
| K38643 | Tib_4 | Nyingchi       | G2b1b2a      | 73, 263, 309+C, 315+C, 489, 709, 750, 1438, 2706, 3106N, 3975, 4769, 4833, 4853, 5108, 5601, 7028, 7202, 8701, 8860, 8877, 9540, 10398, 10400, 10873, , 11719, 12375, 12705, 12795, 13563, 14563G, 14569, 14766, 14783, 15043, 15301, 15326, 16223, 16324, 16362                                                                                    |
| K38637 | Tib_4 | Nyingchi       | D5a2a1d      | 73, 150, 263, 309+C, 315+C, 489, 523-524d, 650, 750, 752, 1107, 2706, 3106N, 3402, 4083, 4769, 4883, 5178A, 5301, 5581, 7028, 8701, 8860, 9180, 9540, 10397, 10398, 10400, 10873, 11152, 11719, 11944, 12026, 12358, 12705, 13711, 13985-13987d, 14766, 14783, 15043, 15301, 15326, 16164, 16172, 16182C, 16183C, 16189, 16209, 16223, 16266, 16362 |
| K38548 | Tib_4 | Nyingchi       | F1g          | 73, 249d, 263, 309+CC, 315+C, 523-524d, 750, 1438, 2389, 2706, 3106N, 3398, 3421, 3970, 4769, 6023, 6392, 6962, 7028, 8860, 10310, 10609, 11719, 12406, 12882, 13928C, 14766, 15326, 16182C, 16183C, 16189, 16304, 16519                                                                                                                            |
| K38511 | Tib_4 | Nyingchi       | D5a2a1c      | 73, 150, 263, 310, 489, 523-524d, 750, 752, 1107, 2706, 2833, 3106N, 4769, 4883, 5178A, 5301, 7028, 8701, 8860, 9180, 9540, 10397, 10398, 10400, 10873, 11719, 11944, 12026, 12705, 14766, 14783, 15043, 15301, 15326, 16164, 16172, 16182C, 16183C, 16189, 16223, 16243, 16266, 16362                                                              |
| K38443 | Tib_4 | Nyingchi       | F1g          | 73, 249d, 263, 309+CC, 315+C, 523-524d, 750, 1438, 2389, 2706, 3106N, 3398, 3630, 3970, 4769, 6392, 6962, 7028, 8860, 10310, 10609, 11719, 12406, 12882, 13840, 13928C, 14766, 15326, 16182C, 16183C, 16189, 16304, 16519                                                                                                                           |
| K38062 | Tib_4 | Nyingchi       | D4b2b10      | 41, 73, 194, 263, 310, 489, 523-524d, 750, 1382C, 1438, 2706, 3010, 3106N, 4769, 4883, 5178A, 7028, 8020, 8065, 8291, 8414, 8701, 8784, 8860, 8964, 9296, 9540, 9824A, 10398, 10400, 10873, 11719, 12705, 14668, 14766, 14783, 15043, 15217, 15301, 15326, 16223, 16362, 16519                                                                      |
| K1998  | Tib_5 | Anduo,<br>Naqu | D4j1a1f      | 73, 263, 309+C, 315+C, 489, 523-524d, 750, 1438, 2706, 3010, 3106N, 4769, 4883, 5178A, 5262, 7028, 7581, 7783, 8414, 8701, 8860, 9053, 9540, 10398, 10400, 10873, 11696, 11719, 12130, 12358, 12705, 14668, 14766, 14783, 15043, 15295, 15301, 15326, 16086, 16223, 16362                                                                           |
| K1823  | Tib_5 | Anduo,<br>Naqu | M9a1a1c1b1a  | 73, 263, 310, 489, 711, 750, 1041, 1438, 2706, 3106N, 3394, 4491, 4769, 5899+XC, 7028, 7142, 7697, 8701, 8860, 9242, 9540, 10398, 10400, 10873, 11719, 12705, 14308, 14417, 14766, 14783, 15043, 15301, 15326, 16223, 16234, 16316, 16362                                                                                                           |
| K2007  | Tib_5 | Anduo,<br>Naqu | B4a4         | 73, 193, 263, 309+C, 315+C, 523-524d, 709, 750, 1438, 2706, 3106N, 4769, 5465, 5498, 7028, 7830, 8281-8289d, 8860, 9123, 11719, 13834, 14751, 14766, 15262, 15326, 16182C, 16183C, 16189, 16217, 16299, 16519                                                                                                                                       |
| K1816  | Tib_5 | Anduo,<br>Naqu | D4j3b        | 73, 263, 309+C, 315+C, 338, 489, 750, 1438, 2706, 3010, 3106N, 4769, 4883, 5178A, 7028, 8414, 8701, 8860, 9540, 10398, 10400, 10873, 11696, 11719, 12705, 14668, 14766, 14783, 15043, 15301, 15326, 16184, 16223, 16278, 16311, 16362                                                                                                               |
| K1808  | Tib_5 | Anduo,<br>Naqu | F1g          | 73, 249d, 263, 309+CC, 315+C, 523-524d, 750, 1438, 2389, 2706, 3106N, 3398, 3970, 4769, 6392, 6962, 7028, 8860, 10310, 10321, 10609, 11719, 12406, 12699, 12882, 12930, 13928C, 14766, 15326, 16182C, 16183C, 16189, 16304, 16519                                                                                                                   |
| K1862  | Tib_5 | Anduo,<br>Naqu | D5a2a1c      | 73, 150, 263, 272, 310, 489, 523-524d, 750, 752, 1107, 2706, 3106N, 4769, 4883, 5178A, 5301, 7028, 8573, 8701, 8860, 9180, 9540, 10397, 10398, 10400, 10873, 11719, 11944, 12026, 12705, 13203, 14766, 14783, 15043, 15301, 15326, 16092, 16164, 16172, 16182C, 16183C, 16189, 16223, 16243, 16266, 16362                                           |
| K1812  | Tib_5 | Anduo,<br>Naqu | F1g          | 73, 249d, 263, 309+CC, 315+C, 523-524d, 750, 1438, 2389, 2706, 3106N, 3398, 3970, 4769, 6392, 6962, 7028, 8860, 10310, 10321, 10609, 11719, 12406, 12699, 12882, 12930, 13928C, 14766, 15326, 16182C, 16183C, 16189, 16304, 16519                                                                                                                   |
| K1844  | Tib_5 | Anduo,<br>Naqu | M13a1b       | 73, 152, 263, 310, 489, 750, 1438, 2706, 3106N, 3644, 4769, 5773, 6023, 6253, 6620, 7028, 8392, 8701, 8860, 9540, 10398, 10400, 10411, 10790, 10873, 11719, 12705, 13135, 14766, 14783, 15043, 15301, 15326, 15924, 16145, 16148, 16188, 16189, 16223, 16381                                                                                        |
| K1864  | Tib_5 | Anduo,<br>Naqu | M9a1a1c1b1a2 | 73, 146, 263, 309+C, 315+C, 489, 711, 750, 1041, 1438, 2706, 3106N, 3394, 4491, 4769, 5899+XC, 6446, 7028, 7142, 7598, 7697, 8701, 8860, 9242, 9540, 10398, 10400, 10873, 11719, 12705, 14308, 14417, 14766, 14783, 15043, 15301, 15326, 16223, 16234, 16311, 16316, 16362                                                                          |
| K1468  | Tib_5 | Anduo,<br>Naqu | M9a1b1c      | 73, 150, 152, 153, 263, 310, 489, 709, 750, 1041, 1438, 2706, 3106N, 3394, 4491, 4769, 7028, 8701, 8860, 9000, 9540, 10398, 10400, 10454, 10873, 11719, 12362, 12705, 14308, 14766, 14783, 15043, 15301, 15326, 15671, 16158, 16223, 16234, 16288, 16362, 16519                                                                                     |
| K1859  | Tib_5 | Anduo,<br>Naqu | A            | 73, 152, 182, 235, 263, 309+CC, 315+C, 663, 750, 1438, 1736, 2706, 3106N, 4248, 4769, 4824, 7028, 8794, 8860, 11719, 12705, 13488, 14766, 15326, 16223, 16248, 16290, 16319, 16362                                                                                                                                                                  |
| K1861  | Tib_5 | Anduo,<br>Naqu | A11a1a       | 73, 152, 235, 263, 272, 309+C, 315+C, 523-524d, 663, 750, 1005, 1438, 1736, 2706, 3106N, 4248, 4769, 4824, 5503, 5899+XC, 6755, 7028, 8794, 8843, 8860, 9650, 11719, 12705, 14207, 14766, 15326, 16093, 16223, 16290, 16293C, 16319, 16519                                                                                                          |
| K1677  | Tib_5 | Anduo,<br>Naqu | D4b2b8       | 73, 194, 199, 227T, 263, 309+C, 315+C, 390, 489, 523-524d, 750, 1382C, 1438, 2706, 3010, 3106N, 3398, 4769, 4883, 5178A, 7028, 8020, 8414, 8701, 8860, 8964, 9296, 9540, 9824A, 10398, 10400, 10873, 11719, 12705, 14668, 14766, 14783, 15043, 15301, 15326, 15613, 16173, 16223, 16362, 16519                                                      |



|       |       |                |             |                                                                                                                                                                                                                                                                                                               |
|-------|-------|----------------|-------------|---------------------------------------------------------------------------------------------------------------------------------------------------------------------------------------------------------------------------------------------------------------------------------------------------------------|
| K1852 | Tib_5 | Anduo,<br>Naqu | D4b2b10     | 40, 41, 73, 194, 199, 263, 309+CC, 315+C, 489, 523-524d, 750, 1382C, 1438, 2706, 3010, 3106N, 4769, 4883, 5178A, 7028, 8020, 8414, 8701, 8784, 8860, 8964, 9296, 9540, 9824A, 10398, 10400, 10873, 11719, 12705, 14668, 14766, 14783, 15043, 15301, 15326, 16223, 16243, 16362, 16519                         |
| K1867 | Tib_5 | Anduo,<br>Naqu | D4g2a1c1    | 73, 263, 298, 309+C, 315+C, 489, 750, 1438, 2706, 3010, 3106N, 4394, 4769, 4883, 5178A, 5231, 7028, 8414, 8701, 8860, 9540, 10398, 10400, 10873, 11059, 11719, 12705, 12966A, 13104, 13215, 14668, 14766, 14783, 15043, 15301, 15326, 16223, 16240, 16274, 16362, 16519                                       |
| K1828 | Tib_5 | Anduo,<br>Naqu | D4j1a1e     | 73, 263, 310, 489, 750, 1438, 2706, 3010, 3106N, 4769, 4883, 5178A, 5262, 7028, 7581, 7783, 8414, 8701, 8860, 9540, 10398, 10400, 10873, 11696, 11719, 12130, 12358, 12705, 14668, 14766, 14783, 15043, 15295, 15301, 15326, 16086, 16223, 16362, 16399, 16519                                                |
| K1989 | Tib_5 | Anduo,<br>Naqu | D4j1a1f     | 73, 263, 310, 489, 750, 1438, 2706, 3010, 3106N, 4769, 4883, 5178A, 5262, 5563, 7028, 7581, 7783, 8414, 8701, 8860, 9053, 9540, 10398, 10400, 10873, 11696, 11719, 12130, 12358, 12705, 14668, 14766, 14783, 15043, 15295, 15301, 15326, 16086, 16223, 16362                                                  |
| K1865 | Tib_5 | Anduo,<br>Naqu | D4j1a1d1    | 73, 263, 310, 489, 750, 1438, 2706, 3010, 3106N, 4769, 4883, 5178A, 5262, 7028, 7581, 7783, 8414, 8701, 8860, 9540, 10398, 10400, 10810, 10873, 11696, 11719, 12130, 12358, 12705, 14587, 14668, 14766, 14783, 15043, 15295, 15301, 15326, 16086, 16223, 16274, 16362, 16519                                  |
| K1853 | Tib_5 | Anduo,<br>Naqu | F1b1        | 73, 249d, 263, 310, 481, 523-524d, 750, 1438, 2706, 3106N, 3970, 4732, 4769, 5147, 6392, 6962, 7028, 8860, 10310, 10609, 10976, 11719, 12406, 12633, 12882, 13928C, 14476, 14766, 15326, 15725, 16183C, 16189, 16232A, 16249, 16304, 16311, 16362, 16519                                                      |
| K1821 | Tib_5 | Anduo,<br>Naqu | F1d         | 73, 249d, 263, 310, 523-524d, 750, 1189, 1438, 1734, 2706, 3106N, 3970, 4769, 5460, 5628, 6392, 6962, 7028, 7738, 8860, 10310, 10609, 10653, 11092, 11719, 12406, 12882, 13928C, 14766, 15326, 15402, 16189A, 16304, 16519                                                                                    |
| K1857 | Tib_5 | Anduo,<br>Naqu | F1d         | 73, 153, 195, 249d, 263, 309+C, 315+C, 523-524d, 750, 1189, 1438, 1734, 2706, 3106N, 3970, 4769, 5460, 5628, 6392, 6962, 7028, 7738, 8860, 10310, 10609, 11092, 11719, 12406, 12882, 13928C, 14750, 14766, 15326, 15402, 16140, 16188+CC, 16304, 16519                                                        |
| K1825 | Tib_5 | Anduo,<br>Naqu | F1g         | 73, 249d, 263, 310, 523-524d, 750, 1040, 1438, 2389, 2706, 3106N, 3398, 3970, 4769, 6392, 6962, 7028, 8658, 8860, 10310, 10609, 11719, 12406, 12882, 13928C, 14766, 15326, 16183C, 16189, 16304, 16519                                                                                                        |
| K1326 | Tib_5 | Anduo,<br>Naqu | G1a         | 73, 263, 310, 489, 709, 750, 1438, 2706, 2772, 3106N, 4769, 4833, 5108, 7028, 7867, 8200, 8701, 8860, 9540, 10398, 10400, 10873, 11719, 12705, 14180, 14569, 14766, 14783, 15043, 15301, 15323, 15326, 15497, 16223, 16362, 16519                                                                             |
| K1842 | Tib_5 | Anduo,<br>Naqu | H7b2        | 263, 309+C, 315+C, 750, 1438, 3106N, 4769, 4793, 5348, 8860, 13095, 13323, 15326, 16519                                                                                                                                                                                                                       |
| K2004 | Tib_5 | Anduo,<br>Naqu | M11a2a1a    | 73, 146, 200, 263, 309+C, 315+C, 318, 326, 489, 750, 1095, 1438, 2706, 3106N, 4769, 6531, 7028, 7642, 8108, 8701, 8860, 9540, 9950, 10398, 10400, 10873, 11404, 11719, 11969, 12705, 13074, 14340, 14766, 14783, 15043, 15301, 15326, 16173, 16223                                                            |
| K1557 | Tib_5 | Anduo,<br>Naqu | M13a2a1e    | 73, 152, 263, 310, 489, 513, 750, 1438, 2706, 2786, 3106N, 3644, 4769, 5773, 6023, 6253, 6620, 7028, 8405, 8701, 8860, 9540, 10373, 10398, 10400, 10411, 10790, 10873, 11719, 12705, 13395, 13981, 14766, 14783, 15043, 15301, 15326, 15924, 15944d, 16145, 16168, 16188, 16223, 16257, 16311, 16519          |
| K1822 | Tib_5 | Anduo,<br>Naqu | M61         | 73, 146, 152, 195, 263, 310, 489, 710, 750, 1193, 1342, 1438, 2706, 3106N, 4769, 5582C, 6253, 7028, 8269, 8701, 8860, 9540, 10398, 10400, 10873, 11719, 11810, 12705, 12732, 13356, 14766, 14783, 15043, 15301, 15326, 16176, 16223, 16260, 16270, 16362, 16381, 16519                                        |
| K1804 | Tib_5 | Anduo,<br>Naqu | M62a1a1     | 73, 143, 146, 150, 263, 489, 750, 1438, 2706, 2735, 3106N, 3511, 4561, 4763, 4769, 7028, 7664, 8149, 8701, 8860, 9540, 9935, 10398, 10400, 10873, 11719, 12223, 12245, 12705, 13708, 14766, 14783, 15043, 15301, 15326, 15510, 15520, 15629, 15721, 16147, 16189, 16193+CC, 16223, 16295, 16452, 16487, 16519 |
| K1811 | Tib_5 | Anduo,<br>Naqu | M7b1a1a3    | 73, 150, 199, 204, 207, 263, 310, 489, 750, 1438, 2706, 3106N, 4048, 4071, 4164, 4679, 4769, 5351, 5460, 6455, 6680, 7028, 7684, 7853, 8701, 8860, 9540, 9824, 10398, 10400, 10873, 11719, 12405, 12705, 12811, 14766, 14783, 14978, 15043, 15301, 15326, 16129, 16223, 16248, 16297                          |
| K1799 | Tib_5 | Anduo,<br>Naqu | M9a1a1c1b1a | 73, 263, 309+C, 315+C, 489, 711, 750, 1041, 1438, 2404, 2706, 3106N, 3394, 4491, 4769, 5306, 5899+XC, 7028, 7142, 7697, 8701, 8860, 9242, 9540, 10398, 10400, 10873, 11719, 12705, 14308, 14417, 14766, 14783, 15043, 15301, 15326, 16223, 16234, 16316, 16362                                                |
| K1802 | Tib_5 | Anduo,<br>Naqu | M9a1a2a1a   | 73, 153, 263, 310, 489, 513, 523-524d, 750, 1041, 1438, 2706, 3106N, 3394, 4491, 4769, 6512, 7028, 7256, 8485, 8701, 8860, 9540, 10398, 10400, 10873, 11719, 12705, 14308, 14766, 14783, 15043, 15301, 15326, 16145, 16223, 16234, 16316                                                                      |
| K1834 | Tib_5 | Anduo,<br>Naqu | M9a1b1e     | 73, 150, 152, 153, 263, 310, 489, 709, 750, 1041, 1438, 2706, 3106N, 3394, 4491, 4682, 4769, 7028, 8701, 8860, 9540, 10398, 10400, 10873, 11719, 12362, 12705, 14308, 14766, 14783, 15043, 15301, 15326, 15671, 16093, 16158, 16223, 16234, 16362, 16519                                                      |
| K1836 | Tib_5 | Anduo,<br>Naqu | U2e1h       | 73, 217, 228, 263, 309+CC, 315+C, 340, 508, 750, 1438, 1811, 2706, 3106N, 3720, 4769, 5390, 5426, 6045, 6152, 7028, 8860, 10876, 11467, 11719, 12308, 12372, 13020, 13734, 14766, 15326, 15907, 16051, 16129C, 16183C, 16193+C, 16362, 16519                                                                  |

|        |       |                |              |                                                                                                                                                                                                                                                                                              |
|--------|-------|----------------|--------------|----------------------------------------------------------------------------------------------------------------------------------------------------------------------------------------------------------------------------------------------------------------------------------------------|
| K1800  | Tib_5 | Anduo,<br>Naqu | D4jlale      | 73, 263, 310, 489, 750, 1438, 2706, 3010, 3106N, 4769, 4883, 5178A, 5262, 7028, 7581, 7783, 8414, 8701, 8860, 9540, 10398, 10400, 10873, 11696, 11719, 12130, 12358, 12705, 14668, 14766, 14783, 15043, 15295, 15301, 15326, 16086, 16223, 16362, 16399, 16519                               |
| K1796  | Tib_5 | Anduo,<br>Naqu | F1g          | 73, 249d, 263, 309+CC, 315+C, 523-524d, 750, 1438, 2389, 2706, 3106N, 3398, 3970, 4769, 6392, 6962, 7028, 8860, 10310, 10321, 10609, 11719, 12406, 12699, 12882, 12930, 13928C, 14766, 15326, 16182C, 16183C, 16189, 16304, 16519                                                            |
| K1863  | Tib_5 | Anduo,<br>Naqu | A            | 73, 152, 235, 263, 309+CC, 315+C, 523-524d, 576, 663, 750, 1438, 1736, 2706, 3106N, 4232, 4248, 4769, 4824, 7028, 8794, 8860, 11719, 12705, 14384, 14766, 15326, 16125, 16223, 16290, 16311, 16319, 16362                                                                                    |
| K1833  | Tib_5 | Anduo,<br>Naqu | A11a1a       | 73, 152, 235, 263, 309+C, 315+C, 523-524d, 663, 750, 1005, 1438, 1736, 1810, 2706, 3106N, 4248, 4769, 4824, 5899+XC, 6755, 7028, 8794, 8843, 8860, 9650, 11719, 12705, 14766, 15326, 16093, 16223, 16290, 16293C, 16319                                                                      |
| K1817  | Tib_5 | Anduo,<br>Naqu | D4j3b        | 73, 263, 309+C, 315+C, 338, 489, 750, 1438, 2706, 3010, 3106N, 4769, 4883, 5178A, 7028, 8414, 8701, 8860, 9540, 10398, 10400, 10873, 11696, 11719, 12705, 14668, 14766, 14783, 15043, 15301, 15326, 16184, 16223, 16278, 16311, 16362                                                        |
| K1846  | Tib_5 | Anduo,<br>Naqu | F1g          | 73, 249d, 263, 309+C, 315+C, 523-524d, 750, 1438, 2389, 2706, 3106N, 3398, 3970, 4769, 6392, 6962, 7028, 8658, 8860, 10310, 10609, 11719, 12406, 12882, 13928C, 14766, 15326, 16183C, 16189, 16304, 16519                                                                                    |
| K1813  | Tib_5 | Anduo,<br>Naqu | F1g          | 73, 249d, 263, 309+CC, 315+C, 523-524d, 750, 1438, 2389, 2706, 3106N, 3398, 3970, 4769, 6392, 6962, 7028, 8860, 10310, 10321, 10609, 11719, 12406, 12699, 12882, 12930, 13928C, 14766, 15326, 16182C, 16183C, 16189, 16304, 16519                                                            |
| K1809  | Tib_5 | Anduo,<br>Naqu | F1g          | 73, 249d, 263, 310, 523-524d, 750, 1040, 1438, 2389, 2706, 3106N, 3398, 3970, 4769, 6392, 6962, 7028, 8658, 8860, 10310, 10609, 11719, 12406, 12882, 13928C, 14766, 15326, 16183C, 16189, 16304, 16519                                                                                       |
| K2011  | Tib_5 | Anduo,<br>Naqu | G3a2         | 73, 143, 152, 195, 309+CC, 315+C, 489, 709, 750, 1438, 2706, 3106N, 4769, 4833, 5108, 7028, 7621, 8701, 8860, 9540, 10398, 10400, 10873, 11719, 12705, 14569, 14766, 14783, 15043, 15301, 15326, 15479, 15746, 16186, 16223, 16274, 16362                                                    |
| K1845  | Tib_5 | Anduo,<br>Naqu | M11a2a1a     | 73, 146, 200, 263, 310, 318, 326, 489, 750, 1095, 1438, 2706, 3106N, 4769, 6531, 7028, 7642, 8108, 8701, 8860, 9540, 9950, 10398, 10400, 10873, 11404, 11719, 11969, 12705, 13074, 14340, 14766, 14783, 15043, 15301, 15326, 16173, 16223                                                    |
| K1843  | Tib_5 | Anduo,<br>Naqu | M9a1a1c1b1a7 | 73, 263, 309+CC, 315+C, 489, 711, 750, 1041, 1438, 2706, 3106N, 3394, 4491, 4769, 5899+XC, 7028, 7142, 7697, 8701, 8860, 9242, 9540, 10398, 10400, 10873, 11719, 11887, 12705, 14308, 14417, 14766, 14783, 15043, 15301, 15326, 16223, 16234, 16316, 16362                                   |
| K1798  | Tib_5 | Anduo,<br>Naqu | M9a1a1c1b1a  | 73, 150, 195, 263, 309+C, 315+C, 489, 711, 750, 1041, 1438, 2706, 3106N, 3394, 4491, 4769, 5899+XC, 7028, 7142, 7604, 7697, 8152, 8701, 8860, 8998, 9242, 9540, 10398, 10400, 10873, 11719, 12705, 14308, 14417, 14766, 14783, 15043, 15301, 15326, 16223, 16234, 16243, 16311, 16316, 16362 |
| K1797  | Tib_5 | Anduo,<br>Naqu | M9a1a1c1b1a  | 73, 263, 309+C, 315+C, 489, 711, 750, 1041, 1438, 2706, 3106N, 3394, 4491, 4769, 5899+XC, 6293, 7028, 7142, 7697, 8701, 8860, 9242, 9540, 10398, 10400, 10873, 11719, 12705, 14308, 14417, 14766, 14783, 15043, 15301, 15326, 16223, 16234, 16316, 16362                                     |
| K1801  | Tib_5 | Anduo,<br>Naqu | M9a1a2a1a    | 73, 153, 263, 310, 489, 513, 523-524d, 750, 1041, 1438, 2706, 3106N, 3394, 4491, 4769, 6512, 7028, 7256, 8485, 8701, 8860, 9540, 10398, 10400, 10873, 11719, 12705, 14308, 14766, 14783, 15043, 15301, 15326, 16145, 16223, 16234, 16316                                                     |
| K1826  | Tib_5 | Anduo,<br>Naqu | N11a1        | 73, 195, 240, 263, 310, 523-524d, 750, 813, 1438, 2706, 3106N, 4769, 6375, 6674, 7028, 7975, 8618, 8860, 10289, 10908, 11581A, 11719, 12634, 12705, 14311, 14431, 14488, 14502, 14766, 15326, 15514, 15900, 16145, 16183C, 16189, 16193+C, 16223, 16355, 16519                               |
| K1849  | Tib_5 | Anduo,<br>Naqu | U2e1h        | 73, 217, 228, 263, 309+CC, 315+C, 340, 508, 750, 1438, 1811, 2706, 3106N, 3720, 4769, 5390, 5426, 6045, 6152, 7028, 8860, 10876, 11467, 11719, 12308, 12372, 13020, 13734, 14766, 15326, 15907, 16051, 16129C, 16183C, 16193+C, 16362, 16519                                                 |
| K38150 | Tib_5 | Anduo,<br>Naqu | A15c2        | 73, 152, 153, 235, 310, 523-524d, 663, 750, 771, 1438, 1736, 2706, 3106N, 4248, 4769, 4824, 7028, 8459, 8794, 8860, 9052, 11719, 12705, 13111, 14067, 14766, 15262, 15326, 16223, 16290, 16319, 16362                                                                                        |
| K1803  | Tib_5 | Anduo,<br>Naqu | D6a1         | 73, 263, 310, 489, 709, 750, 1438, 1719, 2706, 3106N, 3714, 4769, 4883, 4985, 5178A, 6701, 7028, 7424, 7879, 8701, 8860, 9540, 10398, 10400, 10873, 11719, 12654, 12705, 13194, 14766, 14783, 15043, 15218, 15301, 15326, 15388, 16223, 16274, 16362                                         |
| K1840  | Tib_5 | Anduo,<br>Naqu | A14a1        | 73, 151, 152, 200, 235, 263, 309+C, 315+C, 523-524d, 663, 735, 750, 1438, 1736, 2706, 3106N, 4248, 4769, 4824, 7028, 8334, 8794, 8860, 8862, 11719, 12004, 12705, 12990, 14766, 14803, 14905, 15326, 16093, 16172, 16223, 16278, 16290, 16319, 16362                                         |
| K1805  | Tib_5 | Anduo,<br>Naqu | F1g          | 73, 249d, 263, 310, 523-524d, 750, 1438, 2389, 2706, 3106N, 3398, 3970, 4769, 6392, 6962, 7028, 8860, 9389T, 10310, 10609, 11719, 12406, 12882, 13759, 13928C, 14766, 15326, 16183C, 16189, 16304, 16519                                                                                     |

|       |       |                 |              |                                                                                                                                                                                                                                                                                                                                   |
|-------|-------|-----------------|--------------|-----------------------------------------------------------------------------------------------------------------------------------------------------------------------------------------------------------------------------------------------------------------------------------------------------------------------------------|
| K1866 | Tib_5 | Anduo,<br>Naqu  | F2g1a        | 73, 249d, 263, 309+C, 315+C, 747, 750, 1005, 1438, 1824, 2706, 3106N, 3970, 4769, 6392, 6683, 7028, 7649, 7828, 8860, 10310, 10535, 10586, 11719, 12338, 12354, 13566, 13708, 13928C, 14766, 15326, 16185, 16266G, 16291, 16304, 16390, 16519                                                                                     |
| K1819 | Tib_5 | Anduo,<br>Naqu  | M13a2        | 73, 152, 263, 309+C, 315+C, 489, 513, 750, 1438, 2706, 2786, 3106N, 3644, 4769, 5773, 6023, 6253, 6620, 7028, 8405, 8563, 8701, 8860, 9540, 10373, 10398, 10400, 10411, 10790, 10873, 10920, 11204, 11719, 12705, 13395, 14766, 14769, 14783, 15043, 15236, 15301, 15326, 15924, 15944d, 16145, 16168, 16188, 16223, 16311, 16519 |
| K1810 | Tib_5 | Anduo,<br>Naqu  | M62a1a1      | 73, 143, 146, 150, 263, 489, 750, 1438, 2706, 2735, 3106N, 3511, 4561, 4763, 4769, 7028, 7664, 8149, 8701, 8860, 9540, 9935, 10398, 10400, 10873, 11719, 12223, 12245, 12705, 13708, 14766, 14783, 15043, 15301, 15326, 15510, 15520, 15629, 15721, 16147, 16188+CC, 16223, 16295, 16452, 16487, 16519                            |
| K1856 | Tib_5 | Anduo,<br>Naqu  | M8a          | 73, 263, 309+C, 315+C, 489, 750, 1438, 2706, 3106N, 4314d, 4715, 4769, 6081T, 6179, 7028, 7196A, , 8453, 8584, 8684, 8701, 8860, 9540, 10398, 10400, 10873, 11719, 12705, 13647, 14470, 14766, 14783, 15043, 15047, 15301, 15326, 15487T, 15697, 16223, 16298, 16319                                                              |
| K1847 | Tib_5 | Anduo,<br>Naqu  | M8a          | 73, 263, 309+C, 315+C, 489, 750, 1438, 2706, 3106N, 4314d, 4715, 4769, 6081T, 6179, 7028, 7196A, , 8453, 8584, 8684, 8701, 8860, 9540, 10398, 10400, 10873, 11719, 12705, 13647, 14470, 14766, 14783, 15043, 15047, 15301, 15326, 15487T, 15697, 16223, 16298, 16319                                                              |
| K1851 | Tib_5 | Anduo,<br>Naqu  | M9a1a1c1b1a8 | 73, 198, 263, 309+CC, 315+C, 489, 711, 750, 1041, 1438, 2706, 3106N, 3338, 3394, 3438, 3992, 4491, 4769, 5894C, 7028, 7142, 7697, 8701, 8860, 9098, 9242, 9540, 9632, 9921, 10398, 10400, 10873, 11719, 12112, 12705, 14308, 14417, 14766, 14783, 15043, 15301, 15326, 16223, 16234, 16316, 16362                                 |
| K1832 | Tib_5 | Anduo,<br>Naqu  | M9a1a1c1b1a  | 73, 263, 310, 489, 711, 750, 1041, 1438, 2706, 3106N, 3394, 4491, 4769, 5899+XC, 7028, 7142, 7697, 8701, 8860, 9242, 9540, 10398, 10400, 10873, 11719, 12705, 14308, 14417, 14766, 14783, 15043, 15301, 15326, 16223, 16234, 16316, 16362                                                                                         |
| K1835 | Tib_5 | Anduo,<br>Naqu  | M9a1a1c1b1a  | 73, 146TC, 152TC, 263, 309+C, 315+C, 489, 711, 750, 1041, 1438, 2706, 3106N, 3394, 4491, 4769, 5899+XC, 6719, 7028, 7142, 7697, 8701, 8860, 9242, 9540, 10398, 10400, 10873, 11719, 12705, 14308, 14417, 14766, 14783, 15043, 15301, 15326, 16223, 16234, 16316, 16362                                                            |
| K1831 | Tib_5 | Anduo,<br>Naqu  | M9a1b1e      | 73, 150, 152, 153, 263, 310, 489, 709, 750, 1041, 1438, 2706, 3106N, 3394, 4491, 4682, 4769, 7028, 8701, 8860, 9540, 10398, 10400, 10873, 11719, 12362, 12705, 14308, 14766, 14783, 15043, 15301, 15326, 15671, 16093, 16158, 16223, 16234, 16362, 16519                                                                          |
| K2006 | Tib_5 | Anduo,<br>Naqu  | U4a1         | 73, 143, 152, 195, 263, 309+C, 315+C, 499, 750, 1438, 1811, 2706, 3106N, 4646, 4769, 5999, 6047, 7028, 7382, 8533GA, 8818, 8860, 9518, 11332, 11467, 11719, 12308, 12372, 12937, 14620, 14766, 15326, 15346, 15693, 16134, 16274, 16356, 16519                                                                                    |
| K1900 | Tib_6 | Baqing,<br>Naqu | A            | 73, 152, 235, 263, 309+CC, 315+C, 523-524d, 663, 750, 1438, 1736, 2706, 3106N, 3828, 4248, 4760, 4769, 4824, 5704, 7028, 7337, 7765, 8794, 8860, 10724, 11719, 12705, 14766, 15142, 15326, 16223, 16290, 16319, 16362                                                                                                             |
| K1877 | Tib_6 | Baqing,<br>Naqu | G2b1b1       | 73, 263, 309+C, 315+C, 489, 709, 750, 1438, 2706, 3106N, 3975, 4769, 4833, 4853, 5108, 5601, 7028, 8701, 8860, 8877, 9540, 10398, 10400, 10873, 11719, 12375, 12705, 12795, 12892, 13563, 14563G, 14569, 14766, 14783, 15043, 15301, 15326, 16223, 16269, 16324, 16362                                                            |
| K1583 | Tib_6 | Baqing,<br>Naqu | D4b2b8       | 73, 152, 263, 310, 390, 489, 523-524d, 750, 1382C, 1438, 2706, 3010, 3106N, 3398, 4769, 4883, 5178A, 7028, 8020, 8414, 8701, 8860, 8964, 9296, 9540, 9824A, 10398, 10400, 10873, 11719, 12705, 13500, 14668, 14764, 14766, 14783, 15043, 15301, 15326, 15328, 15613, 16223, 16326, 16362, 16519                                   |
| K1881 | Tib_6 | Baqing,<br>Naqu | M9a1a1c1b1a  | 73, 263, 309+C, 315+C, 489, 711, 750, 1041, 1438, 2706, 3106N, 3338, 3394, 4491, 4769, 5899+XC, 7028, 7142, 7697, 8701, 8860, 9242, 9540, 10398, 10400, 10873, 11719, 12705, 14308, 14417, 14766, 14783, 15043, 15301, 15326, 16223, 16234, 16316, 16362                                                                          |
| K1871 | Tib_6 | Baqing,<br>Naqu | D4           | 73, 263, 309+C, 315+C, 489, 524+AC, 750, 1438, 2706, 3010, 3106N, 4136, 4769, 4883, 4928, 5178A, 6194, 7028, 8414, 8701, 8860, 9540, 9856, 10084, 10398, 10400, 10825, 10873, 11719, 12705, 14569, 14668, 14766, 14783, 14996, 15043, 15301, 15326, 15364, 16093, 16192, 16223, 16316, 16362                                      |
| K1910 | Tib_6 | Baqing,<br>Naqu | A21c         | 73, 151, 152, 235, 263, 310, 663, 750, 1438, 1736, 3106N, 4248, 4769, 4824, 7028, 8506, 8794, 8860, 11719, 12705, 13145, 14364, 14766, 14962, 15326, 16223, 16290, 16311, 16319, 16362                                                                                                                                            |
| K1909 | Tib_6 | Baqing,<br>Naqu | M13a1b       | 73, 152, 263, 310, 489, 750, 1438, 2706, 3106N, 3644, 4616, 4769, 5021, 5773, 6023, 6253, 6620, 7028, 8701, 8860, 9540, 10398, 10400, 10411, 10790, 10873, 11719, 12011, 12705, 13135, 14766, 14783, 15043, 15301, 15326, 15924, 16145, 16148, 16188, 16189, 16223, 16381                                                         |
| K1889 | Tib_6 | Baqing,<br>Naqu | M9a1a2a1a    | 73, 153, 263, 310, 489, 513, 523-524d, 750, 1041, 1438, 2706, 3106N, 3394, 4491, 4769, 6512, 7028, 7256, 8701, 8860, 9540, 10398, 10400, 10873, 11719, 12705, 13203, 14308, 14766, 14783, 15043, 15301, 15326, 16145, 16223, 16234, 16316, 16344                                                                                  |
| K1884 | Tib_6 | Baqing,<br>Naqu | M13a2a1a     | 73, 152, 263, 309+C, 315+C, 489, 513, 750, 1438, 2706, 2786, 3106N, 3644, 4769, 5435, 5773, 6023, 6253, 6620, 7028, 8405, 8701, 8860, 9540, 10373, 10398, 10400, 10411, 10790, 10873, 11719, 12705, 13395, 14766, 14783, 15043, 15301, 15326, 15924, 15944d, 16145, 16168, 16223, 16257, 16311, 16519                             |
| K1887 | Tib_6 | Baqing,<br>Naqu | A21b1        | 73, 152, 235, 263, 309+C, 315+C, 663, 750, 1438, 1736, 2706, 3106N, 4248, 4769, 4824, 6221, 7028, 8794, 8860, 9860, 11719, 12705, 13934, 14364, 14766, 15326, 16051, 16092, 16223, 16290, 16319, 16362                                                                                                                            |

|       |       |              |              |                                                                                                                                                                                                                                                                                                                                                            |
|-------|-------|--------------|--------------|------------------------------------------------------------------------------------------------------------------------------------------------------------------------------------------------------------------------------------------------------------------------------------------------------------------------------------------------------------|
| K1875 | Tib_6 | Baqing, Naqu | A21b         | 73, 152, 235, 263, 309+C, 315+C, 663, 750, 1438, 1736, 2706, 3106N, 4248, 4769, 4824, 6260, 7028, 8794, 8860, 11719, 12705, 13934, 14364, 14766, 15326, 16223, 16290, 16319, 16362                                                                                                                                                                         |
| K1872 | Tib_6 | Baqing, Naqu | M9a1a1c1b1a7 | 73, 93, 228, 263, 309+C, 315+C, 489, 711, 750, 1041, 1438, 2706, 3106N, 3204, 3394, 4491, 4769, 5899+XC, 6680, 7028, 7142, 7697, 8701, 8860, 9242, 9540, 9698Y, 10398, 10400, 10873, 11719, 11887, 12705, 14308, 14417, 14766, 14783, 15043, 15301, 15326, 16223, 16234, 16316, 16362                                                                      |
| K1911 | Tib_6 | Baqing, Naqu | D4j1a1d1     | 73, 263, 310, 489, 750, 1438, 2706, 3010, 3106N, 4769, 4883, 5178A, 5262, 7028, 7581, 7783, 8414, 8701, 8860, 9540, 10398, 10400, 10810, 10873, 11696, 11719, 12130, 12358, 12705, 14587, 14668, 14766, 14783, 15043, 15295, 15301, 15326, 16086, 16223, 16274, 16362, 16519                                                                               |
| K1893 | Tib_6 | Baqing, Naqu | D5a2a1       | 73, 150, 199, 263, 309+C, 315+C, 489, 523-524d, 573+XC, 750, 752, 1107, 2706, 3106N, 3172+A, 4769, 4883, 5178A, 5301, 7028, 8701, 8860, 9180, 9540, 10397, 10398, 10400, 10873, 11719, 11944, 12026, 12705, 13278, 13590, 14180, 14766, 14783, 15043, 15301, 15326, 16129, 16164, 16182C, 16183C, 16189, 16223, 16266, 16295, 16362                        |
| K1906 | Tib_6 | Baqing, Naqu | M62b1b1      | 73, 150, 203, 204, 263, 309+CC, 315+C, 489, 524+ACAC, 750, 1438, 2706, 2735, 3030, 3106N, 3511, 4561, 4769, 7028, 7664, 7807, 8149, 8701, 8860, 9540, 10398, 10400, 10873, 11719, 12705, 13708, 14766, 14783, 15043, 15301, 15326, 15510, 15520, 15629, 15721, 16093, 16223, 16260, 16295, 16362, 16519                                                    |
| K1879 | Tib_6 | Baqing, Naqu | U2e1h        | 73, 217, 228, 263, 309+CC, 315+C, 340, 508, 750, 1438, 1811, 2706, 3106N, 3720, 4769, 5390, 5426, 6045, 6152, 7028, 8860, 10876, 11467, 11719, 12308, 12372, 13020, 13734, 14766, 15326, 15907, 16051, 16129C, 16183C, 16193+C, 16270, 16362, 16519                                                                                                        |
| K1895 | Tib_6 | Baqing, Naqu | B4a4         | 73, 152, 193, 263, 309+CC, 315+C, 523-524d, 709, 750, 1438, 2706, 3106N, 4769, 5095, 5465, 7028, 8281-8289d, 8860, 9123, 11719, 14751, 14766, 15271, 15326, 15758, 16092, 16182C, 16183C, 16189, 16217, 16261, 16299, 16519                                                                                                                                |
| K1564 | Tib_6 | Baqing, Naqu | C4a1a1a1     | 73, 249d, 263, 310, 489, 523-524d, 750, 1438, 1715, 2232+AA, 2706, 3106N, 3552A, 3576, 4715, 4769, 4884, 4958, 6026, 7028, 7196A, 7999, 8508, 8584, 8701, 8860, 9540, 9545, 10398, 10400, 10873, 11719, 11914, 11969, 12672, 12705, 13263, 14318, 14766, 14783, 15043, 15204, 15301, 15326, 15487T, 15968, 16093, 16129, 16223, 16224, 16298, 16327, 16519 |
| K1758 | Tib_6 | Baqing, Naqu | D4i          | 64, 65A, 73, 195, 237, 263, 310, 489, 501, 750, 1187, 1438, 2706, 3010, 3106N, 3644, 4769, 4883, 5178A, 7028, 8414, 8701, 8860, 9540, 10398, 10400, 10873, 11719, 12705, 14180, 14668, 14766, 14783, 15043, 15301, 15326, 15884C, 16093, 16223, 16294, 16362                                                                                               |
| K1323 | Tib_6 | Baqing, Naqu | D4j1a1d      | 73, 195, 263, 310, 489, 750, 1438, 2706, 3010, 3106N, 4769, 4883, 5178A, 5262, 7028, 7581, 7783, 8414, 8701, 8860, 9540, 10398, 10400, 10873, 11696, 11719, 12130, 12358, 12705, 14668, 14766, 14783, 15043, 15295, 15301, 15326, 16086, 16223, 16274, 16293, 16362, 16519                                                                                 |
| K1870 | Tib_6 | Baqing, Naqu | D4j1a1e      | 73, 263, 310, 489, 750, 1438, 2706, 3010, 3106N, 4769, 4883, 5178A, 5262, 7028, 7581, 7783, 8414, 8701, 8860, 9540, 10398, 10400, 10873, 11696, 11719, 12130, 12358, 12705, 14668, 14766, 14783, 15043, 15295, 15301, 15326, 16086, 16223, 16362, 16399, 16519                                                                                             |
| K1904 | Tib_6 | Baqing, Naqu | F2a1         | 73, 249d, 263, 309+C, 315+C, 408A, 750, 1005, 1438, 1824, 2706, 3106N, 3970, 4769, 6392, 7028, 7828, 8281-8289d, 8860, 10310, 10535, 10586, 10810, 11719, 12338, 13708, 13928C, 14100, 14560, 14766, 15326, 16203, 16304, 16519                                                                                                                            |
| K1874 | Tib_6 | Baqing, Naqu | G1a2         | 73, 263, 309+C, 315+C, 489, 709, 750, 1438, 2706, 3106N, 4769, 4833, 5108, 7028, 7867, 8200, 8701, 8860, 9540, 10398, 10400, 10873, 11719, 12040, 12705, 14569, 14766, 14783, 14950, 15043, 15301, 15323, 15326, 15497, 16184, 16223, 16290, 16362, 16519                                                                                                  |
| K1890 | Tib_6 | Baqing, Naqu | G2a1h1a      | 73, 146, 263, 283, 309+CC, 315+C, 489, 709, 750, 1438, 2706, 3106N, 4158, 4769, 4833, 5108, 5601, 7028, 7600, 8701, 8860, 9377, 9540, 9575, 10398, 10400, 10873, 11084, 11719, 12705, 13194, 13563, 14200, 14569, 14766, 14783, 15043, 15301, 15326, 16227, 16278, 16362                                                                                   |
| K1905 | Tib_6 | Baqing, Naqu | G2b1b1       | 73, 263, 309+CC, 315+C, 489, 709, 750, 1438, 2706, 3106N, 4769, 4833, 4853, 5108, 5601, 7028, 8701, 8860, 8877, 8896, 9540, 9585, 10398, 10400, 10873, 11719, 12375, 12705, 13563, 14569, 14766, 14783, 15043, 15301, 15326, 16223, 16269, 16362                                                                                                           |
| K1914 | Tib_6 | Baqing, Naqu | G3b1         | 73, 195, 198, 263, 309+C, 315+C, 489, 709, 750, 1438, 2706, 3106N, 4769, 4833, 5108, 7028, 8701, 8860, 9540, 9599, 10398, 10400, 10873, 11719, 12705, 13477, 14569, 14605, 14766, 14783, 15043, 15301, 15326, 15927, 16093, 16104, 16223, 16274, 16362                                                                                                     |
| K1883 | Tib_6 | Baqing, Naqu | M9a1a1c1b1a  | 73, 263, 309+C, 315+C, 489, 711, 750, 1041, 1438, 2706, 3106N, 3394, 4491, 4769, 5899+XC, 7028, 7142, 7697, 8701, 8860, 9242, 9540, 10398, 10400, 10873, 11719, 12705, 14308, 14417, 14766, 14783, 15043, 15301, 15326, 16223, 16234, 16316, 16362                                                                                                         |
| K1896 | Tib_6 | Baqing, Naqu | M9a1a1c1b1a2 | 73, 146, 263, 297, 309+C, 315+C, 489, 711, 750, 1041, 1438, 2706, 3106N, 3394, 3438, 4491, 4769, 5899+XC, 6446, 7028, 7142, 7697, 8521, 8701, 8860, 9242, 9540, 10398, 10400, 10873, 11437, 11719, 12705, 14308, 14417, 14766, 14783, 15043, 15301, 15326, 16223, 16234, 16316, 16362                                                                      |
| K1868 | Tib_6 | Baqing, Naqu | M9a1b1c      | 73, 150, 152, 153, 263, 309+C, 315+C, 489, 750, 1041, 1438, 2706, 3106N, 3394, 4491, 4769, 7028, 8701, 8860, 9214, 9540, 10398, 10400, 10454, 10873, 11719, 12362, 12705, 14308, 14766, 14783, 15043, 15301, 15326, 15671, 16158, 16223, 16234, 16362, 16519                                                                                               |

|       |       |              |              |                                                                                                                                                                                                                                                                                                                                                     |
|-------|-------|--------------|--------------|-----------------------------------------------------------------------------------------------------------------------------------------------------------------------------------------------------------------------------------------------------------------------------------------------------------------------------------------------------|
| K1897 | Tib_6 | Baqing, Naqu | X2p          | 73, 195, 263, 309+C, 315+C, 750, 1438, 1719, 2625, 2706, 3106N, 4769, 6221, 6371, 7028, 7109, 8227, 8860, 10143, 11719, 12705, 13966, 14470, 14766, 15326, 16223, 16249, 16278, 16362, 16519                                                                                                                                                        |
| K1902 | Tib_6 | Baqing, Naqu | A15a1        | 73, 152, 199, 204, 207, 235, 309+C, 315+C, 523-524d, 663, 750, 1438, 1736, 2706, 3106N, 4248, 4769, 4824, 6239, 7028, 8459, 8794, 8860, 11084, 11719, 12705, 14067, 14766, 15326, 16223, 16274, 16290, 16319, 16362                                                                                                                                 |
| K1508 | Tib_6 | Baqing, Naqu | B4d4         | 73, 263, 309+CC, 315+C, 750, 827, 1438, 2706, 2755, 3106N, 4769, 5321, 5372, 6324C, 7028, 8281-8289d, 8860, 11084, 11719, 11914, 13942, 14766, 15326, 15448, 15535, 15930, 16183C, 16189, 16193+CC, 16217, 16234, 16519                                                                                                                             |
| K1892 | Tib_6 | Baqing, Naqu | D4j1a1e      | 73, 263, 310, 489, 750, 1438, 2706, 3010, 3106N, 4769, 4883, 5178A, 5262, 7028, 7581, 7783, 8414, 8701, 8860, 9540, 10398, 10400, 10873, 11696, 11719, 12130, 12358, 12705, 14668, 14766, 14783, 15043, 15295, 15301, 15326, 16086, 16223, 16362, 16399, 16519                                                                                      |
| K1869 | Tib_6 | Baqing, Naqu | D4j1a1c      | 73, 195, 263, 309+C, 315+C, 489, 709, 750, 1438, 2706, 3010, 3106N, 3397, 4769, 4883, 5178A, 5262, 6704, 7028, 7581, 7783, 8414, 8701, 8860, 9540, 10398, 10400, 10873, 11696, 11719, 12130, 12358, 12705, 14668, 14766, 14783, 15043, 15295, 15301, 15326, 16086, 16092, 16223, 16362                                                              |
| K1594 | Tib_6 | Baqing, Naqu | G3a1a2       | 16T, 73, 143, 150, 263, 309+C, 315+C, 489, 709, 750, 1438, 2706, 3106N, 4769, 4833, 5108, 6962, 7028, 8701, 8860, 8861, 9540, 10398, 10400, 10873, 11719, 11914, 12705, 14569, 14766, 14783, 15043, 15301, 15326, 15465, 15746, 16148, 16153, 16215, 16223, 16274                                                                                   |
| K1526 | Tib_6 | Baqing, Naqu | Z3a          | 73, 152, 249d, 263, 309+C, 315+C, 489, 750, 1438, 2706, 3106N, 4715, 4769, 5399, 6752, 7028, 7196A, 8020, 8584, 8701, 8860, 9090, 9540, 9713, 10208, 10398, 10400, 10873, 11719, 12705, 13620, 13942, 14766, 14783, 15043, 15301, 15326, 15487T, 15784, 15928, 16185, 16223, 16260, 16298                                                           |
| K1885 | Tib_6 | Baqing, Naqu | F1c1a1a      | 73, 152, 249d, 263, 309+C, 315+C, 523-524d, 573+XC, 709, 750, 1438, 2706, 3106N, 3970, 4769, 6392, 6599, 6962, 7028, 7684, 8860, 9053, 9647, 10310, 10454, 10609, 11719, 12406, 12882, 13759, 13928C, 14766, 15326, 16111, 16129, 16266, 16304, 16519                                                                                               |
| K1473 | Tib_6 | Baqing, Naqu | A14b1        | 73, 152, 200, 235, 263, 315+C, 523-524d, 663, 735, 750, 1438, 1598, 1736, 2706, 3106N, 4248, 4769, 4824, 7028, 7705, 7805, 8794, 8860, 11719, 12705, 14766, 15326, 16223, 16290, 16319, 16362                                                                                                                                                       |
| K1901 | Tib_6 | Baqing, Naqu | M9a1a2a1b1   | 73, 153, 263, 309+C, 315+C, 489, 513, 750, 1041, 1438, 2706, 3106N, 3394, 4491, 4769, 7028, 7256, 8701, 8860, 9540, 10398, 10400, 10873, 11719, 12705, 14142A, 14308, 14766, 14783, 15043, 15301, 15326, 16145, 16223, 16234, 16293, 16316                                                                                                          |
| K1982 | Tib_6 | Baqing, Naqu | A11a1a       | 73, 152, 235, 263, 310, 523-524d, 663, 750, 1005, 1438, 1736, 2706, 3106N, 4248, 4769, 4812, 4824, 5899+XC, 6755, 7028, 8794, 8843, 8860, 9650, 11719, 12705, 12915A, 13135, 14110, 14766, 15326, 16093, 16223, 16290, 16293C, 16319                                                                                                                |
| K1674 | Tib_6 | Baqing, Naqu | D4b2b8       | 73, 194, 263, 309+C, 315+C, 390, 456, 489, 523-524d, 750, 1382C, 1438, 2706, 3010, 3106N, 3398, 4769, 4883, 5178A, 7028, 7474, 8020, 8414, 8701, 8860, 8964, 9296, 9540, 9824A, 10398, 10400, 10873, 11719, 12705, 14668, 14766, 14783, 15043, 15301, 15326, 15613, 16223, 16362, 16519                                                             |
| K1425 | Tib_6 | Baqing, Naqu | D4j1a1       | 73, 263, 309+C, 315+C, 489, 523-524d, 750, 1438, 2706, 3010, 3106N, 4769, 4883, 5054, 5178A, 5262, 7028, 7581, 7783, 8414, 8701, 8860, 9540, 10191G, 10398, 10400, 10873, 10915, 11696, 11719, 12130, 12358, 12705, 14569, 14668, 14766, 14783, 15043, 15295, 15301, 15326, 16086, 16150, 16223, 16362, 16519                                       |
| K1903 | Tib_6 | Baqing, Naqu | F1b1         | 73, 249d, 263, 310, 481, 523-524d, 750, 1438, 2706, 3106N, 3970, 4732, 4769, 5147, 6392, 6962, 7028, 8860, 10310, 10609, 10976, 11719, 12406, 12633, 12882, 13928C, 14476, 14766, 15326, 15725, 16183C, 16189, 16232A, 16249, 16304, 16311, 16519                                                                                                   |
| K1888 | Tib_6 | Baqing, Naqu | F2b1         | 73, 146, 249d, 263, 310, 523-524d, 750, 1005, 1438, 1824, , 2706, 3106N, 3970, 4769, 4811, 5150, 6392, 7028, 7828, 8860, 10310, 10535, 10586, 11719, 12338, 13708, 13928C, 14766, 15326, 16092A, 16093, 16183C, 16189, 16193+C, 16291, 16304, 16311                                                                                                 |
| K1913 | Tib_6 | Baqing, Naqu | M9a1a1c1b1a3 | 73, 263, 309+CC, 315+C, 489, 711, 750, 1041, 1438, 2706, 3106N, 3394, 4491, 4769, 5899+XC, 7028, 7142, 7697, 8701, 8860, 9242, 9540, 10398, 10400, 10873, 11719, 12705, 13419, 14308, 14417, 14766, 14783, 15043, 15301, 15326, 16223, 16234, 16316, 16362                                                                                          |
| K1916 | Tib_6 | Baqing, Naqu | A14a1        | 73, 151, 152, 200, 235, 263, 310, 523-524d, 663, 735, 750, 1438, 1736, 2706, 3106N, 4248, 4769, 4824, 7028, 8334, 8794, 8860, 8862, 11719, 12004, 12705, 12990, 14766, 14803, 15326, 16093, 16172, 16223, 16290, 16319, 16362                                                                                                                       |
| K1894 | Tib_6 | Baqing, Naqu | M13a2a1e     | 73, 152, 263, 310, 489, 513, 750, , 1438, , 2706, 2786, 3106N, 3644, 4769, 5773, 6023, 6253, 6620, 7028, 8405, 8701, 8860, 9540, 10373, 10398, 10400, 10411, 10790, 10873, 11719, 12135C\A, M, 12705, 13395, 13981, 14766, 14783, 15043, 15301, 15326, 15924, 15944d, 16145, 16168, 16188, 16223, 16257, 16311, 16519                               |
| K1899 | Tib_6 | Baqing, Naqu | Z3a          | 73, 152, 249d, 263, 309+C, 315+C, 489, 750, 1438, 2706, 3106N, 4715, 4769, 5399, 6752, 7028, 7196A, 8584, 8701, 8860, 9090, 9540, 9626, 9713, 10208, 10398, 10400, 10873, 11719, 12705, 13620, 13942, 14766, 14783, 15043, 15301, 15326, 15487T, 15784, 15928, 16185, 16223, 16260, 16298                                                           |
| K1680 | Tib_6 | Baqing, Naqu | C4a1a1a3     | 73, 249d, 263, 310, 489, 523-524d, 750, 1438, 1715, 2232+AA, 2706, 3106N, 3552A, 3576, 4715, 4769, 4884, 4958, 6026, 7028, 7196A, 7999, 8508, 8584, 8701, 8860, 9540, 9545, 10398, 10400, 10873, 11719, 11914, 11969, 12672, 12705, 13263, 14318, 14766, 14783, 15043, 15204, 15301, 15326, 15487T, 15617, 15968, 16129, 16223, 16298, 16327, 16519 |

|        |       |              |             |                                                                                                                                                                                                                                                                                                                           |
|--------|-------|--------------|-------------|---------------------------------------------------------------------------------------------------------------------------------------------------------------------------------------------------------------------------------------------------------------------------------------------------------------------------|
| K1509  | Tib_6 | Baqing, Naqu | R31?        | 73, 146, 249d, 263, 310, 523-524d, 750, 1438, 1531, 2706, 3106N, 3963, 4769, 7028, 7295, 7981, 8860, 9380, 11719, 13557, 14553, 14766, 15326, 15458, 16172, 16265T, 16304, 16362, 16519                                                                                                                                   |
| K1969  | Tib_7 | Jiali, Naqu  | F2g1a       | 73, 249d, 263, 310, 747, 750, 1005, 1438, 1824, 2706, 3106N, 3834, 3970, 4769, 6267, 6392, 6485, 6683, 7028, 7754, 7828, 8860, 10310, 10535, 10586, 11719, 12338, 13708, 13928C, 14766, 15326, 16185, 16266A, 16291, 16304, 16519                                                                                         |
| K1475  | Tib_7 | Jiali, Naqu  | D4j3b1      | 73, 94, 263, 309+C, 315+C, 338, 489, 750, 1438, 2706, 3010, 3106N, 4769, 4883, 5178A, 7028, 8414, 8701, 8860, 9540, 10398, 10400, 10873, 11696, 11719, 12705, 14668, 14766, 14783, 15043, 15301, 15326, 16184, 16223, 16311, 16362                                                                                        |
| K38192 | Tib_7 | Jiali, Naqu  | M9a1a1c1b1a | 73, 263, 309+CC, 315+C, 489, 524+AC, 711, 750, 1041, 1438, 2706, 3106N, 3394, 3736, 4491, 4769, 5899+XC, 7028, 7142, 7697, 8701, 8860, 9242, 9540, 10398, 10400, 10873, 11719, 12705, 14308, 14417, 14766, 14783, 15043, 15301, 15326, 16223, 16234, 16316, 16362                                                         |
| K1298  | Tib_7 | Jiali, Naqu  | Z3a         | 73, 249d, 263, 279, 310, 489, 750, 1438, 1700, 2706, 3106N, 4491, 4715, 4769, 5399, 6752, 7028, 7196A, 8584, 8701, 8860, 9090, 9128, 9540, 9713, 10208, 10398, 10400, 10873, 11719, 12705, 12810, 13620, 13942, 14766, 14783, 15043, 15301, 15326, 15487T, 15784, 15928, 16111A, 16185, 16215, 16223, 16260, 16298, 16355 |
| K1300  | Tib_7 | Jiali, Naqu  | A14b1       | 73, 152, 200, 235, 263, 310, 523-524d, 663, 735, 750, 1438, 1598, 1736, 2706, 3106N, 4248, 4769, 4824, 7028, 7705, 7805, 8794, 8860, 11719, 12705, 14766, 15326, 16223, 16290, 16319, 16362                                                                                                                               |
| K1297  | Tib_7 | Jiali, Naqu  | A15a1       | 73, 152, 199, 204, 207, 235, 309+CC, 315+C, 523-524d, 663, 750, 1438, 1736, 2706, 3106N, 4248, 4769, 4824, 6239, 7028, 8459, 8794, 8860, 11084, 11719, 12705, 14067, 14766, 15326, 16223, 16274, 16290, 16319, 16362, 16519                                                                                               |
| K1253  | Tib_7 | Jiali, Naqu  | A15a1       | 73, 152, 199, 204, 207, 235, 309+CC, 315+C, 523-524d, 663, 750, 1438, 1736, 2706, 3106N, 4248, 4769, 4824, 6239, 7028, 8459, 8794, 8860, 11084, 11719, 12705, 14067, 14766, 15326, 16223, 16274, 16290, 16319, 16362, 16519                                                                                               |
| K1270  | Tib_7 | Jiali, Naqu  | D4b2b8      | 73, 263, 310, 390, 489, 523-524d, 750, 1382C, 1438, 2706, 3010, 3106N, 3398, 4769, 4883, 5178A, 7028, 8020, 8414, 8701, 8860, 8964, 9296, 9540, 9824A, 10398, 10400, 10873, 11719, 12705, 12940, 13488, 13500, 14668, 14766, 14783, 15043, 15301, 15326, 15613, 16223, 16362, 16519                                       |
| K1279  | Tib_7 | Jiali, Naqu  | D4j3b       | 73, 263, 309+C, 315+C, 338, 489, 750, 1438, 2706, 3010, 3106N, 4769, 4883, 5178A, 7028, 8414, 8701, 8860, 9540, 10398, 10400, 10873, 11696, 11719, 12705, 13212, 14668, 14766, 14783, 15043, 15301, 15326, 16181, 16184, 16223, 16311, 16362                                                                              |
| K1301  | Tib_7 | Jiali, Naqu  | H7b2        | 263, 309+C, 315+C, 750, 1438, 3106N, 4769, 4793, 5348, 5460, 6266, 8860, 13323, 15326, 16519                                                                                                                                                                                                                              |
| K1258  | Tib_7 | Jiali, Naqu  | M62b1b1     | 73, 150, 203, 204, 263, 309+C, 315+C, 489, 524+ACAC, 750, 1438, 2706, 2735, 3030, 3106N, 3511, 4561, 4769, 7028, 7664, 7807, 8149, 8701, 8860, 9540, 10398, 10400, 10873, 11719, 12705, 13708, 14766, 14783, 15043, 15301, 15326, 15510, 15520, 15629, 15721, 16093, 16223, 16260, 16295, 16362, 16519                    |
| K1294  | Tib_7 | Jiali, Naqu  | M9a1b1d     | 73, 150, 152, 153, 263, 310, 489, 750, 1041, 1438, 2706, 3106N, 3394, 4491, 4769, 7028, 8701, 8860, 9010, 9540, 10398, 10400, 10873, 11719, 12362, 12705, 14308, 14766, 14783, 15043, 15119, 15301, 15326, 15671, 16158, 16223, 16234, 16362, 16519                                                                       |
| K1286  | Tib_7 | Jiali, Naqu  | A15a1       | 73, 152, 199, 204, 207, 235, 309+CC, 315+C, 523-524d, 663, 750, 1438, 1736, 2706, 3106N, 4248, 4769, 4824, 6239, 7028, 8459, 8794, 8860, 11084, 11719, 12705, 14067, 14766, 15326, 16223, 16274, 16290, 16319, 16362, 16519                                                                                               |
| K1274  | Tib_7 | Jiali, Naqu  | A17a2       | 73, 152, 235, 263, 523-524d, 538, 663, 723, 750, 1438, 1736, 2706, 3106N, 4113, 4248, 4769, 4824, 5514, 7028, 8794, 8860, 9126, 11719, 12705, 14766, 15217, 15326, 16037, 16086, 16129, 16223, 16278, 16290, 16319, 16362                                                                                                 |
| K1285  | Tib_7 | Jiali, Naqu  | D4j3b       | 73, 263, 309+CC, 315+C, 338, 489, 750, 1438, 2706, 3010, 3106N, 4769, 4883, 5178A, 7028, 8414, 8701, 8860, 9540, 10398, 10400, 10873, 11696, 11719, 12705, 14668, 14766, 14783, 15043, 15301, 15326, 16184, 16223, 16311, 16362                                                                                           |
| K1283  | Tib_7 | Jiali, Naqu  | F1b1        | 73, 249d, 263, 309+C, 315+C, 523-524d, 750, 2706, 3106N, 3970, 4732, 4769, 5147, 6392, 6962, 7028, 8860, 10310, 10609, 10976, 11719, 12406, 12633, 12882, 13928C, 14476, 14766, 15326, 16183C, 16189, 16193+CC, 16232A, 16249, 16304, 16311, 16360, 16519                                                                 |
| K1256  | Tib_7 | Jiali, Naqu  | F1d1a2      | 73, 146, 249d, 263, 309+C, 315+C, 523-524d, 750, 1438, 1734, 2706, 3106N, 3970, 4769, 5341T, 5628, 6392, 6962, 7028, 7738, 8860, 10310, 10609, 11152, 11719, 12406, 12882, 13135, 13928C, 14766, 15326, 15402, 16129, 16145, 16183C, 16189, 16284, 16304, 16519                                                           |
| K1271  | Tib_7 | Jiali, Naqu  | F2g1a       | 73, 249d, 263, 310, 747, 750, 1005, 1438, 1824, 2706, 3106N, 3834, 3970, 4769, 6267, 6392, 6683, 7028, 7754, 7828, 8860, 10310, 10535, 10586, 11719, 12338, 13708, 13928C, 14766, 15326, 16185, 16266A, 16291, 16304, 16519                                                                                               |
| K1269  | Tib_7 | Jiali, Naqu  | G3a1a1a     | 16T, 73, 143, 150, 263, 309+C, 315+C, 489, 709, 750, 1438, 2706, 3106N, 4674, 4769, 4833, 5108, 7028, 8701, 8860, 8861, 9540, 10398, 10400, 10873, 11719, 11914, 12612, 12705, 14569, 14766, 14783, 15043, 15301, 15326, 15746, 16215, 16223, 16274                                                                       |

|       |       |             |               |                                                                                                                                                                                                                                                                                                                   |
|-------|-------|-------------|---------------|-------------------------------------------------------------------------------------------------------------------------------------------------------------------------------------------------------------------------------------------------------------------------------------------------------------------|
| K1559 | Tib_7 | Jiali, Naqu | M13a2a1a      | 73, 152, 263, 309+C, 315+C, 489, 513, 750, 1438, 2706, 2786, 3106N, 3644, 4769, 5773, 6023, 6253, 6620, 7028, 8405, 8701, 8860, 9540, 10373, 10398, 10400, 10411, 10790, 10873, 11719, 12705, 13395, 14766, 14783, 15043, 15301, 15326, 15924, 15944d, 16145, 16168, 16172, 16223, 16257, 16311, 16519            |
| K1536 | Tib_7 | Jiali, Naqu | M9a1a1c1b1a5  | 73, 159, 263, 310, 489, 711, 750, 1041, 1438, 2706, 3106N, 3394, 4491, 4769, 5899+XC, 7028, 7142, 7697, 8701, 8860, 9242, 9540, 10398, 10400, 10873, 11719, 12705, 14308, 14766, 14783, 15043, 15301, 15326, 15766, 16223, 16234, 16316, 16362                                                                    |
| K1290 | Tib_7 | Jiali, Naqu | M9a1a1c1b1a   | 73, 263, 309+C, 315+C, 489, 711, 750, 1041, 1438, 2706, 3106N, 3394, 4491, 4769, 5899+XC, 7028, 7142, 7697, 8701, 8860, 9242, 9540, 9782, 10398, 10400, 10873, 11719, 12705, 14308, 14417, 14766, 14783, 15043, 15301, 15326, 16223, 16234, 16316, 16362                                                          |
| K1284 | Tib_7 | Jiali, Naqu | M9a1a1c1b1a13 | 73, 263, 309+C, 315+C, 489, 711, 750, 1041, 1438, 2706, 3106N, 3394, 3866, 4021, 4491, 4769, 5474, 5899+XC, 7028, 7142, 7697, 8701, 8860, 9242, 9540, 10398, 10400, 10873, 11719, 12705, 14308, 14417, 14766, 14783, 15043, 15301, 15326, 16094, 16194, 16223, 16234, 16316, 16362                                |
| K1296 | Tib_7 | Jiali, Naqu | A14a1         | 73, 151, 152, 200, 235, 263, 309+C, 315+C, 523-524d, 663, 735, 750, 1438, 1736, 2706, 3106N, 4248, 4769, 4824, 7028, 8334, 8794, 8860, 8862, 11719, 12004, 12705, 12990, 14766, 14803, 15326, 16093, 16172, 16223, 16278, 16290, 16319, 16362                                                                     |
| K1278 | Tib_7 | Jiali, Naqu | M13a1b        | 73, 152, 263, 310, 489, 710, 750, 1438, 2706, 3106N, 3644, 4769, 5773, 6023, 6253, 6620, 7028, 8020, 8701, 8860, 9540, 10398, 10400, 10411, 10790, 10873, 11719, 11818, 12705, 13135, 13827, 14766, 14783, 15043, 15301, 15326, 15924, 16145, 16148, 16188, 16189, 16223, 16381                                   |
| K1293 | Tib_7 | Jiali, Naqu | M13a2         | 73, 152, 263, 309+C, 315+C, 489, 513, 709, 750, 1438, 2706, 2786, 3106N, 3644, 4769, 5773, 6023, 6253, 6620, 7028, 8405, 8701, 8860, 8939, 9540, 10373, 10398, 10400, 10411, 10790, 10873, 11719, 12705, 13395, 14198, 14766, 14783, 15043, 15301, 15326, 15924, 15944d, 16145, 16168, 16188, 16223, 16311, 16519 |
| K1275 | Tib_7 | Jiali, Naqu | M9a1a1c1b1a13 | 73, 263, 309+C, 315+C, 489, 711, 750, 1041, 1438, 2706, 3106N, 3394, 3866, 4021, 4491, 4769, 5474, 5899+XC, 7028, 7142, 7697, 8701, 8860, 9242, 9540, 10398, 10400, 10873, 11719, 12705, 14308, 14417, 14766, 14783, 15043, 15301, 15326, 16094, 16194, 16223, 16234, 16316, 16362                                |
| K1260 | Tib_7 | Jiali, Naqu | M9a1a1c1b1a   | 73, 263, 309+C, 315+C, 489, 711, 750, 1041, 1438, 2706, 3106N, 3394, 4491, 4769, 5899+XC, 7028, 7142, 7697, 8701, 8860, 9242, 9540, 10398, 10400, 10873, 11719, 12705, 14308, 14417, 14766, 14783, 15043, 15301, 15326, 16223, 16234, 16316, 16362                                                                |
| K1259 | Tib_7 | Jiali, Naqu | M9a1a1c1b1a   | 73, 263, 309+C, 315+C, 489, 573+XC, 711, 750, 1041, 1438, 2706, 3106N, 3394, 4491, 4769, 5899+XC, 7028, 7142, 7697, 8701, 8860, 9242, 9540, 9932, 10398, 10400, 10873, 11719, 11770, 12705, 14308, 14417, 14766, 14783, 15043, 15301, 15326, 15497, 16223, 16234, 16316, 16362                                    |
| K1266 | Tib_7 | Jiali, Naqu | T1a1b1        | 73, 152, 195, 263, 309+C, 315+C, 709, 750, 1438, 1888, 2706, 3106N, 4216, 4769, 4917, 7028, 8697, 8860, 9548, 9899, 10143, 10463, 11251, 11719, 12028, 12633A, 13368, 14281, 14766, 14905, 15326, 15452A, 15607, 15928, 16126, 16129, 16163, 16186, 16189, 16234A, 16294, 16519                                   |
| K1272 | Tib_7 | Jiali, Naqu | F1d1a2        | 73, 146, 249d, 263, 309+C, 315+C, 523-524d, 750, 1438, 1734, 2706, 3106N, 3970, 4769, 5628, 6392, 6962, 7028, 7738, 8860, 9053, 10310, 10609, 11719, 12406, 12882, 13135, 13928C, 14766, 15326, 15402, 16145, 16189, 16193+CC, 16284, 16304, 16519                                                                |
| K1254 | Tib_7 | Jiali, Naqu | G2b1b2a       | 73, 263, 309+C, 315+C, 489, 709, 750, 1438, 2706, 3106N, 3975, 4769, 4833, 4853, 5108, 5601, 7028, 8701, 8860, 8877, 9540, 10398, 10400, 10873, 11719, 12375, 12705, 12795, 13563, 14563G, 14569, 14766, 14783, 15043, 15301, 15326, 16223, 16324, 16362                                                          |
| K1276 | Tib_7 | Jiali, Naqu | A             | 73, 152, 235, 263, 309+C, 315+C, 523-524d, 576, 663, 750, 1438, 1736, 2706, 3106N, 3229+A, 4232, 4248, 4769, 4824, 7028, 8794, 8860, 11719, 12705, 14766, 15326, 16125, 16223, 16290, 16311, 16319, 16362                                                                                                         |
| K1325 | Tib_7 | Jiali, Naqu | A15a          | 73, 152, 204, 207, 235, 309+CC, 315+C, 523-524d, 663, 750, 1438, 1736, 2706, 3106N, 4053, 4248, 4769, 4824, 7028, 8200, 8459, 8794, 8860, 11084, 11719, 12705, 14067, 14533A, 14569, 14766, 14831, 15326, 16223, 16274, 16290, 16319, 16362                                                                       |
| K1273 | Tib_7 | Jiali, Naqu | A17a2         | 73, 152, 235, 263, 523-524d, 538, 663, 723, 750, 1438, 1736, 2706, 3106N, 4113, 4248, 4769, 4824, 5514, 7028, 8794, 8860, 9126, 11719, 12705, 14766, 15217, 15326, 16037, 16086, 16129, 16223, 16278, 16290, 16319, 16362                                                                                         |
| K1265 | Tib_7 | Jiali, Naqu | F1b1          | 73, 249d, 263, 309+C, 315+C, 523-524d, 750, 2706, 3106N, 3764CT, 3970, 4732, 4769, 5147, 6392, 6962, 7028, 8860, 10310, 10609, 10976, 11719, 12406, 12633, 12882, 13928C, 14476, 14766, 15326, 16183C, 16189, 16193+CC, 16232A, 16249, 16304, 16311, 16360, 16519                                                 |
| K1291 | Tib_7 | Jiali, Naqu | F1g           | 73, 249d, 263, 310, 523-524d, 750, 1438, 2389, 2706, 3106N, 3398, 3970, 4769, 6392, 6962, 7028, 8860, 10310, 10609, 11719, 12406, 12882, 13928C, 14766, 15326, 16129, 16182C, 16183C, 16189, 16304, 16519                                                                                                         |
| K1252 | Tib_7 | Jiali, Naqu | G1            | 73, 263, 310, 489, 709, 750, 1438, 2706, 3106N, 4769, 4833, 5108, 7028, 7867, 8200, 8701, 8860, 9540, 10398, 10400, 10873, 11305, 11719, 12705, 14569, 14766, 14783, 15043, 15301, 15323, 15326, 15497, 16223, 16311, 16362, 16519                                                                                |
| K1299 | Tib_7 | Jiali, Naqu | G1            | 73, 263, 309+CC, 315+C, 489, 709, 750, 1438, 2706, 3106N, 4769, 4833, 5108, 7028, 7867, 8200, 8701, 8860, 9540, 10398, 10400, 10873, 11719, 12705, 14569, 14766, 14783, 15043, 15301, 15323, 15326, 15497, 16223, 16362, 16519                                                                                    |

|       |       |                  |               |                                                                                                                                                                                                                                                                                                                      |
|-------|-------|------------------|---------------|----------------------------------------------------------------------------------------------------------------------------------------------------------------------------------------------------------------------------------------------------------------------------------------------------------------------|
| K1250 | Tib_7 | Jiali, Naqu      | K1a4          | 73, 263, 310, 497, 573+XC, 750, 1189, 1438, 1811, 2706, 3106N, 3480, 4769, 7028, 8588, 8860, 9055, 9575, 9667, 9698, 10398, 10550, 10560, 11299, 11467, 11485, 11719, 12308, 12372, 14167, 14766, 14798, 15326, 15904, 16093, 16145, 16224, 16311, 16519                                                             |
| K1277 | Tib_7 | Jiali, Naqu      | M13a1b        | 73, 152, 263, 310, 489, 710, 750, 1438, 2706, 3106N, 3644, 4769, 5773, 6023, 6253, 6620, 7028, 8020, 8701, 8860, 9540, 10398, 10400, 10411, 10790, 10873, 11719, 11818, 12705, 13135, 13827, 14766, 14783, 15043, 15301, 15326, 15924, 16145, 16148, 16188, 16189, 16223, 16381                                      |
| K1268 | Tib_7 | Jiali, Naqu      | M7b1a1a3      | 73, 150, 199, 204, 207, 263, 310, 489, 750, 1438, 2706, 3106N, 4048, 4071, 4164, 4679, 4769, 5351, 5460, 6455, 6680, 7028, 7684, 7853, 8701, 8860, 9540, 9824, 10398, 10400, 10873, 11719, 12405, 12705, 12811, 14766, 14783, 14978, 15043, 15301, 15326, 16129, 16223, 16248, 16297                                 |
| K1267 | Tib_7 | Jiali, Naqu      | M9a1a1c1b1a   | 73, 263, 309+C, 315+C, 489, 711, 750, 1041, 1438, 2706, 3106N, 3394, 4491, 4769, 5899+XC, 7028, 7142, 7697, 8701, 8860, 9242, 9540, 10398, 10400, 10873, 11719, 12705, 14308, 14417, 14766, 14783, 15043, 15301, 15326, 16223, 16234, 16316, 16362                                                                   |
| K1289 | Tib_7 | Jiali, Naqu      | M9a1b1d       | 73, 150, 152, 153, 263, 310, 489, 750, 1041, 1438, 2706, 3106N, 3394, 4491, 4769, 7028, 8701, 8860, 9010, 9540, 10398, 10400, 10873, 11719, 12362, 12705, 14308, 14766, 14783, 15043, 15119, 15301, 15326, 15671, 16158, 16223, 16234, 16362, 16519                                                                  |
| K2278 | Tib_8 | Kangma, Shigatse | F1g2          | 73, 195, 249d, 263, 309+CC, 315+C, 523-524d, 750, 1438, 2389, 2706, 3106N, 3398, 3970, 4769, 6392, 6962, 7013, 7028, 8860, 10310, 10609, 11719, 12406, 12882, 13928C, 14766, 15326, 16182C, 16183C, 16189, 16304, 16519                                                                                              |
| K2277 | Tib_8 | Kangma, Shigatse | A11a1a        | 73, 152, 235, 263, 309+CC, 315+C, 523-524d, 663, 750, 1005, 1438, 1736, 2706, 3106N, 4248, 4769, 4824, 5432, 5899+XC, 6392, 6755, 7028, 8794, 8843, 8860, 9650, 11719, 12705, 14766, 15326, 16093, 16223, 16290, 16293C, 16319                                                                                       |
| K2240 | Tib_8 | Kangma, Shigatse | C4a2b         | 73, 249d, 263, 310, 489, 513, 750, 1438, 2232+A, 2706, 2887, 3106N, 3552A, 4696, 4715, 4769, 6026, 7028, 7196A, 7286, 8584, 8701, 8860, 9540, 9545, 10398, 10400, 10873, 11719, 11914, 11969, 12624, 12672, 12705, 13263, 14318, 14766, 14783, 15043, 15204, 15301, 15326, 15487T, 16223, 16298, 16327, 16357, 16519 |
| K2191 | Tib_8 | Kangma, Shigatse | M62b2a        | 73, 150, 187T, 204, 263, 309+C, 315+C, 489, 750, 1438, 2706, 2735, 3106N, 3511, 3693, 4561, 4769, 6305, 7028, 7364, 7664, 8149, 8701, 8860, 9540, 10398, 10400, 10873, 11719, 12705, 13708, 14766, 14783, 15043, 15301, 15326, 15510, 15520, 15629, 15721, 16192, 16223, 16260, 16278, 16311, 16519                  |
| K2190 | Tib_8 | Kangma, Shigatse | A11a1a        | 73, 152, 235, 263, 309+CC, 315+C, 523-524d, 663, 750, 1005, 1438, 1736, 2706, 3106N, 4248, 4769, 4824, 5899+XC, 6755, 7028, 8794, 8843, 8860, 9650, 11719, 12705, 14766, 15326, 16093, 16223, 16290, 16293C, 16319, 16362, 16497                                                                                     |
| K2166 | Tib_8 | Kangma, Shigatse | M9a1a1c1b1a   | 73, 195, 263, 310, 318, 489, 711, 750, 1041, 1438, 2706, 3106N, 3394, 4491, 4769, 5899+XC, 7028, 7142, 7697, 8701, 8860, 9242, 9540, 10398, 10400, 10873, 11719, 12705, 14308, 14417, 14766, 14783, 15043, 15301, 15326, 16129, 16223, 16234, 16316, 16362, 16390                                                    |
| K2478 | Tib_8 | Kangma, Shigatse | A11a1a        | 73, 151, 152, 235, 263, 309+C, 315+C, 523-524d, 663, 750, 1005, 1438, 1736, 2706, 3106N, 4248, 4769, 4824, 5899+XC, 6755, 7028, 8794, 8843, 8860, 9650, 11719, 12705, 14766, 15326, 16223, 16290, 16293C, 16319                                                                                                      |
| K2475 | Tib_8 | Kangma, Shigatse | G2b1b         | 73, 263, 309+C, 315+C, 489, 709, 750, 1438, 2706, 3106N, 4769, 4833, 4853, 5108, 5601, 7028, 8701, 8860, 8877, 8896, 9540, 9585, 10398, 10400, 10873, 11719, 12375, 12705, 13563, 14569, 14766, 14783, 15043, 15148, 15301, 15326, 16223, 16362                                                                      |
| K2440 | Tib_8 | Kangma, Shigatse | A11a1a        | 73, 152, 235, 263, 309+C, 315+C, 523-524d, 663, 750, 1005, 1438, 1736, 2706, 3106N, 4248, 4769, 4824, 5899+XC, 6497, 6755, 7028, 8639, 8794, 8843, 8860, 9650, 11176, 11719, 12705, 14766, 15326, 16093, 16223, 16290, 16293C, 16319, 16519                                                                          |
| K2433 | Tib_8 | Kangma, Shigatse | M9a1a1c1b1a   | 73, 263, 310, 489, 711, 750, 1041, 1438, 2706, 3106N, 3394, 4491, 4769, 5655, 5899+XC, 7028, 7142, 7697, 8701, 8860, 9138, 9242, 9540, 10398, 10400, 10873, 11719, 12425C, 12705, 14308, 14417, 14766, 14783, 15043, 15301, 15326, 15924, 16223, 16234, 16316, 16362                                                 |
| K2927 | Tib_8 | Kangma, Shigatse | M9a1a1c1b1a12 | 73, 263, 309+CC, 315+C, 489, 711, 750, 1041, 1438, 2706, 3106N, 3394, 4491, 4769, 5899+XC, 7028, 7142, 7697, 8701, 8860, 9242, 9540, 10398, 10400, 10873, 11719, 12705, 14308, 14417, 14766, 14783, 15043, 15301, 15326, 15440, 16114G, 16223, 16234, 16316, 16362                                                   |
| K2659 | Tib_8 | Kangma, Shigatse | F1c1a1a       | 73, 152, 249d, 263, 309+CC, 315+C, 523-524d, 573+XC, 709, 750, 1438, 2706, 3106N, 3970, 4769, 6392, 6599, 6962, 7028, 8860, 9053, 9647, 10310, 10454, 10609, 11719, 12397, 12406, 12882, 13759, 13928C, 14766, 15326, 16111, 16129, 16266, 16304, 16519                                                              |
| K2510 | Tib_8 | Kangma, Shigatse | M9a1a1c1b1a14 | 73, 263, 310, 489, 711, 750, 1041, 1438, 2706, 3106N, 3394, 4491, 4769, 5899+XC, 7028, 7142, 7697, 8701, 8860, 9242, 9540, 10398, 10400, 10873, 11719, 12705, 13528, 13681, 14308, 14417, 14766, 14783, 15043, 15301, 15326, 16223, 16234, 16256, 16316, 16362                                                       |
| K2311 | Tib_8 | Kangma, Shigatse | M9a1b1c       | 73, 150, 152, 153, 263, 310, 489, 750, 1041, 1438, 2706, 3106N, 3394, 4491, 4769, 7028, 7785, 8701, 8860, 9540, 10398, 10400, 10454, 10873, 11719, 12362, 12705, 14308, 14766, 14783, 15043, 15301, 15326, 15671, 16158, 16223, 16234, 16362, 16519                                                                  |
| K3031 | Tib_8 | Kangma, Shigatse | Z4a           | 73, 151, 152, 249d, 263, 309+C, 315+C, 489, 750, 1438, 2706, 3106N, 4715, 4769, 6752, 7028, 7196A, 7822, 7859, 8584, 8701, 8860, 9090, 9540, 10398, 10400, 10873, 11719, 12705, 14514G, 14766, 14783, 15043, 15301, 15326, 15475, 15487T, 15727, 15784, 15944d, 16037, 16129, 16185, 16223, 16260, 16298             |



|       |       |                  |             |                                                                                                                                                                                                                                                                                                                           |
|-------|-------|------------------|-------------|---------------------------------------------------------------------------------------------------------------------------------------------------------------------------------------------------------------------------------------------------------------------------------------------------------------------------|
| K2925 | Tib_8 | Kangma, Shigatse | F1g2        | 73, 195, 249d, 263, 309+CC, 315+C, 523-524d, 750, 1438, 2389, 2706, 3106N, 3398, 3970, 4769, 6392, 6962, 7028, 8860, 10310, 10609, 11719, 12406, 12882, 13928C, 14766, 15326, 16183C, 16189, 16193+C, 16304, 16519                                                                                                        |
| K2869 | Tib_8 | Kangma, Shigatse | F1c1a1a2    | 73, 143, 152, 249d, 263, 309+C, 315+C, 523-524d, 573+XC, 709, 750, 1438, 2706, 3106N, 3970, 4769, 6392, 6599, 6962, 7028, 8860, 9053, 9647, 10310, 10454, 10609, 10739, 11719, 12406, 12882, 13759, 13928C, 14182, 14766, 15326, 16111, 16129, 16266, 16304, 16519                                                        |
| K2867 | Tib_8 | Kangma, Shigatse | M10a1b      | 73, 263, 310, 489, 573+XC, 709, 750, 1438, 2706, 3106N, 3172+C, 4140, 4769, 5393, 7028, 7250, 8701, 8793, 8856, 8860, 9540, 10398, 10400, 10646, 10873, 11719, 12549, 12705, 13152, 14502, 14766, 14783, 15040, 15043, 15071, 15218, 15301, 15326, 15461, 16066, 16223, 16311                                             |
| K2864 | Tib_8 | Kangma, Shigatse | D4s1a       | 73, 199, 263, 309+C, 315+C, 489, 524+AC, 750, 813, 1438, 2706, 3010, 3106N, 4769, 4883, 5178A, 7028, 8414, 8701, 8860, 9540, 10398, 10400, 10873, 11719, 12662, 12705, 14668, 14766, 14783, 15043, 15301, 15326, 15734, 16223, 16319, 16362, 16519                                                                        |
| K2861 | Tib_8 | Kangma, Shigatse | A           | 73, 152, 195, 235, 263, 310, 523-524d, 663, 750, 1438, 1736, 2163, 2706, 3106N, 3906, 4248, 4769, 4824, 6367, 6911, 7028, 8794, 8860, 11252, 11719, 12705, 14766, 15326, 16223, 16290, 16319, 16362                                                                                                                       |
| K2859 | Tib_8 | Kangma, Shigatse | B5b1        | 73, 263, 309+CC, 315+C, 523-524d, 709, 750, 960+XC, 1438, 1598, 2706, 3106N, 4418, 4769, 6101, 6719, 7028, 8281-8289d, 8584, 8784, 8829, 8860, 9950, 10398, 11719, 12361, 14384, 14527, 14766, 15077, 15223, 15326, 15508, 15662, 15851, 15927, 16140, 16182C, 16183C, 16189, 16243, 16519                                |
| K2693 | Tib_8 | Kangma, Shigatse | D5a2a1      | 51, 58, 73, 150, 199, 263, 310, 489, 523-524d, 750, 752, 930, 1107, 2706, 3106N, 4769, 4883, 5178A, 5301, 5483, 7028, 8613, 8701, 8860, 9180, 9540, 10397, 10398, 10400, 10873, 11719, 11944, 12026, 12705, 13278, 14766, 14783, 15043, 15301, 15326, 16092, 16129, 16164, 16182C, 16183C, 16189, 16223, 16266, 16362     |
| K2687 | Tib_8 | Kangma, Shigatse | D5a2a       | 73, 150, 263, 310, 489, 523-524d, 750, 752, 1107, 2706, 3106N, 4769, 4883, 5178A, 5301, 7028, 8410, 8701, 8860, 9180, 9540, 10397, 10398, 10400, 10873, 11719, 11944, 12026, 12705, 14766, 14783, 15043, 15301, 15326, 16164, 16172, 16182C, 16183C, 16189, 16223, 16266, 16362                                           |
| K2513 | Tib_8 | Kangma, Shigatse | G2b1a       | 73, 263, 310, 489, 709, 750, 1438, 2706, 3106N, 4769, 4833, 4853, 5108, 5601, 7028, 8701, 8860, 8877, 9540, 10398, 10400, 10873, 11151, 11719, 12705, 13563, 14569, 14687, 14766, 14783, 15043, 15301, 15326, 16223, 16362                                                                                                |
| K2509 | Tib_8 | Kangma, Shigatse | M13a2       | 73, 152, 263, 309+CC, 315+C, 489, 513, 750, 1438, 2706, 2786, 3106N, 3644, 4769, 5773, 6023, 6253, 6620, 6719, 7028, 8405, 8701, 8829, 8860, 9540, 10373, 10398, 10400, 10411, 10790, 10873, 11719, 12705, 13395, 14766, 14783, 15043, 15301, 15326, 15924, 15944d, 16145, 16168, 16188, 16223, 16257, 16311, 16519       |
| K2479 | Tib_8 | Kangma, Shigatse | A11a1a      | 73, 151, 152, 235, 263, 309+C, 315+C, 523-524d, 663, 750, 1005, 1438, 1736, 2706, 3106N, 4248, 4769, 4824, 5899+XC, 6755, 7028, 8794, 8843, 8860, 9650, 11719, 12705, 14766, 14777, 15326, 16223, 16290, 16293C, 16319                                                                                                    |
| K2436 | Tib_8 | Kangma, Shigatse | D4q         | 73, 200, 204, 263, 309+C, 315+C, 489, 750, 1438, 2706, 3010, 3106N, 4769, 4883, 5178A, 7028, 8414, 8701, 8860, 9540, 10398, 10400, 10873, 11719, 12705, 14668, 14766, 14783, 15043, 15301, 15326, 16223, 16256, 16261, 16311, 16362, 16519                                                                                |
| K2435 | Tib_8 | Kangma, Shigatse | M13a2a1d    | 73, 152, 263, 309+C, 315+C, 489, 513, 750, 1393, 1438, 2706, 2786, 3106N, 3644, 4769, 4928, 5773, 6023, 6253, 6620, 7028, 8405, 8701, 8860, 9540, 10373, 10398, 10400, 10411, 10790, 10873, 11719, 12705, 13395, 14100, 14766, 14783, 15043, 15301, 15326, 15924, 15944d, 16145, 16168, 16188, 16223, 16257, 16311, 16519 |
| K2241 | Tib_8 | Kangma, Shigatse | F1g         | 73, 150, 249d, 263, 309+CCC, 315+C, 750, 980, 1438, 2389, 2706, 3106N, 3398, 3970, 4769, 6392, 6962, 7028, 7754, 8860, 10310, 10609, 10792, 11719, 12406, 12882, 13928C, 14766, 15310, 15326, 16183C, 16189, 16193+CC, 16304, 16519                                                                                       |
| K2238 | Tib_8 | Kangma, Shigatse | D4h1c2a     | 73, 152, 195, 241, 263, 310, 489, 709, 750, 1438, 2706, 3010, 3106N, 3336, 3644, 3645, 3834C, 4182, 4769, 4883, 5048, 5178A, 6881, 7028, 7181, 7673, 8179, 8414, 8701, 8860, 9540, 10398, 10400, 10873, 11719, 12705, 13914A, 14668, 14766, 14783, 15043, 15301, 15326, 16174, 16223, 16311, 16362                        |
| K2186 | Tib_8 | Kangma, Shigatse | F1c1a1a     | 73, 152, 249d, 263, 309+CC, 315+C, 523-524d, 573+XC, 709, 750, 1438, 2706, 3106N, 3970, 4769, 6392, 6599, 6962, 7028, 8860, 9053, 9647, 10310, 10454, 10609, 11719, 12397, 12406, 12882, 13759, 13928C, 14766, 15080, 15326, 16111, 16129, 16266, 16304, 16519                                                            |
| K2170 | Tib_8 | Kangma, Shigatse | D4o2a       | 73, 195, 263, 309+C, 315+C, 489, 750, 1438, 2706, 3010, 3106N, 3789, 4769, 4883, 5178A, 7028, 8414, 8701, 8860, 9077, 9540, 10398, 10400, 10646, 10873, 11719, 12705, 13812, 14668, 14766, 14783, 15043, 15301, 15326, 16093, 16223, 16232, 16290, 16362, 16519                                                           |
| K2168 | Tib_8 | Kangma, Shigatse | M9a1a1c1b1a | 73, 263, 309+CC, 315+C, 489, 711, 750, 1041, 1438, 2706, 3106N, 3394, 4491, 4769, 5899+XC, 7028, 7142, 7697, 8701, 8860, 9242, 9540, 10398, 10400, 10873, 11719, 12705, 14308, 14417, 14766, 14783, 15043, 15301, 15326, 16223, 16234, 16316, 16362                                                                       |
| K2164 | Tib_8 | Kangma, Shigatse | M13a2a1d    | 73, 152, 263, 309+C, 315+C, 489, 513, 750, 1393, 1438, 2706, 2786, 3106N, 3644, 4769, 4928, 5773, 6023, 6253, 6620, 7028, 8405, 8701, 8860, 9540, 10373, 10398, 10400, 10411, 10790, 10873, 11719, 12705, 13395, 14100, 14766, 14783, 15043, 15301, 15326, 15924, 15944d, 16145, 16168, 16188, 16223, 16257, 16311, 16519 |

|       |       |                  |               |                                                                                                                                                                                                                                                                                                                                                      |
|-------|-------|------------------|---------------|------------------------------------------------------------------------------------------------------------------------------------------------------------------------------------------------------------------------------------------------------------------------------------------------------------------------------------------------------|
| K2689 | Tib_8 | Kangma, Shigatse | M13a1b        | 73, 152, 263, 310, 489, 750, 1438, 1836, 2706, 3106N, 3644, 4769, 5773, 6023, 6253, 6620, 7028, 8701, 8860, 9540, 10398, 10400, 10411, 10790, 10873, 11719, 12705, 13135, 13708, 14766, 14783, 15043, 15301, 15326, 15924, 16145, 16148, 16188, 16189, 16223, 16381                                                                                  |
| K2658 | Tib_8 | Kangma, Shigatse | M13a2a1c      | 73, 152, 263, 309+C, 315+C, 489, 513, 745+T, 750, 1438, 2706, 2786, 3106N, 3644, 4769, 5773, 6023, 6253, 6620, 7028, 7147, 7679, 8405, 8563, 8701, 8860, 9540, 10373, 10398, 10400, 10411, 10790, 10873, 11204, 11719, 12705, 13395, 14766, 14783, 15043, 15236, 15301, 15326, 15891, 15924, 15944d, 16145, 16168, 16188, 16223, 16257, 16311, 16519 |
| K2438 | Tib_8 | Kangma, Shigatse | D4            | 73, 263, 309+C, 315+C, 489, 750, 1438, 2706, 3010, 3106N, 4769, 4883, 5178A, 6497, 7028, 8414, 8701, 8860, 9540, 9812, 10398, 10400, 10601, 10873, 11719, 12705, 13153, 14668, 14766, 14783, 14883, 15043, 15301, 15326, 15884, 16223, 16362                                                                                                         |
| K2872 | Tib_8 | Kangma, Shigatse | M8a2a1        | 73, 263, 309+C, 315+C, 489, 750, 827, 1438, 2706, 2835, 3106N, 4715, 4769, 6179, 7028, 7196A, 8245, 8584, 8684, 8701, 8860, 9540, 10398, 10400, 10873, 11176, 11719, 12705, 14208, 14470, 14766, 14783, 15043, 15301, 15326, 15487T, 16147G, 16184, 16189, 16223, 16298, 16319, 16468, 16470, 16471, 16473                                           |
| K2860 | Tib_8 | Kangma, Shigatse | M9a1a1c1b1a   | 73, 263, 309+CC, 315+C, 489, 711, 750, 1041, 1438, 2706, 3106N, 3394, 4491, 4769, 5899+XC, 7028, 7142, 7697, 8701, 8860, 9242, 9540, 10398, 10400, 10873, 11719, 12705, 14308, 14417, 14766, 14783, 15043, 15301, 15326, 16223, 16234, 16316, 16362                                                                                                  |
| K2439 | Tib_8 | Kangma, Shigatse | A11a1a        | 73, 152, 235, 263, 309+C, 315+C, 523-524d, 663, 750, 1005, 1438, 1736, 2706, 3106N, 4248, 4769, 4824, 5899+XC, 6755, 7028, 8794, 8843, 8860, 9650, 11719, 12528, 12705, 14766, 15326, 16093, 16223, 16290, 16293C, 16319, 16519                                                                                                                      |
| K2511 | Tib_8 | Kangma, Shigatse | A11b          | 73, 152, 235, 263, 309+C, 315+C, 523-524d, 663, 750, 1092, 1438, 1736, 2706, 3106N, 3290, 4248, 4769, 4824, 7028, 8794, 8860, 9650, 11719, 12705, 13676, 14180, 14766, 15326, 16223, 16234, 16290, 16293C, 16311, 16319, 16519, 16527                                                                                                                |
| K2434 | Tib_8 | Kangma, Shigatse | A21b1a        | 63, 64, 66T, 73, 152, 235, 263, 309+C, 315+C, 663, 750, 1047, 1438, 1736, 2706, 3106N, 4248, 4769, 4824, 7028, 8794, 8860, 11719, 12705, 13934, 14364, 14766, 15326, 16092, 16223, 16290, 16319, 16362                                                                                                                                               |
| K2236 | Tib_8 | Kangma, Shigatse | D4b2b8        | 73, 194, 263, 309+CC, 315+C, 390, 489, 523-524d, 750, 1382C, 1438, 2706, 3010, 3106N, 3398, 4769, 4883, 5178A, 7028, 8020, 8414, 8701, 8860, 8964, 9296, 9540, 9824A, 10398, 10400, 10873, 11719, 12705, 14668, 14766, 14783, 15043, 15301, 15326, 15613, 16223, 16292, 16362, 16519                                                                 |
| K2314 | Tib_8 | Kangma, Shigatse | F1b1          | 73, 249d, 263, 310, 523-524d, 750, 1438, 2706, 2757, 3106N, 3970, 4732, 4769, 5147, 6392, 6962, 7028, 8860, 10310, 10609, 10976, 11719, 12406, 12633, 12882, 13444G, 13928C, 14476, 14766, 15326, 16183C, 16189, 16232A, 16249, 16311, 16519                                                                                                         |
| K2239 | Tib_8 | Kangma, Shigatse | F1c1a1a       | 73, 152, 185, 249d, 263, 309+C, 315+C, 523-524d, 573+XC, 709, 750, 1438, 2706, 3106N, 3970, 4769, 6392, 6599, 6962, 7028, 8860, 9053, 9531, 9647, 10310, 10454, 10609, 11719, 12406, 12882, 13759, 13928C, 14766, 15326, 16111, 16129, 16266, 16304, 16519                                                                                           |
| K2579 | Tib_8 | Kangma, Shigatse | G2a1f         | 73, 263, 309+C, 315+C, 489, 709, 750, 1438, 2386A, 2706, 3106N, 4769, 4833, 5108, 5601, 7028, 7600, 8701, 8860, 9377, 9540, 9575, 9659, 10398, 10400, 10873, 11719, 12705, 13563, 13884, 14200, 14569, 14766, 14783, 15043, 15301, 15326, 16051, 16114, 16223, 16227, 16278, 16291, 16362                                                            |
| K2306 | Tib_8 | Kangma, Shigatse | G2b1b         | 73, 263, 309+C, 315+C, 489, 709, 750, 1438, 2706, 3106N, 4769, 4833, 4853, 5108, 5601, 7028, 8701, 8860, 8877, 8896, 9540, 9585, 10398, 10400, 10873, 11719, 12375, 12705, 13563, 14569, 14766, 14783, 15043, 15148, 15301, 15326, 16223, 16362                                                                                                      |
| K2874 | Tib_8 | Kangma, Shigatse | M9a1a1c1b1a   | 73, 263, 310, 489, 711, 750, 1041, 1438, 2706, 3106N, 3394, 4491, 4769, 5899+XC, 7028, 7142, 7697, 8701, 8860, 9242, 9540, 10398, 10400, 10873, 11719, 12705, 14308, 14417, 14766, 14783, 15043, 15301, 15326, 16163, 16223, 16234, 16316, 16362                                                                                                     |
| K2868 | Tib_8 | Kangma, Shigatse | M9a1a1c1b1a   | 73, 263, 309+CC, 315+C, 489, 711, 750, 1041, 1438, 2706, 3106N, 3394, 4491, 4769, 5618, 5899+XC, 7028, 7142, 7697, 8701, 8860, 9242, 9540, 10398, 10400, 10873, 11719, 12705, 14308, 14417, 14766, 14783, 15043, 15301, 15326, 16223, 16234, 16316, 16362                                                                                            |
| K2242 | Tib_8 | Kangma, Shigatse | M9a1a1c1b1a   | 73, 263, 309+CC, 315+C, 489, 711, 750, 1041, 1438, 2706, 3106N, 3394, 4077, 4491, 4769, 5899+XC, 7028, 7142, 7697, 8701, 8860, 9242, 9540, 10398, 10400, 10873, 11719, 12192, 12705, 14308, 14417, 14766, 14783, 15043, 15301, 15326, 16223, 16234, 16316, 16362                                                                                     |
| K2237 | Tib_8 | Kangma, Shigatse | M9a1a1c1b1a12 | 73, 263, 309+C, 315+C, 489, 711, 750, 1041, 1438, 2706, 3106N, 3394, 3397, 4491, 4769, 5899+XC, 7028, 7142, 7697, 8701, 8860, 9242, 9540, 10398, 10400, 10873, 11719, 12705, 13113, 14308, 14417, 14766, 14783, 15043, 15301, 15326, 16114G, 16223, 16234, 16311, 16316, 16362                                                                       |
| K2688 | Tib_8 | Kangma, Shigatse | M9a1a1c1b1a1  | 73, 263, 309+C, 315+C, 489, 711, 750, 1041, 1438, 2706, 3106N, 3394, 4491, 4769, 5899+XC, 7028, 7142, 7697, 8567, 8701, 8860, 9242, 9540, 10398, 10400, 10873, 11719, 11908, 12705, 14308, 14417, 14514, 14766, 14783, 15043, 15301, 15326, 16223, 16234, 16316, 16362                                                                               |
| K2305 | Tib_8 | Kangma, Shigatse | A11a1a        | 73, 152, 235, 263, 310, 523-524d, 663, 750, 1005, 1438, 1736, 2706, 3106N, 4248, 4769, 4824, 5414, 5899+XC, 6497, 6755, 7028, 7674, 8794, 8843, 8860, 9650, 11719, 12705, 14766, 15326, 16093, 16223, 16290, 16293C, 16319, 16519                                                                                                                    |
| K2312 | Tib_8 | Kangma, Shigatse | A15a          | 73, 152, 204, 207, 235, 309+CC, 315+C, 523-524d, 663, 750, 1438, 1736, 2706, 3106N, 4248, 4769, 4824, 7028, 8459, 8794, 8860, 11084, 11719, 12705, 14067, 14569, 14766, 14831, 15326, 16223, 16274, 16290, 16319, 16362                                                                                                                              |

|       |       |                  |          |                                                                                                                                                                                                                                                                                                                                                            |
|-------|-------|------------------|----------|------------------------------------------------------------------------------------------------------------------------------------------------------------------------------------------------------------------------------------------------------------------------------------------------------------------------------------------------------------|
| K2304 | Tib_8 | Kangma, Shigatse | C4a1a1a2 | 73, 146, 249d, 263, 310, 489, 750, 1438, 1715, 2232+AA, 2706, 3106N, 3397, 3552A, 3576, 4715, 4769, 4884, 4958, 5918, 6026, 7028, 7196A, 7999, 8508, 8584, 8701, 8860, 9540, 9545, 10398, 10400, 10873, 11719, 11914, 11969, 12672, 12705, 13263, 14318, 14766, 14783, 15043, 15204, 15301, 15326, 15487T, 15968, 16093, 16129, 16223, 16298, 16327, 16519 |
| K2661 | Tib_8 | Kangma, Shigatse | C4d2     | 73, 152, 195, 249d, 263, 310, 489, 750, 1438, 2706, 3106N, 3552A, 4715, 4769, 4907, 6026, 7028, 7100, 7196A, 8584, 8701, 8860, 9540, 9545, 10398, 10400, 10873, 11719, 11914, 11969, 12705, 12780, 13263, 14318, 14766, 14783, 15043, 15204, 15236, 15301, 15326, 15487T, 16093, 16298, 16327, 16519                                                       |
| K2313 | Tib_8 | Kangma, Shigatse | D4j1b    | 73, 185, 263, 309+C, 315+C, 489, 750, 1438, 1734, 2706, 3010, 3106N, 4300, 4769, 4883, 5178A, 5262, 7028, 7055, 8414, 8701, 8860, 9540, 10398, 10400, 10873, 11696, 11719, 12705, 14668, 14766, 14783, 15043, 15301, 15326, 16223, 16362                                                                                                                   |
| K2581 | Tib_8 | Kangma, Shigatse | F1d1a2a1 | 73, 146, 234, 249d, 263, 309+CC, 315+C, 523-524d, 750, 1438, 1734, 1888, 2706, 3106N, 3970, 4769, 5628, 6392, 6962, 7028, 7738, 8167, 8860, 10310, 10609, 11719, 12372, 12406, 12882, 13135, 13928C, 14766, 15326, 15402, 16145, 16255, 16284, 16304, 16519                                                                                                |
| K2442 | Tib_8 | Kangma, Shigatse | G2a1i    | 73, 195, 198, 263, 278, 310, 489, 709, 750, 1438, 2706, 3106N, 4769, 4833, 5108, 5601, 7028, 7600, 8701, 8860, 9377, 9540, 9575, 10398, 10400, 10873, 11719, 12705, 13563, 14200, 14569, 14766, 14783, 15043, 15301, 15326, 16129, 16223, 16278, 16362                                                                                                     |
| K2690 | Tib_8 | Kangma, Shigatse | H2       | 146, 263, 310, 750, 1438, 3106N, 4769, 8281-8289d, 8860, 13314, 14022, 15326, 16172, 16186, 16519                                                                                                                                                                                                                                                          |
| K2660 | Tib_8 | Kangma, Shigatse | H2       | 146, 263, 310, 750, 1438, 3106N, 4769, 8281-8289d, 8860, 13314, 14022, 15326, 16172, 16186, 16519                                                                                                                                                                                                                                                          |
| K2865 | Tib_8 | Kangma, Shigatse | M10a1b   | 73, 263, 310, 489, 573+XC, 709, 750, 1438, 2706, 3106N, 3172+C, 4140, 4769, 5393, 7028, 7250, 8701, 8793, 8856, 8860, 9540, 10398, 10400, 10646, 10873, 11719, 12549, 12705, 13152, 13759, 14502, 14766, 14783, 15040, 15043, 15071, 15218, 15301, 15326, 16066, 16223, 16311                                                                              |
| K2512 | Tib_8 | Kangma, Shigatse | M11a     | 73, 198, 200, 215, 263, 309+C, 315+C, 318, 326, 489, 750, 1095, 1438, 2706, 3106N, 4069, 4769, 5993, 6531, 7028, 7642, 8108, 8701, 8860, 9540, 9950, 10398, 10400, 10873, 11719, 11969, 12705, 13074, 14340, 14766, 14783, 15043, 15301, 15326, 16223, 16320                                                                                               |
| K2441 | Tib_8 | Kangma, Shigatse | M9a1b1c  | 73, 150, 152, 153, 263, 310, 489, 750, 1041, 1438, 2706, 3106N, 3394, 4491, 4769, 7028, 8701, 8860, 9540, 10398, 10400, 10454, 10873, 11719, 12362, 12705, 14308, 14766, 14783, 15043, 15301, 15326, 15671, 16158, 16223, 16234, 16362, 16519                                                                                                              |
| K2315 | Tib_8 | Kangma, Shigatse | M9a1b1c  | 73, 150, 152, 153, 183, 263, 309+C, 315+C, 489, 750, 1041, 1438, 2706, 3106N, 3394, 4491, 4769, 7028, 8701, 8860, 9540, 10398, 10400, 10454, 10873, 11719, 12362, 12705, 14308, 14766, 14783, 15043, 15301, 15326, 15671, 16158, 16223, 16234, 16362, 16519                                                                                                |
| K2508 | Tib_8 | Kangma, Shigatse | Z3a1a    | 73, 152, 189, 204, 207, 249d, 263, 309+C, 315+C, 489, 524+AC, 573+XC, 750, 1438, 2706, 3106N, 4715, 4769, 6752, 7028, 7196A, 7702, 8584, 8701, 8860, 8931, 9090, 9540, 9713, 10208, 10398, 10400, 10873, 11075, 11719, 12705, 13359, 13620, 14766, 14783, 14841, 15043, 15301, 15487T, 15784, 15928, 16185, 16223, 16260                                   |
| K2167 | Tib_8 | Kangma, Shigatse | A21a     | 73, 152, 235, 263, 310, 663, 750, 1438, 1736, 2706, 3106N, 4248, 4769, 4824, 7028, 8794, 8860, 11719, 12705, 14364, 14766, 15326, 16092, 16167, 16223, 16290, 16319, 16362                                                                                                                                                                                 |
| K2188 | Tib_8 | Kangma, Shigatse | A        | 73, 152, 235, 263, 309+C, 315+C, 523-524d, 663, 750, 1438, 1736, 2706, 3106N, 4248, 4769, 4824, 7028, 7073, 8794, 8860, 11699, 11719, 12705, 14766, 15326, 16223, 16290, 16319, 16362                                                                                                                                                                      |
| K2926 | Tib_8 | Kangma, Shigatse | A21b1a   | 66T, 73, 152, 235, 263, 309+C, 315+C, 663, 750, 1438, 1736, 2706, 3106N, 4248, 4769, 4824, 7028, 8794, 8860, 11719, 12705, 13934, 12990, 14766, 15326, 16092, 16223, 16290, 16319, 16362                                                                                                                                                                   |
| K2862 | Tib_8 | Kangma, Shigatse | A21b     | 73, 152, 235, 263, 309+C, 315+C, 663, 750, 1438, 1736, 2706, 3106N, 4248, 4769, 4824, 6260, 7028, 8794, 8860, 11719, 12705, 13934, 14364, 14766, 15326, 16223, 16290, 16319, 16362                                                                                                                                                                         |
| K2192 | Tib_8 | Kangma, Shigatse | B4a      | 73, 263, 309+CC, 315+C, 523-524d, 750, 1438, 2706, 3106N, 3396, 4769, 5465, 7028, 8281-8289d, 8860, 9123, 11719, 12634, 13810, 14766, 15326, 16182C, 16183C, 16189, 16217, 16219, 16261, 16286, 16519                                                                                                                                                      |
| K2477 | Tib_8 | Kangma, Shigatse | F1c1a1a2 | 73, 143, 152, 249d, 263, 309+C, 315+C, 523-524d, 573+XC, 709, 750, 1438, 2706, 3106N, 3970, 4769, 6392, 6599, 6962, 7028, 8860, 9053, 9647, 10310, 10454, 10609, 10739, 11719, 12406, 12882, 13759, 13928C, 14766, 15326, 16094, 16111, 16129, 16266, 16304, 16519                                                                                         |
| K2858 | Tib_8 | Kangma, Shigatse | M62a1a1  | 73, 146, 150, 263, 489, 524+AC, 709, 750, 1438, 2706, 2735, 3106N, 3511, 4561, 4763, 4769, 7028, 7664, 8149, 8701, 8860, 9540, 9935, 10398, 10400, 10873, 11719, 12705, 13708, 14766, 14783, 15043, 15301, 15326, 15510, 15520, 15629, 15721, 16147, 16183C, 16189, 16193+C, 16215, 16223, 16295, 16452, 16487, 16491, 16519                               |

|       |       |                  |               |                                                                                                                                                                                                                                                                                                                                                |
|-------|-------|------------------|---------------|------------------------------------------------------------------------------------------------------------------------------------------------------------------------------------------------------------------------------------------------------------------------------------------------------------------------------------------------|
| K2577 | Tib_8 | Kangma, Shigatse | M9a1a1c1b1a13 | 73, 263, 309+C, 315+C, 489, 711, 750, 1041, 1438, 2706, 3106N, 3394, 3866, 4491, 4769, 5899+XC, 7028, 7142, 7697, 8701, 8860, 9242, 9540, 10398, 10400, 10873, 11719, 12705, 13725, 14308, 14417, 14766, 14783, 15043, 15301, 15326, 15634, 16194, 16223, 16234, 16316, 16362                                                                  |
| K2437 | Tib_8 | Kangma, Shigatse | M9a1b2        | 73, 150, 152, 153, 263, 309+C, 315+C, 489, 750, 1041, 1438, 2706, 3106N, 3394, , 4491, 4769, 5592, 5899+XC, 7028, 8701, 8860, 9540, 10398, 10400, 10873, 10951A, 11719, 12362, 12705, 14308, 14766, 14783, 15043, 15301, 15326, 15671, 16223, 16362, 16519                                                                                     |
| K2443 | Tib_8 | Kangma, Shigatse | F1b1          | 73, 249d, 263, 310, 523-524d, 750, 1438, 2706, 2757, 3106N, 3970, 4732, 4769, 5147, 6392, 6962, 7028, 8860, 10310, 10609, 10976, 11719, 12406, 12633, 12882, 13444G, 13928C, 14476, 14766, 15326, 16183C, 16189, 16232A, 16249, 16311, 16519                                                                                                   |
| K2189 | Tib_8 | Kangma, Shigatse | M9a1a1c1b1a   | 73, 263, 309+CC, 315+C, 489, 711, 750, 1041, 1438, 2706, 3106N, 3394, 4491, 4769, 5894C, 5899+XC, 7028, 7142, 7697, 8701, 8860, 9242, 9540, 10398, 10400, 10873, 11719, 12705, 14308, 14417, 14766, 14783, 15043, 15301, 15326, 16223, 16234, 16316, 16362                                                                                     |
| K3592 | Tib_9 | Lazi, Shigatse   | G2a1h         | 73, 263, 309+C, 315+C, 489, 593, 709, 750, 1438, 2404, 2706, 3106N, 3158+T, 3777, 4769, 5108, 5601, 7028, 7600, 8307, 8701, 8860, 9377, 9540, 9575, 10398, 10400, 10873, 11719, 12705, 13194, 13563, 14200, 14569, 14766, 14783, 15043, 15301, 15326, 16223, 16227, 16278, 16362                                                               |
| K3541 | Tib_9 | Lazi, Shigatse   | A11a1a        | 73, 152, 235, 263, 310, 523-524d, 663, 750, 1005, 1438, 1736, 2706, 3106N, 4248, 4769, 4824, 5899+XC, 6755, 7028, 8281-8289d, 8794, 8843, 8860, 9145, 9650, 11719, 12705, 14766, 15326, 16093, 16223, 16290, 16293C, 16294, 16319, 16527                                                                                                       |
| K3371 | Tib_9 | Lazi, Shigatse   | C4a2c         | 73, 214, 249d, 263, 310, 489, 750, 1438, 2232+A, 2706, 3106N, 3552A, 3565, 4216, 4715, 4769, 6026, 6647, 7028, 7196A, 7664, 8062, 8584, 8701, 8860, 9540, 9545, 10398, 10400, 10873, 11719, 11914, 11969, 12672, 12705, 13263, 13967, 14318, 14766, 14783, 15043, 15204, 15301, 15326, 15487T, 16223, 16298, 16327, 16357, 16519               |
| K3302 | Tib_9 | Lazi, Shigatse   | A21b1         | 73, 152, 235, 263, 310, 663, 750, 1438, 1736, 2706, 3106N, 4248, 4769, 4824, 7028, 8794, 8860, 11719, 12705, 13934, 14364, 14766, 15326, 16092, 16223, 16290, 16319, 16362                                                                                                                                                                     |
| K3296 | Tib_9 | Lazi, Shigatse   | A15c2         | 73, 152, 153, 235, 310, 523-524d, 663, 750, 1438, 1736, 2706, 3106N, 4248, 4769, 4824, 7028, 8459, 8794, 8860, 9052, 11719, 12705, 13111, 14067, 14766, 15262, 15326, 16223, 16290, 16319, 16362                                                                                                                                               |
| K3293 | Tib_9 | Lazi, Shigatse   | A21b1         | 73, 152, 235, 263, 310, 663, 750, 1438, 1736, 2706, 3106N, 4248, 4769, 4824, 7028, 8794, 8860, 9142, 11719, 12705, 13934, 14364, 14766, 15326, 16092, 16223, 16290, 16319, 16362                                                                                                                                                               |
| K3111 | Tib_9 | Lazi, Shigatse   | M9a1a1c1b1a   | 73, 263, 309+CC, 315+C, 489, 711, 750, 1041, 1438, 2706, 3106N, 3394, 4491, 4769, 5605, 5899+XC, 7028, 7142, 7352, 7697, 8701, 8860, 9242, 9540, 10398, 10400, 10873, 11719, 12705, 13943, 14308, 14417, 14766, 14783, 15043, 15301, 15326, 16223, 16234, 16316, 16362                                                                         |
| K3110 | Tib_9 | Lazi, Shigatse   | M9a1a1c1b1a12 | 73, 263, 309+C, 315+C, 489, 711, 750, 1041, 1438, 2706, 3106N, 3394, 4491, 4769, 5899+XC, 7028, 7142, 7697, 8701, 8860, 9242, 9540, 10398, 10400, 10873, 11719, 12705, 14308, 14417, 14766, 14783, 15043, 15301, 15326, 15440, 16114G, 16223, 16234, 16316, 16362                                                                              |
| K2742 | Tib_9 | Lazi, Shigatse   | T1a1          | 73, 152, 195, 263, 709, 750, 1438, 1888, 2706, 3106N, 4216, 4769, 4917, 7028, 8697, 8860, 9899, 10463, 11251, 11719, 12633A, 13368, 14766, 14905, 15326, 15452A, 15607, 15928, 16126, 16163, 16186, 16189, 16294, 16519                                                                                                                        |
| K2685 | Tib_9 | Lazi, Shigatse   | M13a2         | 73, 152, 263, 309+C, 315+C, 489, 513, 750, 1438, 2706, 2786, 3105, 3106N, 3644, 4769, 5773, 6023, 6253, 6620, 7028, 8405, 8701, 8860, 9540, 10373, 10398, 10400, 10411, 10790, 10873, 11719, 12705, 13395, 14766, 14783, 15043, 15301, 15326, 15924, 15944d, 16145, 16168, 16188, 16189, 16223, 16257, 16311, 16519                            |
| K2684 | Tib_9 | Lazi, Shigatse   | U2c1          | 73, 125, 127, 128, 152, 263, 310, 523-524d, 750, 1438, 1811, 2706, 3106N, 3796, 4769, 5790A, 7028, 7853, 8023, 8676, 8860, 9156, 9767, 10682T, 11467, 11719, 12308, 12372, 13488, 14766, 14935, 15061, 15326, 16051, 16093, 16220, 16234, 16247, 16311, 16519, 16527                                                                           |
| K3607 | Tib_9 | Lazi, Shigatse   | C4a2c3        | 47, 73, 214, 249d, 263, 309+C, 315+C, 489, 750, 1438, 2232+A, 2706, 3106N, 3552A, 3565, 4715, 4769, 6026, 6647, 7028, 7196A, 7664, 8062, 8584, 8701, 8860, 9540, 9545, 10398, 10400, 10873, 11719, 11914, 11969, 12672, 12705, 13263, 13967, 14318, 14693, 14766, 14783, 15043, 15204, 15301, 15326, 15487T, 16223, 16298, 16327, 16357, 16519 |
| K3606 | Tib_9 | Lazi, Shigatse   | D4o2a         | 73, 195, 263, 309+C, 315+C, 489, 750, 1438, 2706, 3010, 3106N, 3789, 4769, 4883, 5178A, 7028, 8414, 8701, 8860, 9077, 9540, 10398, 10400, 10646, 10873, 11719, 12705, 13812, 14668, 14766, 14783, 15043, 15301, 15326, 16093, 16223, 16232, 16290, 16362, 16519                                                                                |
| K3602 | Tib_9 | Lazi, Shigatse   | F1d1a1        | 73, 146, 249d, 263, 309+C, 315+C, 523-524d, 750, 1438, 1734, 2706, 3106N, 3970, 4769, 5628, 6392, 6962, 7028, 7738, 8860, 8994, 10310, 10609, 11719, 12007, 12406, 12882, 13135, 13928C, 14766, 15326, 15402, 16265C, 16284, 16304, 16519                                                                                                      |
| K3600 | Tib_9 | Lazi, Shigatse   | F1c1a1a       | 73, 151, 152, 249d, 263, 309+C, 315+C, 523-524d, 573+XC, 709, 750, 1438, 2706, 3106N, 3970, 4769, 6392, 6599, 6962, 7028, 8860, 9053, 9647, 10310, 10454, 10609, 11719, 12406, 12882, 13759, 13928C, 14766, 15326, 16111, 16129, 16266, 16304, 16519                                                                                           |

|       |       |                   |               |                                                                                                                                                                                                                                                                                                                                                 |
|-------|-------|-------------------|---------------|-------------------------------------------------------------------------------------------------------------------------------------------------------------------------------------------------------------------------------------------------------------------------------------------------------------------------------------------------|
| K3599 | Tib_9 | Lazi,<br>Shigatse | M9a1a1c1b1a13 | 54C, 73, 263, 310, 489, 711, 750, 1041, 1438, 2706, 3106N, 3394, 3866, 4491, 4769, 5899+XC, 7028, 7142, 7697, 8701, 8860, 9242, 9540, 10398, 10400, 10873, 11719, 12705, 14308, 14417, 14766, 14783, 15043, 15301, 15326, 16155, 16223, 16234, 16316, 16362                                                                                     |
| K3591 | Tib_9 | Lazi,<br>Shigatse | M33a1a        | 73, 195, 263, 309+C, 315+C, 489, 573+XC, 750, 1438, 2361, 2706, 3106N, 4769, 7028, 8562, 8572, 8701, 8860, 9540, 10398, 10400, 10873, 11719, 12153, 12705, 14053, 14766, 14783, 15043, 15052, 15301, 15326, 15466, 15862, 15908, 16223, 16294, 16519                                                                                            |
| K3551 | Tib_9 | Lazi,<br>Shigatse | C4a2b2        | 73, 194, 249d, 263, 489, 750, 1438, 1677, 2232+A, 2706, 2887, 3106N, 3552A, 4696, 4715, 4769, 6026, 7028, 7196A, 8584, 8701, 8860, 9540, 9545, 10304, 10398, 10400, 10873, 11719, 11914, 11969, 12624, 12672, 12705, 13263, 14318, 14766, 14783, 15043, 15204, 15301, 15326, 15487T, 16223, 16298, 16311, 16327, 16357, 16519                   |
| K3548 | Tib_9 | Lazi,<br>Shigatse | C7a1          | 73, 146, 153, 249d, 263, 309+C, 315+C, 489, 750, 1438, 2706, 3106N, 3552A, 3918, 4715, 4769, 5790, 5821, 6338, 6524, 7028, 7196A, 7853, 8584, 8701, 8860, 9540, 9545, 10398, 10400, 10873, 11719, 11914, 12705, 12957, 13263, 14318, 14766, 14783, 14978, 15043, 15301, 15326, 15487T, 16223, 16239, 16298, 16327, 16519                        |
| K3545 | Tib_9 | Lazi,<br>Shigatse | A21b1a        | 63, 64, 66T, 73, 152, 235, 263, 309+C, 315+C, 663, 750, 1047, 1438, 1736, 2706, 3106N, 4248, 4769, 4824, 7028, 8794, 8860, 11719, 12705, 13934, 14364, 14766, 15326, 16092, 16223, 16290, 16319, 16362                                                                                                                                          |
| K3542 | Tib_9 | Lazi,<br>Shigatse | A15c2         | 73, 152, 235, 309+CC, 315+C, 523-524d, 663, 750, 1438, 1736, 2706, 3106N, 4226, 4248, 4769, 4824, 7028, 8459, 8794, 8860, 9052, 11719, 12705, 13111, 14067, 14766, 15262, 15326, 16223, 16290, 16295, 16319, 16362                                                                                                                              |
| K3300 | Tib_9 | Lazi,<br>Shigatse | M62a1a        | 73, 146, 150, 263, 489, 750, 1438, 2706, 2735, 3106N, 3511, 4561, 4763, 4769, 7028, 7664, 8149, 8701, 8860, 9540, 9935, 10398, 10400, 10873, 11719, 12705, 13708, 14766, 14783, 15043, 15301, 15326, 15510, 15520, 15629, 15721, 16147, 16223, 16284, 16295, 16368, 16452, 16484, 16487, 16491, 16519                                           |
| K2973 | Tib_9 | Lazi,<br>Shigatse | M13a2a1d      | 73, 152, 263, 310, 489, 513, 750, 1393, 1438, 2706, 2786, 3106N, 3644, 4769, 5773, 6023, 6253, 6620, 7028, 8405, 8701, 8860, 9540, 10373, 10398, 10400, 10411, 10790, 10873, 11719, 12705, 13395, 14766, 14783, 15043, 15301, 15326, 15334, 15924, 15944d, 16145, 16168, 16188, 16223, 16257, 16311, 16519                                      |
| K2743 | Tib_9 | Lazi,<br>Shigatse | D4j1a1c       | 73, 263, 310, 489, 750, 1438, 2706, 3010, 3106N, 3397, 4769, 4883, 5178A, 5262, 7028, 7581, 7783, 8414, 8701, 8860, 9540, 10398, 10400, 10873, 11696, 11719, 12130, 12358, 12705, 14668, 14766, 14783, 15043, 15295, 15301, 15326, 15884, 16086, 16223, 16362                                                                                   |
| K2748 | Tib_9 | Lazi,<br>Shigatse | F1c1a1a3      | 73, 152, 249d, 263, 309+C, 315+C, 523-524d, 573+XC, 709, 750, 1438, 2706, 3106N, 3970, 4769, 6392, 6599, 6962, 7028, 8860, 9053, 9389, 9647, 10310, 10454, 10609, 11719, 12406, 12882, 13759, 13928C, 14766, 15326, 15758, 16111, 16129, 16266, 16304, 16362, 16519                                                                             |
| K3108 | Tib_9 | Lazi,<br>Shigatse | D6a1          | 73, 263, 309+C, 315+C, 489, 709, 750, 1438, 1719, 2706, 3106N, 3714, 4769, 4883, 5178A, 6701, 7028, 7424, 7879, 8701, 8860, 9540, 10398, 10400, 10873, 11719, 12654, 12705, 13194, 14766, 14783, 15043, 15301, 15326, 16189, 16193+TC, 16223, 16274, 16362                                                                                      |
| K2971 | Tib_9 | Lazi,<br>Shigatse | M9a1a1c1b1a   | 73, 263, 309+C, 315+C, 489, 711, 750, 1041, 1438, 2706, 3106N, 3394, 4491, 4769, 5899+XC, 5978, 7028, 7142, 7697, 8701, 8860, 9242, 9540, 10398, 10400, 10873, 11719, 12705, 14308, 14417, 14766, 14783, 15043, 15301, 15326, 16223, 16234, 16316, 16362                                                                                        |
| K3543 | Tib_9 | Lazi,<br>Shigatse | B4c1b2c2      | 73, 150, 263, 309+C, 315+C, 709, 750, 1119, 1438, 2706, 3106N, 3435, 3497, 3571, 4769, 7028, 8281-8289d, 8860, 9128, 9770, 11204, 11440, 11719, 14311, 14766, 14945, 15326, 15346, 16051, 16129, 16140, 16166, 16186+T, 16189, 16217, 16274, 16335, 16519                                                                                       |
| K3605 | Tib_9 | Lazi,<br>Shigatse | C4a1a1a2      | 73, 249d, 263, 310, 489, 750, 1438, 1715, 2232+AA, 2706, 3106N, 3552A, 3576, 4715, 4769, 4884, 4958, 5918, 6026, 7028, 7196A, 7999, 8508, 8584, 8701, 8860, 9540, 9545, 10398, 10400, 10873, 11719, 11914, 11969, 12672, 12705, 13263, 14318, 14766, 14783, 15043, 15204, 15301, 15326, 15487T, 15968, 16093, 16129, 16223, 16298, 16327, 16519 |
| K3109 | Tib_9 | Lazi,<br>Shigatse | C4a2c3        | 47, 73, 214, 249d, 263, 309+C, 315+C, 489, 750, 1438, 2232+A, 2706, 3106N, 3552A, 3565, 4715, 4769, 6026, 6647, 7028, 7196A, 7664, 8062, 8584, 8701, 8860, 9540, 9545, 10398, 10400, 10873, 11719, 11914, 11969, 12672, 12705, 13263, 13967, 14318, 14693, 14766, 14783, 15043, 15204, 15301, 15326, 15487T, 16223, 16298, 16327, 16357, 16519  |
| K3294 | Tib_9 | Lazi,<br>Shigatse | C4d2          | 73, 152, 207, 249d, 263, 310, 489, 750, 1438, 2706, 3106N, 3552A, 4715, 4769, 6026, 6261, 7028, 7100, 7196A, 8584, 8701, 8860, 9540, 9545, 10398, 10400, 10873, 10915, 11719, 11914, 11969, 12705, 12780, 13263, 14318, 14766, 14783, 15043, 15204, 15236, 15301, 15326, 15487T, 16093, 16298, 16327, 16519                                     |
| K3842 | Tib_9 | Lazi,<br>Shigatse | D4j1a1        | 73, 263, 310, 489, 750, 1438, 2706, 3010, 3106N, 4769, 4883, 5178A, 5262, 6383, 7028, 7375, 7581, 7783, 8414, 8701, 8860, 9053, 9540, 10398, 10400, 10873, 10933, 11696, 11719, 11963, 12130, 12358, 12705, 14668, 14766, 14783, 15043, 15295, 15301, 15326, 16086, 16223, 16362                                                                |
| K3549 | Tib_9 | Lazi,<br>Shigatse | F1d1a2a       | 73, 146, 234, 249d, 263, 309+C, 315+C, 523-524d, 750, 1438, 1734, 2706, 3106N, 3970, 4058A, 4769, 5628, 6392, 6962, 7028, 7738, 8860, 10310, 10609, 11719, 12406, 12882, 13135, 13928C, 14766, 15326, 15402, 16145, 16183C, 16189, 16255, 16284, 16304, 16519                                                                                   |

|       |       |                   |             |                                                                                                                                                                                                                                                                                                                       |
|-------|-------|-------------------|-------------|-----------------------------------------------------------------------------------------------------------------------------------------------------------------------------------------------------------------------------------------------------------------------------------------------------------------------|
| K3597 | Tib_9 | Lazi,<br>Shigatse | G2b1b2      | 73, 263, 309+CC, 315+C, 489, 709, 750, 1438, 2706, 3106N, 3975, 4769, 4833, 4853, 5108, 5601, 7028, 8701, 8860, 8877, 9540, 10398, 10400, 10873, 11719, 12375, 12705, 12795, 13563, 14563G, 14569, 14766, 14783, 15043, 15301, 15326, 16223, 16362                                                                    |
| K3754 | Tib_9 | Lazi,<br>Shigatse | M9a1a1c1bla | 73, 263, 309+C, 315+C, 489, 711, 750, 1041, 1438, 2706, 3106N, 3394, 4491, 4769, 5899+XC, 7028, 7142, 7371, 7697, 8701, 8860, 9242, 9540, 10398, 10400, 10873, 11719, 12705, 14308, 14417, 14766, 14783, 15043, 15301, 15326, 16148, 16223, 16234, 16274, 16316, 16362                                                |
| K3753 | Tib_9 | Lazi,<br>Shigatse | M9a1a1c1bla | 73, 263, 309+C, 315+C, 489, 711, 750, 1041, 1438, 2706, 3106N, 3394, 4491, 4769, 5899+XC, 7028, 7142, 7697, 8701, 8860, 9242, 9540, 10398, 10400, 10873, 11719, 12705, 14308, 14417, 14766, 14783, 15043, 15301, 15326, 16223, 16234, 16316, 16362                                                                    |
| K3546 | Tib_9 | Lazi,<br>Shigatse | M9a1a1c1bla | 73, 263, 309+C, 315+C, 489, 711, 750, 1041, 1438, 2706, 3106N, 3394, 4491, 4769, 5899+XC, 7028, 7142, 7697, 8701, 8860, 9242, 9540, 10398, 10400, 10873, 11719, 12705, 14308, 14417, 14766, 14783, 15043, 15301, 15326, 16129, 16223, 16234, 16316, 16362                                                             |
| K3595 | Tib_9 | Lazi,<br>Shigatse | M9a1b2      | 73, 150, 152, 153, 263, 309+CC, 315+C, 489, 750, 1041, 1438, 2706, 3106N, 3394, 4491, 4769, 7028, 8701, 8860, 9540, 10398, 10400, 10873, 10951A, 11719, 12362, 12705, 14308, 14766, 14783, 15043, 15301, 15326, 15671, 16158, 16223, 16234, 16362, 16519                                                              |
| K3755 | Tib_9 | Lazi,<br>Shigatse | M9a1b1c     | 73, 150, 152, 153, 183, 263, 310, 489, 750, 1041, 1438, 2706, 3106N, 3394, 4491, 4769, 7028, 8701, 8860, 9540, 10398, 10400, 10454, 10873, 11719, 12362, 12705, 14308, 14766, 14783, 15043, 15301, 15326, 15671, 16158, 16223, 16234, 16362, 16519                                                                    |
| K3604 | Tib_9 | Lazi,<br>Shigatse | A14a        | 73, 151, 152, 200, 235, 263, 310, 523-524d, 663, 735, 750, 1438, 1736, 2706, 3106N, 4248, 4769, 4824, 6272, 7028, 8334, 8640, 8794, 8860, 11719, 12004, 12468, 12705, 12990, 14766, 15326, 16093, 16223, 16290, 16319, 16362, 16519                                                                                   |
| K2456 | Tib_9 | Lazi,<br>Shigatse | C4b1        | 73, 146, 249d, 263, 310, 489, 750, 1438, 2232+A, 2706, 3106N, 3552A, 3816, 4715, 4769, 6026, 7028, 7196A, 8251, 8584, 8701, 8860, 9540, 9545, 10398, 10400, 10873, 11719, 11914, 11969, 12705, 13263, 14318, 14766, 14783, 15043, 15204, 15301, 15326, 15487T, 16129, 16223, 16298, 16327, 16519                      |
| K3603 | Tib_9 | Lazi,<br>Shigatse | C4d2        | 73, 152, 249d, 263, 310, 489, 750, 1438, 2706, 3106N, 3552A, 4715, 4769, 6026, 7028, 7100, 7196A, 8584, 8701, 8860, 9540, 9545, 10398, 10400, 10873, 11719, 11914, 11969, 12705, 12780, 13263, 14318, 14488, 14766, 14783, 15043, 15204, 15236, 15301, 15326, 15487T, 16093, 16298, 16327, 16519                      |
| K3608 | Tib_9 | Lazi,<br>Shigatse | D4s1a       | 73, 199, 263, 309+C, 315+C, 489, 524+AC, 750, 813, 1438, 2706, 3010, 3106N, 4769, 4883, 5178A, 7028, 8414, 8701, 8860, 9540, 10398, 10400, 10873, 11719, 12662, 12705, 13707, 14668, 14766, 14783, 15043, 15301, 15326, 15734, 16223, 16319, 16362, 16519                                                             |
| K3370 | Tib_9 | Lazi,<br>Shigatse | D4s1a       | 73, 199, 263, 309+C, 315+C, 489, 524+AC, 750, 813, 1438, 2706, 3010, 3106N, 4769, 4883, 5178A, 7028, 8414, 8701, 8860, 9540, 10398, 10400, 10873, 11719, 12662, 12705, 14668, 14766, 14783, 15043, 15301, 15326, 15734, 16223, 16319, 16362, 16519                                                                    |
| K3756 | Tib_9 | Lazi,<br>Shigatse | G2a1f       | 73, 263, 309+CC, 315+C, 489, 709, 750, 1438, 2706, 3106N, 4769, 4833, 5108, 5601, 7028, 7600, 8701, 8860, 9377, 9540, 9575, 9659, 10398, 10400, 10873, 11719, 12705, 13563, 13884, 14200, 14569, 14766, 14783, 15043, 15301, 15326, 16051, 16114, 16223, 16227, 16278, 16291, 16362                                   |
| K3601 | Tib_9 | Lazi,<br>Shigatse | G3a1a2      | 16T, 73, 143, 150, 263, 309+C, 315+C, 489, 709, 750, 1438, 2706, 3106N, 4769, 4833, 5108, 7028, 8255, 8701, 8860, 8861, 9540, 10398, 10400, 10873, 11719, 11914, 12705, 14569, 14766, 14783, 15043, 15301, 15326, 15746, 16148, 16153, 16215, 16223, 16274                                                            |
| K2680 | Tib_9 | Lazi,<br>Shigatse | G3a1a       | 16T, 73, 143, 150, 182, 263, 310, 489, 709, 750, 1438, 2706, 3106N, 4769, 4833, 5108, 7028, 8701, 8860, 8861, 8887, 9540, 10398, 10400, 10873, 11719, 11914, 12705, 14569, 14766, 14783, 15043, 15301, 15326, 15746, 16215, 16223, 16274                                                                              |
| K2679 | Tib_9 | Lazi,<br>Shigatse | G3b1        | 73, 195, 200, 215, 263, 310, 489, 709, 750, 1438, 2706, 3106N, 4769, 4833, 5108, 7028, 7897, 8701, 8860, 9540, 9599, 10398, 10400, 10873, 11719, 12705, 13477, 14094, 14569, 14605, 14766, 14783, 15043, 15301, 15326, 15927, 16223, 16274, 16362                                                                     |
| K3835 | Tib_9 | Lazi,<br>Shigatse | HV19        | 263, 309+C, 315+C, 750, 1438, 2706, 3106N, 4769, 4823, 5585, 7028, 8860, 15326, 16260, 16399                                                                                                                                                                                                                          |
| K2455 | Tib_9 | Lazi,<br>Shigatse | M62b1a1     | 73, 143, 150, 203, 204, 263, 309+C, 315+C, 489, 750, 1438, 2706, 2735, 3106N, 3511, 4561, 4769, 7028, 7664, 7844, 8149, 8281-8289d, 8701, 8860, 9540, 10398, 10400, 10873, 10978, 11431, 11719, 12705, 13708, 14766, 14783, 15043, 15301, 15326, 15510, 15520, 15629, 15721, 15751, 16086, 16169, 16223, 16260, 16519 |
| K3149 | Tib_9 | Lazi,<br>Shigatse | M9a1a1c1bla | 73, 263, 309+CC, 315+C, 489, 711, 750, 1041, 1438, 2706, 3106N, 3394, 4136, 4491, 4769, 5899+XC, 7028, 7142, 7697, 8701, 8860, 9242, 9540, 10398, 10400, 10873, 11719, 12705, 14308, 14417, 14766, 14783, 15043, 15301, 15326, 16223, 16234, 16316, 16362                                                             |
| K2683 | Tib_9 | Lazi,<br>Shigatse | M9a1a1c1bla | 73, 263, 310, 489, 711, 750, 1041, 1438, 2706, 3106N, 3394, 4491, 4769, 5899+XC, 7028, 7142, 7697, 8701, 8860, 9242, 9540, 10398, 10400, 10873, 11719, 12705, 14308, 14417, 14766, 14783, 15043, 15301, 15326, 16051, 16223, 16234, 16316, 16362                                                                      |
| K2745 | Tib_9 | Lazi,<br>Shigatse | Z3a1a       | 73, 152, 189, 204, 207, 249d, 263, 309+C, 315+C, 489, 573+XC, 750, 1438, 2706, 3106N, 4715, 4769, 6752, 7028, 7196A, 7702, 8584, 8701, 8860, 8931, 9090, 9540, 9713, 10208, 10398, 10400, 10873, 11075, 11719, 12705, 13359, 13620, 14766, 14783, 14841, 15043, 15301, 15487T, 15784, 15928, 16185, 16223, 16260      |

|       |       |                   |               |                                                                                                                                                                                                                                                                                                                    |
|-------|-------|-------------------|---------------|--------------------------------------------------------------------------------------------------------------------------------------------------------------------------------------------------------------------------------------------------------------------------------------------------------------------|
| K2744 | Tib_9 | Lazi,<br>Shigatse | C7a           | 73, 249d, 263, 310, 489, 750, 1438, 2706, 3106N, 3552A, 4715, 4769, 5821, 6338, 7028, 7153, 7196A, 7853, 8584, 8701, 8860, 9540, 9545, 10398, 10400, 10873, 11719, 11914, 12705, 13263, 14318, 14766, 14783, 15043, 15301, 15326, 15487T, 16223, 16298, 16327, 16362, 16519                                        |
| K2747 | Tib_9 | Lazi,<br>Shigatse | F1g           | 73, 249d, 263, 309+CC, 315+C, 523-524d, 750, 1438, 2389, 2706, 2857, 3106N, 3398, 3483, 3970, 4769, 6392, 6962, 7028, 8854, 8860, 10310, 10609, 11719, 12406, 12882, 13928C, 14766, 15326, 16183C, 16189, 16193+CC, 16304, 16519                                                                                   |
| k3757 | Tib_9 | Lazi,<br>Shigatse | M11a          | 73, 125, 198, 215, 263, 309+C, 315+C, 318, 326, 489, 573+XC, 750, 1095, 1438, 2706, 3106N, 4769, 5582, 6531, 7028, 7642, 8108, 8701, 8860, 9540, 9554, 9950, 10398, 10400, 10873, 10914, 11272, 11719, 11969, 12705, 13074, 14163, 14340, 14766, 14783, 15043, 15301, 15326, 16188, 16223                          |
| K3831 | Tib_9 | Lazi,<br>Shigatse | M9a1a1c1b1a   | 73, 263, 309+CC, 315+C, 489, 711, 750, 1041, 1438, 2706, 3106N, 3394, 4491, 4769, 5899+XC, 7028, 7142, 7697, 8701, 8860, 9242, 9540, 10398, 10400, 10873, 11719, 12705, 14308, 14417, 14766, 14783, 15043, 15301, 15326, 16223, 16234, 16316, 16362                                                                |
| K3839 | Tib_9 | Lazi,<br>Shigatse | M9a1b1c       | 73, 150, 152, 153, 263, 310, 489, 750, 1041, 1438, 2706, 3106N, 3394, 4491, 4769, 7028, 8701, 8860, 9540, 10398, 10400, 10454, 10873, 11719, 12362, 12705, 14308, 14766, 14783, 15043, 15301, 15326, 15671, 16223, 16234, 16256, 16288, 16362, 16519                                                               |
| K3540 | Tib_9 | Lazi,<br>Shigatse | D4j1a1d       | 73, 263, 310, 489, 750, 1189, 1438, 1462, 2706, 3010, 3106N, 4769, 4883, 5178A, 5262, 7028, 7581, 7783, 8414, 8701, 8860, 9540, 10398, 10400, 10873, 11696, 11719, 12130, 12358, 12648, 12705, 14668, 14766, 14783, 15043, 15295, 15301, 15326, 16086, 16223, 16274, 16362, 16519                                  |
| K3840 | Tib_9 | Lazi,<br>Shigatse | F1g2          | 73, 195, 249d, 263, 309+CC, 315+C, 523-524d, 750, 1438, 2389, 2706, 3106N, 3398, 3970, 4769, 6392, 6962, 7028, 8860, 10310, 10609, 11719, 12406, 12882, 13928C, 14766, 15326, 16183C, 16189, 16304, 16519                                                                                                          |
| K3825 | Tib_9 | Lazi,<br>Shigatse | M13a2         | 73, 152, 263, 309+C, 315+C, 489, 513, 750, 1438, 2706, 2786, 3106N, 3644, 4769, 5773, 6023, 6253, 6620, 6719, 7028, 8405, 8701, 8829, 8860, 9540, 10373, 10398, 10400, 10411, 10790, 10873, 11719, 12705, 13395, 14766, 14783, 15043, 15301, 15326, 15924, 15944d, 16145, 16168, 16188, 16223, 16257, 16311, 16519 |
| K3299 | Tib_9 | Lazi,<br>Shigatse | M62a1a        | 73, 146, 150, 263, 489, 750, 1438, 2706, 2735, 3106N, 3511, 4561, 4763, 4769, 7028, 7664, 8149, 8701, 8860, 9540, 9935, 10398, 10400, 10873, 11719, 12705, 13708, 14766, 14783, 15043, 15301, 15326, 15510, 15520, 15629, 15721, 16147, 16223, 16284, 16295, 16368, 16452, 16484, 16487, 16491, 16519              |
| K2682 | Tib_9 | Lazi,<br>Shigatse | A21a          | 73, 152, 235, 263, 310, 663, 750, 1438, 1736, 2706, 3106N, 4248, 4769, 4824, 6354Y, 7028, 8794, 8860, 11719, 12705, 14142, 14364, 14766, 15326, 16092, 16223, 16290, 16319, 16362                                                                                                                                  |
| K3593 | Tib_9 | Lazi,<br>Shigatse | D4j3b1        | 73, 94, 263, 309+C, 315+C, 338, 489, 750, 1438, 2706, 2880, 3010, 3106N, 4769, 4883, 5178A, 7028, 8414, 8701, 8860, 9540, 9630T, 10398, 10400, 10873, 11696, 11719, 12705, 14668, 14766, 14783, 15043, 15301, 15326, 16184, 16223, 16311, 16362                                                                    |
| K3594 | Tib_9 | Lazi,<br>Shigatse | M9a1b1e       | 73, 150, 152, 153, 263, 309+CC, 315+C, 489, 709, 750, 1041, 1438, 2706, 3106N, 3394, 4491, 4769, 7028, 8701, 8860, 9540, 10398, 10400, 10873, 11719, 12362, 12705, 14308, 14766, 14783, 15043, 15301, 15326, 15671, 16051, 16158, 16223, 16234, 16311, 16362, 16519                                                |
| K3550 | Tib_9 | Lazi,<br>Shigatse | G3b3          | 73, 152, 263, 315+C, 489, 524+AC, 709, 750, 1438, 2706, 2967, 3106N, 3394, 4113, 4769, 4833, 5108, 7028, 8701, 8860, 9540, 10398, 10400, 10873, 11719, 12705, 13477, 14569, 14605, 14766, 14783, 15043, 15301, 15326, 15927, 16209, 16223, 16274, 16362                                                            |
| K2699 | Tib_9 | Lazi,<br>Shigatse | M9a1a1c1b1a13 | 73, 182, 263, 309+C, 315+C, 489, 711, 750, 1041, 1438, 2706, 3106N, 3394, 3866, 4491, 4769, 5474, 5899+XC, 7028, 7142, 7697, 8701, 8860, 9242, 9540, 10398, 10400, 10873, 11719, 12705, 14308, 14417, 14766, 14783, 15043, 15301, 15326, 16223, 16234, 16316, 16362                                                |
| K2972 | Tib_9 | Lazi,<br>Shigatse | B4d1'2'3      | 73, 263, 310, 750, 827, 1438, 2706, 3106N, 4769, 7028, 8116, 8281-8289d, 8860, 11719, 11914, 13942, 14766, 15326, 15535, 15930, 16183C, 16189, 16217, 16234, 16519                                                                                                                                                 |
| K3827 | Tib_9 | Lazi,<br>Shigatse | A11a1a        | 73, 151, 152, 235, 263, 309+C, 315+C, 523-524d, 663, 750, 1005, 1438, 1736, 2706, 3106N, 4248, 4769, 4824, 5899+XC, 6755, 7028, 8794, 8843, 8860, 9650, 11719, 12705, 14766, 15326, 16093, 16223, 16290, 16293C, 16319                                                                                             |
| K3301 | Tib_9 | Lazi,<br>Shigatse | A11a1a        | 73, 152, 235, 263, 309+C, 315+C, 523-524d, 663, 750, 1005, 1438, 1736, 2706, 3106N, 3918, 4248, 4769, 4824, 5768, 5899+XC, 6755, 7028, 8794, 8843, 8860, 9650, 11719, 12705, 14766, 15326, 16223, 16290, 16293C, 16319                                                                                             |
| K3829 | Tib_9 | Lazi,<br>Shigatse | A6b           | 73, 146, 152, 235, 263, 310, 523-524d, 654, 663, 750, 1438, 1736, 2706, 3106N, 3687, 4248, 4769, 4824, 6707, 7028, 8531, 8794, 8860, 10097, 10993, 11719, 12705, 13287, 14766, 15326, 15670, 16223, 16290, 16319, 16362                                                                                            |
| K2681 | Tib_9 | Lazi,<br>Shigatse | M10a1b        | 73, 263, 310, 489, 573+XC, 709, 750, 1438, 2706, 3106N, 3172+C, 4140, 4769, 7028, 7250, 8701, 8793, 8856, 8860, 9540, 10398, 10400, 10646, 10873, 11719, 12549, 12705, 13152, 14502, 14766, 14783, 15040, 15043, 15071, 15218, 15301, 15326, 15913, 15927, 16066, 16150, 16223, 16311                              |
| K3843 | Tib_9 | Lazi,<br>Shigatse | M9a1a1c1b1a2  | 73, 146, 263, 309+CC, 315+C, 489, 711, 750, 1041, 1438, 2706, 3106N, 3394, 4491, 4769, 5899+XC, 6446, 7028, 7142, 7697, 8701, 8860, 9242, 9540, 10398, 10400, 10873, 11719, 12705, 14308, 14417, 14766, 14783, 15043, 15301, 15326, 16223, 16234, 16316, 16362                                                     |

|       |        |                      |              |                                                                                                                                                                                                                                                                                                                                                                |
|-------|--------|----------------------|--------------|----------------------------------------------------------------------------------------------------------------------------------------------------------------------------------------------------------------------------------------------------------------------------------------------------------------------------------------------------------------|
| K3298 | Tib_9  | Lazi,<br>Shigatse    | H14          | 263, 309+CC, 315+C, 750, 1438, 3106N, 3197, 4769, 6570T, 7645, 7990, 8860, 10217, 10685, 15326                                                                                                                                                                                                                                                                 |
| K3834 | Tib_9  | Lazi,<br>Shigatse    | M9a1a1c1b1a  | 73, 263, 309+CC, 315+C, 489, 711, 750, 1041, 1438, 2706, 3106N, 3394, 4491, 4769, 5899+XC, 7028, 7142, 7697, 8701, 8860, 9242, 9540, 10398, 10400, 10873, 11719, 12705, 14308, 14417, 14766, 14783, 15043, 15301, 15326, 16223, 16234, 16316, 16362                                                                                                            |
| K3508 | Tib_10 | Zhongba,<br>Shigatse | M9a1b1c      | 73, 150, 152, 153, 263, 309+CC, 315+C, 489, 750, 1041, 1438, 2706, 3106N, 3394, 4491, 4769, 7028, 8701, 8860, 9540, 10398, 10400, 10454, 10873, 11719, 12362, 12705, 14308, 14766, 14783, 15043, 15301, 15326, 15671, 16158, 16234, 16362, 16519                                                                                                               |
| K3498 | Tib_10 | Zhongba,<br>Shigatse | G2a1f        | 73, 263, 309+C, 315+C, 489, 709, 750, 1438, 2706, 3106N, 4769, 4823, 4833, 5108, 5601, 7028, 7600, 8701, 8860, 9377, 9540, 9575, 9659, 10398, 10400, 10873, 11719, 12705, 13563, 13884, 14200, 14569, 14766, 14783, 15043, 15301, 15326, 16051, 16114, 16223, 16227, 16278, 16362                                                                              |
| K3497 | Tib_10 | Zhongba,<br>Shigatse | M62b1a1b1    | 73, 143, 150, 203, 204, 263, 309+C, 315+C, 489, 750, 1438, 2706, 2735, 3106N, 3511, 4561, 4769, 7028, 7471+C, 7664, 7844, 8149, 8281-8289d, 8701, 8860, 9540, 10398, 10400, 10873, 10978, 11431, 11719, 12705, 13708, 14766, 14783, 15043, 15301, 15326, 15510, 15520, 15629, 15721, 16086, 16169, 16223, 16260, 16519                                         |
| K3494 | Tib_10 | Zhongba,<br>Shigatse | M9a1a1c1b1a  | 73, 263, 309+C, 315+C, 489, 711, 750, 1041, 1438, 2706, 3106N, 3394, 4491, 4769, 5899+XC, 7028, 7142, 7697, 8701, 8860, 9242, 9540, 10398, 10400, 10873, 11719, 12705, 14308, 14417, 14766, 14783, 15043, 15301, 15326, 16223, 16234, 16316, 16362                                                                                                             |
| K3488 | Tib_10 | Zhongba,<br>Shigatse | C4d2         | 73, 152, 249d, 310, 489, 750, 1438, 2706, 3106N, 3552A, 4715, 4769, 5471, 6026, 7028, 7100, 7196A, 8584, 8701, 8860, 9540, 9545, 10398, 10400, 10873, 11719, 11914, 11969, 12705, 12780, 13263, 14318, 14766, 14783, 15043, 15204, 15236, 15301, 15326, 15487T, 16093, 16298, 16327, 16519                                                                     |
| K3483 | Tib_10 | Zhongba,<br>Shigatse | H15a1        | 199, 263, 309+C, 315+C, 750, 951, 1438, 2248, 3106N, 4769, 6173, 6253, 8860, 11410, 13095, 14953, 15326, 16354                                                                                                                                                                                                                                                 |
| K3478 | Tib_10 | Zhongba,<br>Shigatse | M13a1b       | 73, 152, 263, 310, 489, 750, 1438, 1664, 2706, 3106N, 3644, 3918, 4769, 5773, 6023, 6253, 6620, 7028, 8701, 8860, 9064, 9540, 10192, 10398, 10400, 10411, 10790, 10873, 11719, 12705, 13135, 14766, 14783, 15043, 15301, 15326, 15586, 15924, 16145, 16148, 16188, 16189, 16223, 16381                                                                         |
| K3476 | Tib_10 | Zhongba,<br>Shigatse | C4a1a1a      | 64, 73, 249d, 263, 310, 489, 523-524d, 750, 1438, 1715, 2232+AA, 2706, 3106N, 3552A, 3576, 4715, 4769, 4884, 4958, 6026, 7028, 7196A, 7999, 8508, 8584, 8701, 8860, 9540, 9545, 10398, 10400, 10873, 11719, 11914, 11969, 12672, 12705, 13263, 14318, 14560, 14766, 14783, 15043, 15204, 15301, 15326, 15487T, 15968, 16093, 16129, 16223, 16298, 16327, 16519 |
| K3477 | Tib_10 | Zhongba,<br>Shigatse | D4j3b1       | 73, 94, 263, 309+C, 315+C, 338, 489, 750, 1438, 2706, 2880, 3010, 3106N, 4769, 4883, 5178A, 7028, 8414, 8701, 8860, 9540, 10398, 10400, 10873, 11696, 11719, 12705, 14668, 14766, 14783, 15043, 15301, 15326, 16184, 16223, 16311, 16362                                                                                                                       |
| K3806 | Tib_10 | Zhongba,<br>Shigatse | D5a2a        | 73, 150, 263, 310, 489, 523-524d, 750, 752, 1107, 2706, 3106N, 4619, 4769, 4883, 5178A, 5301, 7028, 7270, 8701, 8860, 9180, 9540, 10101, 10397, 10398, 10400, 10873, 11719, 11944, 12026, 12705, 14766, 14783, 15043, 15226, 15301, 15326, 15346, 16164, 16172, 16182C, 16183C, 16189, 16223, 16266, 16362                                                     |
| K3512 | Tib_10 | Zhongba,<br>Shigatse | M9a1b1e      | 73, 150, 152, 153, 263, 309+C, 315+C, 489, 709, 750, 1041, 1438, 2706, 3106N, 3394, 4491, 4769, 7028, 8701, 8860, 9540, 10398, 10400, 10873, 11719, 12362, 12705, 14308, 14766, 14783, 15043, 15301, 15326, 15671, 16093, 16158, 16223, 16234, 16362, 16519                                                                                                    |
| K3305 | Tib_10 | Zhongba,<br>Shigatse | G2b2a        | 73, 183, 263, 309+C, 315+C, 489, 709, 750, 1438, 1692, 2706, 3106N, 4216, 4680A, 4769, 4833, 5108, 5601, 6116, 6932, 7028, 8701, 8860, 8877, 9540, 10398, 10400, 10873, 11719, 12705, 13563, 14180, 14569, 14766, 14783, 15043, 15301, 15326, 16223, 16294, 16362                                                                                              |
| K3507 | Tib_10 | Zhongba,<br>Shigatse | A11a1a3      | 73, 152, 235, 263, 309+C, 315+C, 523-524d, 663, 750, 1005, 1438, 1736, 2706, 3106N, 4248, 4769, 4824, 5899+XC, 6755, 7028, 8794, 8843, 8860, 9650, 10040, 11719, 12705, 13708, 14766, 15326, 16093, 16223, 16290, 16293C, 16319, 16519                                                                                                                         |
| K3484 | Tib_10 | Zhongba,<br>Shigatse | C4a2b        | 73, 249d, 263, 310, 489, 750, 1438, 2232+A, 2706, 2887, 3106N, 3552A, 4696, 4715, 4769, 6026, 7028, 7196A, 8584, 8701, 8860, 9540, 9545, 10398, 10400, 10873, 11719, 11914, 11969, 12624, 12672, 12705, 13263, 14318, 14766, 14769, 14783, 15043, 15204, 15301, 15326, 15487T, 16223, 16298, 16327, 16357, 16519                                               |
| K3804 | Tib_10 | Zhongba,<br>Shigatse | M9a1a1c1b1a4 | 73, 263, 309+CC, 315+C, 489, 711, 750, 1041, 1438, 2706, 3106N, 3394, 4491, 4769, 5899+XC, 7028, 7142, 7697, 8701, 8860, 9242, 9540, 10398, 10400, 10873, 11719, 12705, 14308, 14417, 14766, 14783, 15043, 15301, 15326, 15470, 16223, 16234, 16316, 16362                                                                                                     |
| K3803 | Tib_10 | Zhongba,<br>Shigatse | M9a1a1c1b1a4 | 73, 263, 309+CC, 315+C, 489, 711, 750, 1041, 1438, 2706, 3106N, 3394, 4491, 4769, 5899+XC, 7028, 7142, 7697, 8701, 8860, 9242, 9540, 10398, 10400, 10873, 11719, 12705, 14308, 14417, 14766, 14783, 15043, 15301, 15326, 15470, 16223, 16234, 16316, 16362                                                                                                     |
| K3511 | Tib_10 | Zhongba,<br>Shigatse | A            | 73, 152, 182, 235, 263, 309+CC, 315+C, 663, 750, 1438, 1736, 2706, 3106N, 4248, 4769, 4824, 7028, 8794, 8860, 11719, 12705, 13488, 14766, 15326, 16223, 16248, 16290, 16319, 16362                                                                                                                                                                             |
| K3481 | Tib_10 | Zhongba,<br>Shigatse | A14a         | 73, 151, 152, 200, 235, 263, 310, 523-524d, 663, 735, 750, 1438, 1736, 2706, 3106N, 4248, 4769, 4824, 6272, 7028, 8334, 8640, 8794, 8860, 11719, 12004, 12468, 12705, 12990, 14766, 15326, 16093, 16223, 16290, 16319, 16362, 16519                                                                                                                            |



|       |        |                   |               |                                                                                                                                                                                                                                                                                                                                |
|-------|--------|-------------------|---------------|--------------------------------------------------------------------------------------------------------------------------------------------------------------------------------------------------------------------------------------------------------------------------------------------------------------------------------|
| K3805 | Tib_10 | Zhongba, Shigatse | A21b1         | 73, 152, 235, 263, 309+C, 315+C, 663, 750, 1438, 1736, 2706, 3106N, 4248, 4769, 4824, 7028, 8485, 8794, 8860, 11719, 12705, 13934, 14364, 14766, 15326, 16092, 16223, 16290, 16319, 16362                                                                                                                                      |
| K3475 | Tib_10 | Zhongba, Shigatse | B4h1          | 73, 195, 263, 309+CC, 315+C, 523-524d, 750, 1438, 2706, 3106N, 3398, 4703, 4769, 5093, 7028, 7080, 8281-8289d, 8790, 8812, 8860, 11485, 11719, 13269, 13710, 14766, 15326, 16129, 16181-16183d, 16189, 16261                                                                                                                   |
| K3503 | Tib_10 | Zhongba, Shigatse | D4q           | 73, 200, 263, 309+C, 315+C, 489, 750, 1438, 2625, 2706, 3010, 3106N, 4769, 4883, 5178A, 7028, 8414, 8701, 8860, 9540, 10398, 10400, 10873, 11719, 12705, 14668, 14766, 14783, 15043, 15301, 15326, 16223, 16256, 16311, 16362, 16519                                                                                           |
| K3304 | Tib_10 | Zhongba, Shigatse | F1c1a1a1      | 73, 152, 249d, 263, 310, 523-524d, 573+XC, 709, 750, 1438, 2706, 3106N, 3970, 4769, 6392, 6599, 6962, 7028, 8860, 9053, 9647, 10310, 10454, 10609, 11719, 12406, 12441, 12882, 13759, 13928C, 14766, 15326, 16051, 16111, 16129, 16304, 16519                                                                                  |
| K3510 | Tib_10 | Zhongba, Shigatse | F1c1a1a2      | 73, 143, 152, 249d, 263, 310, 523-524d, 573+XC, 709, 750, 1438, 2706, 3106N, 3970, 4769, 6392, 6599, 6962, 7028, 7055, 7915, 8412, 8860, 9053, 9647, 10181, 10310, 10454, 10609, 10739, 11719, 12406, 12882, 13759, 13928C, 14766, 15326, 16111, 16129, 16266, 16304, 16519                                                    |
| K3509 | Tib_10 | Zhongba, Shigatse | G2a1          | 73, 263, 309+C, 315+C, 489, 709, 750, 1313C, 1438, 2706, 3106N, 3290, 4102, 4277, 4769, 4833, 5108, 5601, 7028, 7600, 8701, 8860, 9377, 9540, 9575, 10398, 10400, 10873, 11719, 12705, 13563, 13926, 14155, 14200, 14212, 14569, 14766, 14783, 14839, 15043, 15301, 15326, 16223, 16227, 16278, 16304, 16362                   |
| K3489 | Tib_10 | Zhongba, Shigatse | M62a1         | 73, 146, 150, 263, 489, 750, 1438, 2706, 2735, 3106N, 3511, 4561, 4763, 4769, 7028, 7664, 8149, 8701, 8860, 9540, 9935, 10398, 10400, 10873, 11719, 12705, 13708, 14766, 14783, 15043, 15301, 15326, 15510, 15520, 15629, 15721, 16147, 16189, 16193+CC, 16223, 16295, 16487, 16519                                            |
| K3801 | Tib_10 | Zhongba, Shigatse | M9a1a1c1b1a13 | 73, 263, 309+C, 315+C, 489, 711, 750, 1041, 1438, 2706, 3106N, 3394, 3866, 4491, 4769, 5899+XC, 7028, 7142, 7697, 8701, 8860, 9083, 9242, 9540, 10343, 10398, 10400, 10873, 11719, 12705, 14308, 14417, 14766, 14783, 15043, 15301, 15326, 16223, 16234, 16316, 16362                                                          |
| K3492 | Tib_10 | Zhongba, Shigatse | M9a1a1c1b1a   | 73, 263, 309+C, 315+C, 489, 711, 750, 1041, 1438, 2706, 3106N, 3394, 4491, 4769, 5378, 5899+XC, 7028, 7142, 7697, 8701, 8860, 9242, 9540, 10398, 10400, 10873, 11719, 12705, 14308, 14417, 14766, 14783, 15043, 15301, 15326, 16223, 16234, 16316, 16362, 16519                                                                |
| K3474 | Tib_10 | Zhongba, Shigatse | M9a1a1c1b1a8  | 73, 263, 309+C, 315+C, 489, 711, 750, 1041, 1438, 2706, 3106N, 3394, 4491, 4769, 7028, 7142, 7697, 8628, 8701, 8860, 9242, 9540, 10398, 10400, 10873, 11719, 12705, 14308, 14417, 14766, 14783, 15043, 15301, 15326, 16223, 16234, 16316, 16362                                                                                |
| K3101 | Tib_10 | Zhongba, Shigatse | M9a1a1c1b1a   | 73, 263, 309+C, 315+C, 489, 711, 750, 1041, 1438, 2706, 3106N, 3394, 4491, 4769, 5899+XC, 7028, 7142, 7697, 8701, 8860, 9242, 9540, 10398, 10400, 10873, 11719, 12705, 14308, 14417, 14766, 14783, 15043, 15301, 15326, 16223, 16234, 16316, 16362                                                                             |
| K3096 | Tib_10 | Zhongba, Shigatse | M9a1b1e       | 73, 150, 152, 153, 263, 309+C, 315+C, 489, 709, 750, 1041, 1438, 2706, 3106N, 3394, 4491, 4769, 7028, 8701, 8860, 9540, 10398, 10400, 10873, 11719, 12362, 12705, 14308, 14766, 14783, 15043, 15301, 15326, 15671, 16093, 16158, 16223, 16234, 16362, 16519                                                                    |
| K3812 | Tib_10 | Zhongba, Shigatse | A11a1a        | 73, 151, 152, 235, 263, 309+C, 315+C, 523-524d, 663, 750, 1005, 1438, 1736, 2706, 3106N, 4248, 4769, 4824, 5899+XC, 6755, 7028, 8794, 8843, 8860, 9650, 11719, 12705, 14766, 15326, 16093, 16223, 16290, 16293C, 16319                                                                                                         |
| K3814 | Tib_10 | Zhongba, Shigatse | C4a2b         | 73, 249d, 263, 310, 489, 750, 1438, 1547+T, 2232+A, 2706, 2887, 2961, 3106N, 3552A, 4696, 4715, 4769, 6026, 7028, 7196A, 8584, 8701, 8860, 9540, 9545, 10398, 10400, 10873, 11719, 11914, 11969, 12624, 12672, 12705, 13263, 14318, 14766, 14769, 14783, 15043, 15204, 15301, 15326, 15487T, 16223, 16298, 16327, 16357, 16519 |
| K3490 | Tib_10 | Zhongba, Shigatse | D4j3b         | 73, 263, 309+C, 315+C, 338, 489, 750, 1438, 2706, 3010, 3106N, 4769, 4883, 5178A, 7028, 8414, 8701, 8860, 9540, 10398, 10400, 10873, 11696, 11719, 12705, 14668, 14766, 14783, 14851, 15043, 15301, 15326, 16184, 16223, 16311, 16362, 16519                                                                                   |
| K3802 | Tib_10 | Zhongba, Shigatse | F1c1a1a3      | 73, 152, 249d, 263, 309+C, 315+C, 523-524d, 573+XC, 709, 750, 1438, 2706, 3106N, 3970, 4769, 6392, 6599, 6962, 7028, 8860, 9053, 9389, 9647, 10310, 10454, 10609, 11719, 12406, 12882, 13759, 13928C, 14766, 15326, 16111, 16129, 16266, 16304, 16362, 16519                                                                   |
| K3493 | Tib_10 | Zhongba, Shigatse | M13a1b        | 73, 151, 152, 263, 310, 489, 750, 1438, 2706, 3106N, 3644, 4769, 5773, 6023, 6253, 6620, 7028, 8701, 8860, 9540, 10398, 10400, 10411, 10790, 10873, 11719, 12654, 12705, 13135, 14312, 14766, 14783, 15043, 15077, 15301, 15326, 15924, 16145, 16148, 16188, 16189, 16223, 16381                                               |
| K3496 | Tib_10 | Zhongba, Shigatse | M9a1a1c1b1a1  | 73, 263, 309+C, 315+C, 489, 711, 750, 1041, 1438, 2706, 3106N, 3394, 4491, 4769, 5899+XC, 7028, 7142, 7697, 8567, 8701, 8860, 9242, 9540, 10398, 10400, 10873, 11719, 12705, 14308, 14417, 14766, 14783, 15043, 15301, 15326, 15924, 16086, 16223, 16234, 16316, 16362                                                         |
| K3808 | Tib_10 | Zhongba, Shigatse | M62b2a        | 73, 150, 187T, 204, 263, 309+C, 315+C, 489, 750, 1438, 2706, 2735, 3106N, 3511, 3693, 4561, 4769, 6305, 7028, 7364, 7664, 8149, 8701, 8860, 8932, 9540, 10398, 10400, 10873, 11719, 12669, 12705, 13434, 13708, 14766, 14783, 15016A, 15043, 15301, 15326, 15510, 15520, 15629, 15721, 15799, 16223, 16260, 16295, 16519       |

|        |        |                   |               |                                                                                                                                                                                                                                                                                                                                                        |
|--------|--------|-------------------|---------------|--------------------------------------------------------------------------------------------------------------------------------------------------------------------------------------------------------------------------------------------------------------------------------------------------------------------------------------------------------|
| K3100  | Tib_10 | Zhongba, Shigatse | M9a1a1c1bla   | 73, 263, 310, 489, 711, 750, 1041, 1438, 2416, 2706, 3106N, 3394, 4491, 4769, 5899+XC, 7028, 7142, 7697, 8701, 8860, 9242, 9540, 10398, 10400, 10873, 11719, 12705, 14110, 14308, 14417, 14766, 14783, 15043, 15301, 15326, 15769, 16176, 16223, 16234, 16311, 16316, 16362, 16519                                                                     |
| K3097  | Tib_10 | Zhongba, Shigatse | M9a1a1c1bla12 | 73, 263, 309+C, 315+C, 489, 711, 750, 1041, 1438, 2706, 3106N, 3394, 3720, 4491, 4769, 5899+XC, 7028, 7142, 7697, 8701, 8860, 9242, 9540, 10398, 10400, 10873, 11719, 12705, 14308, 14417, 14766, 14783, 15043, 15301, 15326, 16114G, 16223, 16234, 16316, 16362                                                                                       |
| K3307  | Tib_10 | Zhongba, Shigatse | M9a1b1c       | 73, 150, 152, 263, 310, 489, 750, 1041, 1438, 2706, 3106N, 3394, 4491, 4769, 7028, 8701, 8860, 9540, 10398, 10400, 10454, 10873, 11719, 12362, 12705, 14308, 14766, 14783, 15043, 15301, 15326, 15671, 16158, 16223, 16234, 16362, 16519                                                                                                               |
| K3807  | Tib_10 | Zhongba, Shigatse | C4a2b2        | 73, 194, 249d, 263, 489, 750, 1438, 1677, 2232+A, 2706, 2887, 3106N, 3552A, 4696, 4715, 4769, 6026, 6221, 7028, 7196A, 8584, 8701, 8860, 9540, 9545, 10304, 10398, 10400, 10873, 11719, 11914, 11969, 12624, 12672, 12705, 13263, 14318, 14766, 14783, 15043, 15204, 15301, 15326, 15487T, 16223, 16298, 16311, 16327, 16357, 16519                    |
| K3499  | Tib_10 | Zhongba, Shigatse | D4j1          | 73, 185, 263, 309+C, 315+C, 489, 750, 1438, 2069, 2706, 3010, 3106N, 4263, 4769, 4883, 5178A, 5262, , 7028, 7058, 8281-8289d, 8414, 8701, 8860, 8950, 9540, 10398, 10400, 10873, 11696, 11719, 12705, 14305, 14668, 14766, 14783, 15043, 15301, 15326, 16223, 16260, 16362                                                                             |
| K3506  | Tib_10 | Zhongba, Shigatse | M9a1a1c1bla   | 73, 263, 310, 489, 711, 750, 1041, 1438, 2706, 3106N, 3394, 4069TC, 4491, 4769, 5899+XC, 7028, 7142, 7697, 8701, 8860, 9242, 9540, 9833, 10398, 10400, 10654, 10873, 11447, 11719, 12705, 14308, 14417, 14766, 14783, 15043, 15301, 15326, 16223, 16234, 16316, 16362                                                                                  |
| K3502  | Tib_10 | Zhongba, Shigatse | B6a1a         | 73, 263, 309+C, 315+C, 356+C, 750, 1438, 1719, 2706, 3106N, 4093, 4769, 5894C, 7028, 8281-8289d, 8860, 9452, 11719, 11914, 12950, 13928C, 14305, 14766, 15326, 16051, 16183C, 16189, 16193+CC, 16261, 16519, 16527                                                                                                                                     |
| K3811  | Tib_10 | Zhongba, Shigatse | D4b2b8        | 73, 263, 310, 390, 489, 523-524d, 750, 1382C, 1438, 2706, 3010, 3106N, 3398, 4769, 4883, 5178A, 7028, 8020, 8414, 8701, 8860, 8964, 9296, 9540, 9824A, 10398, 10400, 10873, 11719, 12705, 14668, 14755, 14766, 14783, 15043, 15301, 15326, 15613, 16223, 16362, 16519                                                                                  |
| K3810  | Tib_10 | Zhongba, Shigatse | G2a1i         | 73, 263, 310, 489, 709, 750, 1438, 2706, 3106N, 4769, 4833, 5108, 5601, 7028, 7600, 8701, 8860, 9377, 9540, 9575, 10398, 10400, 10873, 11719, 12705, 13517T, 13563, 14200, 14569, 14766, 14783, 15043, 15301, 15326, 16129, 16223, 16231G, 16278, 16362                                                                                                |
| K3501  | Tib_10 | Zhongba, Shigatse | D4j1a1e       | 73, 195, 263, 310, 489, 750, 1438, 2706, 3010, 3106N, 4769, 4883, 5178A, 5262, 7028, 7581, 7783, 8414, 8701, 8860, 9540, 10398, 10400, 10873, 11696, 11719, 12130, 12358, 12705, 14668, 14766, 14783, 15043, 15295, 15301, 15326, 16086, 16223, 16362, 16399, 16519                                                                                    |
| K3486  | Tib_10 | Zhongba, Shigatse | M62b1         | 73, 150, 203, 204, 263, 309+C, 315+C, 489, 750, 1438, 2706, 2735, 3106N, 3511, 4561, 4769, 7028, 7664, 8084, 8149, 8701, 8860, 9540, 10398, 10400, 10873, 11719, 12705, 13708, 14058, 14766, 14783, 15043, 15301, 15326, 15510, 15520, 15629, 15721, 16223, 16260, 16274, 16295, 16318, 16320, 16519                                                   |
| K38217 | Tib_11 | Shannan           | D4j1a1f       | 73, 263, 310, 489, 750, 1438, 2706, 3010, 3106N, 4769, 4883, 5178A, 5262, 7028, 7581, 7783, 8414, 8701, 8860, 9053, 9540, 10398, 10400, 10873, 11696, 11719, 12130, 12358, 12705, 14668, 14766, 14783, 15043, 15184, 15295, 15301, 15326, 16086, 16223, 16311, 16362                                                                                   |
| K38030 | Tib_11 | Shannan           | M9a1b1c       | 73, 150, 152, 153, 263, 310, 489, 750, 1041, 1438, 2706, 3106N, 3394, 4491, 4769, 7028, 8701, 8860, 9540, 10398, 10400, 10454, 10517, 10873, 11719, 12362, 12705, 14308, 14766, 14783, 15043, 15132, 15301, 15326, 15671, 16158, 16223, 16234, 16265C, 16362, 16519                                                                                    |
| K38085 | Tib_11 | Shannan           | M9a1a1c1bla11 | 73, 263, 309+C, 315+C, 489, 711, 750, 1041, 1438, 2706, 3106N, 3311, 3394, 4491, 4769, 5492, 5899+XC, 7028, 7142, 7697, 8701, 8860, 9242, 9540, 10398, 10400, 10873, 11719, 12705, 14308, 14417, 14766, 14783, 15043, 15301, 15326, 16223, 16234, 16316, 16362                                                                                         |
| K38214 | Tib_11 | Shannan           | C4a1a1a2      | 73, 249d, 263, 310, 489, 750, 1438, 1715, 2232+AA, 2706, 3106N, 3552A, 3576, 4715, 4769, 4884, 4958, 5918, 6026, 7028, 7196A, 7999, 8508, 8584, 8701, 8860, 9540, 9545, 10398, 10400, 10873, 11719, 11914, 11969, 12672, 12705, 13263, 14318, 14766, 14783, 15043, 15204, 15219, 15301, 15326, 15487T, 15968, 16093, 16129, 16223, 16298, 16327, 16519 |
| K38626 | Tib_11 | Shannan           | M9a1a1c1bla   | 73, 195, 263, 309+C, 315+C, 489, 711, 750, 1041, 1438, 2706, 3106N, 3394, 4491, 4769, 5894C, 7028, 7142, 7697, 8701, 8860, 9242, 9540, 10398, 10400, 10873, 11719, 12705, 14308, 14417, 14766, 14783, 15043, 15301, 15326, 16223, 16234, 16316, 16362                                                                                                  |
| K38722 | Tib_11 | Shannan           | A11a1a3       | 73, 152, 235, 263, 309+C, 315+C, 523-524d, 663, 750, 1005, 1438, 1736, 2706, 3106N, 4248, 4295, 4769, 4824, 5899+XC, 6755, 7028, 8794, 8843, 8860, 9650, 11719, 12705, 13708, 14766, 15326, 16093, 16223, 16290, 16293C, 16319, 16357, 16519                                                                                                           |
| K38615 | Tib_11 | Shannan           | A11a1a4       | 73, 152, 235, 263, 310, 523-524d, 663, 750, 1005, 1438, 1736, 2083, 2523, 2557, 2625, 2706, 3106N, 4248, 4769, 4824, 5899+XC, 6755, 7028, 8794, 8843, 8860, 9055, 9650, 11719, 12705, 13926, 14766, 15326, 16093, 16223, 16290, 16293C, 16319, 16519                                                                                                   |
| K38597 | Tib_11 | Shannan           | A11a1a        | 73, 146, 152, 235, 263, 309+CC, 315+C, 523-524d, 663, 750, 1005, 1438, 1736, 2706, 3106N, 4248, 4769, 4824, 5581, 5899+XC, 6755, 7028, 8794, 8843, 8860, 9650, 11719, 12705, 14766, 15326, 16093, 16223, 16290, 16293C, 16319, 16519                                                                                                                   |

|        |        |         |              |                                                                                                                                                                                                                                                                                                                                 |
|--------|--------|---------|--------------|---------------------------------------------------------------------------------------------------------------------------------------------------------------------------------------------------------------------------------------------------------------------------------------------------------------------------------|
| K38355 | Tib_11 | Shannan | B4a4         | 73, 193, 263, 309+C, 315+C, 523-524d, 709, 750, 825A, 1106, 1185, 1211, 1438, 2523, 2557, 2625, 2706, 3106N, 3209T, 3338, 4769, 5438, 5465, 6929, 7028, 7853, 8281-8289d, 8860, 9123, 9233, 11719, 14751, 14766, 15326, 16182C, 16183C, 16189, 16217, 16261, 16299, 16519                                                       |
| K38704 | Tib_11 | Shannan | C4a2b2       | 73, 249d, 263, 489, 750, 1438, 1677, 2232+A, 2706, 2887, 3106N, 3552A, 4696, 4715, 4769, 6026, 7028, 7196A, 8584, 8701, 8860, 9540, 9545, 10304, 10398, 10400, 10873, 11719, 11914, 11969, 12624, 12672, 12705, 13263, 14318, 14766, 14783, 15043, 15148, 15204, 15301, 15326, 15487T, 16223, 16298, 16311, 16327, 16357, 16519 |
| K38489 | Tib_11 | Shannan | D4b2b10      | 41, 73, 194, 263, 310, 489, 523-524d, 750, 1382C, 1438, 2706, 3010, 3106N, 4769, 4883, 5178A, 7028, 8020, 8414, 8701, 8860, 8964, 9296, 9540, 9824A, 10398, 10400, 10873, 11719, 12705, 14668, 14766, 14783, 15043, 15301, 15326, 16223, 16362, 16519                                                                           |
| K38808 | Tib_11 | Shannan | M9a1a1c1b1a  | 73, 263, 309+C, 315+C, 489, 711, 750, 1041, 1438, 2706, 3106N, 3394, 4491, 4769, 5899+XC, 7028, 7142, 7697, 8251, 8701, 8860, 9242, 9540, 10398, 10400, 10873, 11719, 12705, 13434, 14308, 14417, 14766, 14783, 15043, 15202, 15301, 15326, 16223, 16234, 16316, 16362                                                          |
| K38132 | Tib_11 | Shannan | M9a1a1c1b1a  | 73, 263, 309+CC, 315+C, 489, 711, 750, 1041, 1438, 2706, 3106N, 3394, 4491, 4769, 5899+XC, 7028, 7142, 7697, 8701, 8860, 9242, 9540, 10398, 10400, 10873, 11719, 12705, 14308, 14417, 14766, 14783, 15043, 15301, 15326, 16223, 16234, 16316, 16362                                                                             |
| K38129 | Tib_11 | Shannan | M9a1a1c1b1a  | 73, 263, 310, 489, 711, 750, 1041, 1438, 2706, 3106N, 3394, 4491, 4769, 5899+XC, 6710, 7028, 7142, 7697, 8701, 8860, 9242, 9540, 10398, 10400, 10873, 11719, 12705, 14308, 14417, 14766, 14783, 15043, 15301, 15326, 16223, 16234, 16316, 16362                                                                                 |
| K38015 | Tib_11 | Shannan | M9a1a1c1b1a2 | 73, 146, 263, 310, 489, 711, 750, 1041, 1438, 2706, 3106N, 3394, 4491, 4769, 5899+XC, 7028, 7142, 7697, 8701, 8860, 9242, 9540, 10398, 10400, 10873, 11719, 12705, 14308, 14417, 14766, 14783, 15043, 15301, 15326, 16093, 16223, 16234, 16316, 16362                                                                           |
| K38122 | Tib_11 | Shannan | M9a1a1c1b1a2 | 73, 146, 263, 297, 309+C, 315+C, 489, 711, 750, 1041, 1438, 2706, 3106N, 3367, 3394, 3438, 4491, 4769, 5899+XC, 6446, 7028, 7142, 7697, 8701, 8860, 9242, 9540, 10398, 10400, 10873, 11719, 12528, 12705, 12727, 14308, 14417, 14766, 14783, 15043, 15301, 15326, 16051, 16129, 16223, 16234, 16316, 16362                      |
| K38530 | Tib_11 | Shannan | M9a1b        | 73, 150, 152, 153, 263, 309+C, 315+C, 489, 750, 1041, 1438, 2706, 3106N, 3394, 4491, 4769, 7028, 8701, 8853, 8860, 9540, 10398, 10400, 10873, 11719, 12362, 12705, 13470, 14308, 14766, 14783, 15043, 15301, 15326, 15671, 16223, 16234, 16362, 16519                                                                           |
| K38422 | Tib_11 | Shannan | A11b         | 73, 146, 152, 235, 263, 309+CC, 315+C, 523-524d, 663, 750, 1438, 1736, 2706, 3106N, 3290, 4117, 4248, 4769, 4824, 7028, 8794, 8860, 9489, 9650, 11719, 12705, 14766, 15326, 15787, 16223, 16234, 16290, 16293C, 16319, 16519, 16527                                                                                             |
| K38661 | Tib_11 | Shannan | G3b          | 73, 263, 310, 489, 709, 750, 1438, 2706, 3106N, 4769, 4833, 5108, 7028, 8584, 8701, 8860, 9007, 9540, 10398, 10400, 10873, 11009, 11719, 12705, 13477, 14221, 14569, 14605, 14766, 14783, 15043, 15301, 15326, 15927, 16223, 16274, 16362                                                                                       |
| K38235 | Tib_11 | Shannan | B4d1'2'3     | 73, 263, 309+CC, 315+C, 556T, 573+XC, 750, 827, 1438, 2706, 3106N, 3757, 4769, 7028, 8281-8289d, 8512, 8860, 11719, 11914, 12142, 13942, 14766, 15326, 15535, 15930, 16183C, 16189, 16217, 16234, 16519                                                                                                                         |
| K38382 | Tib_11 | Shannan | D4j1a1f      | 73, 263, 310, 489, 524+ACAC, 750, 1438, 2706, 3010, 3106N, 4769, 4883, 5147, 5178A, 5262, 7028, 7581, 7783, 8414, 8701, 8860, 9053, 9540, 9650, 10398, 10400, 10873, 11696, 11719, 12130, 12358, 12705, 14668, 14766, 14783, 15043, 15295, 15301, 15326, 16086, 16192, 16223, 16362                                             |
| K38470 | Tib_11 | Shannan | F1d1a2       | 73, 146, 249d, 263, 309+CC, 315+C, 523-524d, 750, 1438, 1734, 2706, 3106N, 3970, 4769, 5628, 6392, 6962, 7028, 7738, 8860, 10310, 10609, 11719, 12406, 12882, 13135, 13928C, 14766, 15326, 15402, 16145, 16304, 16519                                                                                                           |
| K38315 | Tib_11 | Shannan | G2a1i        | 73, 263, 310, 489, 709, 750, 1438, 2706, 3106N, 4769, 4833, 5108, 5601, 6896, 7028, 7600, 8701, 8860, 9377, 9540, 9575, 9948, 10398, 10400, 10873, 11719, 12705, 13563, 14200, 14569, 14766, 14783, 15043, 15301, 15326, 16129, 16223, 16278, 16362                                                                             |
| K38043 | Tib_11 | Shannan | M9a1a1c1b1a  | 73, 263, 279, 309+CC, 315+C, 489, 711, 750, 1041, 1438, 2706, 3106N, 3394, 4491, 4769, 5899+XC, 7028, 7142, 7697, 8701, 8854, 8860, 9242, 9540, 10398, 10400, 10873, 11447, 11506, 11719, 12705, 14308, 14417, 14766, 14783, 15043, 15301, 15326, 16223, 16234, 16316, 16362                                                    |
| K38746 | Tib_11 | Shannan | M9a1b1d      | 73, 150, 152, 153, 263, 310, 489, 750, 1041, 1438, 2706, 3106N, 3394, 4491, 4769, 7028, 7754, 8701, 8860, 9540, 10398, 10400, 10873, 11719, 12362, 12705, 14308, 14766, 14783, 15043, 15119, 15301, 15326, 15671, 16158, 16223, 16234, 16362, 16519                                                                             |
| K38345 | Tib_11 | Shannan | F1c1a1a      | 73, 152, 249d, 263, 309+CC, 315+C, 523-524d, 573+XC, 709, 750, 1438, , 2706, 3106N, 3970, 4769, 6392, 6599, 6638, 6962, 7028, 8860, 9053, 9647, 10310, 10454, 10609, 11719, 11928, 12406, 12882, 13020, 13759, 13928C, 14766, 15326, 16111, 16129, 16266, 16304, 16519                                                          |
| K38744 | Tib_11 | Shannan | A15c1        | 73, 152, 235, 309+C, 315+C, 523-524d, 663, 750, 825A, 1185, 1211, 1249, 1263T, 1303, 1320, 1438, 1736, 2523, 2557, 2625, 2706, 3106N, 4248, 4769, 4824, 7028, 7609, 8459, 8794, 8860, 9052, 11719, 12705, 13111, 13899, 14067, 14766, 15262, 15326, 15924, 16092, 16223, 16290, 16319, 16327, 16362                             |
| K38765 | Tib_11 | Shannan | F1g          | 73, 249d, 263, 309+CC, 315+C, 523-524d, 750, 825A, 1185, 1211, 1438, 2389, 2523, 2557, 2625, 2706, 2857, 3106N, 3398, 3483, 3970, 4769, 6392, 6962, 7028, 8854, 8860, 10310, 10609, 11719, 12406, 12882, 13398, 13928C, 14766, 15326, 15442, 16183C, 16189, 16304, 16519                                                        |

|        |        |         |             |                                                                                                                                                                                                                                                                                                                                        |
|--------|--------|---------|-------------|----------------------------------------------------------------------------------------------------------------------------------------------------------------------------------------------------------------------------------------------------------------------------------------------------------------------------------------|
| K38316 | Tib_11 | Shannan | M62b1a1a    | 73, 143, 150, 203, 204, 263, 309+C, 315+C, 489, 750, 1438, 2523, 2557, 2625, 2706, 2735, 3106N, 3511, 4200, 4561, 4769, 7028, 7664, 7844, 8149, 8281-8289d, 8701, 8860, 9540, 10398, 10400, 10873, 10978, 11431, 11719, 12705, 13708, 14766, 14783, 15043, 15301, 15326, 15510, 15520, 15629, 15721, 16169, 16223, 16260, 16295, 16519 |
| K38128 | Tib_11 | Shannan | D4j1a1f     | 73, 263, 309+C, 315+C, 489, 750, 1438, 2706, 3010, 3106N, 4769, 4883, 5178A, 5262, 7028, 7581, 7783, 8414, 8701, 8860, 9053, 9540, 10398, 10400, 10873, 11696, 11719, 12130, 12358, 12705, 14668, 14766, 14783, 15043, 15295, 15301, 15326, 16086, 16223, 16362                                                                        |
| K38725 | Tib_11 | Shannan | F1b1        | 73, 146, 249d, 263, 310, 523-524d, 750, 1438, 1943, 2706, 3106N, 3970, 4732, 4769, 5147, 6392, 6962, 7028, 7598, 8860, 10310, 10609, 10976, 11150, 11719, 12406, 12633, 12882, 13928C, 14476, 14766, 15326, 15437, 15479, 16183C, 16189, 16232A, 16249, 16304, 16311                                                                   |
| K38307 | Tib_11 | Shannan | G1a1        | 73, 150, 263, 309+C, 315+C, 489, 709, 750, 1438, 2706, 3106N, 4769, 4833, 5108, 7028, 7867, 8200, 8654, 8701, 8860, 9540, 10398, 10400, 10873, 11719, 11908, 12705, 14569, 14766, 14783, 15043, 15301, 15323, 15326, 15497, 15745A, 15860, 16223, 16325, 16362, 16519                                                                  |
| K38783 | Tib_11 | Shannan | M9a1b1c     | 73, 150, 152, 153, 263, 310, 489, 709, 750, 1041, 1438, , 2706, 3106N, 3394, 4491, 4769, 7028, 8701, 8860, 9000, 9540, 10398, 10400, 10454, 10873, 11719, 12351, 12362, 12705, 14308, 14766, 14783, 15043, 15301, 15326, 15671, 16158, 16223, 16234, 16288, 16362, 16519                                                               |
| K38156 | Tib_11 | Shannan | M9a1b1c     | 73, 150, 152, 153, 263, 309+C, 315+C, 489, 750, 1041, 1438, 2706, 3106N, 3394, 4491, 4769, 7028, 8701, 8860, 9540, 10398, 10400, 10454, 10873, 11719, 12362, 12705, 14308, 14766, 14783, 15043, 15301, 15326, 15671, 16158, 16172, 16223, 16234, 16362, 16519                                                                          |
| K38098 | Tib_11 | Shannan | M9a1b1c     | 73, 150, 152, 153, 183, 263, 310, 489, 750, 1041, 1438, 2706, 3106N, 3394, 4491, 4769, 7028, 8701, 8860, 9540, 10398, 10400, 10454, 10873, 11719, 12362, 12705, 14308, 14766, 14783, 15043, 15301, 15326, 15671, 16158, 16223, 16234, 16362, 16519                                                                                     |
| K38663 | Tib_11 | Shannan | M9a1a1c1b1a | 73, 263, 309+CC, 315+C, 489, 711, 750, , 1041, 1438, , , 2706, 3106N, 3394, 4491, 4769, 5899+XC, 7028, 7142, 7697, 8701, 8860, 9242, 9540, 10398, 10400, 10873, 11719, 12705, 14308, 14417, 14766, 14783, 15043, 15301, 15326, 16051, 16223, 16234, 16316, 16362                                                                       |
| K38216 | Tib_11 | Shannan | M9a1a1c1b1a | 73, 263, 309+C, 315+C, 489, 711, 750, 1041, 1438, 2706, 3106N, 3394, 4491, 4769, 5899+XC, 7028, 7142, 7595, 7697, 8701, 8860, 9242, 9540, 10398, 10400, 10873, 11719, 12705, 14308, 14417, 14766, 14783, 15043, 15301, 15326, 16223, 16234, 16316, 16362                                                                               |
| K38851 | Tib_11 | Shannan | A11a1a      | 73, 152, 235, 263, 309+C, 315+C, 523-524d, 663, 750, 1005, 1438, 1736, 2706, 3106N, 4248, 4769, 4824, 5899+XC, 6755, 7028, 8794, 8843, 8860, 9103, 9650, 10978, 11719, 12705, 14766, 15326, 15470, 16093TC, 16223, 16243, 16290, 16293C, 16319, 16519                                                                                  |
| K38528 | Tib_11 | Shannan | B4d4        | 73, 150, 263, 309+C, 315+C, 750, 827, 1438, 2706, 2755, 3106N, 4769, 5372, 6324C, 7028, 8281-8289d, 8860, 9306TC, 11719, 11914, 13359, 13942, 14766, 15326, 15535, 15930, 16183C, 16189, 16217, 16234, 16324, 16519                                                                                                                    |
| K38761 | Tib_11 | Shannan | B5b         | 73, 263, 309+C, 315+C, 523-524d, 709, 750, 960+XC, 1438, 1598, 2706, 2757, 3106N, 4418, 4769, 6101, 6719, 7028, 8281-8289d, 8584, 8784, 8829, 8860, 9950, 10398, 11719, 12361, 14384, 14527, 14766, 15077, 15223, 15326, 15508, 15662, 15851, 15927, 16140, 16182C, 16183C, 16189, 16243, 16519                                        |
| K38849 | Tib_11 | Shannan | C7b         | 73, 249d, 263, 310, 489, 750, 1438, 2706, 3106N, 3552A, 4715, 4769, 5821, 5918, 6338, 7028, 7196A, 8584, 8701, 8860, 9540, 9545, 10398, 10400, 10873, 11101, 11719, 11914, 12705, 13263, 14318, 14766, 14783, 15301, 15326, 15487T, 15928, 16037, 16051, 16183C, 16189, 16223, 16278, 16298, 16327, 16519                              |
| K38756 | Tib_11 | Shannan | D4b2b8      | 73, 263, 310, 390, 489, 523-524d, 750, 1382C, 1438, 2706, 3010, 3106N, 3398, 4769, 4883, 5178A, 7028, 8020, 8414, 8701, 8860, 8964, 9296, 9540, 9824A, 10398, 10400, 10873, 11719, 12705, 14668, 14755, 14766, 14783, 15001, 15043, 15236, 15301, 15326, 15613, 16223, 16362, 16519                                                    |
| K38488 | Tib_11 | Shannan | D4g2a1c1    | 73, 263, 298, 309+C, 315+C, 489, 750, 1438, 2706, 3010, 3106N, 4394, 4769, 4883, 5178A, 5231, 7028, 8414, 8701, 8860, 9540, 10398, 10400, 10873, 11059, 11150, 11719, 12705, 12966A, 13104, 14668, 14766, 14783, 15043, 15301, 15326, 16223, 16240, 16274, 16362, 16519                                                                |
| K38274 | Tib_11 | Shannan | D4j1a1d     | 73, 195, 263, 310, 489, 750, 1438, 2706, 3010, 3106N, 4769, 4883, 5178A, 5262, 7028, 7581, 7783, 8414, 8701, 8860, 9540, 10398, 10400, 10873, 11696, 11719, 12130, 12358, 12705, 14668, 14766, 14783, 15043, 15295, 15301, 15326, 16086, 16223, 16274, 16362, 16519                                                                    |
| K38410 | Tib_11 | Shannan | D5a2a       | 73, 150, 263, 310, 489, 523-524d, 750, 752, 1107, 2706, 3106N, 4769, 4883, 5178A, 5301, 7028, 8701, 8860, 9180, 9540, 10397, 10398, 10400, 10873, 11719, 11944, 12026, 12705, 14766, 14783, 15043, 15301, 15326, 16092, 16182C, 16183C, 16189, 16213, 16223, 16266, 16362                                                              |
| K38768 | Tib_11 | Shannan | F1c1a1a1    | 73, 152, 249d, 263, 310, 523-524d, 709, 750, 1438, 2706, 3106N, 3970, 4769, 6392, 6599, 6962, 7028, 8860, 9053, 9647, 10310, 10454, 10609, 11719, 12406, 12882, 13759, 13928C, 14766, 15244, 15326, 16111, 16129, 16304, 16519                                                                                                         |
| K38741 | Tib_11 | Shannan | F1d         | 73, 146, 249d, 263, 309+CC, 315+C, 523-524d, 750, 1438, 1734, 2706, 3106N, 3970, 4769, 5460, 5628, 5794, 6392, 6962, 7028, 7738, 8410, 8860, 10310, 10609, 11092, 11719, 12406, 12882, 13928C, 14766, 15326, 15402, 16304, 16519                                                                                                       |
| K38580 | Tib_11 | Shannan | F1d1a2a1    | 73, 146, 234, 249d, 263, 309+CC, 315+C, 523-524d, 750, 1438, 1734, 1888, 2706, 3106N, 3970, 4769, 5628, 6392, 6962, 7028, 7738, 8167, 8860, 10310, 10609, 11719, 12372, 12406, 12882, 13135, 13928C, 14766, 15326, 15402, 16145, 16189, 16193+CC, 16255, 16284, 16304, 16519                                                           |

|        |        |         |              |                                                                                                                                                                                                                                                                                                     |
|--------|--------|---------|--------------|-----------------------------------------------------------------------------------------------------------------------------------------------------------------------------------------------------------------------------------------------------------------------------------------------------|
| K38554 | Tib_11 | Shannan | F1g          | 73, 249d, 263, 309+CC, 315+C, 523-524d, 750, 1438, 2389, 2706, 3106N, 3398, 3421, 3970, 4769, 6023, 6392, 6962, 7028, 8860, 10310, 10609, 11719, 12406, 12882, 13928C, 14766, 15326, 16182C, 16183C, 16189, 16304, 16519                                                                            |
| K38616 | Tib_11 | Shannan | G2b1b        | 73, 263, 309+C, 315+C, 489, 709, 750, 1438, 2706, 3106N, 4769, 4833, 4853, 5108, 5601, 7028, 8701, 8860, 8877, 9540, 10398, 10400, 10873, 11719, 12375, 12705, 13563, 14569, 14766, 14783, 15043, 15301, 15326, 16223, 16362                                                                        |
| K38423 | Tib_11 | Shannan | G3a1a1a      | 16T, 73, 143, 150, 263, 309+C, 315+C, 489, 709, 750, 1438, 2706, 3106N, 4674, 4769, 4833, 5108, 7028, 8701, 8860, 8861, 9540, 10398, 10400, 10873, 11719, 11914, 12612, 12705, 14569, 14766, 14783, 15043, 15301, 15326, 15746, 16215, 16223, 16274                                                 |
| K38850 | Tib_11 | Shannan | M10a1b       | 73, 263, 310, 489, 573+XC, 709, 750, 1438, 2706, 3106N, 3172+C, 4140, 4769, 7028, 7250, 8701, 8793, 8856, 8860, 9111, 9540, 10398, 10400, 10646, 10873, 11719, 12549, 12705, 13152, 14502, 14766, 14783, 15040, 15043, 15071, 15218, 15301, 15326, 15913, 16066, 16223, 16257, 16311                |
| K38282 | Tib_11 | Shannan | M61a         | 73, 152, 263, 309+C, 315+C, 489, 750, 980, 1193, 1342, 1438, 2706, 3106N, 3438, 4769, 5582C, 6253, 7028, 8269, 8701, 8790, 8860, 9540, 10398, 10400, 10873, 11719, 11810, 12705, 12732, 14766, 14783, 15043, 15301, 15326, 16093, 16223, 16270, 16362, 16381, 16519                                 |
| K38588 | Tib_11 | Shannan | M62b2        | 73, 150, 178, 198, 204, 263, 310, 489, 750, 1438, 2706, 2735, 3106N, 3511, 3693, 4561, 4769, 6305, 7028, 7664, 8149, 8701, 8860, 9540, 10398, 10400, 10873, 11719, 12705, 13708, 14766, 14783, 15043, 15301, 15326, 15510, 15520, 15629, 15721, 16179, 16223, 16260, 16519                          |
| K38471 | Tib_11 | Shannan | M62b2        | 73, 150, 178, 194, 204, 263, 309+CC, 315+C, 489, 750, 1243, 1438, 2706, 2735, 3106N, 3511, 3693, 4561, 4769, 6305, 7028, 7664, 8149, 8701, 8860, 9540, 10398, 10400, 10873, 11719, 12705, 13708, 14766, 14783, 15043, 15301, 15326, 15510, 15520, 15629, 15721, 16223, 16260, 16295, 16519          |
| K38695 | Tib_11 | Shannan | M9a1a1c1b1a  | 73, 263, 309+C, 315+C, 489, 711, 750, 1041, 1438, 2706, 3106N, 3394, 4123, 4491, 4769, 5899+XC, 7028, 7142, 7697, 8701, 8860, 9242, 9540, 10398, 10400, 10873, 11719, 12705, 13830, 14308, 14417, 14766, 14783, 15043, 15301, 15326, 16223, 16234, 16316, 16362, 16519                              |
| K38490 | Tib_11 | Shannan | M9a1a1c1b1a  | 73, 263, 309+C, 315+C, 489, 711, 750, 1041, 1438, 2706, 3106N, 3335, 3394, 4491, 4769, 5899+XC, 7028, 7142, 7697, 8251, 8701, 8860, 9242, 9540, 10398, 10400, 10873, 11719, 12705, 13899, 14308, 14417, 14766, 14783, 15043, 15232, 15301, 15326, 16223, 16234, 16316, 16362                        |
| K38377 | Tib_11 | Shannan | M9a1a1c1b1a  | 73, 263, 309+C, 315+C, 453, 489, 711, 750, 1041, 1438, 2706, 3106N, 3394, 4491, 4769, 5899+XC, 7028, 7142, 7697, 8701, 8860, 9242, 9540, 10398, 10400, 10873, 11719, 12705, 14308, 14417, 14766, 14783, 15043, 15301, 15326, 16223, 16234, 16316, 16362                                             |
| K38805 | Tib_11 | Shannan | M9a1a1c1b1a2 | 73, 146, 263, 297, 310, 489, 711, 750, 1041, 1438, 2706, 3106N, 3394, 3438, 4491, 4769, 5899+XC, 6446, 7028, 7142, 7697, 8701, 8860, 9242, 9540, 10398, 10400, 10873, 11719, 12705, 14308, 14417, 14766, 14783, 15043, 15301, 15326, 16223, 16234, 16316, 16362                                     |
| K38788 | Tib_11 | Shannan | M9a1a1c1b1a2 | 73, 146, 263, 309+CC, 315+C, 489, 711, 750, 1041, 1438, 2706, 3106N, 3394, 4136, 4491, 4769, 5899+XC, 6446, 7028, 7142, 7697, 8701, 8860, 9242, 9540, 10398, 10400, 10873, 11719, 12705, 14308, 14417, 14766, 14783, 15043, 15301, 15326, 16223, 16234, 16316, 16362                                |
| K38562 | Tib_11 | Shannan | M9a1a2a1b    | 73, 153, 207, 263, 309+C, 315+C, 489, 513, 750, 1041, 1438, 2706, 3106N, 3394, 4491, 4769, 7028, 7256, 8701, 8860, 9540, 10398, 10400, 10873, 11719, 12705, 14142A, 14308, 14766, 14783, 15043, 15301, 15326, 16145, 16223, 16234, 16316                                                            |
| K38696 | Tib_11 | Shannan | N9a5         | 73, 150, 263, 309+C, 315+C, 750, 1438, 2706, 3106N, 3729, 4227, 4769, 5231, 5417, 7028, 8860, 11719, 12358, 12372, 12705, 14766, 15184, 15326, 15883, 15944d, 16172, 16209, 16223, 16257G                                                                                                           |
| K38684 | Tib_11 | Shannan | U1a1c1a      | 73, 263, 285, 310d, 750, 1438, 2218, 2706, 3106N, 4769, 4991, 6026, 7028, 7581, 8766, 8860, 11467, 11719, 12308, 12372, 12879, 13104, 14070, 14364, 14766, 15115, 15148, 15217, 15326, 15954C, 16182C, 16183C, 16189, 16249, 16465, 16519                                                           |
| K38531 | Tib_11 | Shannan | Z7           | 73, 152, 249d, 263, 310, 489, 523-524d, 750, 1438, 2352, 2706, 2780, 3106N, 4363, 4715, 4769, 4841, 6752, 7028, 7196A, 8584, 8598, 8701, 8860, 9090, 9214, 9540, 10398, 10400, 10653, 10873, 11719, 12705, 14766, 14783, 15043, 15301, 15326, 15487T, 15784, 16185, 16223, 16260, 16298, 16519      |
| K38840 | Tib_11 | Shannan | M13a1b       | 73, 152, 263, 310, 489, 750, 1438, 1555, 2706, 3106N, 3644, 4769, 5773, 6023, 6253, 6620, 7028, 7746, 8701, 8860, 9540, 9983, 10398, 10400, 10411, 10790, 10873, 10978, 11719, 12705, 13135, 13236, 14766, 14783, 15043, 15301, 15326, 15924, 16145, 16148, 16188, 16189, 16223, 16244, 16381       |
| K38730 | Tib_11 | Shannan | D4h1c2a      | 73, 263, 310, 489, 709, 750, 1438, 2706, 3010, 3106N, 3336, 3644, 4182, 4769, 4883, 5048, 5178A, 5899+XC, 6881, 7028, 7055, 7181, 7673, 8179, 8414, 8701, 8860, 9540, 10398, 10400, 10873, 11719, 12705, 13914A, 14162, 14668, 14766, 14783, 15043, 15301, 15326, 15924, 16174, 16223, 16311, 16362 |
| K38686 | Tib_11 | Shannan | G2b2a        | 73, 183, 263, 309+CC, 315+C, 489, 709, 750, 1438, 1692, 2706, 3106N, 3796, 4216, 4680A, 4769, 4833, 5108, 5601, 6116, 6932, 7028, 8701, 8860, 8877, 9540, 10398, 10400, 10873, 11719, 12127, 12630, 12705, 12715, 13563, 14569, 14766, 14783, 15043, 15301, 15326, 15367, 16223, 16294, 16362       |
| K38662 | Tib_11 | Shannan | M13a1b       | 73, 152, 195TC, 263, 310, 489, 750, 1438, 2706, 3106N, 3644, 4769, 5773, 6023, 6253, 6620, 7028, 8701, 8860, 9540, 10398, 10400, 10411, 10790, 10873, 11719, 12705, 13135, 14766, 14783, 15043, 15301, 15326, 15924, 16145, 16148, 16188, 16189, 16223, 16381, 16519                                |

|                 |           |          |             |                                                                                                                                                                                                                                                                                                |
|-----------------|-----------|----------|-------------|------------------------------------------------------------------------------------------------------------------------------------------------------------------------------------------------------------------------------------------------------------------------------------------------|
| K38625          | Tib_11    | Shannan  | M9a1a1c1bla | 73, 263, 309+C, 315+C, 489, 711, 750, 1041, 1438, 2706, 3106N, 3394, 4491, 4769, 5899+XC, 7028, 7142, 7697, 8701, 8860, 9242, 9540, 10398, 10400, 10873, 11719, 12705, 14308, 14417, 14766, 14783, 15043, 15301, 15326, 16223, 16234, 16316, 16362                                             |
| K38533          | Tib_11    | Shannan  | D4j1b       | 73, 263, 309+C, 315+C, 489, 750, 1438, 1734, 2706, 3010, 3106N, 4639, 4769, 4883, 5178A, 5262, 7028, 7055, 8414, 8701, 8860, 9428, 9540, 10398, 10400, 10873, 11696, 11719, 12705, 14552, 14668, 14766, 14783, 15043, 15301, 15326, 16223, 16362                                               |
| K38529          | Tib_11    | Shannan  | Z7          | 73, 152, 249d, 263, 310, 489, 523-524d, 750, 1438, 2352, 2706, 2780, 3106N, 4363, 4715, 4769, 4841, 6752, 7028, 7196A, 8584, 8598, 8701, 8860, 9090, 9214, 9540, 10398, 10400, 10653, 10873, 11719, 12705, 14766, 14783, 15043, 15301, 15326, 15487T, 15784, 16185, 16223, 16260, 16298, 16519 |
| K38495          | Tib_11    | Shannan  | G3a2        | 73, 143, 152, 195, 309+CC, 315+C, 489, 709, 750, 1438, 2706, 3106N, 4769, 4833, 5108, 7028, 7621, 8701, 8860, 9540, 10398, 10400, 10873, 11719, 12705, 14569, 14766, 14783, 15043, 15301, 15326, 15479, 15746, 16186, 16223, 16274, 16362                                                      |
| K38491          | Tib_11    | Shannan  | M62b1b      | 73, 150, 203, 204, 263, 309+C, 315+C, 489, 750, 1438, 2706, 2735, 3030, 3106N, 3511, 4561, 4769, 7028, 7664, 8149, 8701, 8860, 9540, 10398, 10400, 10410, 10873, 11719, 12705, 13708, 14766, 14783, 15043, 15301, 15326, 15510, 15520, 15629, 15721, 16183C, 16189, 16223, 16260, 16295, 16519 |
| K38457          | Tib_11    | Shannan  | M13a1b      | 73, 152, 263, 310, 489, 750, 1438, 2706, 3106N, 3644, 4769, 5773, 6023, 6253, 6599, 6620, 7028, 8701, 8860, 9540, 10398, 10400, 10411, 10790, 10873, 11719, 12705, 13135, 14766, 14783, 15043, 15301, 15326, 15924, 16145, 16148, 16188, 16189, 16223, 16381                                   |
| 11518           | Han       | Shannxi  | A11a2       | 73, 152, 263, 315+C, 523-524d, 663, 750, 1438, 1736, 2706, 4248, 4769, 4824, 7028, 8581, 8794, 8843, 8860, 9650, 11087, 11719, 12705, 14766, 15326, 15397, 16092, 16223, 16290, 16293C, 16319                                                                                                  |
| 7588            | Han       | Liaoning | A11a        | 73, 152, 235, 263, 315+CC, 523-524d, 663, 750, 1438, 1736, 2706, 4140A, 4248, 4769, 4824, 7028, 8794, 8843, 8860, 9632, 9650, 11719, 12705, 14674, 14766, 15326, 16093, 16223, 16263, 16290, 16293C, 16319, 16519                                                                              |
| HN-SZ 517       | Han       | Hunan    | A11a1       | 73, 152, 235, 263, 315+C, 523-524d, 663, 750, 1438, 1736, 2706, 4248, 4769, 4824, 5899+XC, 6755, 7028, 8794, 8843, 8860, 9650, 11719, 12705, 14766, 15326, 16223, 16290, 16291A, 16293C, 16319                                                                                                 |
| Z11             | Tib       | Qinghai  | A11a1a      | 73, 152, 235, 263, 309+C, 315+C, 523-524d, 663, 750, 1005, 1438, 1736, 2706, 4248, 4769, 4824, 5899+XC, 6755, 7028, 8794, 8843, 8860, 9650, 9867-10217d, 11719, 12705, 14706, 14766, 15326, 16223, 16290, 16293C, 16319                                                                        |
| HN-SZ 59        | Han       | Hunan    | A11a1       | 73, 152, 235, 263, 315+C, 523-524d, 663, 750, 1438, 1736, 2706, 4248, 4769, 4824, 5899+XC, 6755, 7028, 8794, 8843, 8860, 9650, 11719, 12705, 14766, 15326, 16223, 16291A, 16293C, 16319                                                                                                        |
| Tib474          | Tib       | Rikaze   | A11a1a      | 73, 152, 235, 263, 309+C, 315+C, 523-524d, 663, 750, 1005, 1393, 1438, 1736, 2706, 4248, 4769, 4824, 6755, 7028, 7774-7900d, 8794, 8840, 8843, 8860, 9650, 11719, 12705, 14766, 15326, 15381, 16093, 16126, 16172, 16223, 16290, 16293C, 16319, 16519                                          |
| Tib282          | Tib       | Rikaze   | A11a1a      | 73, 152, 235, 263, 309+CC, 315+C, 523-524d, 663, 750, 1005, 1344, 1438, 1736, 2706, 4248, 4769, 4824, 5899+XC, 6755, 7028, 8794, 8843, 8860, 9650, 11719, 12705, 14766, 15326, 16223, 16290, 16293C, 16319, 16359                                                                              |
| R23             | Bengali   | Bengal   | A11a1a      | 73, 152, 235, 263, 309+C, 315+C, 523-524d, 663, 750, 1005, 1438, 1736, 2706, 4248, 4769, 4824, 5899+XC, 6539, 6755, 7028, 8794, 8843, 8860, 9100, 9650, 11719, 12354, 12705, 14766, 15043, 15326, 16223, 16290, 16293C, 16319, 16519                                                           |
| Nep04           | Nepalese  | Nepal    | A11a1a      | 73, 152, 235, 263, 309+C, 315+C, 523-524d, 663, 750, 1005, 1438, 1736, 2706, 4248, 4769, 4824, 5899+XC, 6755, 7028, 8563, 8794, 8843, 8860, 9650, 11719, 12705, 14766, 15326, 15479, 16093, 16223, 16290, 16293C, 16319                                                                        |
| Dongxiang<br>63 | Dongxiang | Gansu    | A11a2       | 73, 152, 235, 263, 315+C, 523-524d, 663, 750, 1438, 1736, 2706, 4248, 4769, 4824, 7028, 8794, 8843, 8860, 9650, 11719, 12705, 13105, 14766, 15326, 15397, 16092, 16223, 16290, 16293C, 16319, 16352, 16519                                                                                     |
| K28864          | Han       | Liaoning | A11a2       | 73, 152, 263, 310, 523-524d, 663, 750, 1438, 1736, 2706, 3106N, 4248, 4769, 4824, 5899+XC, 7028, 8581, 8794, 8843, 8860, 9650, 11087, 11719, 12705, 14766, 15326, 15397, 16092, 16223, 16290, 16293C, 16319                                                                                    |



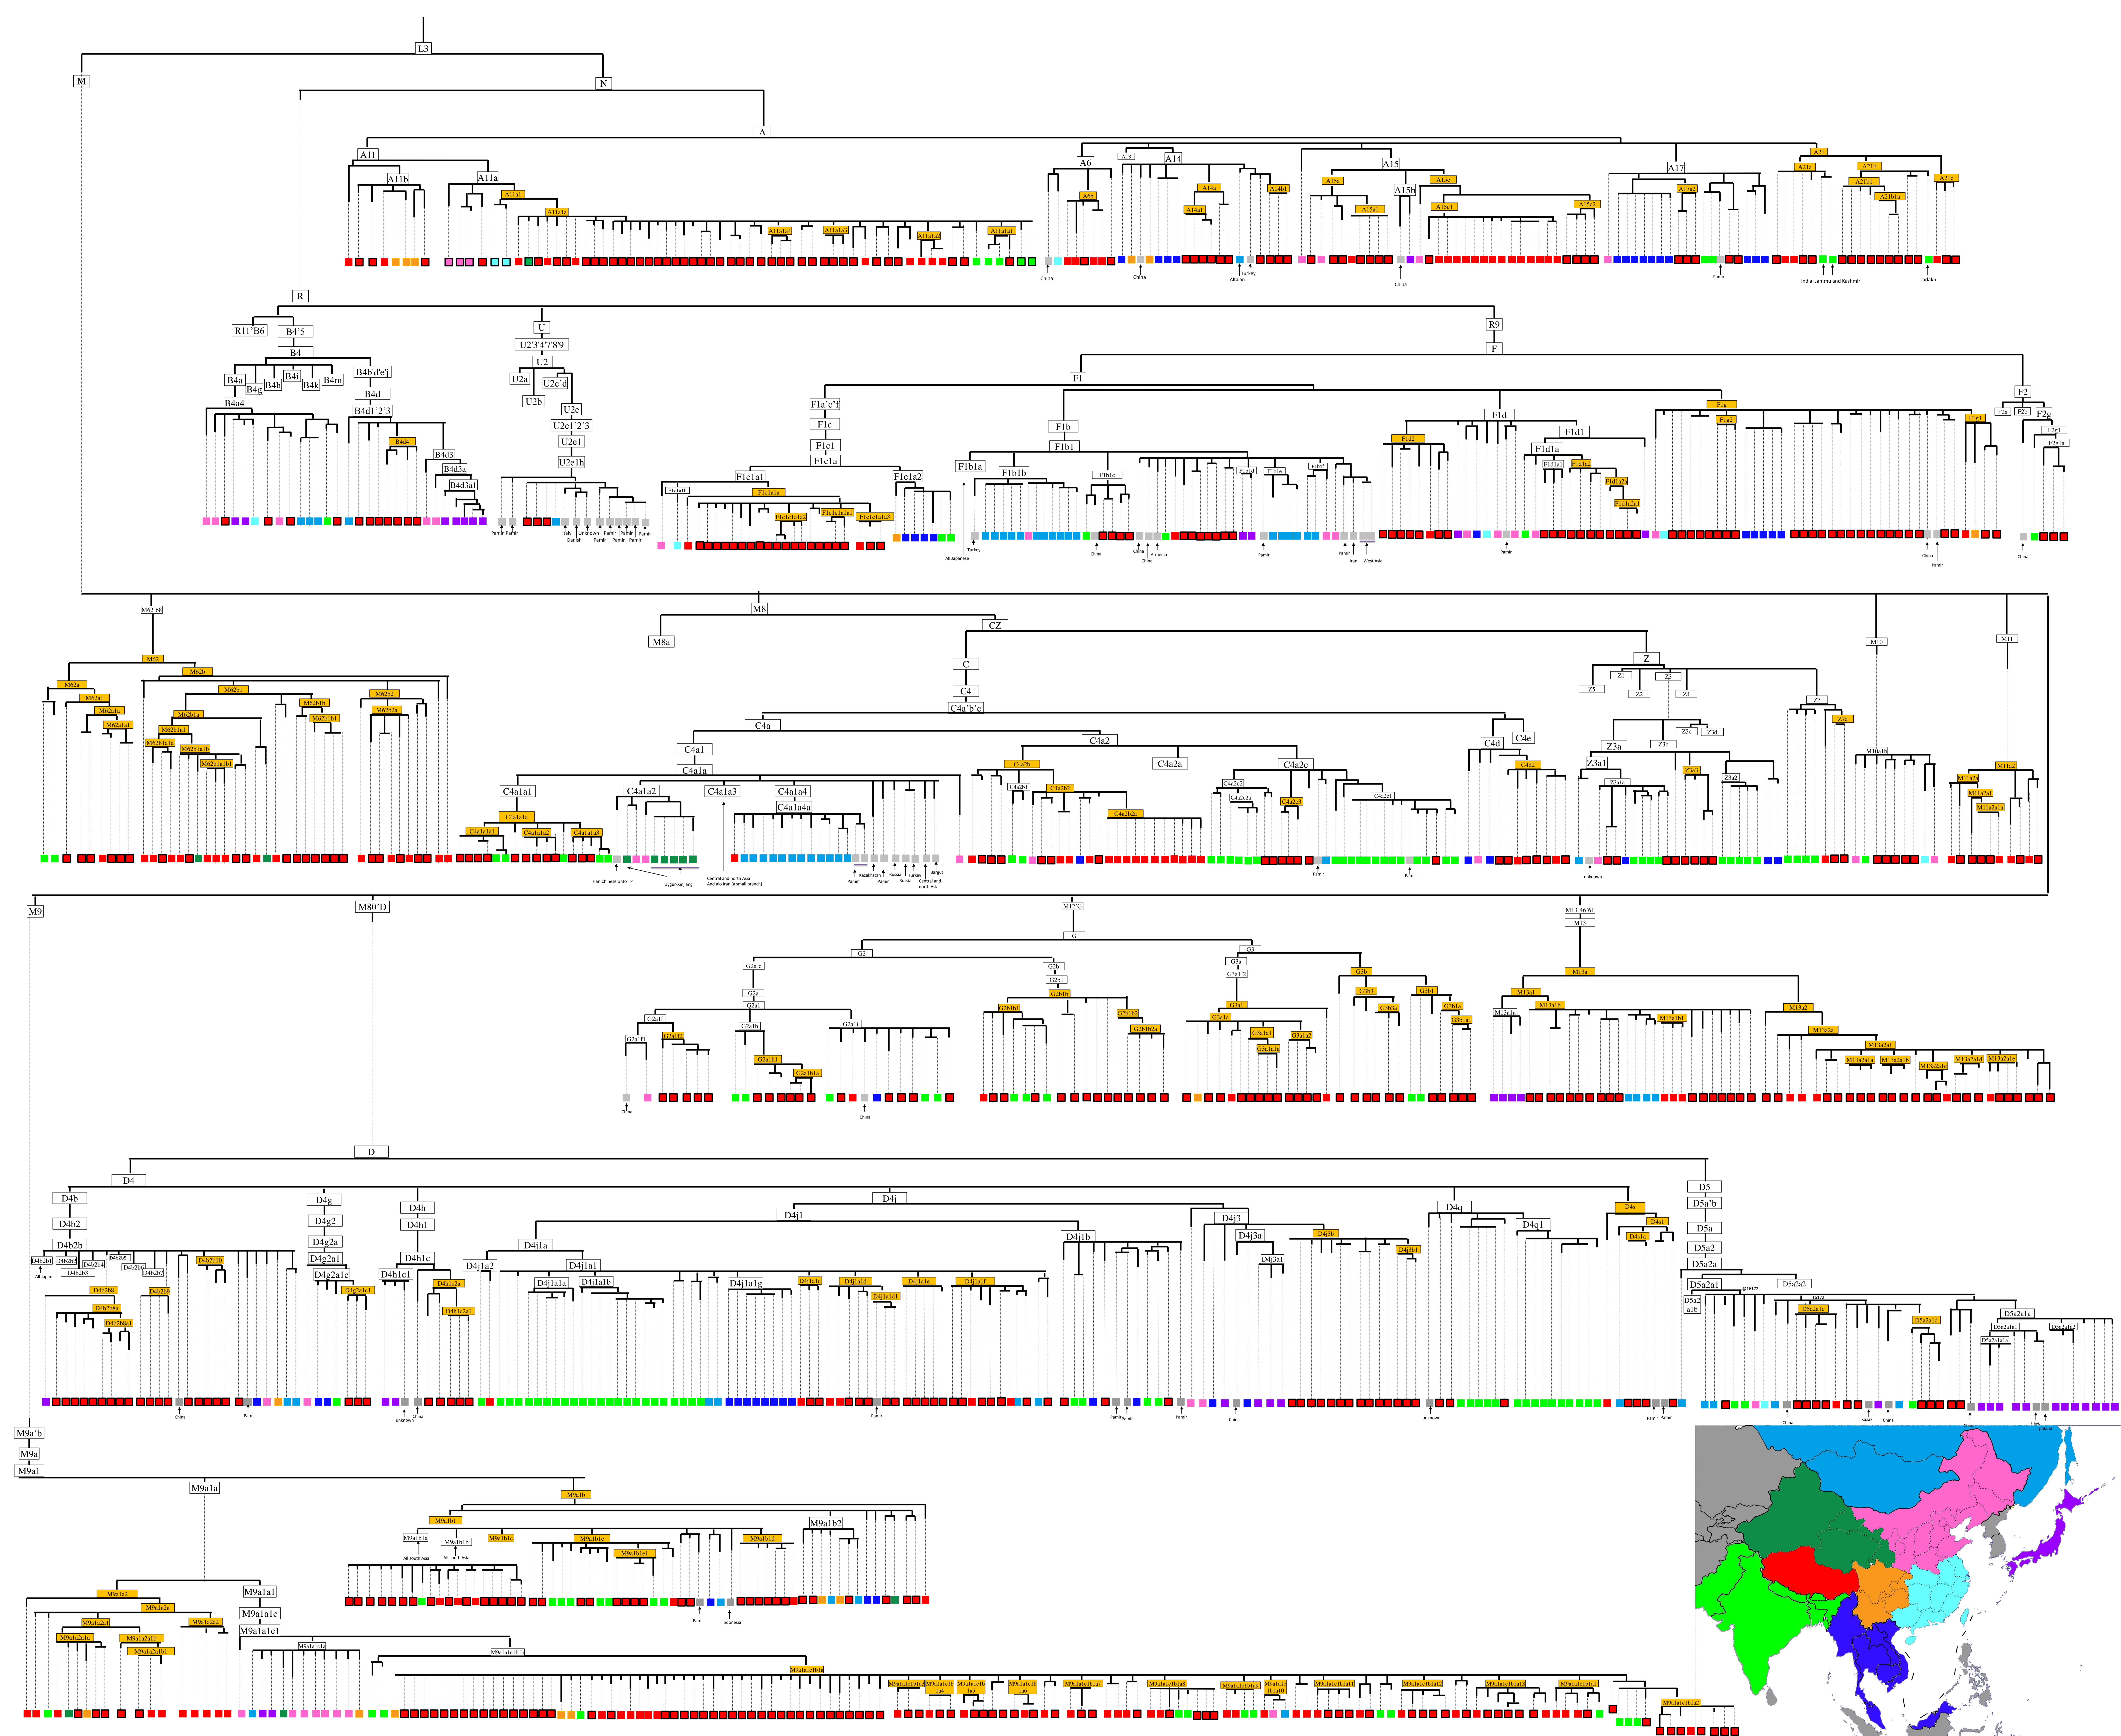

**Figure S1** Schematic phylogenetic trees of Tibetan haplogroups based on whole mtDNA sequences from this study (black outline) and previous literature (no outline). Only haplogroups in more than two Tibetan samples were included in the tree. Lengths of each branch are in proportion to variants. Locations are indicated by different colors. Haplogroups with *de novo* differentiation in Tibetans are indicated in orange.



a. A11a

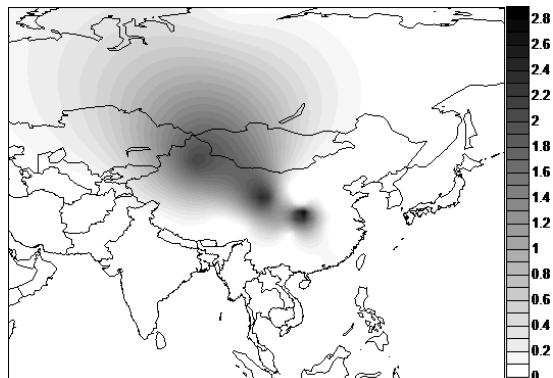

b. A11a2

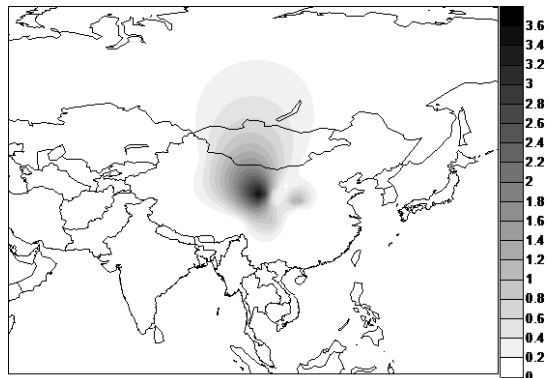

c. A11a1a

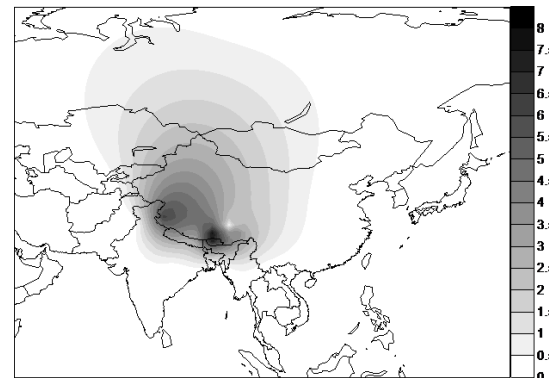

d. M9a1a1c

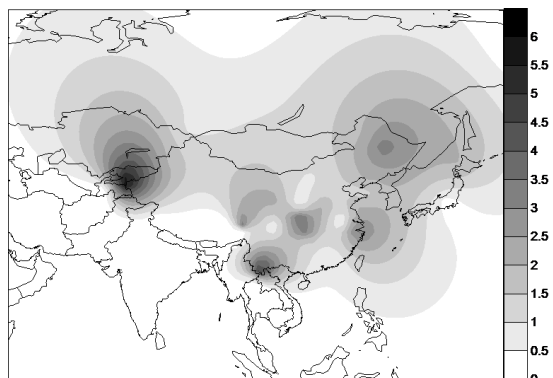

e. M9a1a1c1a

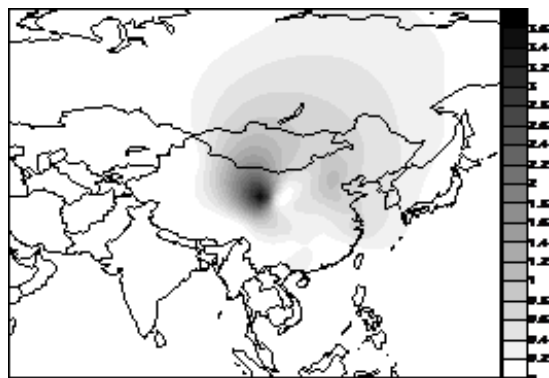

f. M9a1a1c1b1a

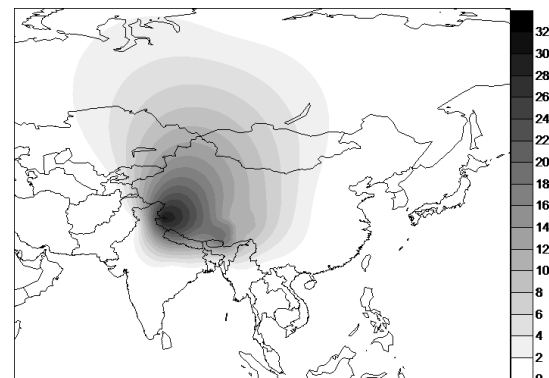

**Figure S2.** Contour maps of A11a and M9a1a1c1 and their sub-lineages (A11a2, A11a1a, M9a1a1c1a, and M9a1a1c1b1a) based on the HVS dataset (Table S3).



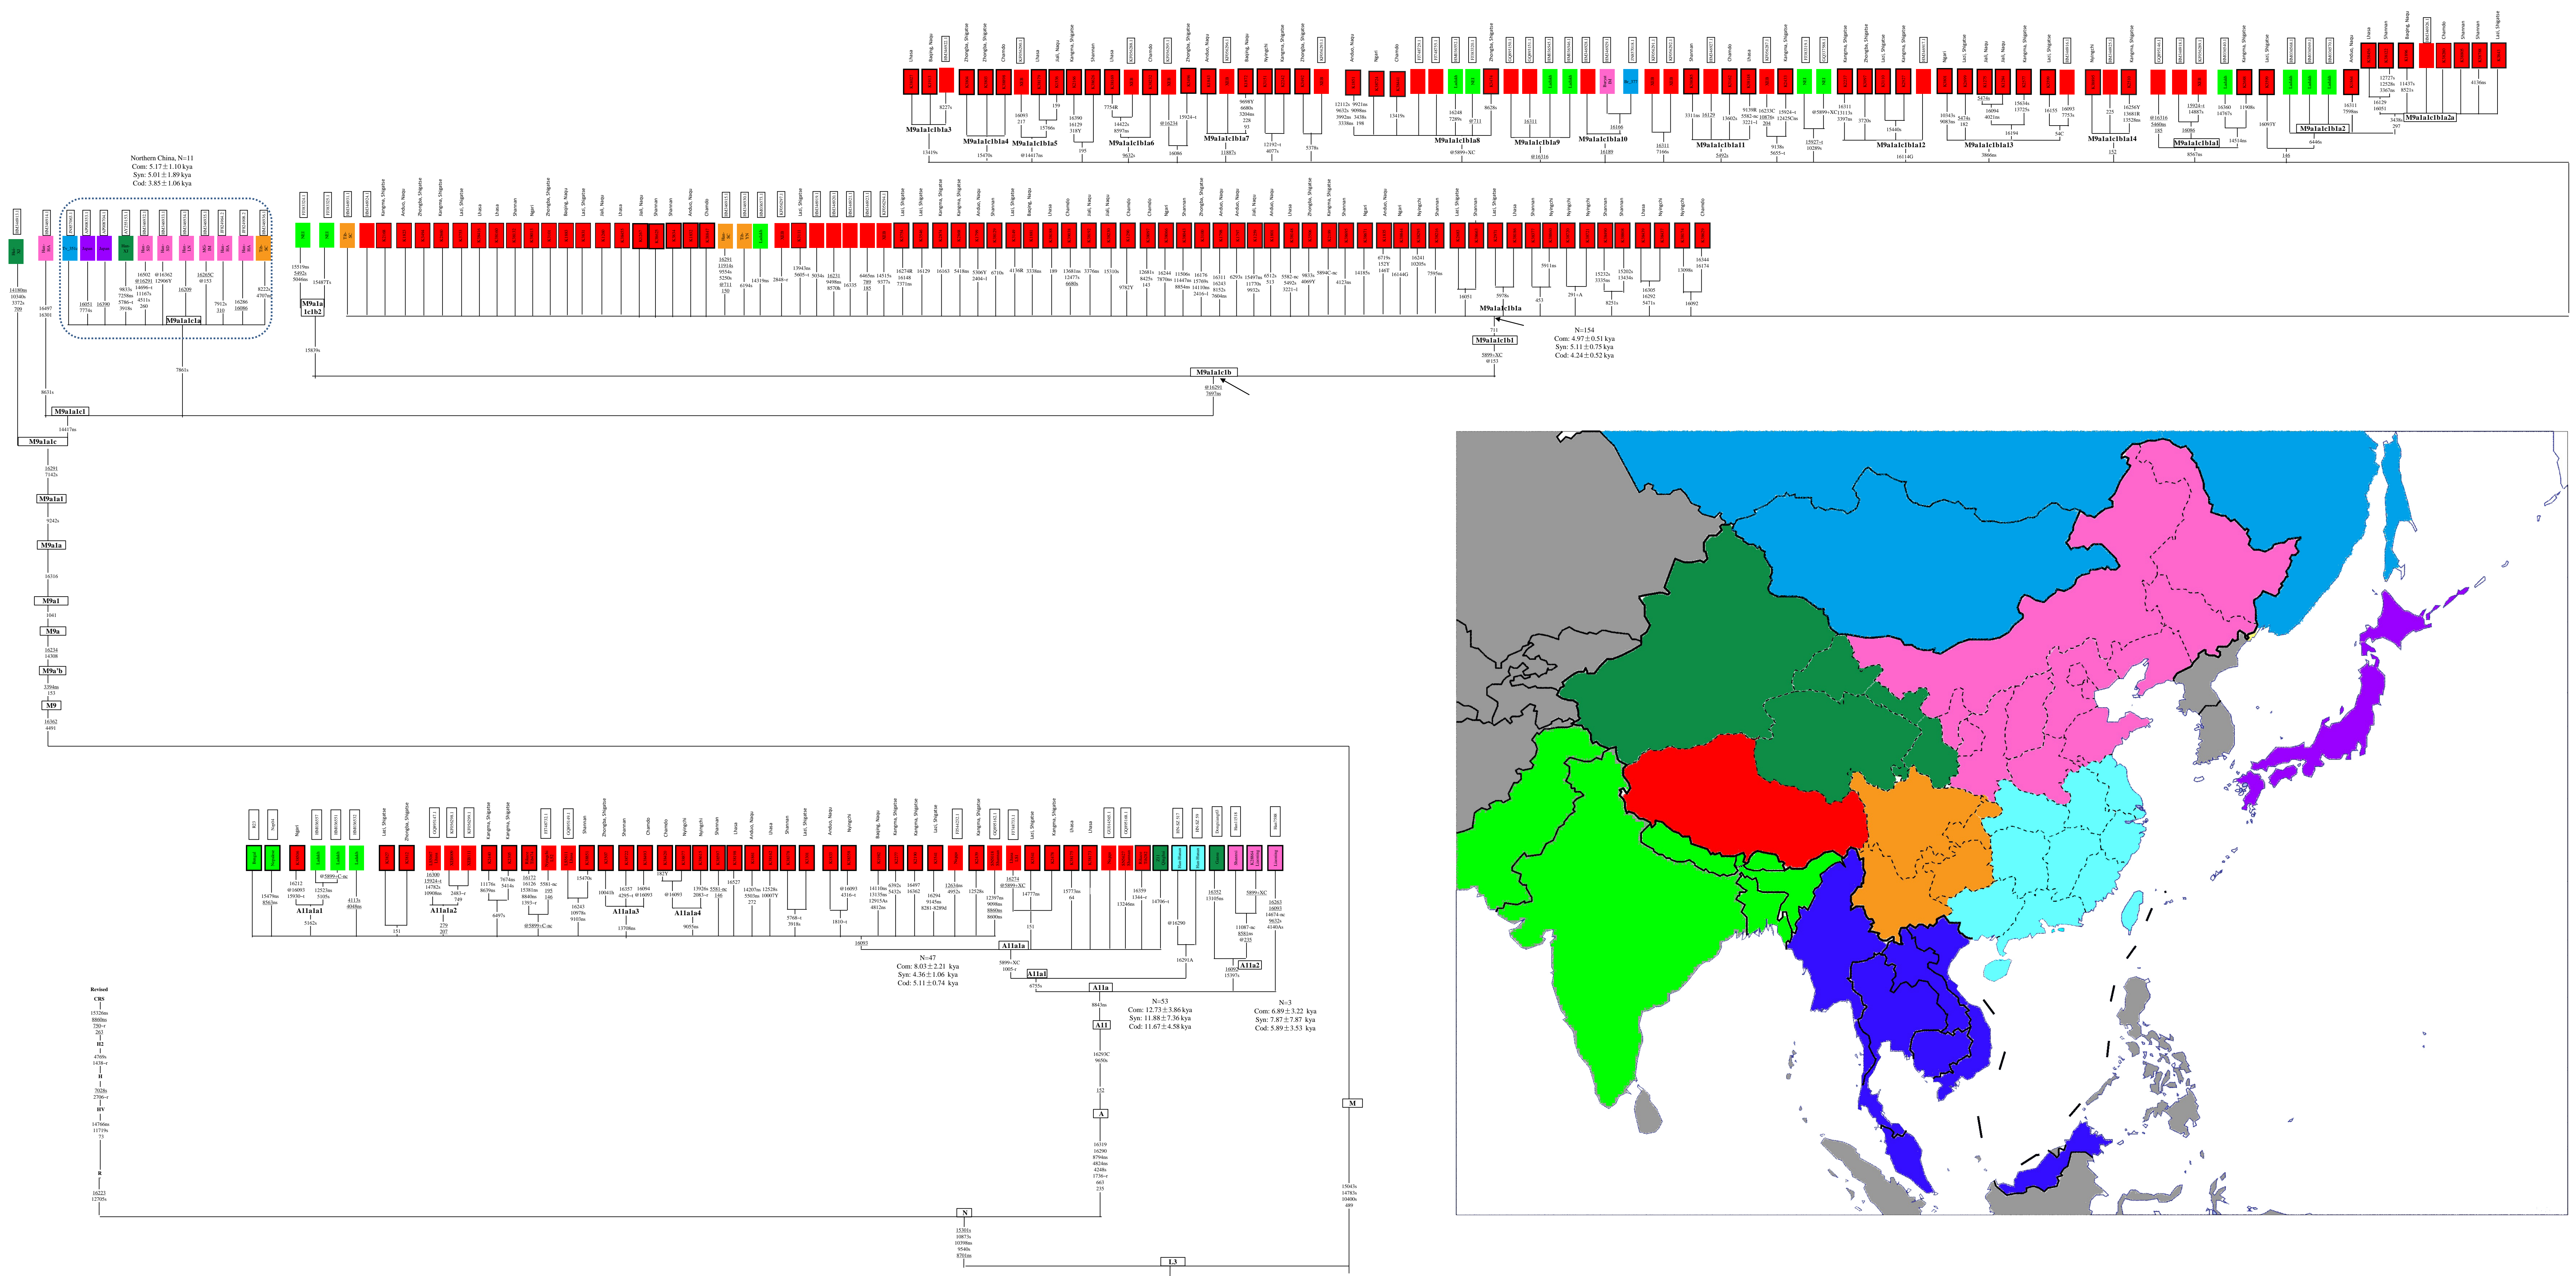

**Figure S3.** Phylogenetic trees of A11a1a and M9a1a1c1b1a. Nucleotide position numbers are consistent with the revised Cambridge reference sequence (rCRS), Suffixes C, G, and T refer to transversions; ‘d’, deletion; ‘s’, synonymous mutation; ‘ns’, non-synonymous mutation; ‘+’, insertion; recurrent mutations are underlined; ‘@’, reverse mutation; ‘h’, heterogeneity; ‘t’, change in transfer RNA; ‘r’, change in ribosomal RNA gene; nc, mutations at intergenic noncoding regions in segments 577–16023. Com, syn, and cod: coalescent age calculated based on complete genome substitutions, coding region synonymous substitutions, and coding region variants, respectively.

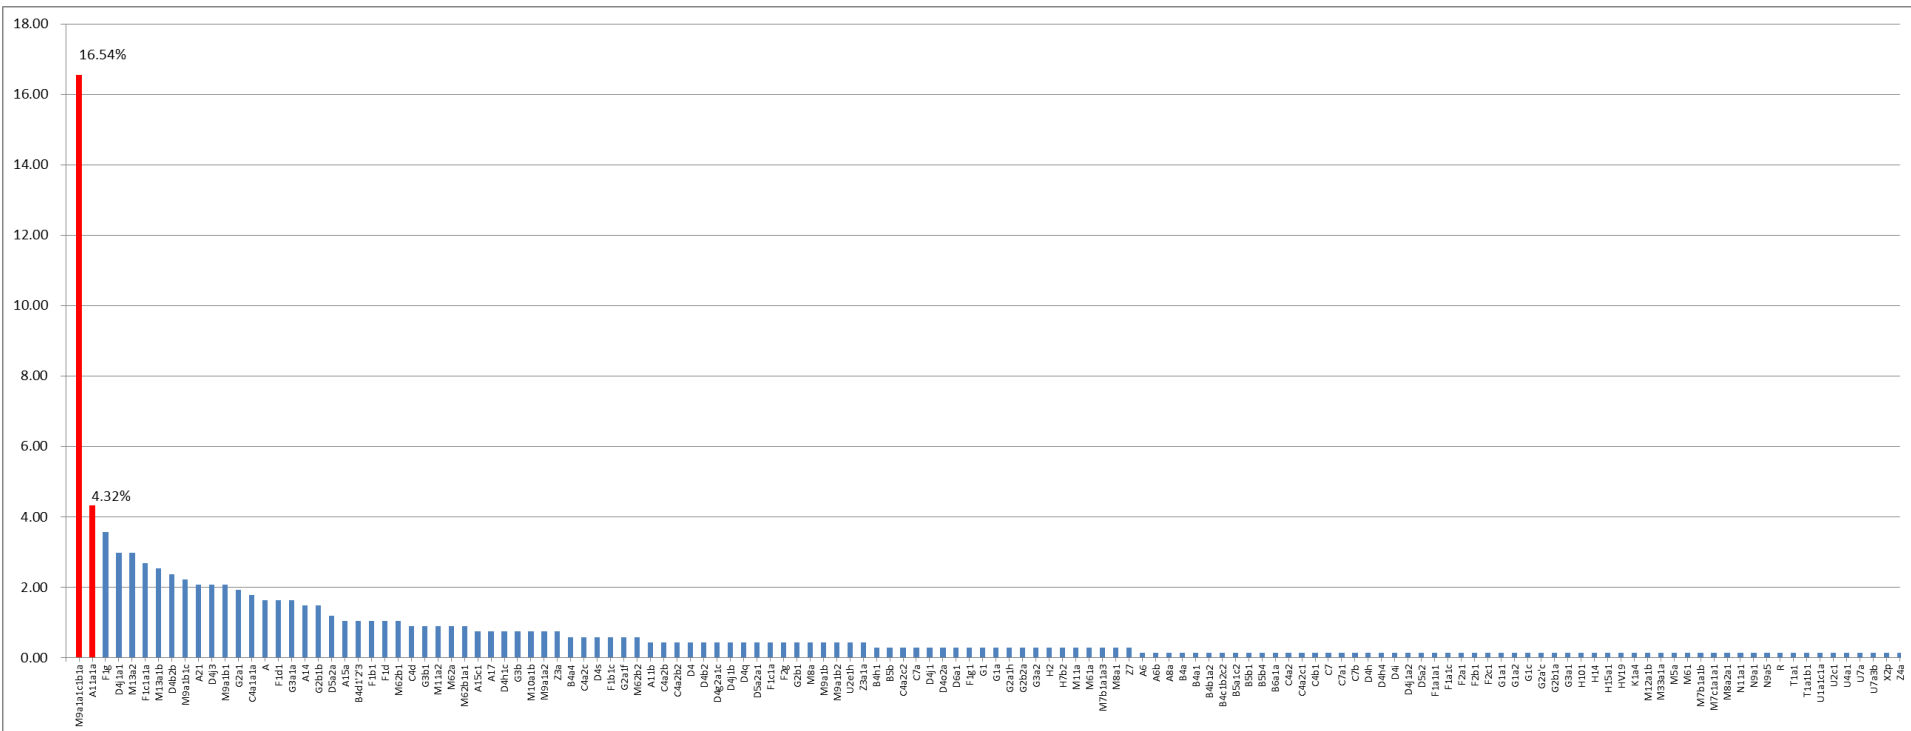

Supplement: nwz080_supplemental_file.pdf [file nwz080_supplemental_file.pdf]
